# Supplementary material for: Anatomy of the magmatic plumbing system of Los Humeros Caldera (Mexico): implications for geothermal systems
Source: Copernicus journal article supplement (doi:10.5194/se-2019-86), 2019-05-22
Supplement: Supplementary file 1 [file se-2019-86-supplement.zip]

## Sheet: S2a - CPX1
	Table S2a. Clinopyroxene: complete dataset for the EMPA, chemical formulae and thermobarometry results of CPX1 group from LHPCS lavas
	Rock Type	Sample	Spot																																					KD cpx-liq(Mg-Fe)		Predicted			Observed (Putirka et al. 1996)				T (°C)
		(thin section)		SiO2	TiO2	Al2O3	FeOtot	MnO	MgO	CaO	Na2O	Cr2O3	Total		Si	Ti	Al[IV]	Al[VI]	AlTot	Fe3+ [IV]	Fe3+ [VI]	Fe3+ Tot	Fe2+	Mn	Mg	Ca	Na	Cr		XWo	XEn	XFs		Q	J	J/(J+Q)		XAeg		[eq. 35]		XEnFs	XDiHd	XCaTs	XEnFs	XDiHd	XCaTs		[eq. 33]
				(wt%)											(apfu)																											[eq. 3.1a]	[eq. 3.2]	[eq. 3.4]
	AB	LH5-2	#46	49.4582	2.11647	4.09295	8.3932	0.194546	13.3586	20.9455	0.435909	0.10757	99.103		1.8603	0.0598805	0.139705	0.0417364	0.181441	-	0.00679779	0.00679779	0.257216	0.00619799	0.749057	0.844126	0.0317897	0.00319896		0.452988	0.402014	0.144998		1.8504	0.0635793	0.0332184		0.00679779		0.287366		0.659775	0.106543	0.0155394	0.768135	0.122755	0.0110863		1197.66
	AB	LH5-2	#47	48.5387	2.57808	4.44617	8.4042	0.147003	13.1682	21.1723	0.382584	0.157485	99.003		1.83055	0.0731342	0.169447	0.0281746	0.197622	-	0.0182835	0.0182835	0.246778	0.00469577	0.740334	0.85553	0.0279748	0.00469577		0.45856	0.396859	0.144581		1.84264	0.0559496	0.029469		0.0182835		0.285718		0.671583	0.106964	0.0153107	0.769556	0.118703	0.00331922		1186.94
	AB	LH5-2	#6	47.8988	2.99381	4.56115	9.5837	0.211451	11.8073	21.1723	0.532508	0.476374	99.258		1.81706	0.0854274	0.182944	0.0209822	0.203927	-	0.0159864	0.0159864	0.288055	0.00679422	0.667732	0.860569	0.0391667	0.0142879		0.467905	0.363097	0.168998		1.81636	0.0783334	0.0413437		0.0159864		0.283751		0.690579	0.111401	0.0154995	0.76445	0.104351	0		1170.75
	AB	LH5-2	#3	46.9856	2.93802	4.27024	10.1573	0.211552	12.3037	20.1265	0.575938	0.318604	97.92		1.80335	0.0848201	0.193163	-	0.193163	0.00348849	0.0602013	0.0636898	0.262334	0.0068773	0.703977	0.827669	0.0428586	0.0096681		0.443884	0.377588	0.178528		1.79398	0.0857171	0.0456016		0.0428586		0.269837		0.765011	0.146473	0.0165134	0.733943	0.150846	0		1108.55
	AB	LH5-2	#7	47.7457	2.92268	3.53708	11.4637	0.269347	11.5784	19.9834	0.540194	0.200018	98.267		1.83922	0.0846857	0.160583	-	0.160583	0.00019973	0.0256654	0.0258651	0.343436	0.00878814	0.664902	0.824787	0.0403455	0.00609178		0.441574	0.356014	0.202412		1.83313	0.0806911	0.0421624		0.0258651		0.263238		0.828089	0.14674	0.0151636	0.7453	0.145625	0		1074.8
	AB	LH5-2	#8	47.4484	3.28578	4.23166	11.0406	0.135148	11.3872	20.151	0.539415	0.269826	98.489		1.82353	0.0949858	0.176474	0.0151977	0.191671	-	0.00329951	0.00329951	0.351547	0.00439934	0.652402	0.829776	0.040194	0.00819877		0.450603	0.354321	0.195076		1.83372	0.0803879	0.0419975		0.00329951		0.278981		0.706505	0.13257	0.0169863	0.737917	0.134804	0		1152.93
	AB	LH5-2	#12	48.3461	2.32185	3.72117	10.7211	0.174638	12.1888	19.6207	0.449719	0.170678	97.723		1.863	0.0673	0.137	0.032	0.169	-	-	-	0.3455	0.0057	0.7002	0.8101	0.0336	0.0052		0.435173	0.376177	0.18865		1.8558	0.0672	0.0349454		0.0336		0.287888		0.640013	0.123207	0.0176648	0.738884	0.153373	0		1208.23
	AB	LH5-2	#24	48.8323	2.54534	3.10292	10.558	0.255606	12.493	19.8337	0.503157	0.0758807	98.204		1.87159	0.0733798	0.128415	0.0117468	0.140161	-	0.00499863	0.00499863	0.333408	0.00829772	0.713804	0.814476	0.0373897	0.00229937		0.434377	0.380728	0.184896		1.86169	0.0747794	0.0386164		0.00499863		0.27603		0.716695	0.127647	0.0158832	0.749877	0.151395	0		1141.66
	AB	LH5-2	#101	48.1334	2.29457	4.17813	8.71502	0.237735	13.4512	20.0137	0.420819	0.191841	97.659		1.83775	0.0658979	0.162249	0.0257601	0.188009	-	0.0300534	0.0300534	0.248215	0.00768808	0.765613	0.818731	0.0311517	0.00579102		0.437737	0.409382	0.15288		1.83256	0.0623034	0.0328802		0.0300534		0.287542		0.641761	0.123305	0.0176101	0.739226	0.153686	0		1206.29
	AB	LH5-2	#102	47.3908	2.76797	4.73169	8.43585	0.185987	12.9237	21.0199	0.464477	0.41842	98.347		1.80036	0.0790963	0.199636	0.0122185	0.211854	-	0.050869	0.050869	0.217141	0.00598459	0.731915	0.855597	0.0342119	0.0125676		0.45961	0.393213	0.147177		1.80465	0.0684238	0.0365302		0.0342119		0.282178		0.691358	0.117165	0.015886	0.757002	0.123607	0		1168.04
	AB	LH5-2	#103	47.5549	2.69066	4.69187	8.3623	0.225655	12.807	20.8002	0.448332	0.397388	98.007		1.81349	0.0771804	0.186511	0.0243622	0.210873	-	0.0289551	0.0289551	0.237732	0.0072887	0.728071	0.849883	0.0331486	0.0119814		0.458901	0.393171	0.147928		1.81569	0.0662972	0.0352273		0.0289551		0.286618		0.664996	0.114561	0.0163846	0.755076	0.121102	0		1192.29
	AB	LH5-2	#104	47.4036	2.85763	4.44886	9.22056	0.187868	12.3399	20.8844	0.496465	0.168269	98.026		1.81348	0.0822314	0.186518	0.0140712	0.200589	-	0.0397186	0.0397186	0.255277	0.00608752	0.703757	0.856045	0.0368245	0.00508957		0.460005	0.378213	0.161782		1.81508	0.073649	0.038994		0.0368245		0.282061		0.695061	0.111742	0.0152434	0.76622	0.117962	0		1166
	AB	LH5-2	#105	47.7272	2.97972	4.07545	10.1376	0.209233	12.2446	20.1207	0.458368	0.224151	98.177		1.83029	0.0859527	0.169707	0.014492	0.184199	-	0.0105942	0.0105942	0.314527	0.00679626	0.700015	0.826745	0.0340813	0.00679626		0.444789	0.376649	0.178563		1.84129	0.0681625	0.0356975		0.0105942		0.27935		0.698955	0.13075	0.0168627	0.74003	0.143006	0		1157.2
	AB	LH5-2	#107	47.9207	2.60215	3.6409	10.1069	0.211473	12.3461	20.1892	0.532877	0.170734	97.721		1.84301	0.0752777	0.156995	0.00803694	0.165032	-	0.0329465	0.0329465	0.292125	0.00688881	0.70785	0.831948	0.0397354	0.00519156		0.44446	0.378203	0.177338		1.83192	0.0794709	0.0415774		0.0329465		0.276829		0.718443	0.123004	0.0155437	0.755675	0.140045	0		1143.35
	AB	LH5-2	#112	47.7442	2.70268	3.7267	10.3213	0.207911	12.1707	20.0879	0.478178	0.1605	97.6		1.84167	0.0784177	0.158334	0.0110884	0.169422	-	0.0212777	0.0212777	0.311673	0.00679287	0.699865	0.830228	0.0357624	0.00489486		0.443997	0.374321	0.181682		1.84177	0.0715249	0.0373832		0.0212777		0.277857		0.710238	0.124553	0.0159029	0.75172	0.141465	0		1149.11
	AB	LH5-2	#135	48.2125	2.56494	3.38921	11.0512	0.280491	12.1871	20.3142	0.552077	0.0957604	98.67		1.8415	0.0736918	0.152569	-	0.152569	0.00593324	0.0491113	0.0550445	0.297958	0.00907436	0.69394	0.831351	0.0408845	0.00289183		0.440468	0.367705	0.191827		1.82325	0.081769	0.0429229		0.0408845		0.260314		0.856573	0.140121	0.014012	0.758883	0.14649	0		1061.29
	AB	LH5-2	#136	47.9003	2.65832	4.6194	9.30639	0.217152	12.3432	20.7614	0.509557	0.372216	98.688		1.82063	0.0760012	0.179367	0.0275642	0.206931	-	0.026166	0.026166	0.269649	0.00699091	0.699391	0.845501	0.0375512	0.0111855		0.457582	0.378549	0.163869		1.81454	0.0751024	0.0397442		0.026166		0.287679		0.658487	0.114305	0.0165449	0.75405	0.121666	0		1198.55
	AB	LH5-2	#137	47.4483	2.71323	4.657	8.9314	0.219609	12.5742	20.9794	0.489148	0.314794	98.327		1.80663	0.0777077	0.193371	0.0156114	0.208983	-	0.0489788	0.0489788	0.235417	0.00708247	0.713734	0.855882	0.0361106	0.00947655		0.459865	0.383531	0.156604		1.80503	0.0722213	0.0384718		0.0361106		0.283811		0.682601	0.112993	0.0156966	0.761648	0.120286	0		1176.33
	AB	LH5-2	#138	47.5291	3.02463	4.36167	10.7664	0.175781	11.736	20.1051	0.603552	0.396452	98.713		1.81692	0.0869717	0.18308	0.0134302	0.19651	-	0.028458	0.028458	0.315734	0.0056916	0.668814	0.823485	0.044734	0.0119823		0.447003	0.363084	0.189914		1.80803	0.089468	0.0471504		0.028458		0.281013		0.688087	0.135648	0.0177344	0.730158	0.142657	0		1165.87
	AB	LH5-2	#62	47.1771	2.61244	4.3297	8.77466	0.235408	12.7416	22.0694	0.462778	0.238919	98.642		1.78854	0.0744977	0.193455	-	0.193455	0.0180028	0.0893177	0.10732	0.170877	0.00755918	0.720111	0.896459	0.0340163	0.00716133		0.471227	0.378571	0.150202		1.78745	0.0680326	0.0366658		0.0340163		Undef
	AB	LH5-2	#73	47.1873	3.05247	3.34034	11.0443	0.211828	12.1139	20.9803	0.523043	0.154576	98.608		1.80603	0.0878782	0.150677	-	0.150677	0.0432922	0.0523487	0.0956409	0.257862	0.00686704	0.691182	0.86037	0.0388137	0.00467755		0.449989	0.36154	0.188471		1.80941	0.0776274	0.0411371		0.0388137		Undef
	AB	LH5-2	#74	46.0514	3.47354	4.50004	10.3405	0.172056	11.9054	21.24	0.562387	0.378522	98.628		1.76001	0.0998558	0.202695	-	0.202695	0.0372967	0.0705157	0.107812	0.222686	0.00556965	0.678303	0.86976	0.0416729	0.0114377		0.46161	0.360037	0.178354		1.77075	0.0833458	0.0449523		0.0416729		Undef
	AB	LH5-2	#88	47.7405	2.43801	3.74419	9.70626	0.21682	13.1339	21.0896	0.4533	0.159277	98.686		1.81051	0.069547	0.167351	-	0.167351	0.0221377	0.0789493	0.101087	0.206751	0.00696465	0.742532	0.856951	0.0333308	0.00477576		0.447646	0.387919	0.164435		1.80623	0.0666617	0.0355929		0.0333308		Undef
	AB	LH5-2	#96	47.8733	2.19262	3.52946	9.32083	0.160211	13.3372	20.6683	0.452239	0.366373	97.923		1.8266	0.0629278	0.158714	-	0.158714	0.0146865	0.0699475	0.084634	0.21278	0.00517761	0.758619	0.844946	0.0334553	0.0110522		0.443256	0.398013	0.158731		1.81634	0.0669106	0.0355292		0.0334553		Undef
	AB	LH5-2	#2	48.2605	2.20561	2.97862	11.7319	0.279378	12.3708	20.0152	0.454663	0.108537	98.452		1.8492	0.0635696	0.134512	-	0.134512	0.0162909	0.0541537	0.0704446	0.305493	0.00906713	0.706638	0.821721	0.0337776	0.00328808		0.429451	0.369346	0.201202		1.83385	0.0675551	0.035529		0.0337776		Undef
	AB	LH5-2	#110	46.8609	3.29691	3.26546	13.0501	0.288874	10.1521	20.022	0.582345	bdl	97.538		1.83626	0.0971761	0.150808	-	0.150808	0.0129335	0.0130334	0.0259669	0.401688	0.00958778	0.593044	0.840628	0.0442436	-		0.449304	0.317008	0.233688		1.83536	0.0884872	0.0459949		0.0259669		Undef
	AB	LH5-2	#63	47.3577	2.88798	3.54015	10.3809	0.292846	12.4316	21.1153	0.525193	0.175026	98.721		1.80473	0.082784	0.159001	-	0.159001	0.0362678	0.0632323	0.0995	0.231338	0.0094525	0.706251	0.862168	0.038805	0.0052735		0.451688	0.370044	0.178268		1.79976	0.07761	0.0413398		0.038805		Undef
	AB	LH5-2	#66	47.4459	2.81192	3.76918	10.0759	0.287421	12.8044	20.6323	0.536	0.337712	98.709		1.80429	0.080434	0.168931	-	0.168931	0.0267782	0.0642079	0.090986	0.229456	0.00925788	0.725897	0.840675	0.0395202	0.0101538		0.443316	0.382831	0.173853		1.79603	0.0790404	0.0421533		0.0395202		Undef
	AB	LH5-2	#79	47.2501	2.93787	3.59765	11.2919	0.218186	11.9112	20.7754	0.588005	0.154731	98.727		1.80672	0.0844986	0.16213	-	0.16213	0.031152	0.0631998	0.0943518	0.266733	0.00706643	0.678975	0.851157	0.0435929	0.00467778		0.448369	0.357707	0.193924		1.79686	0.0871859	0.0462758		0.0435929		Undef
	AB	LH27-1	#47	47.2323	2.29848	4.30584	9.73585	0.224408	12.7607	20.8626	0.428396	0.0592788	97.914		1.80569	0.066096	0.194008	-	0.194008	0.000298626	0.0920764	0.0923751	0.218893	0.00726657	0.727255	0.854569	0.0317539	0.00179176		0.449673	0.382722	0.167604		1.80072	0.0635079	0.0340666		0.0317539		0.276341		0.720914	0.111055	0.0155582	0.770191	0.138207	0		1148.41
	AB	LH27-1	#61	47.3272	2.44976	4.278	10.3326	0.2839	12.0224	21.3281	0.483962	0.271083	98.781		1.8025	0.0701807	0.192026	-	0.192026	0.00547509	0.0847145	0.0901896	0.238913	0.00915833	0.682594	0.87034	0.0357374	0.00816286		0.460192	0.360961	0.178847		1.79185	0.0714748	0.0383588		0.0357374		0.270583		0.777627	0.109721	0.0143406	0.780923	0.119226	0		1113.12
	AB	LH27-1	#41	47.4893	2.39589	3.94874	9.56342	0.175258	12.9502	20.7234	0.405648	0.214106	97.87		1.81669	0.0689415	0.178032	-	0.178032	0.0052802	0.0690411	0.0743213	0.231631	0.0056787	0.738531	0.849415	0.0300872	0.00647572		0.447145	0.388816	0.164039		1.81958	0.0601743	0.0320119		0.0300872		0.267262		0.790611	0.122984	0.0151272	0.765484	0.142763	0		1101.8
	AB	LH27-1	#149	47.9624	2.41448	4.08249	10.2888	0.208206	12.5147	21.0652	0.439848	0.282975	99.259		1.81548	0.0687456	0.182126	-	0.182126	0.00239115	0.0708379	0.0732291	0.252466	0.0066753	0.706187	0.854339	0.0322806	0.00846867		0.451325	0.373101	0.175574		1.81299	0.0645611	0.0343858		0.0322806		0.271037		0.764058	0.116963	0.0152219	0.768639	0.134789	0		1119.32
	AB	LH27-1	#153	47.2338	2.6854	4.14523	10.6133	0.200275	12.4784	20.4088	0.516871	0.214554	98.519		1.80188	0.0770571	0.186371	-	0.186371	0.0117477	0.0757629	0.0875106	0.251083	0.0064712	0.709642	0.834188	0.0382299	0.0064712		0.441613	0.375721	0.182666		1.79491	0.0764598	0.0408576		0.0382299		0.257509		0.875584	0.151492	0.0157882	0.744776	0.155628	0		1056.06
	AB	LH27-1	#155	47.6314	2.37728	3.9808	9.38878	0.250373	12.982	21.1047	0.432107	0.192062	98.401		1.81092	0.0679856	0.178375	-	0.178375	0.0107005	0.0791838	0.0898843	0.208635	0.00806271	0.735797	0.859724	0.0318527	0.0057733		0.451971	0.386862	0.161167		1.80416	0.0637054	0.034106		0.0318527		0.262364		0.843655	0.121233	0.0139994	0.776045	0.133169	0		1075.42
	AB	LH27-1	#156	47.437	2.42062	4.2168	9.36043	0.126815	12.9764	21.1331	0.537783	0.175619	98.401		1.80106	0.0691302	0.188691	-	0.188691	0.0102452	0.0949918	0.105237	0.191973	0.00407818	0.734471	0.859701	0.0395882	0.0052718		0.453542	0.387518	0.158939		1.78614	0.0791764	0.0424465		0.0395882		0.267644		0.793614	0.117404	0.0146192	0.773266	0.133806	0		1101.79
	AB	LH27-1	#160	49.3663	1.70863	3.58368	8.18465	0.198328	14.3699	21.0462	0.422203	0.472154	99.352		1.84458	0.0480223	0.155425	0.00239115	0.157816	-	0.0736276	0.0736276	0.182126	0.00627678	0.800438	0.842582	0.0305868	0.0139484		0.442271	0.420196	0.137533		1.82515	0.0611737	0.0324301		0.0305868		0.275943		0.718103	0.112275	0.0156268	0.768749	0.146982	0		1148.44
	AB	LH27-1	#193	48.1786	2.17515	4.38709	7.83519	0.153158	13.6728	21.2548	0.438317	0.719936	98.815		1.8139	0.0615998	0.186095	0.00857214	0.194667	-	0.0648891	0.0648891	0.181809	0.00488413	0.767406	0.857413	0.031996	0.0214304		0.456928	0.409007	0.134065		1.80663	0.063992	0.034209		0.031996		0.279491		0.704647	0.112493	0.0163289	0.763186	0.128216	0		1162.63
	AB	LH27-1	#181	47.5492	3.21639	3.94391	12.6454	0.26191	10.9803	20.0614	0.555932	0.257477	99.476		1.81894	0.0925496	0.177811	-	0.177811	0.00324473	0.0294022	0.0326469	0.371896	0.00848621	0.626182	0.822264	0.041233	0.00778735		0.441716	0.336419	0.221866		1.82034	0.082466	0.0433391		0.0326469		0.254176		0.918015	0.167894	0.0164101	0.732585	0.150485	0		1038.97
	AB	LH27-1	#78	48.4895	2.13402	3.64013	11.1742	0.204713	12.5793	20.2115	0.498641	0.176112	99.139		1.83922	0.0608854	0.160783	0.00194315	0.162726	-	0.0684587	0.0684587	0.285992	0.00657682	0.711293	0.821405	0.0366707	0.00528138		0.433737	0.375634	0.190629		1.81869	0.0733415	0.0387634		0.0366707		0.275343		0.712144	0.125614	0.017053	0.748565	0.161713	0		1147.92
	AB	LH27-1	#134	46.657	2.87716	4.24061	10.1062	0.180756	11.6051	21.8915	0.44702	0.24944	98.265		1.79008	0.0830326	0.191751	-	0.191751	0.0181696	0.0695423	0.0877119	0.236553	0.00587401	0.663763	0.899918	0.0332529	0.00756652		0.475173	0.350517	0.174311		1.80023	0.0665057	0.0356267		0.0332529		Undef
	AB	LH27-1	#11	47.5816	2.34374	2.61934	14.7411	0.245404	10.7413	19.7757	0.464561	bdl	98.533		1.84626	0.0684059	0.119785	-	0.119785	0.033954	0.0513791	0.0853331	0.39301	0.00806532	0.621328	0.822165	0.0349497	-		0.426004	0.321976	0.25202		1.8365	0.0698994	0.0366656		0.0349497		Undef
	AB	LH27-1	#47	47.2323	2.29848	4.30584	9.73585	0.224408	12.7607	20.8626	0.428396	0.0592788	97.914		1.80569	0.066096	0.194008	-	0.194008	0.000298626	0.0920764	0.0923751	0.218893	0.00726657	0.727255	0.854569	0.0317539	0.00179176		0.449673	0.382722	0.167604		1.80072	0.0635079	0.0340666		0.0317539		0.276341		0.720914	0.111055	0.0155582	0.770191	0.138207	0		1148.41
	AB	LH27-1	#60	46.6461	2.71753	4.19732	10.416	0.235821	11.5245	21.9057	0.48299	0.193577	98.344		1.78859	0.0783787	0.18968	-	0.18968	0.0217332	0.0846948	0.106428	0.227577	0.00765883	0.658759	0.899963	0.035907	0.00586846		0.473555	0.346673	0.179772		1.7863	0.071814	0.0386489		0.035907		Undef
	AB	LH27-1	#64	47.4447	2.44262	3.45554	11.433	0.231869	11.9312	20.3894	0.465151	0.127469	97.921		1.82923	0.0708379	0.157019	-	0.157019	0.0137491	0.0599781	0.0737272	0.294909	0.00757198	0.685763	0.842284	0.0347713	0.00388562		0.442304	0.36015	0.197546		1.82296	0.0695427	0.0367465		0.0347713		Undef
	AB	LH27-1	#1	47.6999	2.1121	3.12848	11.2838	0.305484	12.2208	20.5823	0.479096	0.153815	97.98		1.83442	0.0610976	0.141798	-	0.141798	0.0237823	0.0744316	0.0982138	0.26469	0.00995074	0.700632	0.848102	0.0357232	0.00467685		0.441341	0.36464	0.194019		1.81342	0.0714463	0.0379052		0.0357232		Undef
	AB	LH27-1	#9	47.5494	2.1279	2.91703	11.8497	0.252164	12.2592	20.0373	0.469837	0.0943873	97.557		1.8387	0.0618936	0.132942	-	0.132942	0.0283596	0.0698542	0.0982138	0.284989	0.00825912	0.706702	0.830191	0.0352256	0.00288572		0.430505	0.366508	0.202987		1.82188	0.0704513	0.0372298		0.0352256		Undef
	AB	LH27-1	#10	47.473	2.49982	3.71684	10.653	0.165352	11.9487	20.9699	0.425384	0.206665	98.081		1.82447	0.0722651	0.168353	-	0.168353	0.00717668	0.0564166	0.0635933	0.278794	0.00538251	0.684575	0.863494	0.031697	0.00627959		0.455454	0.361122	0.183424		1.82686	0.063394	0.0335372		0.031697		0.258963		0.884979	0.120859	0.0133212	0.782197	0.125166	0		1057.18
	AB	LH27-1	#22	43.6017	4.56941	4.20606	16.5148	0.421217	8.49258	19.5169	0.717904	bdl	98.122		1.72317	0.135836	0.195909	-	0.195909	0.0809254	0.0589812	0.139907	0.405918	0.0140999	0.500348	0.826432	0.0550094	-		0.438023	0.265222	0.296755		1.7327	0.110019	0.0597047		0.0550094		Undef
	AB	LH27-1	#23	45.7409	3.54739	3.37781	16.2619	0.358329	8.87827	19.2668	0.707031	0.0447857	98.201		1.8008	0.105051	0.15673	-	0.15673	0.0424684	0.0416719	0.0841403	0.451271	0.0119489	0.521072	0.812726	0.0539693	0.00139404		0.432028	0.277021	0.290951		1.78507	0.107939	0.0570196		0.0539693		Undef
	AB	LH27-1	#25	45.2928	3.65993	2.70289	17.8797	0.309969	8.31596	19.0125	0.631922	0.0537636	97.877		1.80261	0.109566	0.126782	-	0.126782	0.0706058	0.0253265	0.0959323	0.499167	0.0104491	0.493395	0.810748	0.0487623	0.00169175		0.424539	0.258389	0.317072		1.80331	0.0975246	0.0513062		0.0487623		Undef
	AB	LH27-1	#31	47.0024	2.64412	2.97102	16.2639	0.333731	9.47052	19.3065	0.521438	bdl	98.533		1.83949	0.0778373	0.137037	-	0.137037	0.0234708	0.0438022	0.067273	0.465031	0.0110627	0.552535	0.809568	0.0395665	-		0.424858	0.29	0.285142		1.82713	0.0791329	0.041512		0.0395665		Undef
	AB	LH27-1	#34	47.4104	2.61487	3.07796	11.9986	0.278783	12.3705	20.2123	0.477785	0.0787676	98.52		1.81715	0.0753873	0.139039	-	0.139039	0.0438101	0.0651931	0.109003	0.275591	0.00905045	0.70683	0.830055	0.0355056	0.00238693		0.42995	0.366162	0.203889		1.81248	0.0710112	0.037702		0.0355056		Undef
	AB	LH27-1	#37	47.7394	2.52758	3.42992	10.4908	0.178587	12.6502	20.9817	0.387394	0.0593752	98.445		1.82307	0.0726041	0.154371	-	0.154371	0.0225581	0.0586112	0.0811692	0.253865	0.00577646	0.720165	0.858502	0.0286831	0.00179269		0.447243	0.375217	0.17754		1.83253	0.0573662	0.0303541		0.0286831		Undef
	AB	LH27-1	#41	47.4893	2.39589	3.94874	9.56342	0.175258	12.9502	20.7234	0.405648	0.214106	97.87		1.81669	0.0689415	0.178032	-	0.178032	0.0052802	0.0690411	0.0743213	0.231631	0.0056787	0.738531	0.849415	0.0300872	0.00647572		0.447145	0.388816	0.164039		1.81958	0.0601743	0.0320119		0.0300872		0.267262		0.790611	0.122984	0.0151272	0.765484	0.142763	0		1101.8
	AB	LH27-1	#44	46.5169	2.83947	4.11507	10.7048	0.233712	12.4104	21.1422	0.460787	0.220726	98.644		1.77419	0.0814623	0.184979	-	0.184979	0.0408305	0.090304	0.131135	0.210312	0.00755017	0.705643	0.863998	0.0340751	0.00665607		0.450304	0.367812	0.181883		1.77995	0.0681502	0.0368758		0.0340751		Undef
	AB	LH27-1	#57	45.8196	3.17884	3.91131	13.2187	0.303876	11.7801	19.5995	0.443386	0.0976627	98.353		1.76857	0.0922932	0.17793	-	0.17793	0.0534982	0.0770434	0.130542	0.296153	0.00993468	0.677843	0.81057	0.0331818	0.0029804		0.421055	0.352147	0.226798		1.78457	0.0663637	0.0358542		0.0331818		Undef
	AB	LH27-1	#62	45.8694	2.98148	3.04843	15.3251	0.370146	9.83517	19.6779	0.549	0.0447704	97.739		1.8036	0.0881819	0.14127	-	0.14127	0.0551261	0.0604946	0.115621	0.388319	0.0123276	0.576513	0.829029	0.0418541	0.00139182		0.431371	0.300011	0.268617		1.79386	0.0837082	0.0445833		0.0418541		Undef
	AB	LH27-1	#63	44.8082	3.64286	3.31286	17.3519	0.358467	8.10807	19.9768	0.616041	bdl	98.231		1.77448	0.108514	0.154622	-	0.154622	0.0709015	0.0546046	0.125506	0.449159	0.0120239	0.478672	0.847639	0.0473008	-		0.443089	0.250245	0.306666		1.77547	0.0946016	0.0505872		0.0473008		Undef
	AB	LH27-1	#85	47.2915	2.71695	3.29464	12.0702	0.287095	11.866	20.2351	0.491003	0.0654393	98.318		1.82014	0.0786559	0.149446	-	0.149446	0.0304169	0.0571998	0.0876167	0.300884	0.00935905	0.680821	0.834449	0.0366397	0.00199129		0.436157	0.355897	0.207946		1.81615	0.0732794	0.0387838		0.0366397		Undef
	AB	LH27-1	#99	46.8038	3.05819	3.26683	12.7514	0.197242	11.1532	20.2556	0.554115	0.0585152	98.113		1.81316	0.0891146	0.149155	-	0.149155	0.037687	0.0484405	0.0861275	0.326986	0.00647201	0.644114	0.840764	0.04162	0.00179225		0.441459	0.338241	0.2203		1.81186	0.08324	0.0439237		0.04162		Undef
	AB	LH27-1	#145	45.8848	3.33099	3.51862	15.0933	0.335054	10.6108	19.1324	0.551196	bdl	98.496		1.78435	0.0974349	0.161265	-	0.161265	0.0543846	0.0611454	0.11553	0.375323	0.011036	0.615132	0.797176	0.041559	-		0.416445	0.321381	0.262174		1.78763	0.0831179	0.0444303		0.041559		Undef
	AB	LH27-1	#153	47.2338	2.6854	4.14523	10.6133	0.200275	12.4784	20.4088	0.516871	0.214554	98.519		1.80188	0.0770571	0.186371	-	0.186371	0.0117477	0.0757629	0.0875106	0.251083	0.0064712	0.709642	0.834188	0.0382299	0.0064712		0.441613	0.375721	0.182666		1.79491	0.0764598	0.0408576		0.0382299		0.257509		0.875584	0.151492	0.0157882	0.744776	0.155628	0		1056.06
	AB	LH27-1	#155	47.6314	2.37728	3.9808	9.38878	0.250373	12.982	21.1047	0.432107	0.192062	98.401		1.81092	0.0679856	0.178375	-	0.178375	0.0107005	0.0791838	0.0898843	0.208635	0.00806271	0.735797	0.859724	0.0318527	0.0057733		0.451971	0.386862	0.161167		1.80416	0.0637054	0.034106		0.0318527		0.262364		0.843655	0.121233	0.0139994	0.776045	0.133169	0		1075.42
	AB	LH27-1	#156	47.437	2.42062	4.2168	9.36043	0.126815	12.9764	21.1331	0.537783	0.175619	98.401		1.80106	0.0691302	0.188691	-	0.188691	0.0102452	0.0949918	0.105237	0.191973	0.00407818	0.734471	0.859701	0.0395882	0.0052718		0.453542	0.387518	0.158939		1.78614	0.0791764	0.0424465		0.0395882		0.267644		0.793614	0.117404	0.0146192	0.773266	0.133806	0		1101.79
	AB	LH27-1	#7	47.9095	2.51131	3.61293	11.1966	0.266385	12.3703	20.5881	0.591332	0.199101	99.26		1.81701	0.0716418	0.161493	-	0.161493	0.0214925	0.0772139	0.0987065	0.256418	0.00855721	0.699403	0.836617	0.0434826	0.00597015		0.44038	0.368194	0.191426		1.79244	0.0869652	0.0462728		0.0434826		Undef
	AB	LH27-1	#48	48.0856	2.04587	3.2276	11.4484	0.253803	13.0011	20.2349	0.553025	0.225477	99.086		1.8224	0.0583224	0.144167	-	0.144167	0.0334335	0.0948359	0.128269	0.234581	0.00814725	0.734544	0.82168	0.0406369	0.00675625		0.426341	0.381171	0.192488		1.7908	0.0812738	0.0434137		0.0406369		Undef
	AB	LH27-1	#29	45.973	3.23317	3.82533	13.8194	0.32545	11.0756	19.9568	0.548769	0.0423599	98.806		1.77254	0.0937671	0.173827	-	0.173827	0.0536379	0.0796623	0.1333	0.312292	0.0106283	0.636603	0.824435	0.0410231	0.00129128		0.429997	0.332066	0.237937		1.77333	0.0820462	0.0442208		0.0410231		Undef
	AB	LH27-1	#46	47.7182	2.28933	3.16352	11.6559	0.283398	12.9269	20.1847	0.440043	0.108901	98.775		1.81786	0.0656015	0.142037	-	0.142037	0.0401064	0.080163	0.120269	0.251075	0.00914445	0.73414	0.823895	0.0325025	0.00328007		0.424998	0.37874	0.196262		1.80911	0.0650051	0.0346858		0.0325025		Undef
	AB	LH27-1	#82	47.0404	2.7565	2.95102	14.6236	0.300678	10.9473	19.5699	0.549295	bdl	98.768		1.81882	0.0801691	0.134477	-	0.134477	0.046699	0.0611215	0.10782	0.365038	0.00984707	0.631008	0.810742	0.0411787	-		0.421274	0.327917	0.250809		1.80679	0.0823573	0.043595		0.0411787		Undef
	AB	LH27-1	#86	48.0979	1.97543	2.82905	12.4778	0.256728	12.4767	19.4227	0.515372	0.0622098	98.13		1.84903	0.057123	0.128178	-	0.128178	0.0227895	0.0732448	0.0960342	0.30512	0.00835946	0.715032	0.80002	0.0384137	0.00189083		0.415676	0.371558	0.212765		1.82017	0.0768274	0.0404994		0.0384137		Undef
	AB	LH27-1	#87	47.762	2.69958	2.96838	12.7174	0.260254	11.772	20.0435	0.482863	bdl	98.729		1.83477	0.0780055	0.134393	-	0.134393	0.0308336	0.0444821	0.0753157	0.333242	0.00846803	0.674155	0.824986	0.0359642	-		0.430528	0.351854	0.217619		1.83238	0.0719285	0.0377714		0.0359642		Undef
	AB	LH27-1	#121	48.8678	2.04629	3.0049	11.1532	0.270255	13.0112	20.4433	0.381329	0.106492	99.291		1.85041	0.0582829	0.1341	-	0.1341	0.0154923	0.0578346	0.0733269	0.279858	0.00866771	0.734464	0.82941	0.0279957	0.00318812		0.430686	0.381425	0.187889		1.84373	0.0559914	0.0294735		0.0279957		Undef
	AB	LH27-1	#128	48.6495	2.20533	2.84824	11.5297	0.222063	12.3523	20.3315	0.485047	0.191638	98.848		1.85636	0.0632974	0.12809	-	0.12809	0.0155502	0.0471491	0.0626994	0.305223	0.00717703	0.702652	0.83124	0.0358852	0.0057815		0.435421	0.368104	0.196475		1.83911	0.0717703	0.0375587		0.0358852		Undef
	AB	LH27-1	#129	46.9021	3.15492	2.72523	17.1789	0.362297	9.45518	18.8119	0.673974	bdl	99.297		1.82575	0.0923774	0.125028	-	0.125028	0.0492248	0.0401662	0.089391	0.46985	0.0119454	0.54869	0.78461	0.0508673	-		0.411973	0.28813	0.299896		1.80315	0.101735	0.0534072		0.0508673		Undef
	AB	LH27-1	#176	47.2223	2.84827	3.76599	10.9758	0.270463	11.8185	21.1449	0.483355	0.184384	98.714		1.80637	0.0819537	0.169783	-	0.169783	0.0238492	0.0599965	0.0838458	0.267271	0.00876298	0.673953	0.866638	0.0358485	0.00557644		0.455999	0.354652	0.189348		1.80786	0.0716971	0.0381457		0.0358485		Undef
	AB	LH27-1	#177	47.6486	2.40047	3.43274	11.8905	0.245737	11.845	20.5697	0.589094	0.13492	98.767		1.82193	0.069041	0.154696	-	0.154696	0.0233784	0.0795862	0.102965	0.277258	0.00795862	0.675189	0.842718	0.0436729	0.00407879		0.442106	0.354256	0.203637		1.79517	0.0873458	0.0463986		0.0436729		Undef
	AB	LH27-1	#199	47.2488	3.06218	4.03046	11.3851	0.261778	12.3414	19.7835	0.461474	0.14517	98.726		1.80584	0.0880337	0.181551	-	0.181551	0.0126118	0.0479051	0.0605169	0.303382	0.00847437	0.703173	0.810149	0.0341966	0.00438673		0.429616	0.372928	0.197457		1.8167	0.0683931	0.0362809		0.0341966		Undef
	AB	LH27-1	#76	47.8392	2.34084	3.34367	12.9115	0.340281	12.2716	20.0233	0.479747	0.155759	99.706		1.81505	0.0668042	0.149514	-	0.149514	0.03544	0.0819644	0.117404	0.292268	0.0109352	0.694088	0.813977	0.0352909	0.00467232		0.422028	0.359907	0.218064		1.80033	0.0705818	0.0377258		0.0352909		Undef
	AB	LH27-1	#77	47.2498	2.54462	3.91367	12.1441	0.327236	12.1553	20.2557	0.496298	0.251351	99.338		1.79667	0.0727815	0.175391	-	0.175391	0.0279393	0.0868009	0.11474	0.271439	0.0105394	0.689038	0.825255	0.0365896	0.00755655		0.431829	0.360591	0.20758		1.78573	0.0731792	0.0393667		0.0365896		Undef
	AB	LH27-1	#74	48.34	2.36429	3.38121	10.2212	0.322544	12.7418	21.1043	0.438975	0.102998	99.038		1.83296	0.0674336	0.151103	-	0.151103	0.015937	0.0613576	0.0772947	0.246825	0.0103591	0.720255	0.857413	0.0322725	0.0030878		0.448389	0.376702	0.174909		1.82449	0.064545	0.0341682		0.0322725		Undef
[truncated: 1 more columns]

## Sheet: S2b - CPX2
	Table S2b. Clinopyroxene: complete dataset for the EMPA, chemical formulae and thermobarometry results of CPX2 group from LHPCS lavas
	Rock Type	Sample	Spot																																					KD cpx-liq(Mg-Fe)		Predicted			Observed (Putirka et al. 1996)				T (°C)
		(thin section)		SiO2	TiO2	Al2O3	FeOtot	MnO	MgO	CaO	Na2O	Cr2O3	Total		Si	Ti	Al[IV]	Al[VI]	AlTot	Fe3+ [IV]	Fe3+ [VI]	Fe3+ Tot	Fe2+	Mn	Mg	Ca	Na	Cr		XWo	XEn	XFs		Q	J	J/(J+Q)		XAeg		[eq. 35]		XEnFs	XDiHd	XCaTs	XEnFs	XDiHd	XCaTs		[eq. 33]
				(wt%)											(apfu)																											[eq. 3.1a]	[eq. 3.2]	[eq. 3.4]
	TA	LH4	#82	50.1933	1.04792	3.15359	8.14739	0.208206	15.2172	20.701	0.363824	0.0946275	99.127		1.87055	0.0293752	0.12945	0.00906149	0.138511	-	0.0851382	0.0851382	0.168783	0.00657207	0.845407	0.826587	0.0262883	0.00278815		0.427715	0.437501	0.134784		1.84078	0.0525765	0.027769		0.0262883		0.263284		0.682504	0.0955973	0.0108857	0.773047	0.167068	0		1079.56
	TA	LH4	#83	49.9874	1.13161	3.20685	9.00675	0.221214	15.4936	19.9531	0.387936	0.091409	99.482		1.85756	0.0316308	0.140449	-	0.140449	0.00198936	0.104441	0.106431	0.173472	0.00696275	0.858308	0.79445	0.0279505	0.00268563		0.409573	0.442543	0.147884		1.82623	0.0559009	0.0297009		0.0279505		0.25932		0.681935	0.12111	0.0125829	0.737311	0.205547	0		1065.62
	TA	LH4	#120	48.6339	1.73561	5.17236	8.57475	0.148753	14.4506	20.6462	0.327684	0.071203	99.761		1.80648	0.0484927	0.193523	0.0329093	0.226432	-	0.085136	0.085136	0.181225	0.00467999	0.800179	0.821687	0.0235991	0.00209106		0.43407	0.422755	0.143175		1.80309	0.0471982	0.0255086		0.0235991		0.264225		0.669224	0.123495	0.0136809	0.724364	0.174899	0.0236678		1084.2
	TA	LH4	#122	49.5274	1.31538	3.94956	9.22121	0.234262	15.5385	19.3997	0.319463	0.145831	99.664		1.83805	0.0367192	0.161952	0.0107968	0.172749	-	0.0964251	0.0964251	0.189765	0.00736373	0.859666	0.771401	0.0229868	0.00427893		0.40079	0.446698	0.152512		1.82083	0.0459736	0.0246269		0.0229868		0.26433		0.6235	0.1399	0.0152191	0.70004	0.227578	0.00401318		1092.67
	TA	LH4	#123	48.7647	1.63419	4.95813	9.22905	0.227649	14.3517	20.2906	0.343931	0.0609701	99.863		1.81279	0.0456955	0.187212	0.0300157	0.217228	-	0.0888026	0.0888026	0.198113	0.00716792	0.795341	0.808183	0.0247891	0.00179198		0.42588	0.419158	0.154963		1.80164	0.0495781	0.0267814		0.0247891		0.264942		0.654343	0.127841	0.0142214	0.716375	0.18698	0.0201936		1089.76
	TA	LH4	#125	48.9122	1.58592	4.68413	10.0427	0.21789	14.2889	19.726	0.411097	0.0642767	99.933		1.8201	0.0443903	0.1799	0.0255294	0.205429	-	0.0933589	0.0933589	0.219164	0.00686755	0.792655	0.786484	0.0296599	0.00189106		0.414244	0.41754	0.168216		1.7983	0.0593197	0.0319331		0.0296599		0.267302		0.62256	0.133638	0.0152303	0.703124	0.20536	0.0115193		1104.51
	TA	LH4	#126	49.1019	1.46177	3.98599	8.57006	0.170559	14.7962	21.0985	0.325636	0.145499	99.656		1.825	0.0408671	0.174605	-	0.174605	0.000397733	0.112459	0.112857	0.153525	0.00536939	0.819827	0.840211	0.0234662	0.00427563		0.434922	0.424417	0.140661		1.81356	0.0469325	0.0252258		0.0234662		0.260668		0.705689	0.101276	0.0110266	0.767192	0.164665	0		1065.99
	TA	LH4	#127	50.8008	0.995296	3.09385	8.43367	0.244817	15.5211	20.2355	0.350018	0.183931	99.859		1.87977	0.0277023	0.120226	0.0146982	0.134924	-	0.0698538	0.0698538	0.191126	0.00767295	0.856182	0.802272	0.0251115	0.00538103		0.416292	0.444314	0.139395		1.84958	0.050223	0.0264359		0.0251115		0.264548		0.656982	0.107891	0.0122613	0.749035	0.187334	0.00123651		1088.94
	TA	LH4	#129	49.3901	1.39894	3.76851	10.4015	0.2491	15.2191	18.7397	0.341615	0.114852	99.661		1.84015	0.039205	0.159855	0.00562203	0.165477	-	0.0971168	0.0971168	0.226971	0.00786089	0.845295	0.748078	0.0246772	0.00338317		0.388532	0.439071	0.172397		1.82034	0.0493545	0.026397		0.0246772		0.264209		0.603383	0.154638	0.0165331	0.680309	0.249396	0		1094.42
	TA	LH4	#133	48.4929	1.70282	4.92464	9.95215	0.2088	15.2516	18.7993	0.384211	0.0982866	99.842		1.79913	0.0475208	0.20087	0.014465	0.215335	-	0.116118	0.116118	0.192668	0.00656145	0.843544	0.74731	0.0276376	0.00288306		0.392026	0.442557	0.165417		1.78352	0.0552753	0.0300606		0.0276376		0.267267		0.580469	0.166375	0.0183116	0.658462	0.252627	0.00645931		1109.76
	TA	LH4	#140	48.482	1.78545	4.94171	9.67068	0.230575	14.7318	19.4459	0.365657	0.118432	99.789		1.80309	0.0499478	0.196906	0.0197005	0.216606	-	0.100194	0.100194	0.200587	0.00726332	0.816775	0.774887	0.0263668	0.00348241		0.407882	0.429978	0.162139		1.79225	0.0527337	0.0285822		0.0263668		0.266239		0.615773	0.148798	0.0164433	0.68378	0.22163	0.010252		1100.94
	TA	LH4	#141	48.6727	1.58733	4.74581	9.45421	0.274361	15.2694	18.7695	0.362325	0.212841	99.359		1.8135	0.0444865	0.186505	0.0218949	0.2084	-	0.0955414	0.0955414	0.199045	0.00865844	0.848129	0.749303	0.0261744	0.0062699		0.394214	0.446255	0.159531		1.79648	0.0523487	0.0283146		0.0261744		0.266562		0.591415	0.16614	0.0181216	0.66034	0.245797	0.0118221		1105.24
	TA	LH4	#164	50.494	0.966423	3.07715	7.68847	0.262857	15.4224	20.9321	0.368012	0.152674	99.364		1.87443	0.0269853	0.125566	0.00906149	0.134628	-	0.0845407	0.0845407	0.154145	0.00826487	0.853473	0.832562	0.0264874	0.00448096		0.430695	0.441561	0.127744		1.84018	0.0529749	0.0279823		0.0264874		0.263126		0.68904	0.0920023	0.0105171	0.780079	0.159914	0		1077.56
	TA	LH4	#165	50.3964	0.923857	2.95497	7.47219	0.16789	15.8491	20.9372	0.369487	0.17986	99.251		1.86854	0.0257654	0.129125	-	0.129125	0.00233779	0.101221	0.103559	0.128131	0.00527245	0.876023	0.831754	0.0265612	0.00527245		0.427676	0.450488	0.121836		1.83591	0.0531224	0.0281215		0.0265612		0.258049		0.724643	0.0972649	0.010274	0.778737	0.169309	0		1054.52
	TA	LH4	#166	50.2341	0.928537	2.82685	7.55489	0.195882	15.8217	20.957	0.378174	0.165848	99.063		1.86651	0.0259514	0.123791	-	0.123791	0.0096945	0.103955	0.113649	0.121107	0.00616471	0.876383	0.834323	0.027244	0.00487211		0.427483	0.449082	0.123435		1.83181	0.0544881	0.0288862		0.027244		0.252551		0.776233	0.100833	0.00978045	0.782022	0.16987	0		1028.72
	TA	LH4	#180	51.373	1.3559	2.61418	14.3735	0.377271	13.8383	15.7247	0.494439	bdl	100.328		1.93012	0.0383182	0.0698832	0.0458718	0.115755	-	-	-	0.451615	0.0120057	0.775068	0.633001	0.0360171	-		0.338186	0.414133	0.247681		1.85968	0.0720342	0.0372902		0.0360171		0.271601		0.493484	0.213311	0.0238701	0.592352	0.316669	0.00823074		1137.85
	TA	LH4	#191	53.1423	0.527451	1.88698	18.8087	0.57675	19.8389	5.02533	0.396728	bdl	100.311		1.97102	0.0147151	0.0289797	0.0535048	0.0824845	-	-	-	0.583398	0.0181186	1.09692	0.199705	0.0285292	-		0.105205	0.577928	0.316866		1.88003	0.0570585	0.0294558		0.0285292		0.284017		0.104465	0.562168	0.0626227	0.172435	0.752523	0.0215524		1204.09
	TA	LH4	#196	52.4221	0.915014	2.21408	13.1713	0.326316	16.1082	15.1007	0.521297	0.0582636	101.107		1.93074	0.0253493	0.0692615	0.0268463	0.0961078	-	0.0272455	0.0272455	0.378443	0.0101796	0.884431	0.595908	0.0372255	0.00169661		0.314251	0.466453	0.219296		1.85878	0.0744511	0.0385112		0.0272455		0.271333		0.445753	0.238799	0.026164	0.565637	0.364394	0		1140.19
	TA	LH4	#212	50.094	1.88532	2.80537	14.4754	0.411556	12.7758	16.9597	0.588407	bdl	100.11		1.89453	0.053633	0.105468	0.0195755	0.125044	-	0.0210737	0.0210737	0.436754	0.0131835	0.7203	0.687241	0.0431461	-		0.365825	0.383464	0.250711		1.84429	0.0862921	0.0446974		0.0210737		0.265787		0.571082	0.186356	0.0197604	0.637633	0.2715	0		1103.76
	TA	LH13	#9	52.0229	0.700053	2.03462	8.96051	0.270994	15.3571	20.6362	0.324515	bdl	100.307		1.92136	0.019448	0.0786396	0.00992345	0.0885631	-	0.0530581	0.0530581	0.223702	0.00847732	0.845538	0.816616	0.0232378	-		0.419321	0.43422	0.146458		1.88586	0.0464757	0.0240516		0.0232378		0.267639		0.580871	0.0748214	0.00838647	0.785189	0.171047	0		1049.09
	TA	LH13	#25	51.5662	0.586914	2.27719	6.62766	0.20658	16.8384	20.2775	0.270737	0.27919	98.943		1.90987	0.0163509	0.0901296	0.00927218	0.0994018	-	0.0594217	0.0594217	0.145862	0.00648056	0.929711	0.804686	0.0194417	0.00817547		0.413454	0.477745	0.108801		1.88026	0.0388833	0.0202608		0.0194417		0.268289		0.565352	0.0835389	0.00928101	0.764358	0.188171	0		1054.54
	TA	LH13	#26	50.8487	0.739271	2.21393	8.48108	0.176755	15.758	20.5875	0.308867	0.060865	99.175		1.89287	0.0207001	0.0971313	-	0.0971313	0.0100017	0.0862339	0.0962357	0.16779	0.00557311	0.874481	0.821138	0.0222924	0.00179136		0.417818	0.445009	0.137173		1.86341	0.0445849	0.0233674		0.0222924		Undef
	TA	LH13	#55	48.9112	1.24846	3.28093	9.04939	0.229817	14.3279	20.7526	0.386664	bdl	98.187		1.84877	0.0354959	0.14616	-	0.14616	0.00507084	0.108576	0.113647	0.172409	0.00735769	0.807358	0.840467	0.0283371	-		0.432938	0.415928	0.151134		1.82023	0.0566741	0.0301955		0.0283371		0.264159		0.610663	0.0786701	0.00835516	0.781726	0.161071	0		1030.96
	TA	LH13	#56	49.9947	0.924055	2.66623	9.89777	0.299542	14.6683	19.8808	0.328505	bdl	98.664		1.88351	0.0261861	0.116493	0.00189177	0.118385	-	0.0862249	0.0862249	0.225619	0.00955842	0.823816	0.802509	0.0239956	-		0.412008	0.422993	0.164999		1.85194	0.0479912	0.0252594		0.0239956		0.266425		0.573256	0.0884844	0.00950786	0.756916	0.193491	0		1046.4
	TA	LH13	#62	51.7235	0.508399	2.50373	5.7727	0.198527	16.6467	21.5311	0.246196	0.511124	99.659		1.90087	0.014054	0.0991254	0.00931948	0.108445	-	0.0643891	0.0643891	0.11303	0.00617976	0.912013	0.847823	0.0175425	0.0148514		0.43623	0.469308	0.0944621		1.87287	0.0350851	0.0183889		0.0175425		0.266633		0.601601	0.0696333	0.00779029	0.799289	0.148047	0.0026563		1040.29
	TA	LH13	#63	51.7522	0.533906	2.63392	5.5517	0.169794	16.706	21.4609	0.229525	0.531973	99.589		1.90206	0.0147601	0.0979356	0.0161564	0.114092	-	0.0531565	0.0531565	0.117483	0.00528573	0.915329	0.845118	0.0163558	0.0154583		0.436424	0.472732	0.0908441		1.87793	0.0327117	0.0171208		0.0163558		0.265896		0.605827	0.0730299	0.00803102	0.792089	0.149396	0.00884996		1036.94
	TA	LH13	#64	51.032	0.766663	2.57169	8.07598	0.190003	15.6389	20.6827	0.302965	0.0780276	99.339		1.89573	0.0214223	0.104272	0.00831984	0.112592	-	0.0726367	0.0726367	0.178254	0.00597833	0.866061	0.823216	0.0218209	0.00229169		0.42298	0.445043	0.131976		1.86753	0.0436418	0.0228351		0.0218209		0.268743		0.573583	0.0760064	0.00862084	0.780713	0.17152	0		1054.26
	TA	LH13	#73	50.9283	0.746566	2.38692	8.38727	0.220999	15.9234	20.1134	0.271705	0.0744091	99.053		1.89715	0.0209189	0.102851	0.00194247	0.104794	-	0.0765035	0.0765035	0.184784	0.00697298	0.884273	0.802789	0.019624	0.00219151		0.410549	0.452269	0.137182		1.87185	0.0392479	0.0205369		0.019624		0.265114		0.580084	0.087336	0.00924185	0.761498	0.195707	0		1040.78
	TA	LH13	#74	50.5441	0.956597	2.65239	9.3083	0.286319	15.1791	19.9255	0.303767	bdl	99.156		1.8898	0.0269031	0.110203	0.00667597	0.116879	-	0.0717417	0.0717417	0.21931	0.00906736	0.846054	0.798226	0.0220207	-		0.410509	0.435154	0.154337		1.86359	0.0440415	0.023087		0.0220207		0.268064		0.561831	0.0887535	0.00973861	0.753609	0.195168	0		1054.3
	TA	LH13	#75	51.8953	0.640538	2.01435	8.14946	0.206561	16.0587	20.248	0.263771	bdl	99.52		1.92334	0.0178567	0.0766641	0.0113225	0.0879866	-	0.0476844	0.0476844	0.204903	0.00648428	0.887248	0.80405	0.018954	-		0.412237	0.454943	0.13282		1.8962	0.0379081	0.0195998		0.018954		0.267953		0.568839	0.0802448	0.00893252	0.772192	0.186124	0.000417471		1052.84
	TA	LH13	#181	51.2555	0.860651	2.62109	9.17685	0.215657	15.0188	20.4151	0.28956	bdl	99.907		1.90315	0.0240375	0.0968482	0.0178536	0.114702	-	0.0508677	0.0508677	0.234091	0.00678237	0.831339	0.812188	0.0208458	-		0.419661	0.429603	0.150736		1.87762	0.0416916	0.0217222		0.0208458		0.269162		0.567783	0.0812	0.00916416	0.768138	0.176507	0.00569342		1056.77
	TA	LH13	#171	51.7129	0.524092	2.37579	6.0958	0.17852	17.2756	19.9816	0.300809	0.498612	98.95		1.9099	0.0145596	0.0901	0.0133131	0.103413	-	0.0546484	0.0546484	0.133629	0.0055845	0.951161	0.790706	0.0215402	0.0145596		0.40846	0.491401	0.10014		1.8755	0.0430805	0.0224544		0.0215402		0.269913		0.547795	0.090969	0.0101828	0.745905	0.199387	0.000935536		1063.56
	TA	LH13	#172	51.6974	0.567801	2.11505	6.98605	0.225165	16.4257	20.2014	0.297865	0.414489	98.931		1.92028	0.0158643	0.0797206	0.012871	0.0925917	-	0.0444001	0.0444001	0.172612	0.00708406	0.909554	0.803991	0.0214517	0.0121726		0.414914	0.469443	0.115643		1.88616	0.0429035	0.0222406		0.0214517		0.268874		0.565212	0.0830109	0.00930164	0.764574	0.183088	0		1056.46
	TA	LH13	#173	52.1335	0.479109	2.45773	5.63774	0.214339	17.5219	19.8092	0.257148	0.507223	99.02		1.92136	0.0132817	0.0786419	0.0281113	0.106753	-	0.0275621	0.0275621	0.146199	0.0066908	0.962676	0.782224	0.0183747	0.0147797		0.406256	0.50003	0.0937147		1.8911	0.0367495	0.0190624		0.0183747		0.268195		0.555116	0.0992923	0.0107231	0.732334	0.203365	0.0143806		1055.55
	TA	LH13	#175	51.3877	0.581057	2.69664	6.9974	0.226155	16.7621	19.7715	0.296391	0.545982	99.265		1.89929	0.016154	0.100713	0.0167523	0.117465	-	0.0569377	0.0569377	0.159346	0.00707982	0.923568	0.782969	0.0212395	0.0159545		0.405685	0.478587	0.115727		1.86588	0.0424789	0.0222594		0.0212395		0.27		0.541517	0.0986606	0.0109161	0.730344	0.207471	0.00502682		1064.75
	TA	LH13	#180	51.5588	0.712999	2.98872	5.92963	0.175002	16.9809	19.6547	0.241862	0.378367	98.621		1.91195	0.0198881	0.0880472	0.0425745	0.130622	-	0.0119928	0.0119928	0.171897	0.0054967	0.938737	0.780931	0.0173896	0.0110933		0.409047	0.491758	0.0991945		1.89157	0.0347791	0.0180545		0.0119928		0.267732		0.558828	0.106637	0.0113196	0.719488	0.202131	0.0272113		1052.74
	TA	LH13	#181	50.4498	0.66733	3.11136	5.56946	0.180909	16.3537	19.8466	0.22483	0.304077	96.708		1.90826	0.0189867	0.0917358	0.0469671	0.138703	-	0.0141901	0.0141901	0.161987	0.00579594	0.922154	0.804337	0.0164885	0.00909363		0.421438	0.483222	0.095341		1.88848	0.0329769	0.0171625		0.0141901		0.26677		0.580497	0.0968593	0.0103076	0.739558	0.180037	0.032883		1045.22
	TA	LH13	#182	51.0039	0.678498	3.2865	5.8072	0.196621	16.5211	20.4194	0.235519	0.31596	98.471		1.89548	0.0189668	0.104517	0.039431	0.143948	-	0.034839	0.034839	0.145645	0.00618917	0.915298	0.813077	0.0169703	0.00928375		0.424552	0.47798	0.0974676		1.87402	0.0339406	0.0177889		0.0169703		0.267012		0.581694	0.0927976	0.00997373	0.747134	0.175933	0.0284007		1045.87
	TA	LH13	#183	51.422	0.614037	1.91442	8.23676	0.300857	16.0699	19.1828	0.288875	bdl	98.033		1.93396	0.0173709	0.0660394	0.0188185	0.0848579	-	0.033444	0.033444	0.225622	0.00958395	0.900991	0.773005	0.0210647	-		0.397896	0.463826	0.138278		1.89962	0.0421294	0.0216967		0.0210647		0.269667		0.541522	0.0925259	0.0102971	0.74313	0.210085	0.00333717		1063.97
	TA	LH13	#184	51.2272	0.686885	1.87945	8.20901	0.272153	15.8645	19.4666	0.311578	bdl	97.951		1.92959	0.0194616	0.0704109	0.0130243	0.0834352	-	0.0402206	0.0402206	0.218369	0.00868285	0.890841	0.785648	0.0227551	-		0.404172	0.458338	0.13749		1.89486	0.0455101	0.0234544		0.0227551		0.268681		0.555545	0.0872071	0.00967244	0.755829	0.198733	0		1057.88
	TA	LH13	#185	51.7866	0.650041	2.1333	7.75093	0.182962	15.7633	19.9721	0.281127	0.0946242	98.615		1.93694	0.0182881	0.063059	0.0309799	0.0940389	-	0.0130915	0.0130915	0.229351	0.00579623	0.878929	0.80038	0.0203867	0.00279818		0.415214	0.456013	0.128773		1.90866	0.0407735	0.0209156		0.0130915		0.268936		0.567016	0.0836888	0.00937309	0.762987	0.179804	0.0127892		1056.13
	TA	LH13	#256	50.4269	0.762735	2.95443	7.19864	0.115494	16.0663	19.3877	0.283635	0.0869444	97.289		1.90378	0.0216599	0.096222	0.0352348	0.131457	-	0.0358337	0.0358337	0.191446	0.00369317	0.904227	0.784249	0.0207616	0.0025952		0.408562	0.471117	0.120321		1.87992	0.0415232	0.0216104		0.0207616		0.269713		0.546707	0.0992024	0.0109265	0.729801	0.202561	0.0205575		1062.58
	TA	LH15	#36	48.7311	1.5506	4.32907	9.79776	0.138332	14.5902	19.9323	0.31177	0.053889	99.435		1.82062	0.0435756	0.179376	0.0112421	0.190618	-	0.101975	0.101975	0.204149	0.00437746	0.812615	0.797891	0.0225837	0.0015918		0.415335	0.423045	0.16162		1.81465	0.0451674	0.0242859		0.0225837		0.264418		0.648789	0.0973069	0.0202218	0.719189	0.204569	0.00570296		1112.7
	TA	LH15	#37	50.4047	0.901116	3.212	8.42858	0.199271	16.4294	19.0159	0.263922	0.132154	98.987		1.87432	0.0252049	0.125676	0.015093	0.140769	-	0.0753157	0.0753157	0.186795	0.00627631	0.910762	0.75764	0.0190282	0.00388533		0.391166	0.470274	0.13856		1.8552	0.0380563	0.020101		0.0190282		0.262705		0.627576	0.10979	0.0218763	0.699215	0.240532	0.00867218		1108.65
	TA	LH15	#45	51.8032	0.9534	3.05399	7.44387	0.173843	15.8438	21.1025	0.248929	0.103465	100.727		1.89606	0.0262482	0.103945	0.0277951	0.13174	-	0.0383243	0.0383243	0.189526	0.00538936	0.864493	0.827566	0.0176651	0.00299409		0.429819	0.449047	0.121133		1.88158	0.0353302	0.0184308		0.0176651		0.260649		0.713526	0.0759585	0.0155903	0.771495	0.162174	0.0165705		1087.23
	TA	LH15	#61	50.3362	0.987973	3.16862	8.37801	0.183051	15.2814	20.5532	0.256446	bdl	99.182		1.87639	0.0277023	0.123614	0.015595	0.139209	-	0.0700531	0.0700531	0.191126	0.00577963	0.849207	0.820906	0.0185347	-		0.42377	0.438427	0.137803		1.86124	0.0370693	0.0195276		0.0185347		0.261347		0.696579	0.0784913	0.0161825	0.764484	0.176211	0.00878738		1093.32
	TA	LH15	#62	50.5708	1.08558	3.04624	8.14747	0.224421	15.2185	20.587	0.325879	0.0677246	99.282		1.88306	0.0304057	0.116937	0.0167481	0.133686	-	0.0609112	0.0609112	0.192802	0.00707806	0.844781	0.821354	0.0235271	0.00199382		0.426233	0.438438	0.135328		1.85894	0.0470541	0.0246875		0.0235271		0.264067		0.681583	0.0745094	0.0160709	0.769207	0.167464	0.00345722		1105.7
	TA	LH15	#102	51.3662	0.946004	2.75022	7.92318	0.175689	15.6392	20.8959	0.318167	0.150572	100.18		1.89277	0.0262207	0.107226	0.0122131	0.119439	-	0.0609157	0.0609157	0.183246	0.00548341	0.859101	0.825004	0.0227312	0.00438673		0.426616	0.444297	0.129087		1.86735	0.0454625	0.0237673		0.0227312		0.263393		0.688522	0.0712206	0.0153309	0.778329	0.165314	0		1102.08
	TA	LH15	#135	50.501	1.0478	3.14671	7.90744	0.168895	15.4243	21.5261	0.324366	0.102417	100.149		1.86141	0.0290504	0.136696	-	0.136696	0.00189027	0.100681	0.102572	0.141173	0.00527284	0.847535	0.850122	0.0231806	0.00298463		0.436687	0.435406	0.127908		1.83883	0.0463612	0.0245923		0.0231806		0.258628		0.738247	0.0677367	0.0137614	0.794677	0.153006	0		1075.9
	TA	LH15	#188	52.6608	0.753299	3.09729	16.4436	0.385948	18.7433	8.22497	0.62524	bdl	100.996		1.93257	0.0207943	0.0674315	0.0665317	0.133963	-	0.00349904	0.00349904	0.501162	0.0119967	1.02542	0.323411	0.0444878	-		0.173357	0.549713	0.276929		1.84999	0.0889755	0.0458881		0.00349904		0.284248		0.180198	0.365644	0.0787593	0.27866	0.626086	0.0230385		1239.75
	TA	LH15	#14	47.1364	0.75865	1.15717	18.4958	0.479028	21.8402	8.26501	0.189015	bdl	98.3212		1.76565	0.0213757	0.0510859	-	0.0510859	0.183262	0.204344	0.387606	0.191793	0.0151983	1.21959	0.331715	0.0137275	-		0.154573	0.568369	0.277058		1.7431	0.027455	0.0155065		0.0137275		Undef
	TA	LH15	#78	51.8658	1.15068	3.44737	10.2326	0.25625	13.2774	17.3667	0.420474	0.0636084	98.419		1.97083	0.0328891	0.0291677	0.12522	0.154388	-	-	-	0.32517	0.00824742	0.752125	0.707066	0.0309781	0.00191099		0.39442	0.419601	0.18598		1.78436	0.0619562	0.0335567		0.0309781		0.269644		0.599041	0.145219	0.030348	0.6252	0.220874	0.0741284		1139.52
	TA	LH17	#240	50.4163	1.03304	3.6743	7.41071	0.184755	15.525	20.7496	0.324238	0.505058	99.823		1.86241	0.0287046	0.137593	0.0223756	0.159968	-	0.0662796	0.0662796	0.162659	0.00578078	0.854957	0.821269	0.0232228	0.014751		0.429753	0.44743	0.122818		1.83889	0.0464456	0.0246352		0.0232228		0.266445		0.671517	0.107163	0.0133188	0.749662	0.170127	0.0102567		1098.77
	TA	LH17	#244	50.5614	0.872784	3.10801	6.73194	0.139199	15.5805	21.0351	0.328927	0.562605	98.954		1.88102	0.0244237	0.118978	0.017296	0.136274	-	0.0600125	0.0600125	0.149433	0.00438629	0.8641	0.83848	0.0237259	0.0165483		0.437507	0.450924	0.111569		1.85201	0.0474517	0.0249816		0.0237259		0.266255		0.68685	0.0918652	0.0116677	0.777926	0.15058	0.00385841		1094.61
	TA	LH17	#256	50.4014	1.17424	3.40403	9.97945	0.32666	15.3047	17.6069	0.373225	0.188435	98.807		1.89242	0.0331635	0.107582	0.0430526	0.150634	-	0.0197782	0.0197782	0.293577	0.0103886	0.856658	0.708321	0.0271701	0.00559385		0.375011	0.453596	0.171393		1.85856	0.0543402	0.0284073		0.0197782		0.270086		0.56621	0.174492	0.0210595	0.644978	0.263596	0.0195982		1129.02
	TA	LH17	#265	49.6054	1.3218	4.28398	7.99854	0.196168	15.5284	19.652	0.29303	0.288115	99.18		1.84542	0.0369881	0.154582	0.0332494	0.187832	-	0.0600184	0.0600184	0.188829	0.0061813	0.861195	0.78333	0.0211361	0.00847437		0.412358	0.453397	0.134245		1.83335	0.0422721	0.0225376		0.0211361		0.266147		0.642829	0.139862	0.0166057	0.699278	0.2082	0.0223294		1102.35
	TA	LH17	#271	50.2773	0.945644	3.31374	7.06119	0.199649	15.5189	21.2539	0.300417	0.373447	99.301		1.86513	0.0263872	0.134873	0.0100072	0.144881	-	0.0827463	0.0827463	0.136317	0.00627318	0.858231	0.844789	0.0216076	0.0109532		0.438069	0.445088	0.116843		1.83934	0.0432153	0.0229557		0.0216076		0.265087		0.695799	0.0900714	0.0112991	0.783252	0.150884	0.00265811		1088.94
	TA	LH17	#276	54.2524	1.04787	3.53528	11.0077	0.298424	13.2381	16.1586	0.64203	bdl	100.896		2.01199	0.0292309	-	0.154521	0.154521	-	-	-	0.341397	0.00937406	0.731882	0.642072	0.0461647	-		0.372262	0.424378	0.20336		1.71535	0.0923294	0.0510762		0.0461647		0.278564		0.524653	0.246322	0.0312546	0.540661	0.259289	0.092614		1169.84
	TA	LH17	#315	51.7641	0.772227	2.09463	9.47	0.333368	15.1004	20.1365	0.389744	bdl	100.061		1.91972	0.0215418	0.0802832	0.0112696	0.0915528	-	0.0539543	0.0539543	0.239753	0.0104717	0.834846	0.80014	0.0280243	-		0.412605	0.430549	0.156847		1.87474	0.0560487	0.0290289		0.0280243		0.264529		0.676188	0.0986627	0.0121104	0.767947	0.182852	0		1092.06
	TA	LH17	#318	51.1287	0.973658	3.0956	7.61353	0.232918	15.3402	21.051	0.347072	0.276871	100.068		1.88666	0.027025	0.113335	0.0212909	0.134626	-	0.0547481	0.0547481	0.1802	0.0072798	0.843858	0.83229	0.0248311	0.00807758		0.433833	0.439911	0.126256		1.85635	0.0496622	0.0260556		0.0248311		0.266806		0.680685	0.0919344	0.01176	0.776924	0.153431	0.00567745		1098.02
	TA	LH17	#319	50.7466	0.968479	2.89895	7.48946	0.161858	15.4732	21.1522	0.331361	0.312798	99.537		1.88098	0.0270021	0.119019	0.00762237	0.126641	-	0.0720389	0.0720389	0.16012	0.00508158	0.855001	0.840055	0.0238137	0.00916677		0.434726	0.442509	0.122765		1.85517	0.0476274	0.0250301		0.0238137		0.263897		0.703526	0.0892595	0.0110359	0.786703	0.153515	0		1083.65
	TA	LH17	#320	51.194	0.915439	2.94198	7.72167	0.156832	15.6319	21.2282	0.329982	0.27088	100.391		1.88139	0.0253057	0.118608	0.00881716	0.127425	-	0.0748213	0.0748213	0.162495	0.00488182	0.85641	0.835886	0.0235124	0.00787068		0.432077	0.442735	0.125188		1.85479	0.0470248	0.0247263		0.0235124		0.264892		0.692054	0.0899631	0.0112583	0.783769	0.15841	0		1089.6
	TA	LH17	#321	50.9877	0.958516	2.92815	7.94968	0.108395	15.4945	21.0164	0.356542	0.245909	100.067		1.88096	0.0265976	0.119042	0.00826817	0.12731	-	0.0759078	0.0759078	0.169348	0.00338696	0.852119	0.830702	0.0255018	0.00717239		0.430071	0.441208	0.128721		1.85217	0.0510036	0.0267993		0.0255018		0.264854		0.689219	0.0924599	0.0115152	0.778996	0.162729	0		1090.15
	TA	LH17	#342	50.3755	1.36989	2.88474	13.2904	0.357996	16.1822	15.5476	0.363994	bdl	100.458		1.86917	0.0382337	0.126151	-	0.126151	0.00467964	0.0794544	0.084134	0.328272	0.0112511	0.895106	0.618111	0.0261861	-		0.319116	0.462172	0.218713		1.84149	0.0523722	0.0276536		0.0261861		0.25959		0.499092	0.281931	0.0274309	0.563408	0.376795	0		1083.79
	TA	LH17	#349	52.6489	1.03716	3.16853	11.6869	0.31883	15.3227	16.3292	0.752691	bdl	101.37		1.92991	0.0285971	0.070093	0.0667933	0.136886	-	-0.00139986	-0.00139986	0.359664	0.00989901	0.837316	0.641336	0.0534947	-		0.347252	0.453415	0.199332		1.83832	0.106989	0.0549987		-0.00139986		0.279285		0.486833	0.193904	0.0257639	0.599235	0.298267	0.0136176		1182.22
	TA	LH17	#29	50.8752	0.795216	4.12563	8.99627	0.251094	14.6284	17.4675	0.758247	0.221922	98.182		1.91403	0.0225039	0.085965	0.096967	0.182932	-	-	-	0.28305	0.0080014	0.820444	0.704123	0.0553097	0.00660116		0.387799	0.451912	0.160289		1.80762	0.110619	0.0576672		0.0553097		0.278937		0.544371	0.165639	0.0224673	0.636783	0.233157	0.0409262		1172.69
	TA	LH17	#32	51.3355	0.650961	2.52454	6.6325	0.176903	15.87	20.8195	0.376747	0.115064	98.508		1.91386	0.0182548	0.0861368	0.0247886	0.110925	-	0.0486795	0.0486795	0.158109	0.00558617	0.882017	0.831642	0.0272326	0.00339161		0.431771	0.457975	0.110255		1.87177	0.0544652	0.0282755		0.0272326		0.267684		0.675711	0.0841198	0.0110373	0.791329	0.150969	0.00574284		1102.43
	TA	LH21-2	#15	51.832	0.890956	2.29736	14.7367	0.467109	17.2363	12.5096	0.360922	0.0476584	100.425		1.92282	0.0248615	0.0771804	0.0232639	0.100444	-	0.0287554	0.0287554	0.428436	0.0146773	0.953223	0.497229	0.0259598	0.00139783		0.25865	0.495904	0.245446		1.87889	0.0519195	0.0268901		0.0259598		0.273035		0.327429	0.368755	0.0352511	0.460476	0.476793	0.00246938		1145.87
	TA	LH21-2	#50	48.4197	2.49719	3.42916	14.1013	0.416391	11.857	17.9651	0.610386	bdl	99.47		1.8479	0.0716867	0.152098	0.00214362	0.154241	-	0.0514469	0.0514469	0.398614	0.01346	0.674593	0.734615	0.0451656	-		0.392259	0.360249	0.247492		1.80782	0.0903313	0.047589		0.0451656		0.259526		0.661081	0.187245	0.0166611	0.666669	0.231791	0		1061.5
	TA	LH21-2	#59	49.543	1.5947	3.92862	11.3887	0.229738	15.2738	16.8999	0.360206	0.209032	99.482		1.85378	0.0448833	0.14622	0.0270297	0.17325	-	0.0493716	0.0493716	0.307002	0.00728107	0.851985	0.677538	0.0261321	0.00618392		0.35787	0.45006	0.19207		1.83653	0.0522641	0.0276707		0.0261321		0.269855		0.518937	0.222973	0.0221616	0.603501	0.305056	0.00960043		1120.28
	TA	LH21-2	#26	50.2283	0.91219	1.69952	10.2968	0.336495	15.6011	18.9505	0.315778	0.160217	98.503		1.89331	0.0258636	0.0755017	-	0.0755017	0.0311855	0.0732635	0.104449	0.220139	0.0107433	0.876676	0.765363	0.0230783	0.00477481		0.387046	0.443385	0.169569		1.86218	0.0461565	0.0241868		0.0230783		Undef
	TA	LH21-2	#5	49.9521	1.69546	2.35314	11.8193	0.297379	14.7566	18.1831	0.382899	0.0670699	99.532		1.8771	0.0479239	0.104217	-	0.104217	0.0186813	0.0529554	0.0716367	0.299798	0.00946522	0.826662	0.732109	0.0278975	0.00199268		0.377426	0.426217	0.196357		1.85857	0.055795	0.0291454		0.0278975		Undef
	TA	LH21-2	#9	49.8703	1.49745	2.32743	11.0792	0.303513	14.9673	18.7667	0.373171	0.0871546	99.293		1.87304	0.0423043	0.103024	-	0.103024	0.0239393	0.0669404	0.0908797	0.257111	0.00965534	0.838024	0.755207	0.0271743	0.00258803		0.387097	0.429593	0.18331		1.85034	0.0543486	0.0285341		0.0271743		Undef
	TA	LH21-2	#10	50.787	1.17866	2.24085	10.8288	0.262472	15.7106	18.3941	0.326029	0.23037	99.963		1.88902	0.0329763	0.0982316	-	0.0982316	0.0127522	0.0617684	0.0745205	0.262316	0.00826899	0.871133	0.733051	0.0235118	0.0067746		0.376045	0.446929	0.177026		1.8665	0.0470237	0.0245744		0.0235118		Undef
	TA	LH21-2	#12	49.7058	1.59757	2.33792	13.0969	0.371874	15.2446	16.7763	0.312625	0.0903906	99.563		1.86958	0.0451989	0.103639	-	0.103639	0.0267808	0.0601324	0.0869132	0.325054	0.0118473	0.854796	0.676091	0.0227985	0.00268804		0.345867	0.437334	0.216799		1.85594	0.0455971	0.0239791		0.0227985		Undef
	TA	LH21-2	#17	49.4716	1.60157	2.64638	11.4798	0.20631	14.4446	19.0003	0.468393	0.0971149	99.443		1.85842	0.0452545	0.117164	-	0.117164	0.0244175	0.0823035	0.106721	0.253922	0.00656439	0.808912	0.764751	0.0341149	0.00288435		0.394011	0.416808	0.189181		1.82759	0.0682299	0.0359897		0.0341149		Undef
	TA	LH21-2	#49	49.0687	1.81993	2.83904	12.4784	0.245541	13.8007	18.5652	0.419559	bdl	99.313		1.85541	0.0517632	0.126521	-	0.126521	0.0180673	0.0707264	0.0887938	0.305801	0.00786402	0.777941	0.752159	0.0307593	-		0.389191	0.402575	0.208234		1.8359	0.0615186	0.0324222		0.0307593		Undef
	TA	LH21-2	#53	49.7512	1.69503	2.72256	12.2665	0.338691	14.0851	18.7122	0.405518	0.0604733	100.056		1.86535	0.047804	0.120307	-	0.120307	0.0143412	0.0667264	0.0810676	0.303555	0.0107559	0.787272	0.751718	0.0294791	0.00179265		0.388598	0.407022	0.20438		1.84255	0.0589583	0.0310061		0.0294791		Undef
	TA	LH21-2	#62	50.1763	1.58255	2.35296	11.8121	0.325527	14.6576	18.1199	0.373298	0.083831	99.484		1.88722	0.0447724	0.104303	-	0.104303	0.00847584	0.0479633	0.0564391	0.315102	0.0103704	0.821858	0.730219	0.0272224	0.0024929		0.377558	0.424986	0.197457		1.86718	0.0544448	0.0283327		0.0272224		0.231248		0.928588	0.252679	0.0137372	0.680487	0.259276	0		939.714
	TA	LH21-2	#63	49.0959	1.94952	2.59103	12.3403	0.276138	13.0785	19.5531	0.468977	bdl	99.406		1.85992	0.0555528	0.115685	-	0.115685	0.0243915	0.0630196	0.087411	0.303549	0.00886057	0.738613	0.793668	0.0344467	-		0.410767	0.382314	0.206919		1.83583	0.0688934	0.0361698		0.0344467		Undef
	TA	LH26-1	#17	50.9608	0.811694	2.60391	8.88308	0.269916	15.8734	20.0421	0.32045	bdl	99.796		1.88602	0.0225961	0.113578	-	0.113578	0.000398168	0.0908819	0.0912801	0.183655	0.00846108	0.875771	0.794744	0.0229942	-		0.406728	0.448245	0.145027		1.85417	0.0459885	0.0242024		0.0229942		0.262603		0.58031	0.0912241	0.00941149	0.750625	0.204451	0		1031.37
	TA	LH26-1	#27	50.7493	0.699768	2.89724	7.36238	0.159343	16.4373	20.847	0.27844	0.249228	99.68		1.86991	0.0193943	0.125814	-	0.125814	0.00427669	0.103934	0.10821	0.118653	0.0049729	0.902879	0.823015	0.0198916	0.00726043		0.420374	0.461217	0.11841		1.84455	0.0397832	0.0211126		0.0198916		0.26145		0.60317	0.0826799	0.0085272	0.770303	0.18486	0		1023.6
	TA	LH26-1	#29	50.7505	0.865137	2.53944	9.30233	0.21271	15.2927	20.8884	0.303736	bdl	100.188		1.87698	0.0240676	0.110691	-	0.110691	0.0123322	0.0960716	0.108404	0.179314	0.00666335	0.843163	0.827747	0.0217802	-		0.421167	0.429057	0.149777		1.85022	0.0435604	0.0230018		0.0217802		0.251445		0.687482	0.0853292	0.00758651	0.782125	0.179561	0		979.031
	TA	LH26-1	#32	51.8867	0.643698	2.47648	7.54937	0.144517	16.5096	20.5841	0.266562	0.309641	100.377		1.90127	0.0177419	0.0987267	0.00822307	0.10695	-	0.0649872	0.0649872	0.166355	0.00448531	0.901846	0.808153	0.018938	0.00897062		0.415308	0.463507	0.121185		1.87635	0.037876	0.0197865		0.018938		0.265268		0.575166	0.0827244	0.00898294	0.763818	0.187785	0.000167398		1041.49
	TA	LH26-1	#33	52.1358	0.526838	2.15793	6.97809	0.21791	16.392	21.0489	0.277187	0.326139	100.063		1.91529	0.0145581	0.0847065	0.00872492	0.0934314	-	0.0571357	0.0571357	0.157248	0.00678051	0.897719	0.828518	0.0197432	0.00947277		0.425429	0.461013	0.113558		1.88348	0.0394865	0.0205341		0.0197432		0.264433		0.596956	0.0719368	0.00789624	0.789966	0.163733	0		1034.14
	TA	LH26-1	#34	51.9047	0.616658	2.25783	7.0288	0.179341	16.3507	21.152	0.285405	0.267607	100.043		1.90716	0.0170433	0.0928413	0.0049336	0.0977749	-	0.0663793	0.0663793	0.149603	0.00558144	0.895622	0.832731	0.0203324	0.00777415		0.427041	0.459343	0.113616		1.87796	0.0406648	0.0211948		0.0203324		0.262845		0.608675	0.0719706	0.00773197	0.792338	0.162724	0		1026.72
	TA	LH26-1	#49	51.6249	0.609748	2.20446	7.80065	0.140151	16.563	20.1365	0.285258	0.20133	99.566		1.90668	0.0169394	0.0933164	0.00264056	0.095957	-	0.0713449	0.0713449	0.169594	0.00438433	0.91194	0.796851	0.020427	0.00587898		0.407763	0.466707	0.12553		1.87838	0.0408539	0.0212865		0.020427		0.262247		0.585378	0.0880387	0.00908941	0.757704	0.201035	0		1029.43
	TA	LH26-1	#60	51.1848	0.790037	2.76405	8.17505	0.204103	15.7603	20.7785	0.298141	0.109328	100.077		1.88726	0.0219113	0.112743	0.00737015	0.120114	-	0.0796773	0.0796773	0.172402	0.00637418	0.866292	0.820875	0.0213137	0.00318709		0.421892	0.445282	0.132826		1.85957	0.0426274	0.0224096		0.0213137		0.266199		0.577507	0.0771785	0.00857758	0.774783	0.17556	0		1044.07
	TA	LH26-1	#70	52.1242	0.599687	2.28027	7.00224	0.16041	16.3833	21.1438	0.290114	0.144351	100.139		1.91241	0.0165499	0.0875851	0.0110167	0.0986017	-	0.0599187	0.0599187	0.154931	0.00498492	0.896089	0.831186	0.0206376	0.00418733		0.426863	0.460245	0.112893		1.88221	0.0412751	0.0214586		0.0206376		0.265822		0.589171	0.0694029	0.00780407	0.794108	0.161226	0.000451144		1040.23
	TA	LH26-1	#130	49.7804	1.07685	3.2962	8.65975	0.226495	14.9617	20.7547	0.339439	bdl	99.109		1.85887	0.0302465	0.141134	0.00393005	0.145064	-	0.100888	0.100888	0.16954	0.00716364	0.832873	0.830386	0.0245753	-		0.427829	0.429158	0.143013		1.8328	0.0491506	0.0261168		0.0245753		0.26622		0.581603	0.0772689	0.00858851	0.774539	0.169058	0		1042.99
	TA	LH26-1	#131	50.1373	1.27746	3.06418	8.2664	0.239497	14.8823	20.8858	0.404737	bdl	99.18		1.87092	0.0358566	0.129084	0.00567729	0.134761	-	0.0803785	0.0803785	0.17759	0.00756972	0.827888	0.83506	0.0292829	-		0.432996	0.429324	0.13768		1.84054	0.0585657	0.0308386		0.0292829		0.265097		0.597565	0.0747638	0.00822969	0.782171	0.155508	0		1035.4
	TA	LH26-1	#123	49.651	1.08322	4.11607	8.15767	0.23176	15.8213	20.2561	0.263517	bdl	99.584		1.83657	0.0301388	0.163426	0.0160143	0.17944	-	0.105933	0.105933	0.146417	0.00726115	0.872432	0.802805	0.0188989	-		0.414901	0.450935	0.134164		1.82165	0.0377978	0.0203274		0.0188989		0.265839		0.560543	0.0993366	0.0105611	0.728919	0.20294	0.0149028		1045.5
	TA	LH26-1	#124	50.4562	0.832544	2.80498	8.61631	0.187218	16.0278	20.4941	0.278631	bdl	99.708		1.8661	0.023161	0.122266	-	0.122266	0.0116302	0.107256	0.118887	0.147614	0.00586481	0.883698	0.812127	0.0199801	-		0.412609	0.44902	0.138371		1.84344	0.0399602	0.0212171		0.0199801		0.255577		0.635495	0.0916011	0.0085582	0.762491	0.199608	0		999.42
	TA	LH26-1	#155	51.9393	0.566635	1.95927	7.76418	0.168797	16.1809	20.6174	0.275482	0.191068	99.663		1.91998	0.0157555	0.0800239	0.00533493	0.0853589	-	0.057338	0.057338	0.182684	0.00528507	0.891681	0.816593	0.0197442	0.00558422		0.41798	0.456464	0.125556		1.89096	0.0394884	0.0204556		0.0197442		0.262145		0.603633	0.0767299	0.00808345	0.782305	0.177416	0		1025.87
	TA	LH26-2	#195	50.0541	1.01621	3.11587	10.0639	0.287146	14.9917	19.9107	0.292238	bdl	99.782		1.86311	0.028452	0.136689	-	0.136689	0.000198965	0.101074	0.101273	0.211998	0.00905292	0.831874	0.794071	0.0210903	-		0.407562	0.427011	0.165427		1.83794	0.0421807	0.022435		0.0210903		0.264447		0.566093	0.0945861	0.00994759	0.740663	0.20723	0		1040.01
	TA	LH26-2	#209	52.2764	0.660474	2.63573	7.17767	0.106351	16.4156	20.9392	0.270314	0.0483356	100.53		1.91066	0.0181578	0.0893423	0.0241937	0.113536	-	0.0465917	0.0465917	0.172798	0.00329235	0.89442	0.819994	0.0191555	0.00139675		0.423292	0.461762	0.114946		1.88721	0.0383109	0.0198964		0.0191555		0.265211		0.586651	0.0777195	0.00851605	0.775114	0.171519	0.0128536		1038.74
	TA	LH26-2	#211	52.5898	0.503301	2.13761	6.42234	0.180071	16.9343	20.9076	0.234591	0.0723413	99.982		1.9269	0.0138712	0.0730983	0.0192101	0.0923085	-	0.0407155	0.0407155	0.156076	0.0055884	0.924981	0.820797	0.0166654	0.00209565		0.4213	0.474827	0.103873		1.90185	0.0333308	0.0172236		0.0166654		0.263416		0.59951	0.0748613	0.0080551	0.784589	0.170501	0.00936258		1030.54
	TA	LH26-2	#228	51.7089	0.56994	2.13903	7.20259	0.143248	16.6287	20.5066	0.269784	0.160282	99.329		1.91135	0.0158465	0.0886508	0.0045347	0.0931855	-	0.0670736	0.0670736	0.155575	0.00448486	0.916307	0.812159	0.0193347	0.00468419		0.41528	0.468586	0.116134		1.88404	0.0386695	0.020112		0.0193347		0.262889		0.593046	0.0792495	0.00839124	0.775415	0.184971	0		1030.35
	TA	LH26-2	#249	51.1546	0.657215	2.8578	15.0997	0.298238	23.1654	6.08674	0.106471	bdl	99.463		1.87388	0.018109	0.12338	-	0.12338	0.00273625	0.0967638	0.0995	0.363076	0.0092535	1.26504	0.2389	0.007562	-		0.120908	0.640311	0.238782		1.86702	0.015124	0.00803553		0.007562		0.271485		0.0854087	0.55242	0.0482378	0.182162	0.779994	0.00643848		1082.34
	TA	LH26-2	#258	48.9175	1.47609	4.20886	11.1912	0.201188	15.128	17.9719	0.351561	bdl	99.488		1.82765	0.0414833	0.172349	0.0129822	0.185332	-	0.101868	0.101868	0.247805	0.00636673	0.842597	0.719441	0.0254669	-		0.37507	0.439324	0.185607		1.80984	0.0509339	0.0273724		0.0254669		0.27088		0.471938	0.142701	0.0152994	0.645091	0.278794	0.00486715		1076.93
	TA	LH27-2	#11	51.1006	0.791864	2.44918	8.53072	0.283199	15.7126	20.8782	0.297478	bdl	100.046		1.88685	0.0219933	0.106583	-	0.106583	0.00656814	0.0904613	0.0970294	0.166393	0.00885704	0.864905	0.825994	0.0212967	-		0.420726	0.440594	0.138681		1.85729	0.0425934	0.0224189		0.0212967		0.25317		0.674948	0.0779915	0.00893785	0.783857	0.176839	0		994.995
	TA	LH27-2	#12	51.2563	0.816034	2.3962	8.27654	0.203422	15.6662	20.787	0.35963	bdl	99.793		1.8957	0.0227018	0.104299	0.000149354	0.104448	-	0.0845344	0.0845344	0.171458	0.00637244	0.863764	0.823737	0.0257885	-		0.422441	0.443016	0.134543		1.85896	0.0515769	0.026996		0.0257885		0.257827		0.640372	0.074235	0.00917047	0.78438	0.171731	0		1014.88
	TA	LH27-2	#24	52.016	0.722181	2.23313	8.52548	0.21485	15.9293	20.5611	0.364227	bdl	100.621		1.90804	0.0199263	0.0919597	0.00458304	0.0965428	-	0.0728305	0.0728305	0.188702	0.0066753	0.871077	0.80811	0.0259042	-		0.414952	0.447334	0.137714		1.86789	0.0518083	0.0269878		0.0259042		0.259829		0.616407	0.0778153	0.00981416	0.772826	0.183426	0		1025.65
	TA	LH27-2	#41	50.7676	0.872425	3.09106	8.78989	0.191301	15.8417	20.2518	0.313391	0.0409881	100.175		1.87069	0.0241809	0.129313	0.00492574	0.134239	-	0.0972212	0.0972212	0.173645	0.00597059	0.870214	0.799562	0.0223897	0.00119412		0.410728	0.44707	0.142201		1.84342	0.0447795	0.0237154		0.0223897		0.262837		0.581882	0.0865208	0.0111853	0.748576	0.200946	0		1041.69
	TA	LH27-2	#43	51.0628	0.889981	2.78301	9.06897	0.250757	15.8649	19.4866	0.248209	0.0408054	99.696		1.89381	0.024828	0.106192	0.0154552	0.121647	-	0.0577326	0.0577326	0.223552	0.00787716	0.877156	0.774354	0.0178482	0.00119653		0.398997	0.452016	0.148987		1.87506	0.0356965	0.0186818		0.0178482		0.261127		0.578553	0.0997547	0.0123196	0.725346	0.219347	0.00726417		1035.7
	TA	LH27-2	#48	49.5853	1.35202	4.67192	7.89962	0.180577	14.884	20.3181	0.308626	0.149332	99.423		1.84269	0.0377932	0.157306	0.0473163	0.204622	-	0.0522524	0.0522524	0.193254	0.00568394	0.824571	0.809015	0.0222372	0.00438761		0.429219	0.43752	0.133261		1.82684	0.0444744	0.0237664		0.0222372		0.263807		0.592095	0.100383	0.0128457	0.718968	0.178051	0.0345303		1041.55
	TA	LH27-2	#50	48.7453	1.23189	4.33769	9.36428	0.153159	12.3977	22.7399	0.449243	bdl	99.435		1.83113	0.0348086	0.168871	0.0231726	0.192044	-	0.108702	0.108702	0.18548	0.0048732	0.694281	0.915266	0.03272	-		0.479532	0.363792	0.156675		1.79503	0.0654401	0.035174		0.03272		0.266549		0.624261	0.0485135	0.00721722	0.843234	0.0771574	0.00874892		1032.14
	TA	LH27-2	#69	51.3387	0.816618	2.58993	8.45965	0.248097	15.8907	20.0878	0.298748	bdl	99.759		1.89938	0.0227256	0.10062	0.0123097	0.11293	-	0.0641898	0.0641898	0.197553	0.00777454	0.87643	0.796292	0.0214298	-		0.409969	0.451277	0.138754		1.87027	0.0428596	0.0224028		0.0214298		0.262812		0.586657	0.0837288	0.0108766	0.754604	0.194902	0.0017874		1040.81
	TA	LH27-2	#78	50.0303	1.13507	3.22805	8.72931	0.316987	15.3915	20.6131	0.366966	bdl	99.84		1.85252	0.0316143	0.140872	-	0.140872	0.00661116	0.110004	0.116615	0.153697	0.00994159	0.849609	0.817795	0.0263452	-		0.41987	0.436251	0.14388		1.8211	0.0526904	0.0281197		0.0263452		0.256864		0.637808	0.0857344	0.0102133	0.760926	0.185011	0		1012.1
	TA	LH27-2	#148	51.0421	0.889702	3.07269	8.48637	0.159297	16.5846	18.9722	0.303411	0.0887403	99.616		1.88528	0.0247184	0.114721	0.0190372	0.133759	-	0.0653842	0.0653842	0.196751	0.00498355	0.913186	0.750822	0.0217283	0.00259145		0.388783	0.472908	0.138309		1.86076	0.0434566	0.0228213		0.0217283		0.263905		0.541265	0.112086	0.0141155	0.697357	0.242241	0.00838563		1050.95
	TA	LH27-2	#149	50.3649	0.85271	3.28354	8.28256	0.231297	15.5034	20.5963	0.304515	0.0916477	99.513		1.86806	0.02379	0.13194	0.0115964	0.143536	-	0.0919746	0.0919746	0.164937	0.00726639	0.857235	0.818514	0.0218987	0.00268757		0.421913	0.44192	0.136167		1.84069	0.0437974	0.0232411		0.0218987		0.262975		0.596236	0.0801592	0.0105076	0.7622	0.180281	0.00508259		1039.38
	TA	LH27-2	#150	50.7781	0.88354	2.89711	8.75128	0.206484	16.2205	19.4972	0.294203	0.0884825	99.638		1.87912	0.0245942	0.12088	0.00547645	0.126357	-	0.0847356	0.0847356	0.1861	0.00647217	0.894852	0.773076	0.0211092	0.00258887		0.397403	0.460053	0.142544		1.85403	0.0422185	0.0222642		0.0211092		0.262375		0.565365	0.0993735	0.0124918	0.723655	0.22521	0		1042.3
	TA	LH27-2	#154	50.4609	1.00501	3.12721	8.71455	0.206452	15.6911	20.2424	0.306646	0.0714556	99.851		1.86669	0.0279651	0.133307	0.00303535	0.136342	-	0.0942453	0.0942453	0.175354	0.00646879	0.865325	0.802329	0.0219939	0.00208992		0.412763	0.44522	0.142018		1.84301	0.0439878	0.023311		0.0219939		0.261491		0.59355	0.0876888	0.0111064	0.748537	0.197743	0		1034.9
	TA	LH27-2	#161	51.2291	0.786225	2.42947	8.49557	0.233792	15.6043	20.0577	0.273277	bdl	99.149		1.90948	0.0220432	0.0905169	0.0162083	0.106725	-	0.0496721	0.0496721	0.215146	0.00738099	0.867067	0.801037	0.0197491	-		0.412824	0.446902	0.140274		1.88325	0.0394983	0.0205426		0.0197491		0.261748		0.599141	0.0818136	0.0105126	0.760637	0.188043	0.00499192		1034.91
	TA	LH27-2	#170	50.911	0.877655	2.88759	8.70274	0.270409	16.0886	19.7417	0.308527	bdl	99.812		1.8815	0.0243975	0.118502	0.00726947	0.125772	-	0.0838478	0.0838478	0.185122	0.00846445	0.886377	0.781717	0.0221071	-		0.401785	0.455627	0.142588		1.85322	0.0442143	0.0233022		0.0221071		0.26305		0.569693	0.0933003	0.0119542	0.734235	0.214621	0		1044.3
	TA	LH27-2	#173	50.0107	1.01501	3.34094	8.09198	0.195406	15.7421	20.059	0.340081	bdl	98.802		1.86487	0.0284698	0.135132	0.0116965	0.146828	-	0.0908842	0.0908842	0.161461	0.00617176	0.875096	0.801433	0.0245875	-		0.41415	0.452265	0.133585		1.83799	0.049175	0.0260576		0.0245875		0.264595		0.57468	0.0863306	0.0114322	0.745862	0.195092	0.00227376		1048.98
	TA	LH27-2	#174	50.6118	0.796639	2.80437	7.96217	0.263317	16.0928	20.5398	0.306289	0.0679738	99.46		1.87343	0.0221808	0.122342	-	0.122342	0.00422728	0.102201	0.106428	0.140047	0.00825563	0.888027	0.814621	0.0219818	0.00198931		0.416162	0.453712	0.130127		1.8427	0.0439637	0.0233024		0.0219818		0.257414		0.630091	0.0827904	0.00999493	0.766108	0.189306	0		1015.41
	TA	LH27-2	#181	50.1025	1.0123	3.57844	8.63377	0.21525	15.0643	20.5643	0.398259	bdl	99.583		1.85973	0.0282636	0.140273	0.0162715	0.156545	-	0.0960366	0.0960366	0.17197	0.00676735	0.833578	0.817854	0.0286617	-		0.424576	0.432786	0.142638		1.8234	0.0573234	0.0304794		0.0286617		0.266197		0.578123	0.0787511	0.0108076	0.759976	0.175271	0.00372902		1053.66
	TA	LH27-2	#183	52.0712	0.694273	1.85965	8.5224	0.290709	15.8891	20.7108	0.245622	bdl	100.341		1.91817	0.0192375	0.0807376	-	0.0807376	0.00109644	0.0609021	0.0619985	0.200548	0.00907052	0.872564	0.817443	0.017543	-		0.4167	0.444847	0.138453		1.89056	0.035086	0.0182204		0.017543		0.253183		0.674259	0.0769313	0.00883694	0.786155	0.177554	0		995.227
	TA	LH27-2	#13	49.7356	0.764563	2.64799	7.82631	0.158844	15.8486	20.3348	0.269404	0.0467132	97.637		1.87522	0.0216835	0.117668	-	0.117668	0.00711177	0.099714	0.106826	0.139948	0.00507273	0.890812	0.821485	0.0196941	0.00139252		0.418223	0.453567	0.12821		1.85224	0.0393883	0.0208224		0.0196941		0.254555		0.655029	0.0813481	0.00945083	0.774222	0.1868	0		1002.44
	TA	LH27-2	#42	50.3085	0.742083	2.32319	7.60146	0.271727	16.0048	20.13	0.320642	0.0736118	97.776		1.89309	0.0210044	0.103031	-	0.103031	0.00388234	0.0861082	0.0899905	0.149221	0.00866059	0.897815	0.811607	0.0233936	0.00219004		0.41464	0.458732	0.126628		1.85864	0.0467871	0.0245546		0.0233936		0.255003		0.650637	0.0828158	0.00965711	0.770331	0.187643	0		1004.46
	TA	LH27-2	#43	50.1758	0.549851	3.26497	7.33388	0.197793	15.231	19.3153	0.252471	0.0562849	96.443		1.91589	0.0157925	0.08411	0.0628202	0.14693	-	0.00669682	0.00669682	0.227492	0.00639696	0.866988	0.790225	0.0186911	0.00169919		0.416372	0.456869	0.126759		1.8847	0.0373822	0.0194488		0.00669682		0.261611		0.600048	0.0989921	0.0123219	0.725854	0.188116	0.0458163		1033.23
	TA	LH27-2	#67	50.6906	0.731625	2.39757	9.03877	0.22803	14.9792	19.8733	0.358892	bdl	98.298		1.91036	0.0207399	0.08964	0.0168511	0.106491	-	0.0575332	0.0575332	0.227341	0.00727889	0.841559	0.802473	0.026224	-		0.414444	0.434678	0.150877		1.87137	0.0524479	0.0272624		0.026224		0.265009		0.580679	0.0770056	0.0104396	0.766012	0.182924	0.000217211		1049.53
	TA	LH27-2	#75	49.6188	1.09095	3.22165	9.11832	0.233641	15.027	19.4449	0.293954	bdl	98.085		1.87417	0.0309954	0.125825	0.0175906	0.143416	-	0.0670736	0.0670736	0.220954	0.00747477	0.846144	0.786944	0.0215273	-		0.408024	0.438767	0.153208		1.85404	0.0430547	0.022695		0.0215273		0.263261		0.575596	0.0953497	0.0122101	0.729766	0.205419	0.00738373		1043.79
	TA	LH27-2	#88	49.3439	0.850333	2.81279	8.50946	0.227159	15.2784	18.9571	0.28832	0.0591945	96.339		1.89208	0.0245258	0.107924	0.0191919	0.127115	-	0.0593206	0.0593206	0.213554	0.00737768	0.873358	0.778844	0.0214352	0.00179457		0.403017	0.451973	0.145011		1.86576	0.0428703	0.0224613		0.0214352		0.26322		0.570988	0.0959081	0.0122635	0.728745	0.21162	0.00778231		1044.49
	TA	LH27-2	#90	51.3687	0.592003	2.03084	8.50689	0.309809	15.3158	19.7585	0.25838	0.0536401	98.205		1.93582	0.0167811	0.0641778	0.0260207	0.0901985	-	0.0218754	0.0218754	0.246223	0.00988888	0.860432	0.797802	0.0188788	0.0015982		0.412024	0.444417	0.143559		1.90446	0.0377575	0.0194404		0.0188788		0.26116		0.606352	0.0813072	0.0103737	0.762766	0.183936	0.0108916		1031.57
	TA	LH27-2	#95	49.7385	0.873601	3.00187	8.66529	0.183092	15.2779	19.3973	0.280625	bdl	97.458		1.88636	0.0249215	0.113642	0.0205353	0.134177	-	0.0627025	0.0627025	0.212132	0.00588147	0.863779	0.788217	0.020635	-		0.407813	0.446956	0.145231		1.86413	0.04127	0.0216595		0.020635		0.26268		0.579818	0.0934182	0.011907	0.734687	0.204954	0.0104053		1041.14
	TA	LH27-2	#96	50.3311	0.877701	2.69778	8.30177	0.249425	15.075	19.9837	0.370474	bdl	97.889		1.90053	0.0249296	0.099469	0.0205918	0.120061	-	0.0561414	0.0561414	0.206018	0.00797746	0.848603	0.808516	0.0271234	-		0.419499	0.440347	0.140154		1.86314	0.0542468	0.0282921		0.0271234		0.265413		0.583301	0.0768812	0.0104816	0.765635	0.175179	0.0028555		1050.08
	TA	LH27-2	#129	49.3746	1.00783	2.9774	9.06489	0.239902	14.52	19.3927	0.314409	bdl	96.895		1.89062	0.0290282	0.109379	0.0249882	0.134367	-	0.0495773	0.0495773	0.240704	0.00778074	0.828849	0.795631	0.0233422	-		0.413827	0.431151	0.155022		1.86518	0.0466845	0.0244182		0.0233422		0.263983		0.582195	0.0881285	0.0115376	0.743138	0.190317	0.00995009		1045.22
	TA	LH27-2	#130	49.7491	0.945977	2.59854	9.49651	0.353883	14.7215	18.7214	0.366998	bdl	96.977		1.90427	0.0272367	0.0957274	0.0215	0.117227	-	0.0462924	0.0462924	0.257701	0.0114733	0.840047	0.767815	0.0272367	-		0.399196	0.436798	0.164007		1.86556	0.0544733	0.028371		0.0272367		0.266096		0.552827	0.0949478	0.0126366	0.725268	0.211601	0.00198656		1058.06
[truncated: 1 more columns]

## Sheet: S2c - CPX3
	Table S2c. Clinopyroxene: complete dataset for the EMPA, chemical formulae and thermobarometry results of CPX3 group from LHPCS lavas
	Rock Type	Sample	Spot																																					KD cpx-liq(Mg-Fe)	KD cpx-liq(Mg-Fe)		Predicted			Observed (Putirka et al. 1996)
		(thin section)		SiO2	TiO2	Al2O3	FeOtot	MnO	MgO	CaO	Na2O	Cr2O3	Total		Si	Ti	Al[IV]	Al[VI]	AlTot	Fe3+ [IV]	Fe3+ [VI]	Fe3+ Tot	Fe2+	Mn	Mg	Ca	Na	Cr		XWo	XEn	XFs		Q	J	J/(J+Q)		XAeg		[eq. 35]	[eq. 35a]		XEnFs	XDiHd	XCaTs	XEnFs	XDiHd	XCaTs
				(wt%)											(apfu)																												[eq. 3.1a]	[eq. 3.2]	[eq. 3.4]
	TR	LH5-1	#44	48.7484	1.15268	3.44649	10.7635	0.263667	14.2599	19.3574	0.379432	0.0564933	98.465		1.84429	0.0328024	0.153674	-	0.153674	0.00203772	0.11625	0.118287	0.222261	0.00844909	0.804254	0.784672	0.0278323	0.00168982		0.404889	0.415038	0.180073		1.81119	0.0556646	0.0298174		0.0278323		0.252249	0.165578		0.534562	0.0825495	0.00685723	0.723215	0.21658	0
	TR	LH5-1	#47	48.2125	1.41551	4.65865	9.03889	0.218892	14.5368	19.8524	0.422113	0.341698	98.712		1.80976	0.0399672	0.190242	0.0158576	0.206099	-	0.11503	0.11503	0.168717	0.00695946	0.813462	0.798449	0.030721	0.0101409		0.419642	0.427579	0.152779		1.78063	0.0614421	0.0333549		0.030721		0.258532	0.167816		0.507541	0.0815063	0.00742961	0.712561	0.197666	0.00446784
	TR	LH5-1	#48	48.5977	1.51175	4.13309	9.39164	0.209185	14.1008	20.4633	0.360079	bdl	98.801		1.82856	0.0427861	0.171443	0.0118408	0.183284	-	0.0993035	0.0993035	0.196219	0.00666667	0.790945	0.824975	0.0262687	-		0.430082	0.412386	0.157532		1.81214	0.0525373	0.028175		0.0262687		0.256093	0.164125		0.54011	0.06744	0.00611689	0.752194	0.171669	0.00214069
	TR	LH5-1	#51	48.4813	1.43042	4.33978	8.73351	0.197115	14.6446	20.3115	0.340344	0.21117	98.696		1.81966	0.0403839	0.180335	0.0116377	0.191973	-	0.106431	0.106431	0.167703	0.00626647	0.819416	0.81683	0.0247675	0.00626647		0.42616	0.427556	0.146284		1.80395	0.049535	0.0267253		0.0247675		0.255666	0.167156		0.535467	0.0738497	0.00656298	0.736646	0.183359	0.00470063
	TR	LH5-1	#93	49.672	1.06453	3.10108	10.9716	0.330725	13.4921	20.2718	0.387095	bdl	99.291		1.87146	0.0301688	0.128541	0.00916015	0.137701	-	0.0873202	0.0873202	0.258376	0.0105541	0.757804	0.81834	0.028277	-		0.423471	0.392187	0.184342		1.83452	0.056554	0.0299058		0.028277		0.254692	0.160007		0.549309	0.0629457	0.00565561	0.766927	0.172331	0
	TR	LH5-1	#103	49.3436	1.36902	4.03145	9.45848	0.248825	14.8783	19.4684	0.388021	0.124847	99.357		1.84127	0.0384261	0.158732	0.018566	0.177298	-	0.0877031	0.0877031	0.207461	0.00786441	0.827655	0.778378	0.028073	0.00368333		0.407712	0.43357	0.158718		1.81349	0.0561459	0.0300303		0.028073		0.257554	0.16825		0.503575	0.0847262	0.00757083	0.707221	0.212036	0.00551687
	TR	LH5-1	#104	48.2042	1.72562	4.82511	9.70697	0.276345	14.6163	19.4277	0.37726	0.107654	99.288		1.80221	0.0485282	0.197792	0.014817	0.212609	-	0.110084	0.110084	0.193417	0.00875099	0.814638	0.778242	0.0273469	0.00318218		0.408482	0.427632	0.163886		1.7863	0.0546937	0.0297089		0.0273469		0.257549	0.169134		0.498496	0.0924415	0.00814751	0.69041	0.219088	0.00603942
	TR	LH5-1	#105	49.3594	1.32222	3.30797	12.5364	0.435241	15.4441	16.5573	0.352917	0.0670896	99.395		1.85175	0.0373116	0.146261	-	0.146261	0.00198995	0.0973086	0.0992985	0.294015	0.0138302	0.863738	0.665539	0.0256704	0.00198995		0.343682	0.44608	0.210237		1.82329	0.0513407	0.0273871		0.0256704		0.251966	0.176596		0.432409	0.150586	0.0113346	0.603769	0.331918	0
	TR	LH5-1	#107	47.8377	1.66074	4.63467	11.9594	0.369487	13.208	19.0298	0.371656	0.0798315	99.174		1.80937	0.0472484	0.190635	0.015965	0.2066	-	0.105041	0.105041	0.273245	0.011837	0.744734	0.771193	0.0272549	0.00238729		0.40459	0.390751	0.204659		1.78917	0.0545097	0.0295657		0.0272549		0.257573	0.163829		0.495236	0.0943289	0.00829029	0.686398	0.223322	0.00645669
	TR	LH5-1	#108	49.2888	1.17821	3.48206	8.67515	0.185385	14.6069	21.3491	0.347281	0.111083	99.224		1.84082	0.0330989	0.153269	-	0.153269	0.00591407	0.114852	0.120766	0.150188	0.00586437	0.813259	0.85431	0.0251472	0.00328007		0.439355	0.418289	0.142355		1.81776	0.0502945	0.0269235		0.0251472		0.248618	0.164975		0.608463	0.0581916	0.00483444	0.791104	0.152066	0
	TR	LH5-1	#52	50.5228	0.855044	2.30335	9.62932	0.335372	16.0492	19.7313	0.291637	bdl	99.739		1.87336	0.023848	0.100658	-	0.100658	0.0259843	0.0999131	0.125897	0.172699	0.0105329	0.887144	0.783903	0.0209663	-		0.395859	0.448043	0.156098		1.84375	0.0419327	0.0222374		0.0209663		Undef	Undef
	TR	LH5-1	#94	51.4362	0.497	1.13831	10.4337	0.450758	14.8382	20.1304	0.248881	bdl	99.19		1.93275	0.0140473	0.050411	-	0.050411	0.0168369	0.0572852	0.074122	0.253748	0.0143462	0.831183	0.810461	0.018132	-		0.408512	0.419003	0.172485		1.89539	0.036264	0.0187735		0.018132		Undef	Undef
	TR	LH5-1	#95	51.239	0.38547	0.988538	11.0442	0.51037	14.4122	19.9047	0.361628	bdl	98.883		1.93505	0.0109499	0.0439987	-	0.0439987	0.0209541	0.0692333	0.0901874	0.258617	0.0163253	0.811388	0.805415	0.0264789	-		0.406364	0.409422	0.184213		1.87542	0.0529577	0.0274623		0.0264789		Undef	Undef
	TA	LH4	#85	51.6643	0.629578	1.93829	8.88014	0.254139	16.9446	18.7391	0.291433	0.0714679	99.413		1.91307	0.0175356	0.0845891	-	0.0845891	0.0023414	0.0706902	0.0730316	0.201958	0.00797071	0.935363	0.743468	0.0209231	0.00209231		0.378957	0.476821	0.144222		1.88079	0.0418462	0.021765		0.0209231		0.25431			0.672333	0.148605	0.0139183	0.709359	0.254202	0
	TA	LH4	#86	50.3902	0.960573	2.85187	8.21101	0.189567	15.4737	20.7551	0.320212	0.125234	99.288		1.87428	0.026875	0.125019	-	0.125019	0.00069676	0.0913751	0.0920719	0.16334	0.00597223	0.85801	0.827154	0.0230926	0.00368287		0.424916	0.440815	0.134269		1.8485	0.0461852	0.0243761		0.0230926		0.257929			0.722686	0.098837	0.0103961	0.776156	0.172961	0
	TA	LH4	#121	50.835	0.919366	2.61646	9.89726	0.282741	16.3695	18.6018	0.303936	0.081681	99.933		1.88022	0.0255779	0.114055	-	0.114055	0.00572267	0.0880297	0.0937523	0.212386	0.0088577	0.90259	0.73718	0.0217959	0.00238859		0.377103	0.461769	0.161128		1.85216	0.0435918	0.0229945		0.0217959		0.254964			0.655056	0.163674	0.0152435	0.689464	0.264452	0
	TA	LH4	#124	50.3863	1.28416	2.49951	10.7431	0.277229	15.2948	18.7053	0.371585	0.107998	99.67		1.88068	0.036054	0.109955	-	0.109955	0.00936208	0.0709128	0.0802749	0.255067	0.0087645	0.851053	0.74807	0.0268911	0.00318709		0.384947	0.437989	0.177064		1.85419	0.0537822	0.0281881		0.0268911		0.244519			0.772135	0.177595	0.0139363	0.698179	0.248103	0
	TA	LH4	#130	50.3735	1.24456	2.60923	11.8702	0.273951	16.1715	16.4887	0.317764	0.131562	99.502		1.88197	0.034975	0.114889	-	0.114889	0.00313878	0.0672097	0.0703485	0.300526	0.00866901	0.90068	0.66004	0.0230177	0.00388611		0.340167	0.464237	0.195596		1.86125	0.0460354	0.0241367		0.0230177		0.254728			0.569107	0.242978	0.0211954	0.608647	0.335256	0
	TA	LH4	#132	50.8767	0.872585	2.70042	8.71653	0.243543	15.5554	19.9277	0.327471	0.135536	99.381		1.89262	0.0244164	0.107382	0.0110123	0.118394	-	0.0671699	0.0671699	0.204001	0.00767372	0.862645	0.79428	0.0236191	0.00398635		0.4103	0.445664	0.144035		1.86093	0.0472382	0.0247558		0.0236191		0.26321			0.659964	0.10957	0.0122004	0.748557	0.195878	0
	TA	LH4	#135	50.7667	0.897647	2.66821	8.2636	0.190558	16.2458	20.0727	0.299687	0.176925	99.584		1.87837	0.0249826	0.116353	-	0.116353	0.00527521	0.0879865	0.0932617	0.162437	0.00597193	0.896088	0.79576	0.021499	0.00517567		0.407329	0.458735	0.133936		1.85428	0.0429979	0.0226629		0.021499		0.254272			0.723653	0.121796	0.0117626	0.745942	0.207438	0
	TA	LH4	#136	51.3683	0.926888	2.18493	9.78698	0.239687	16.7236	17.3945	0.170841	0.0473009	98.843		1.92093	0.026072	0.079065	0.0172315	0.0962965	-	0.0206778	0.0206778	0.285393	0.00759184	0.932298	0.696951	0.0123867	0.0013985		0.358699	0.479877	0.161424		1.91464	0.0247734	0.0127736		0.0123867		0.25781			0.600676	0.187702	0.0178221	0.655426	0.29254	0.00830556
	TA	LH4	#137	50.9469	0.79646	2.26248	8.59964	0.296816	15.5832	20.3387	0.329683	0.118397	99.287		1.89693	0.0223063	0.099283	-	0.099283	0.00378411	0.0787692	0.0825533	0.185222	0.00936069	0.864967	0.811392	0.0238	0.00348536		0.415337	0.442809	0.141854		1.86158	0.0476001	0.0249322		0.0238		0.253679			0.751075	0.106655	0.0104264	0.770398	0.185129	0
	TA	LH4	#139	52.385	0.630205	1.47095	9.97951	0.271836	18.4775	16.2407	0.21655	0.106209	99.821		1.92816	0.0174481	0.0638102	-	0.0638102	0.00802612	0.0493033	0.0573294	0.249857	0.00847479	1.01388	0.640495	0.015454	0.0030908		0.325102	0.514683	0.160215		1.90423	0.030908	0.015972		0.015454		0.237649			0.670963	0.305227	0.0196687	0.610995	0.358319	0
	TA	LH4	#143	52.6945	0.619091	1.47021	9.86767	0.278092	18.2812	16.1568	0.22482	0.0821849	99.683		1.94343	0.0171747	0.0565666	0.00733917	0.0639057	-	0.0285579	0.0285579	0.275793	0.00868719	1.00512	0.638458	0.0160763	0.00239647		0.326292	0.513734	0.159974		1.91937	0.0321526	0.0164756		0.0160763		0.258384			0.527541	0.227618	0.0211387	0.612869	0.349884	0
	TA	LH4	#144	52.6479	0.615579	1.47731	10.3807	0.322889	17.6517	16.6494	0.208093	0.12672	100.095		1.94124	0.0170731	0.0587575	0.00544143	0.0641989	-	0.0303522	0.0303522	0.289744	0.0100841	0.970272	0.657764	0.0148766	0.00369418		0.335884	0.495519	0.168597		1.91778	0.0297531	0.0152774		0.0148766		0.256488			0.562243	0.214556	0.0195766	0.630758	0.331479	0
	TA	LH4	#162	50.2197	0.9327	2.9492	7.73201	0.176367	15.294	21.105	0.324699	0.145081	98.885		1.87426	0.0261835	0.12574	0.00398228	0.129723	-	0.0886057	0.0886057	0.15272	0.00557519	0.850913	0.843944	0.0234954	0.00428095		0.434611	0.438247	0.127142		1.84758	0.0469909	0.0248029		0.0234954		0.260513			0.714949	0.0878842	0.00976304	0.792212	0.15409	0
	TA	LH4	#163	50.6179	0.913636	2.80119	7.97916	0.210001	16.0263	20.9273	0.30441	0.0579477	99.842		1.8676	0.0253561	0.121809	-	0.121809	0.0105899	0.101772	0.112362	0.13384	0.00656276	0.881498	0.827305	0.0217764	0.00169041		0.421739	0.449414	0.128847		1.84264	0.0435528	0.0230903		0.0217764		0.25123			0.779564	0.105345	0.00995029	0.776928	0.180725	0
	TA	LH4	#190	51.4531	0.99167	2.04062	11.4589	0.260125	14.9629	17.5086	0.299839	bdl	99.098		1.93811	0.0280972	0.0618938	0.0286971	0.0905909	-	-0.00219978	-0.00219978	0.363164	0.00829917	0.840216	0.706629	0.0218978	-		0.368769	0.438532	0.192698		1.91001	0.0437956	0.0224156		-0.00219978		0.264148			0.588323	0.16131	0.0171185	0.671839	0.264765	0.00711722
	TA	LH4	#202	50.0955	1.38393	2.90635	10.2525	0.199043	15.0625	19.5636	0.289845	0.230158	99.996		1.86436	0.0387412	0.127477	-	0.127477	0.00816652	0.0723036	0.0804701	0.238622	0.00627428	0.835674	0.780102	0.0209143	0.00677223		0.401862	0.430537	0.167601		1.8544	0.0418285	0.0220588		0.0209143		0.247313			0.776805	0.151856	0.012759	0.720517	0.221051	0
	TA	LH4	#84	51.5481	0.604311	1.72988	8.27858	0.266745	16.8065	19.8291	0.273289	0.0612352	99.423		1.90739	0.0168197	0.0754398	-	0.0754398	0.017168	0.0767834	0.0939514	0.162225	0.00836008	0.927073	0.786146	0.0196064	0.00179145		0.397476	0.46878	0.133743		1.87544	0.0392128	0.0204803		0.0196064		Undef
	TA	LH4	#134	51.9957	0.549242	1.68167	9.65744	0.306046	16.847	18.75	0.23815	bdl	100.064		1.91812	0.0152406	0.0731149	-	0.0731149	0.00876581	0.0677358	0.0765016	0.221436	0.00956271	0.926487	0.74111	0.0170336	-		0.375211	0.469115	0.155674		1.88903	0.0340671	0.0177147		0.0170336		0.244545			0.754702	0.165732	0.0131526	0.710827	0.260763	0
	TA	LH13	#1	52.1888	0.518792	1.46828	9.65428	0.2669	14.8846	21.0663	0.303985	bdl	100.385		1.93306	0.0144541	0.0640965	-	0.0640965	0.00284098	0.0592618	0.0621028	0.236948	0.00837341	0.82189	0.836046	0.0218307	-		0.425374	0.418218	0.156407		1.89488	0.0436614	0.0225228		0.0218307		0.256683			0.670412	0.0706613	0.00688066	0.811744	0.157542	0
	TA	LH13	#2	52.4233	0.268706	0.760445	11.8776	0.3862	13.674	20.3706	0.29765	bdl	100.072		1.96746	0.00758559	0.0325382	0.00109791	0.0336361	-	0.0375287	0.0375287	0.335263	0.0122767	0.765046	0.819144	0.0216588	-		0.415952	0.388524	0.195524		1.91945	0.0433177	0.0220697		0.0216588		0.256314			0.666939	0.0723791	0.00698439	0.80833	0.166539	0
	TA	LH13	#8	52.71	0.457254	1.39711	8.70476	0.278174	15.6851	20.9033	0.283552	0.0582314	100.486		1.9414	0.012668	0.058602	0.00204484	0.0606469	-	0.0497743	0.0497743	0.218349	0.00867809	0.861225	0.824917	0.0202489	0.00169572		0.420228	0.438772	0.141		1.90449	0.0404977	0.0208216		0.0202489		0.260425			0.634696	0.0722328	0.00738874	0.802304	0.165893	0
	TA	LH13	#26	50.8487	0.739271	2.21393	8.48108	0.176755	15.758	20.5875	0.308867	0.060865	99.175		1.89287	0.0207001	0.0971313	-	0.0971313	0.0100017	0.0862339	0.0962357	0.16779	0.00557311	0.874481	0.821138	0.0222924	0.00179136		0.417818	0.445009	0.137173		1.86341	0.0445849	0.0233674		0.0222924		0.254514			0.668799	0.0866455	0.00791938	0.780958	0.183376	0
	TA	LH13	#27	51.124	0.693573	2.18361	8.30915	0.20637	15.923	20.8769	0.296816	0.0884338	99.725		1.89131	0.0193001	0.0952073	-	0.0952073	0.0134802	0.0887905	0.102271	0.154799	0.00646654	0.878156	0.827518	0.0212898	0.00258661		0.420211	0.445973	0.133816		1.86047	0.0425797	0.0223744		0.0212898		0.249063			0.722113	0.0883241	0.00742019	0.787276	0.178907	0
	TA	LH13	#28	51.479	0.737364	0.992506	13.0757	0.425171	13.9757	17.8897	0.385035	bdl	99.025		1.95508	0.0210642	0.0444245	-	0.0444245	0.000499151	0.0307477	0.0312469	0.384047	0.0136767	0.791255	0.727962	0.0283518	-		0.373649	0.40618	0.220171		1.90326	0.0567036	0.0289309		0.0283518		0.253673			0.613024	0.129899	0.0110054	0.71011	0.249921	0
	TA	LH13	#50	51.9983	0.586565	1.53625	8.39949	0.273158	15.5561	21.192	0.269189	0.0510409	99.862		1.92649	0.0163465	0.0670803	-	0.0670803	0.00642895	0.0586579	0.0650868	0.195161	0.00857193	0.859186	0.841245	0.0193367	0.0014951		0.427173	0.436331	0.136496		1.89559	0.0386733	0.0199938		0.0193367		0.250501			0.727276	0.0741627	0.00654484	0.813579	0.15598	0
	TA	LH13	#65	51.8561	0.672215	2.12218	7.84388	0.21708	15.8816	20.9056	0.357017	0.157318	100.049		1.91097	0.0186334	0.0890317	0.00313878	0.0921705	-	0.0695514	0.0695514	0.172184	0.00677578	0.872481	0.825449	0.0255088	0.00458361		0.424063	0.448274	0.127663		1.87011	0.0510176	0.026556		0.0255088		0.26494			0.602171	0.0748405	0.00809504	0.789265	0.165803	0
	TA	LH13	#92	52.0911	0.553161	1.34383	8.50307	0.250375	16.2567	20.1659	0.200757	bdl	99.389		1.93523	0.0154579	0.0588397	-	0.0588397	0.00593383	0.0479194	0.0538532	0.210327	0.00787853	0.900347	0.802713	0.0144606	-		0.406395	0.455875	0.13773		1.91339	0.0289212	0.0148901		0.0144606		0.247132			0.725206	0.0952335	0.00767527	0.77818	0.195822	0
	TA	LH13	#97	50.8149	0.846704	2.10503	9.2184	0.336637	15.1512	20.4189	0.335356	bdl	99.244		1.89864	0.0237965	0.0926968	-	0.0926968	0.00866232	0.0775626	0.0862249	0.201822	0.0106537	0.843929	0.817444	0.0242943	-		0.417031	0.43059	0.152379		1.8632	0.0485886	0.0254153		0.0242943		0.253892			0.676563	0.0880443	0.00795439	0.779301	0.180434	0
	TA	LH13	#138	52.35	0.618651	0.85962	13.5963	0.442661	14.4482	17.3551	0.346985	bdl	100.103		1.96639	0.0174795	0.0336105	0.00444478	0.0380553	-	0.0194771	0.0194771	0.407621	0.0140835	0.809049	0.698479	0.0252703	-		0.358419	0.415203	0.226378		1.91515	0.0505406	0.0257114		0.0194771		0.259709			0.543654	0.138232	0.0126439	0.684984	0.276798	0
	TA	LH13	#180	52.3363	0.487496	1.63402	8.49341	0.256549	16.085	21.0032	0.306806	0.103065	100.708		1.91865	0.0134429	0.0706	-	0.0706	0.0107543	0.0732885	0.0840428	0.176351	0.00796614	0.879064	0.824994	0.0218073	0.0029873		0.418248	0.445708	0.136044		1.88041	0.0436146	0.0226685		0.0218073		0.247418			0.740998	0.0855777	0.00704488	0.795412	0.176046	0
	TA	LH13	#169	52.8906	0.339059	1.39737	5.92409	0.224228	18.8951	18.6524	0.191713	0.31228	98.829		1.94609	0.00938405	0.0539084	0.00668863	0.060597	-	0.0330438	0.0330438	0.149246	0.00698812	1.03644	0.73535	0.0136767	0.00908456		0.374955	0.528537	0.0965081		1.92103	0.0273535	0.014039		0.0136767		0.263737			0.538057	0.117396	0.0116424	0.708573	0.256765	0
	TA	LH13	#170	52.431	0.357641	1.69137	5.10824	0.0794019	17.8018	19.8902	0.223386	0.455939	98.039		1.94773	0.0099935	0.052266	0.0217858	0.0740519	-	0.0131914	0.0131914	0.145505	0.00249838	0.985859	0.791685	0.0160895	0.0133913		0.40833	0.508535	0.0831359		1.92305	0.0321791	0.016458		0.0131914		0.266202			0.573958	0.0887026	0.0094996	0.756841	0.194487	0.00790399
	TA	LH13	#176	51.7888	0.673014	1.9045	7.60996	0.164441	16.0574	20.374	0.229326	0.0745315	98.876		1.93036	0.0188693	0.0696368	0.0140272	0.083664	-	0.0322476	0.0322476	0.204967	0.00519156	0.89225	0.813678	0.0165731	0.00219643		0.417609	0.457985	0.124405		1.91089	0.0331461	0.0170501		0.0165731		0.266197			0.587169	0.0775163	0.00847861	0.781133	0.175687	0.00283652
	TA	LH13	#231	51.1897	0.59883	2.29087	7.84654	0.270619	17.9378	17.3408	0.170459	0.0674219	97.713		1.91658	0.0168646	0.0834248	0.0176629	0.101088	-	0.0424109	0.0424109	0.203273	0.00858198	1.0012	0.695639	0.012374	0.00199581		0.356519	0.513175	0.130306		1.90011	0.024748	0.0128571		0.012374		0.264873			0.491661	0.152949	0.0147746	0.652591	0.299357	0.0124014
	TA	LH13	#232	51.2723	0.568413	2.11131	7.22743	0.203796	17.112	18.651	0.239695	0.0537419	97.448		1.92723	0.0160711	0.072769	0.0207626	0.0935316	-	0.0357357	0.0357357	0.191455	0.00648832	0.958874	0.751148	0.0174686	0.00159713		0.386434	0.493354	0.120212		1.90148	0.0349371	0.0180422		0.0174686		0.267894			0.530316	0.109257	0.011578	0.714469	0.237589	0.00934486
	TA	LH13	#233	51.7215	0.51088	1.44814	8.18874	0.253443	16.1402	19.2412	0.30345	bdl	97.844		1.94858	0.0144776	0.0514203	0.01288	0.0643003	-	0.0308522	0.0308522	0.227148	0.00808746	0.906495	0.776696	0.0221656	-		0.398436	0.465072	0.136493		1.91034	0.0443313	0.0226797		0.0221656		0.267633			0.556403	0.0883866	0.00965052	0.755093	0.206217	0
	TA	LH13	#234	51.0011	0.468115	1.53171	7.6039	0.282314	16.7823	18.6608	0.275122	0.0697945	96.702		1.93567	0.0133639	0.0643263	0.00418869	0.068515	-	0.0515608	0.0515608	0.189788	0.0090755	0.949536	0.758851	0.0202453	0.00209435		0.387386	0.484782	0.127833		1.89817	0.0404907	0.0208858		0.0202453		0.264088			0.558173	0.102777	0.0104569	0.733275	0.231439	0
	TA	LH13	#255	51.6264	0.490016	2.23484	5.67173	0.155643	17.3506	20.3391	0.213695	0.394732	98.481		1.91397	0.0136648	0.0860285	0.0116201	0.0976486	-	0.050869	0.050869	0.124978	0.00488741	0.958931	0.80792	0.0153604	0.0115702		0.414811	0.492399	0.0927902		1.89183	0.0307209	0.0159792		0.0153604		0.265573			0.58293	0.08566	0.00914771	0.764243	0.187692	0.00479186
	TA	LH13	#257	51.8812	0.392217	1.66578	6.08059	0.253319	18.1997	18.8739	0.261444	0.325657	97.959		1.92885	0.0109685	0.0711455	0.0018447	0.0729902	-	0.0566372	0.0566372	0.132419	0.00797707	1.0087	0.751838	0.0188458	0.00957248		0.384047	0.515311	0.100642		1.89296	0.0376916	0.0195228		0.0188458		0.262853			0.556861	0.111762	0.0110368	0.719768	0.241894	0
	TA	LH15	#38	52.0218	0.772277	2.13431	9.68267	0.34451	15.4399	19.77	0.30379	bdl	100.488		1.92113	0.0214523	0.0788745	0.0140188	0.0928933	-	0.0434034	0.0434034	0.255631	0.010776	0.850009	0.782259	0.0217516	-		0.402779	0.43771	0.159511		1.8879	0.0435032	0.0225242		0.0217516		0.263201			0.660016	0.0839654	0.0175677	0.749057	0.202098	0
	TA	LH15	#40	51.0011	0.945192	2.6392	8.08927	0.251181	15.5323	20.9623	0.306967	0.163498	99.891		1.88649	0.0262981	0.11351	0.00154402	0.115054	-	0.0766032	0.0766032	0.173627	0.00786951	0.856481	0.830781	0.0220147	0.00478147		0.427039	0.440298	0.132662		1.86089	0.0440294	0.0231135		0.0220147		0.258074			0.733534	0.0728886	0.0145246	0.783017	0.165402	0
	TA	LH15	#42	52.5465	0.688774	2.32356	6.78513	0.1424	16.4463	21.6544	0.248834	0.149086	101		1.91188	0.0188505	0.0881187	0.0115198	0.0996384	-	0.0521631	0.0521631	0.154295	0.00438848	0.892058	0.844184	0.0175539	0.00428874		0.433543	0.458179	0.108278		1.89054	0.0351078	0.0182317		0.0175539		0.260102			0.727775	0.0630476	0.0132236	0.804541	0.149418	0.00278857
	TA	LH15	#43	51.8458	0.808306	2.73371	6.9684	0.176252	15.8368	21.3024	0.264589	0.199118	100.146		1.90662	0.0223592	0.0933796	0.0251042	0.118484	-	0.0366331	0.0366331	0.177676	0.00548998	0.868216	0.839368	0.0188656	0.00578943		0.435477	0.450493	0.114029		1.88526	0.0377311	0.0196211		0.0188656		0.261152			0.719402	0.0683496	0.0143622	0.789106	0.148389	0.0124662
	TA	LH15	#44	52.8488	0.598234	2.37931	6.23054	0.100423	16.4564	21.7365	0.291526	0.194343	100.836		1.92283	0.0163722	0.0771688	0.0248577	0.102027	-	0.0345413	0.0345413	0.155036	0.00309474	0.892583	0.847359	0.020565	0.0055905		0.438432	0.461882	0.0996857		1.89498	0.0411301	0.0212437		0.020565		0.261907			0.718988	0.0614512	0.0132671	0.806154	0.139565	0.0100789
	TA	LH15	#46	52.1255	0.674769	2.3987	7.01543	0.190081	16.3882	21.4137	0.280077	0.131154	100.639		1.90349	0.0185347	0.0965098	0.00672629	0.103236	-	0.0687576	0.0687576	0.145487	0.00587928	0.892155	0.837847	0.0198301	0.00378665		0.429618	0.457516	0.112866		1.87549	0.0396602	0.0207087		0.0198301		0.260729			0.716497	0.0650945	0.0137032	0.798151	0.157359	0
	TA	LH15	#47	51.4711	1.00741	2.68203	8.46884	0.300344	15.6105	20.4188	0.35733	bdl	100.33		1.89616	0.0279156	0.103836	0.0126118	0.116448	-	0.0605169	0.0605169	0.200394	0.00937165	0.857307	0.805962	0.0255228	-		0.416813	0.443415	0.139773		1.86366	0.0510456	0.0266597		0.0255228		0.263743			0.673945	0.0774776	0.0165366	0.762734	0.180576	0
	TA	LH15	#48	52.5679	0.615673	2.12418	6.38456	0.231567	16.2799	21.6213	0.300675	0.124039	100.254		1.9257	0.0169648	0.0742958	0.0174139	0.0917097	-	0.0407155	0.0407155	0.154879	0.00718509	0.889055	0.848639	0.0213557	0.00359255		0.437316	0.458194	0.10449		1.89257	0.0427114	0.0220698		0.0213557		0.262236			0.717907	0.0583393	0.0127555	0.814443	0.136959	0.00288741
	TA	LH15	#49	53.1056	0.385837	0.991843	10.8032	0.425136	14.3848	20.0945	0.300761	bdl	100.495		1.97566	0.010797	0.0243433	0.0191447	0.043488	-	0.00519857	0.00519857	0.330909	0.0133963	0.797781	0.80098	0.021694	-		0.41111	0.409513	0.179377		1.92967	0.0433881	0.0219903		0.00519857		0.261803			0.695882	0.0677751	0.0143885	0.789533	0.172423	0
	TA	LH15	#50	52.9118	0.60804	2.03793	6.50054	0.139036	16.501	21.7726	0.22883	0.0415673	100.767		1.92824	0.0166675	0.0717601	0.0157692	0.0875293	-	0.0376266	0.0376266	0.160487	0.00429163	0.896452	0.850142	0.0161685	0.00119766		0.436175	0.459984	0.103841		1.90708	0.0323369	0.0166735		0.0161685		0.258963			0.744075	0.0593043	0.0123604	0.816505	0.140807	0.00609134
	TA	LH15	#52	51.6465	0.849714	2.59895	7.75604	0.166268	15.698	21.0301	0.331049	0.102763	100.19		1.90144	0.0235312	0.0985617	0.0142084	0.11277	-	0.0579306	0.0579306	0.180871	0.00518483	0.86158	0.829573	0.0236309	0.00299125		0.428671	0.445259	0.12607		1.87202	0.0472618	0.0246247		0.0236309		0.263841			0.689436	0.0673829	0.0147201	0.787342	0.159212	0.000317505
	TA	LH15	#59	52.2316	0.669726	2.12109	6.66504	0.159881	16.0077	21.5216	0.29335	0.137025	99.807		1.92479	0.0185643	0.0752052	0.0169174	0.0921227	-	0.0381266	0.0381266	0.167278	0.00499039	0.879407	0.849764	0.0209597	0.00399231		0.438101	0.453434	0.108465		1.89645	0.0419193	0.0216261		0.0209597		0.262009			0.719974	0.058338	0.0127158	0.814775	0.136747	0.0023198
	TA	LH15	#60	51.9655	0.704401	2.22031	6.65894	0.197879	16.0374	21.3902	0.263517	0.184634	99.646		1.91822	0.0195584	0.0817762	0.0148185	0.0965947	-	0.0413122	0.0413122	0.164251	0.00618685	0.882525	0.846002	0.0188599	0.00538855		0.436002	0.454874	0.109124		1.89278	0.0377198	0.0195389		0.0188599		0.260887			0.725906	0.0615927	0.0131077	0.807294	0.142327	0.0030379
	TA	LH15	#63	51.9076	0.697273	2.34037	7.18143	0.137961	16.0781	21.5814	0.276118	0.154672	100.372		1.90339	0.0192322	0.0966095	0.00453402	0.101143	-	0.0687576	0.0687576	0.151466	0.0042849	0.878902	0.847911	0.0196308	0.00448419		0.434513	0.450443	0.115044		1.87828	0.0392616	0.020475		0.0196308		0.259087			0.737207	0.0623952	0.0129236	0.807843	0.148845	0
	TA	LH15	#64	52.2946	0.620933	2.09207	6.64672	0.166711	16.2481	21.522	0.274508	0.147686	100.041		1.92095	0.0171567	0.0790504	0.0115209	0.0905713	-	0.0484776	0.0484776	0.155707	0.0051869	0.889753	0.847061	0.0195506	0.00428917		0.435222	0.457208	0.10757		1.89252	0.0391013	0.0202427		0.0195506		0.261235			0.72253	0.0594355	0.0127808	0.812778	0.142858	0.000267326
	TA	LH15	#65	52.4782	0.671359	2.1447	7.2625	0.19981	16.1207	21.4614	0.295655	0.148459	100.787		1.91742	0.0184511	0.0825812	0.0097741	0.0923553	-	0.0525607	0.0525607	0.169351	0.00618361	0.878073	0.840174	0.0209445	0.00428864		0.431649	0.45117	0.117181		1.8876	0.041889	0.0217099		0.0209445		0.260753			0.721621	0.0626299	0.013269	0.804673	0.150085	0
	TA	LH15	#67	50.512	1.05338	2.95491	8.03096	0.139056	15.34	20.7586	0.325828	0.101571	99.231		1.88018	0.0294931	0.119816	0.00981442	0.12963	-	0.0715407	0.0715407	0.178453	0.00438411	0.851214	0.827899	0.0235148	0.00298916		0.428171	0.440277	0.131552		1.85757	0.0470295	0.0246926		0.0235148		0.263087			0.690947	0.071881	0.0153868	0.777195	0.165341	0
	TA	LH15	#78	51.8658	1.15068	3.44737	10.2326	0.25625	13.2774	17.3667	0.420474	0.0636084	98.419		1.97083	0.0328891	0.0291677	0.12522	0.154388	-	-	-	0.32517	0.00824742	0.752125	0.707066	0.0309781	0.00191099		0.39442	0.419601	0.18598		1.78436	0.0619562	0.0335567		0.0309781		0.269644			0.599041	0.145219	0.030348	0.6252	0.220874	0.0741284
	TA	LH15	#85	51.8116	0.623208	2.3382	6.59687	0.134363	16.2806	21.6024	0.266933	0.171361	99.834		1.90576	0.0172427	0.0942367	0.00712631	0.101363	-	0.0666783	0.0666783	0.136247	0.00418608	0.892732	0.851369	0.0190367	0.00498343		0.436309	0.457556	0.106135		1.88035	0.0380734	0.0198462		0.0190367		0.260498			0.727474	0.0601413	0.0127778	0.811887	0.144964	0
	TA	LH15	#86	51.8738	0.697254	2.13327	7.9233	0.159589	15.9422	21.018	0.2468	bdl	100.024		1.91297	0.019341	0.0870345	0.00568267	0.0927172	-	0.0598176	0.0598176	0.184537	0.0049848	0.876427	0.830467	0.0176462	-		0.424505	0.448047	0.127447		1.89143	0.0352924	0.0183173		0.0176462		0.25898			0.725498	0.0670929	0.0137188	0.795741	0.165356	0
	TA	LH15	#101	51.7086	0.912926	2.56551	7.78933	0.166634	15.8364	21.0485	0.302379	0.0858242	100.416		1.8995	0.0252256	0.100504	0.0105688	0.111072	-	0.0585273	0.0585273	0.180767	0.00518471	0.867242	0.828456	0.0215365	0.00249265		0.426982	0.447021	0.125997		1.87646	0.0430729	0.0224392		0.0215365		0.262094			0.700679	0.0691172	0.0146867	0.785667	0.163146	0
	TA	LH15	#103	52.8025	0.557186	2.33018	5.85232	0.136725	17.168	21.7249	0.28727	0.306898	101.166		1.90884	0.0151511	0.091156	0.0081238	0.0992798	-	0.0640933	0.0640933	0.112836	0.0041865	0.925216	0.841486	0.0201351	0.00877171		0.431994	0.475031	0.092975		1.87954	0.0402701	0.0209761		0.0201351		0.260965			0.717359	0.0638251	0.0135215	0.801143	0.153461	0
	TA	LH15	#104	52.2766	0.634312	2.45445	6.28232	0.14807	16.4106	21.6216	0.253116	0.200008	100.281		1.91305	0.0174603	0.0869522	0.018907	0.105859	-	0.0452969	0.0452969	0.146966	0.00458956	0.895263	0.847771	0.0179591	0.00578683		0.437001	0.461532	0.101466		1.89	0.0359183	0.01865		0.0179591		0.260368			0.729395	0.0631117	0.0132839	0.803963	0.143842	0.00852982
	TA	LH15	#105	53.271	0.46073	1.94633	5.6273	0.146128	17.1013	21.653	0.275208	0.29222	100.784		1.93337	0.0125777	0.0666317	0.0166205	0.0832522	-	0.0358364	0.0358364	0.13496	0.00449203	0.925258	0.842005	0.0193656	0.00838512		0.433433	0.47634	0.0902276		1.90222	0.0387313	0.0199547		0.0193656		0.261175			0.721201	0.0610639	0.0130646	0.808317	0.145533	0.00332116
	TA	LH15	#132	51.6689	0.724157	2.34519	6.90998	0.124162	16.2959	20.8411	0.257297	0.177353	99.344		1.91146	0.0201511	0.0885353	0.0137167	0.102252	-	0.0477841	0.0477841	0.165997	0.00389057	0.898721	0.826097	0.0184552	0.00518742		0.425258	0.462694	0.112048		1.89081	0.0369105	0.0191472		0.0184552		0.26097			0.70776	0.0702158	0.0146554	0.784729	0.16611	0.00323867
	TA	LH15	#134	51.2356	0.810077	2.66318	7.38333	0.182248	16.1861	21.2036	0.269578	0.147288	100.081		1.88366	0.022402	0.115395	-	0.115395	0.000945862	0.0864717	0.0874175	0.139589	0.00567517	0.887119	0.835246	0.0192159	0.00428127		0.427207	0.453788	0.119005		1.86195	0.0384319	0.0202232		0.0192159		0.257445			0.737782	0.0712533	0.0141229	0.78796	0.167171	0
	TA	LH17	#241	52.4598	0.521836	1.76401	6.98216	0.239702	17.0184	20.0656	0.20943	0.256792	99.522		1.93476	0.0144765	0.065244	0.0114314	0.0766754	-	0.0323474	0.0323474	0.183003	0.00748783	0.93568	0.792912	0.0149757	0.00748783		0.406305	0.479514	0.114181		1.91159	0.0299513	0.0154265		0.0149757		0.261073			0.691508	0.106333	0.0123079	0.76038	0.19689	0.00188568
	TA	LH17	#242	51.9437	0.541295	1.79826	6.68068	0.210109	16.9516	20.465	0.268409	0.286478	99.154		1.92045	0.0150533	0.0783571	-	0.0783571	0.00119629	0.060313	0.0615093	0.14505	0.0065796	0.934304	0.810687	0.0192404	0.00837404		0.413991	0.477171	0.108838		1.89004	0.0384807	0.0199535		0.0192404		0.25515			0.754159	0.103256	0.0110425	0.775885	0.185447	0
	TA	LH17	#243	52.6809	0.535347	1.94845	6.63383	0.2088	16.7949	20.5691	0.28347	0.316604	99.997		1.93301	0.0147756	0.0669895	0.0172715	0.084261	-	0.0311486	0.0311486	0.172416	0.00648929	0.918684	0.808666	0.0201667	0.00918485		0.417377	0.474213	0.10841		1.89977	0.0403334	0.0207894		0.0201667		0.264357			0.683326	0.0954664	0.0117518	0.774113	0.175584	0.00250297
	TA	LH17	#245	51.2263	0.779732	2.86432	6.45736	0.201034	15.8169	21.5124	0.362445	0.485432	99.706		1.88897	0.0216275	0.111028	0.0134549	0.124483	-	0.0660786	0.0660786	0.133054	0.00627897	0.869487	0.849953	0.0259132	0.0141526		0.441548	0.451746	0.106706		1.85249	0.0518264	0.0272152		0.0259132		0.266334			0.69401	0.0822491	0.0106403	0.79726	0.138639	0
	TA	LH17	#246	50.4616	0.822062	2.92343	6.77727	0.17215	16.8741	20.6576	0.341207	0.46106	99.518		1.8571	0.0227566	0.126801	-	0.126801	0.0160986	0.108318	0.124416	0.0841697	0.00536619	0.925768	0.814568	0.0243466	0.0134155		0.416791	0.473741	0.109468		1.82451	0.0486932	0.0259947		0.0243466		0.24842			0.812235	0.125367	0.0117629	0.754794	0.195784	0
	TA	LH17	#251	52.286	0.77783	1.80186	9.94034	0.322995	16.1621	18.9503	0.329705	bdl	100.578		1.92539	0.0215451	0.0746097	0.00359084	0.0782006	-	0.0512693	0.0512693	0.25485	0.0100743	0.887238	0.747693	0.02354	-		0.383196	0.454762	0.162042		1.88978	0.0470799	0.0243073		0.02354		0.259319			0.662657	0.136562	0.0148323	0.717627	0.240425	0
	TA	LH17	#252	52.8028	0.664758	1.43103	9.75727	0.363781	16.3212	18.5386	0.287172	bdl	100.17		1.95184	0.0184834	0.0481567	0.0141872	0.0623439	-	0.0174843	0.0174843	0.284144	0.0113897	0.899391	0.734239	0.0205815	-		0.377165	0.462051	0.160784		1.91777	0.041163	0.0210129		0.0174843		0.263374			0.627689	0.134386	0.0154722	0.712606	0.245083	0
	TA	LH17	#254	51.4469	1.0189	2.50957	9.95506	0.251702	15.521	19.356	0.318738	bdl	100.411		1.90127	0.0283235	0.0987334	0.0105715	0.109305	-	0.0537549	0.0537549	0.253914	0.00787873	0.855091	0.766431	0.0228383	-		0.395649	0.441466	0.162885		1.87544	0.0456767	0.0237762		0.0228383		0.264842			0.639935	0.124392	0.014785	0.724576	0.221738	0
	TA	LH17	#255	51.0728	0.974242	2.84736	7.87677	0.220288	15.4347	21.2201	0.361227	0.253095	100.269		1.88127	0.0269934	0.118731	0.00488072	0.123612	-	0.0782908	0.0782908	0.164351	0.00687285	0.847552	0.837492	0.0257981	0.00737089		0.432893	0.438141	0.128966		1.84939	0.0515962	0.0271417		0.0257981		0.262879			0.710375	0.0903654	0.0109987	0.786154	0.155618	0
	TA	LH17	#264	51.1198	0.8415	2.74475	7.39489	0.228962	15.6956	20.9254	0.313962	0.350896	99.62		1.89199	0.0234268	0.108012	0.0117134	0.119726	-	0.0617072	0.0617072	0.167178	0.00717757	0.865994	0.829807	0.0225296	0.0102679		0.429519	0.448298	0.122183		1.86298	0.0450592	0.0236155		0.0225296		0.265346			0.687095	0.0916119	0.0115013	0.779849	0.160354	0
	TA	LH17	#266	51.5927	0.669535	2.09544	8.59193	0.203496	16.9907	18.9798	0.248638	bdl	99.414		1.90897	0.0186343	0.0910291	0.000348771	0.0913779	-	0.0701527	0.0701527	0.19571	0.00637752	0.937196	0.752448	0.0178371	-		0.383516	0.477733	0.138752		1.88535	0.0356742	0.0185704		0.0178371		0.259298			0.655941	0.137447	0.0149089	0.716448	0.246853	0
	TA	LH17	#267	50.5618	0.948843	2.32288	9.43868	0.29555	15.3184	19.8866	0.355748	bdl	99.142		1.89014	0.0266806	0.102342	-	0.102342	0.00751636	0.0818836	0.0893999	0.20568	0.00935812	0.85368	0.796536	0.0257846	-		0.407491	0.436773	0.155736		1.85589	0.0515692	0.0270355		0.0257846		0.253093			0.75804	0.119278	0.0121008	0.754478	0.201452	0
	TA	LH17	#268	50.6917	0.964971	2.33894	9.30478	0.302455	15.3998	19.8599	0.386753	bdl	99.264		1.89118	0.0270795	0.102842	-	0.102842	0.00597342	0.0826323	0.0886057	0.201702	0.00955747	0.856489	0.793867	0.0279755	-		0.407049	0.439205	0.153746		1.85206	0.055951	0.0293243		0.0279755		0.255258			0.737568	0.117868	0.0123652	0.752501	0.201447	0
	TA	LH17	#272	51.1303	0.727292	2.59755	6.93471	0.178174	16.0743	21.3664	0.316906	0.136341	99.462		1.88904	0.0202116	0.110965	0.00214063	0.113105	-	0.0871189	0.0871189	0.127144	0.00557561	0.885327	0.8458	0.0227007	0.00398258		0.43351	0.453819	0.112671		1.85827	0.0454014	0.0238494		0.0227007		0.261758			0.721638	0.0835548	0.0101394	0.801404	0.153113	0
	TA	LH17	#273	50.3607	0.867749	2.72597	7.78891	0.176863	15.8663	20.7573	0.28284	0.250375	99.077		1.87337	0.0242804	0.119511	-	0.119511	0.00711496	0.0911013	0.0982163	0.14409	0.00557256	0.879867	0.827325	0.0203995	0.00736373		0.423151	0.450073	0.126776		1.85128	0.0407991	0.0215631		0.0203995		0.255365			0.758763	0.103647	0.0111122	0.774857	0.178288	0
	TA	LH17	#274	51.5447	0.678863	2.38297	6.60732	0.184035	16.0883	20.922	0.286934	0.288936	98.984		1.91383	0.0189597	0.0861669	0.0181115	0.104278	-	0.0423101	0.0423101	0.162854	0.0057877	0.890508	0.832331	0.0206561	0.00848198		0.430395	0.460528	0.109077		1.88569	0.0413122	0.0214386		0.0206561		0.264424			0.698042	0.087651	0.0109452	0.789061	0.155244	0.00452339
	TA	LH17	#309	51.672	0.664596	1.70118	10.5648	0.366115	14.7727	19.758	0.379168	bdl	99.889		1.92693	0.0186422	0.0730735	0.00169475	0.0747682	-	0.0615093	0.0615093	0.267969	0.0115642	0.821254	0.789453	0.027415	-		0.40447	0.420809	0.174722		1.87868	0.05483	0.0283578		0.027415		0.258533			0.712353	0.10803	0.0120395	0.762021	0.197344	0
	TA	LH17	#310	51.5249	0.682083	1.72995	10.6467	0.466919	14.7002	19.857	0.354202	bdl	99.962		1.92162	0.0191345	0.0760396	-	0.0760396	0.00234198	0.0657249	0.0680669	0.263996	0.0147495	0.817301	0.793482	0.0256123	-		0.40532	0.417533	0.177147		1.87478	0.0512246	0.0265963		0.0256123		0.255177			0.743912	0.110342	0.0116825	0.764299	0.195811	0
	TA	LH17	#311	51.4826	0.658449	1.65836	10.3036	0.458992	14.5843	19.9986	0.362573	bdl	99.533		1.92747	0.018543	0.072527	0.000648007	0.073175	-	0.0609127	0.0609127	0.261695	0.0145552	0.813997	0.802233	0.0263191	-		0.410672	0.416739	0.172589		1.87793	0.0526381	0.0272657		0.0263191		0.257254			0.736224	0.101614	0.0112285	0.775013	0.183738	0
	TA	LH17	#312	51.6938	0.783312	1.99287	9.76068	0.285876	15.1886	20.1734	0.330256	bdl	100.229		1.91532	0.0218307	0.0846811	0.00234256	0.0870237	-	0.0623022	0.0623022	0.240138	0.00897152	0.838936	0.800857	0.0237247	-		0.410426	0.429988	0.159585		1.87993	0.0474493	0.0246186		0.0237247		0.259219			0.713382	0.103876	0.0117607	0.767762	0.189824	0
	TA	LH17	#313	51.6183	0.768323	2.0983	9.73594	0.393523	15.1859	19.9749	0.343827	bdl	100.119		1.91441	0.0214341	0.0855868	0.00613115	0.091718	-	0.0613115	0.0613115	0.24066	0.012362	0.839618	0.793759	0.024724	-		0.407519	0.43111	0.161372		1.87404	0.0494479	0.0257075		0.024724		0.262134			0.685756	0.105496	0.0124055	0.759958	0.193747	0
	TA	LH17	#314	52.0375	0.777113	1.96561	9.32495	0.375276	15.0013	20.339	0.398739	bdl	100.23		1.92737	0.0216502	0.0726329	0.0131697	0.0858027	-	0.044797	0.044797	0.244039	0.0117729	0.828295	0.807144	0.0286341	-		0.416887	0.427858	0.155256		1.87948	0.0572683	0.0295693		0.0286341		0.264637			0.684	0.0934065	0.011581	0.777537	0.171913	0
	TA	LH17	#316	51.4492	0.796499	2.04478	9.96221	0.440899	15.3583	19.7313	0.333949	bdl	100.134		1.90785	0.0222167	0.0893649	-	0.0893649	0.00278954	0.071731	0.0745205	0.234421	0.0138481	0.849016	0.78396	0.02401	-		0.40083	0.43414	0.16503		1.8674	0.0480199	0.0250702		0.02401		0.256345			0.720919	0.118929	0.0126558	0.748859	0.208206	0
	TA	LH17	#317	52.2383	0.795289	2.32928	7.58105	0.187048	16.075	21.2543	0.301493	0.200384	100.975		1.90692	0.0218372	0.0930824	0.0071295	0.100212	-	0.0578337	0.0578337	0.173601	0.00578337	0.874785	0.83131	0.0213387	0.00578337		0.427761	0.450181	0.122058		1.8797	0.0426773	0.0222003		0.0213387		0.262034			0.71379	0.0887614	0.0107098	0.790596	0.160518	0
	TA	LH17	#322	51.6995	0.839294	2.62981	7.152	0.205613	15.7966	21.5468	0.350872	0.382036	100.609		1.89356	0.0231225	0.106443	0.00707629	0.11352	-	0.0669756	0.0669756	0.15209	0.00637863	0.862511	0.845567	0.0249165	0.0110629		0.437301	0.446112	0.116587		1.86017	0.0498331	0.0260906		0.0249165		0.262898			0.717456	0.0849213	0.0104401	0.796888	0.145393	0
	TA	LH17	#323	51.3446	0.825955	2.84888	7.17059	0.0829174	15.6771	21.2148	0.291177	0.327985	99.784		1.89611	0.0229432	0.103893	0.0201003	0.123993	-	0.0491783	0.0491783	0.172274	0.00259358	0.863064	0.839422	0.0208484	0.0095763		0.435698	0.448018	0.116284		1.87476	0.0416968	0.0217572		0.0208484		0.264582			0.699512	0.0889287	0.011103	0.786284	0.151347	0.00747929
	TA	LH17	#351	51.1454	1.1634	2.25469	11.6158	0.377989	14.8705	17.7666	0.388049	0.0978605	99.835		1.91298	0.0327313	0.0870173	0.012374	0.0993913	-	0.0344277	0.0344277	0.328909	0.0119749	0.829159	0.712005	0.0281409	0.00289392		0.371504	0.432679	0.195817		1.87007	0.0562818	0.0292167		0.0281409		0.265532			0.595972	0.160441	0.0184919	0.672878	0.261894	0
	TA	LH21-2	#7	51.1541	0.950058	1.74045	10.672	0.306236	15.5298	17.7587	0.327627	0.133906	98.575		1.92985	0.0269602	0.0701465	0.00723932	0.0773859	-	0.0289573	0.0289573	0.307746	0.00978557	0.873412	0.717841	0.0239647	0.00399411		0.370438	0.450768	0.178795		1.899	0.0479293	0.0246179		0.0239647		0.259218			0.628985	0.171627	0.0154151	0.684851	0.264101	0
	TA	LH21-2	#21	51.2477	0.729416	1.93252	8.06803	0.287545	16.1597	20.2306	0.295405	0.0880135	99.041		1.90731	0.0204199	0.0847673	-	0.0847673	0.00791892	0.070573	0.0784919	0.172622	0.00906442	0.896581	0.806734	0.0213163	0.00258983		0.410849	0.456655	0.132496		1.87594	0.0426327	0.0222211		0.0213163		0.248321			0.806158	0.121239	0.00980113	0.770692	0.192285	0
	TA	LH21-2	#24	50.4823	0.914779	2.6761	9.63018	0.306619	15.0414	20.3931	0.323133	0.0880463	99.885		1.87589	0.025569	0.117199	-	0.117199	0.00691456	0.0936699	0.100585	0.198682	0.00965054	0.83323	0.811939	0.0232807	0.00258674		0.415492	0.426434	0.158074		1.84385	0.0465614	0.0246303		0.0232807		0.255952			0.733006	0.116474	0.0106139	0.763576	0.189313	0
	TA	LH21-2	#16	52.0331	0.843166	1.07172	14.4348	0.49919	17.4716	13.4096	0.165626	0.044001	99.998		1.94105	0.0236592	0.0471187	-	0.0471187	0.0118296	0.0223115	0.0341411	0.416182	0.0157728	0.971624	0.535975	0.0119793	0.00129776		0.271548	0.49232	0.236132		1.92378	0.0239587	0.0123008		0.0119793		Undef
	TA	LH21-2	#18	48.8473	0.828845	1.47812	11.1242	0.269588	15.7422	17.0947	0.293767	0.120067	95.837		1.89254	0.0241551	0.067495	-	0.067495	0.0399602	0.0775348	0.117495	0.242942	0.00884692	0.909245	0.709642	0.0220676	0.00367793		0.356918	0.457358	0.185724		1.86183	0.0441352	0.0231564		0.0220676		Undef
	TA	LH21-2	#19	50.7523	0.966866	1.5517	10.442	0.269499	16.1329	18.2252	0.33677	0.157786	98.858		1.90344	0.0272759	0.0685879	-	0.0685879	0.0279727	0.0618187	0.0897914	0.237718	0.00856105	0.901996	0.732368	0.0244886	0.00467871		0.371663	0.457796	0.170541		1.87208	0.0489772	0.0254949		0.0244886		Undef
	TA	LH21-2	#20	51.8074	0.879785	1.05961	14.9042	0.459961	17.0548	13.5407	0.2147	bdl	99.98		1.93709	0.0247437	0.0466938	-	0.0466938	0.0162131	0.0279863	0.0441994	0.42184	0.0145669	0.950637	0.542466	0.0155646	-		0.274835	0.481683	0.243482		1.91494	0.0311292	0.0159959		0.0155646		Undef
	TA	LH21-2	#22	51.3386	0.705538	1.81936	8.19519	0.272143	15.9172	20.7029	0.30966	0.0745817	99.352		1.90691	0.0197123	0.0796456	-	0.0796456	0.0134402	0.0737717	0.0872119	0.167355	0.0085619	0.881378	0.823933	0.0223008	0.00219025		0.418554	0.447784	0.133662		1.87267	0.0446015	0.0232631		0.0223008		0.232608			1.03484	0.130312	0.00805069	0.789419	0.177459	0
	TA	LH21-2	#23	50.7465	0.901037	1.71843	10.0716	0.364002	15.8944	18.7559	0.342709	0.208424	99.003		1.9006	0.0253839	0.075853	-	0.075853	0.0235423	0.0673419	0.0908842	0.224573	0.0115472	0.88744	0.752657	0.0248861	0.00617176		0.382607	0.451172	0.166221		1.86467	0.0497723	0.0259983		0.0248861		Undef
	TA	LH21-2	#25	51.0338	0.667356	1.64252	9.04204	0.324699	16.8041	19.0467	0.290579	0.0641664	98.916		1.90103	0.018699	0.0721106	-	0.0721106	0.026855	0.0806644	0.107519	0.17416	0.0102447	0.933161	0.760195	0.0209867	0.0018898		0.382899	0.470071	0.14703		1.86752	0.0419733	0.0219815		0.0209867		Undef
	TA	LH21-2	#26	50.2283	0.91219	1.69952	10.2968	0.336495	15.6011	18.9505	0.315778	0.160217	98.503		1.89331	0.0258636	0.0755017	-	0.0755017	0.0311855	0.0732635	0.104449	0.220139	0.0107433	0.876676	0.765363	0.0230783	0.00477481		0.387046	0.443385	0.169569		1.86218	0.0461565	0.0241868		0.0230783		Undef
	TA	LH21-2	#27	49.8045	0.899528	2.56882	8.9601	0.260014	15.389	20.4976	0.268234	0.147667	98.808		1.86571	0.0253467	0.113414	-	0.113414	0.0208737	0.0987028	0.119577	0.161125	0.00825009	0.859401	0.822723	0.0194821	0.00437354		0.417381	0.436036	0.146583		1.84325	0.0389643	0.0207013		0.0194821		Undef
	TA	LH21-2	#28	52.0479	0.28887	0.786919	11.524	0.441114	13.8218	20.3117	0.360807	bdl	99.615		1.95852	0.00817629	0.0348988	-	0.0348988	0.00658092	0.0507528	0.0573337	0.305315	0.0140592	0.775351	0.818925	0.0263237	-		0.415477	0.393413	0.191111		1.89959	0.0526473	0.0269677		0.0263237		0.24197			0.907799	0.104631	0.00783182	0.806528	0.168487	0
	TA	LH21-2	#29	52.4564	0.32796	0.880477	10.8662	0.443205	14.5243	20.6389	0.320851	bdl	100.482		1.94987	0.00916974	0.0385727	-	0.0385727	0.0115618	0.0542211	0.0657829	0.272002	0.013954	0.804844	0.821987	0.0231237	-		0.41543	0.40681	0.177759		1.89883	0.0462474	0.0237766		0.0231237		Undef
	TA	LH21-2	#31	51.5906	0.352559	1.00355	11.289	0.425809	14.0142	20.6396	0.351518	bdl	99.687		1.93688	0.00995619	0.0444046	-	0.0444046	0.0187176	0.0681999	0.0869176	0.267523	0.0135404	0.784349	0.830247	0.0255874	-		0.418757	0.395651	0.185592		1.88212	0.0511748	0.0264703		0.0255874		Undef
	TA	LH21-2	#32	51.4831	0.909259	1.68859	10.1058	0.326158	15.9513	18.8419	0.344452	0.176403	99.827		1.91281	0.0254111	0.0739412	-	0.0739412	0.0132536	0.056004	0.0692576	0.244743	0.0102641	0.883508	0.750075	0.0248132	0.00518186		0.383096	0.451296	0.165608		1.87833	0.0496263	0.0257404		0.0248132		Undef
	TA	LH21-2	#33	51.8794	0.338541	0.981298	11.092	0.46976	14.1832	20.1819	0.363919	bdl	99.5		1.94951	0.00956914	0.0434598	-	0.0434598	0.00702734	0.0575644	0.0645917	0.283984	0.0149518	0.794538	0.812579	0.0265145	-		0.412328	0.403217	0.184456		1.8911	0.053029	0.0272765		0.0265145		0.244349			0.869264	0.108219	0.00837072	0.796858	0.176221	0
	TA	LH21-2	#34	51.2789	0.971292	1.81641	10.0595	0.352004	15.6935	19.4962	0.300624	0.169866	100.153		1.9013	0.0270889	0.0793746	-	0.0793746	0.0193208	0.0611493	0.0804701	0.231451	0.0110547	0.867443	0.774524	0.0216114	0.00497958		0.394156	0.44149	0.164354		1.87342	0.0432228	0.0225513		0.0216114		Undef
	TA	LH26-1	#1	51.3245	0.664078	1.96504	8.81577	0.182915	15.2503	20.7224	0.321008	bdl	99.246		1.9146	0.0186338	0.0853968	0.000996463	0.0863933	-	0.0703503	0.0703503	0.204673	0.00577948	0.848089	0.82826	0.0232176	-		0.423179	0.433358	0.143462		1.88102	0.0464352	0.0240914		0.0232176		0.260116			0.625841	0.0721827	0.00746598	0.796091	0.166823	0
	TA	LH26-1	#2	51.538	0.585523	2.33846	6.78175	0.169074	16.6242	20.8629	0.239699	0.358839	99.526		1.90056	0.0162415	0.099442	0.00219211	0.101634	-	0.0714428	0.0714428	0.137704	0.00528099	0.91391	0.824332	0.0171383	0.0104623		0.422137	0.468061	0.109802		1.87595	0.0342766	0.0179438		0.0171383		0.26173			0.60838	0.0779702	0.0081471	0.780171	0.174867	0
	TA	LH26-1	#3	51.7871	0.471291	2.00909	6.54941	0.182111	16.9219	21.1322	0.216338	0.318314	99.594		1.90589	0.0130465	0.0871427	-	0.0871427	0.00697142	0.0741958	0.0811672	0.120406	0.00567673	0.928394	0.833284	0.0154367	0.00926203		0.423197	0.471552	0.10525		1.88208	0.0308734	0.0161391		0.0154367		0.252652			0.682939	0.0786403	0.00721029	0.793773	0.171959	0
	TA	LH26-1	#4	52.0952	0.47028	2.07331	6.60515	0.125291	17.2034	20.929	0.24841	0.261566	100.016		1.90673	0.0129472	0.0894356	-	0.0894356	0.00383437	0.0774345	0.0812688	0.120907	0.00388417	0.938675	0.820755	0.0176282	0.00756916		0.417563	0.477608	0.104829		1.88034	0.0352563	0.0184049		0.0176282		0.257244			0.635864	0.080323	0.00784621	0.782437	0.183106	0
	TA	LH26-1	#5	51.5682	0.557755	2.17948	6.48286	0.143803	16.9491	21.0559	0.273622	0.356041	99.588		1.89648	0.015429	0.0944655	-	0.0944655	0.00905833	0.0818236	0.0908819	0.108501	0.00447939	0.929226	0.829683	0.0195103	0.0103524		0.422691	0.473455	0.103854		1.86741	0.0390205	0.0204678		0.0195103		0.25215			0.684582	0.0825792	0.00745781	0.786423	0.175446	0
	TA	LH26-1	#16	51.8189	0.56116	1.66983	8.41005	0.21267	15.8903	20.8443	0.244052	bdl	99.67		1.92034	0.0156425	0.072932	-	0.072932	0.00672528	0.0656089	0.0723342	0.188308	0.00667547	0.877874	0.827658	0.0175356	-		0.419507	0.445007	0.135486		1.89384	0.0350711	0.0181818		0.0175356		0.250303			0.703104	0.0782494	0.00693228	0.798582	0.173439	0
	TA	LH26-1	#28	51.3268	0.778428	2.32838	9.01485	0.25804	15.4357	20.862	0.336788	bdl	100.341		1.89344	0.0216001	0.101232	-	0.101232	0.00532537	0.0874456	0.0927709	0.185343	0.00806271	0.848874	0.824586	0.0240886	-		0.420768	0.433209	0.146022		1.8588	0.0481772	0.0252636		0.0240886		0.25767			0.638476	0.0787584	0.00776408	0.785108	0.17533	0
	TA	LH26-1	#30	52.3095	0.553638	1.67724	8.62062	0.213906	15.756	20.8721	0.278944	bdl	100.282		1.92871	0.0153547	0.0712897	0.00159529	0.072885	-	0.0589262	0.0589262	0.20689	0.00668029	0.866045	0.824568	0.0199412	-		0.420014	0.44119	0.138796		1.8975	0.0398823	0.0205857		0.0199412		0.258825			0.633519	0.0723413	0.00734611	0.79775	0.169848	0
	TA	LH26-1	#31	51.3269	0.603862	2.15961	7.9639	0.212603	15.898	20.9206	0.303583	0.135977	99.525		1.90138	0.0168264	0.0942875	-	0.0942875	0.00433105	0.0827878	0.0871189	0.159602	0.00667082	0.877959	0.830367	0.0218046	0.00398258		0.423268	0.447576	0.129156		1.86793	0.0436092	0.0228137		0.0218046		0.257622			0.6425	0.0756495	0.0074998	0.792077	0.170414	0
	TA	LH26-1	#35	51.9232	0.567638	1.97191	8.05259	0.236097	16.0047	20.8809	0.288514	0.102539	100.028		1.91456	0.0157437	0.0854445	0.000249109	0.0856936	-	0.0713449	0.0713449	0.176967	0.00737364	0.879755	0.824951	0.0206263	0.00298931		0.420791	0.448795	0.130414		1.88167	0.0412525	0.021453		0.0206263		0.259642			0.625955	0.0745214	0.00761898	0.791384	0.171715	0
	TA	LH26-1	#43	51.2524	0.707419	2.0568	8.85012	0.244313	15.5468	20.9011	0.303556	bdl	99.904		1.8979	0.0197044	0.0897646	-	0.0897646	0.0123402	0.0838931	0.0962333	0.177837	0.00766284	0.858238	0.829278	0.0217943	-		0.421097	0.43585	0.143054		1.86535	0.0435886	0.0228339		0.0217943		0.246703			0.737237	0.0843626	0.00698959	0.79245	0.174554	0
	TA	LH26-1	#44	52.3201	0.591093	1.95568	7.92263	0.267294	16.4731	20.8832	0.282779	0.169051	100.865		1.9106	0.0162363	0.0841696	-	0.0841696	0.00522947	0.0720671	0.0772966	0.164654	0.00826755	0.89678	0.817093	0.0200214	0.00488084		0.415998	0.456618	0.127384		1.87853	0.0400428	0.0208712		0.0200214		0.254493			0.658727	0.0830362	0.00775552	0.781428	0.182343	0
	TA	LH26-1	#50	51.8597	0.510195	1.84365	7.53293	0.175491	16.3703	21.0742	0.305263	0.17433	99.846		1.91049	0.0141378	0.0800478	-	0.0800478	0.00945838	0.077957	0.0874154	0.144663	0.00547591	0.899044	0.83184	0.0218041	0.00507766		0.42257	0.456759	0.120671		1.87555	0.0436081	0.0227226		0.0218041		0.249722			0.710711	0.0791693	0.00693961	0.797643	0.17089	0
	TA	LH26-1	#56	52.209	0.519972	1.97272	7.28159	0.202023	16.4104	21.1924	0.273171	0.171768	100.233		1.91554	0.0143501	0.0844565	0.000847056	0.0853036	-	0.069359	0.069359	0.154065	0.00627818	0.897581	0.833105	0.0194325	0.00498269		0.424951	0.457889	0.117161		1.88475	0.0388649	0.0202041		0.0194325		0.259785			0.630037	0.071268	0.00735219	0.798782	0.16437	0
	TA	LH26-1	#61	52.2281	0.51612	1.7783	7.27495	0.217955	16.9545	20.6479	0.264642	0.144218	100.033		1.91637	0.0142448	0.076902	-	0.076902	0.00672394	0.0697796	0.0765035	0.146731	0.00677375	0.927406	0.811754	0.018827	0.00418379		0.412213	0.470993	0.116794		1.88589	0.0376541	0.0195753		0.018827		0.251914			0.674872	0.0863704	0.00771822	0.779237	0.189408	0
	TA	LH26-1	#62	51.9575	0.612523	2.10181	7.1556	0.185586	16.4075	21.1742	0.282363	0.0856975	99.967		1.91013	0.0169382	0.089872	0.00119564	0.0910676	-	0.0724356	0.0724356	0.147561	0.00577891	0.899218	0.834056	0.0201265	0.00249091		0.425726	0.459037	0.115237		1.88083	0.0402531	0.0209533		0.0201265		0.260598			0.62442	0.0707488	0.00738999	0.798762	0.163634	0
	TA	LH26-1	#63	50.673	0.780943	2.28592	8.96216	0.160772	14.1586	22.3435	0.353926	bdl	99.771		1.88775	0.0218835	0.100366	-	0.100366	0.0118867	0.0932534	0.10514	0.174073	0.00507299	0.786313	0.891851	0.0255639	-		0.454441	0.400708	0.14485		1.85224	0.0511277	0.0268618		0.0255639		0.250488			0.744998	0.056012	0.00524419	0.851735	0.111658	0
	TA	LH26-1	#64	51.1382	0.749209	2.36122	8.27898	0.221782	14.7989	21.9078	0.31419	0.0407305	99.811		1.89801	0.0209163	0.101992	0.00129482	0.103287	-	0.0802789	0.0802789	0.176693	0.00697211	0.818825	0.871215	0.0226096	0.00119522		0.445849	0.419083	0.135068		1.86673	0.0452191	0.0236508		0.0226096		0.261278			0.642386	0.0576911	0.00628079	0.831877	0.125583	0
	TA	LH26-1	#69	52.2854	0.61319	1.78411	7.94203	0.192195	16.4581	20.6022	0.286869	0.0789276	100.243		1.92081	0.0169445	0.077247	-	0.077247	0.00194363	0.0634422	0.0653859	0.178615	0.00598041	0.901348	0.810944	0.0204331	0.00229249		0.41325	0.459369	0.127382		1.89091	0.0408662	0.0211547		0.0204331		0.256296			0.641175	0.0822793	0.00789918	0.779901	0.185861	0
	TA	LH26-1	#92	51.3615	0.651767	1.89348	9.03686	0.234054	15.753	20.3527	0.225222	bdl	99.512		1.90989	0.0182303	0.0829826	-	0.0829826	0.00712276	0.0697831	0.0769058	0.204119	0.0073718	0.87326	0.810898	0.0162379	-		0.411073	0.442735	0.146191		1.88828	0.0324758	0.0169078		0.0162379		0.251214			0.678523	0.0880639	0.00776404	0.777185	0.192272	0
	TA	LH26-1	#93	52.3553	0.584146	1.77433	9.08758	0.259379	16.3437	19.7425	0.300765	bdl	100.482		1.92424	0.0161491	0.0757614	0.00109655	0.0768579	-	0.0628022	0.0628022	0.216518	0.00807457	0.895479	0.777451	0.0214325	-		0.396576	0.456832	0.146592		1.88945	0.042865	0.0221832		0.0214325		0.25972			0.590307	0.0951127	0.00936905	0.748221	0.216379	0
	TA	LH26-1	#110	52.0669	0.527418	1.47836	8.91711	0.325968	15.2911	20.6472	0.337339	bdl	99.604		1.93688	0.0147579	0.0631201	0.00169517	0.0648153	-	0.0562397	0.0562397	0.22117	0.0102707	0.847983	0.822955	0.0243307	-		0.420154	0.43298	0.146866		1.89211	0.0486613	0.0250732		0.0243307		0.258538			0.638906	0.0716124	0.00725425	0.79992	0.165414	0
	TA	LH26-1	#112	51.5829	0.554327	1.85284	7.84952	0.274539	15.7114	20.6252	0.365317	0.0608511	98.879		1.92365	0.0155495	0.0763519	0.00508348	0.0814353	-	0.0647894	0.0647894	0.180015	0.00867182	0.873461	0.824122	0.0264142	0.00179417		0.422379	0.447716	0.129905		1.8776	0.0528283	0.0273661		0.0264142		0.262735			0.608094	0.0710411	0.0076363	0.794754	0.164796	0
	TA	LH26-1	#113	51.9879	0.622979	1.57223	8.58431	0.306655	15.3989	20.5755	0.306599	bdl	99.355		1.93724	0.0174616	0.0627619	0.00628617	0.0690481	-	0.0437039	0.0437039	0.223808	0.00967871	0.855418	0.821493	0.0221513	-		0.420377	0.437785	0.141838		1.90072	0.0443025	0.0227774		0.0221513		0.260834			0.621613	0.0714739	0.00747811	0.796655	0.16519	0
	TA	LH26-1	#116	51.9125	0.566367	1.62548	8.27558	0.31317	15.4766	20.7931	0.344098	bdl	99.339		1.93185	0.0158536	0.0681507	0.00314081	0.0712915	-	0.057432	0.057432	0.200115	0.00987113	0.858589	0.829075	0.0248274	-		0.424044	0.439187	0.136768		1.88778	0.0496548	0.0256291		0.0248274		0.260051			0.631592	0.0692095	0.00719937	0.803341	0.159099	0
	TA	LH26-1	#117	51.7164	0.591411	1.95132	7.50519	0.149605	16.2243	21.0513	0.266986	0.150042	99.613		1.91099	0.0164379	0.0849792	-	0.0849792	0.00403477	0.0708824	0.0749172	0.157007	0.00468232	0.893726	0.833454	0.0191278	0.00438345		0.424393	0.455133	0.120474		1.88419	0.0382556	0.0198995		0.0191278		0.255449			0.66243	0.0745782	0.00718298	0.798025	0.167363	0
	TA	LH26-1	#118	50.926	0.585699	2.13637	7.48699	0.226969	16.1035	20.8131	0.279556	0.138462	98.705		1.89833	0.0164224	0.0938565	-	0.0938565	0.00781308	0.0849486	0.0927617	0.140635	0.00716614	0.894872	0.831272	0.0202045	0.00408072		0.422654	0.45504	0.122306		1.86678	0.0404091	0.0211878		0.0202045		0.25444			0.667089	0.0779213	0.0073451	0.792311	0.172393	0
	TA	LH26-1	#129	52.118	0.582913	1.60224	8.15395	0.16832	16.5213	19.9791	0.201172	bdl	99.344		1.93305	0.0162626	0.066946	0.00309289	0.0700389	-	0.0452958	0.0452958	0.207622	0.00528784	0.913499	0.793974	0.0144667	-		0.403901	0.464755	0.131345		1.9151	0.0289335	0.0148832		0.0144667		0.258456			0.611488	0.0867619	0.00851828	0.766921	0.201958	0
	TA	LH26-1	#154	52.415	0.521821	1.63534	7.90123	0.178972	16.5149	20.3631	0.261082	0.133528	99.942		1.93118	0.0144617	0.0688176	0.00219419	0.0710118	-	0.052461	0.052461	0.190994	0.0055852	0.907096	0.80387	0.0186506	0.00388969		0.410118	0.462833	0.127049		1.90196	0.0373012	0.0192347		0.0186506		0.258793			0.618499	0.0823983	0.00819444	0.775396	0.190142	0
	TA	LH26-1	#73	52.2654	0.507077	1.4001	9.17997	0.236336	15.9629	20.6092	0.30555	bdl	100.481		1.92402	0.014041	0.0607449	-	0.0607449	0.015236	0.0694085	0.0846445	0.197969	0.00736905	0.876021	0.812886	0.0218084	-		0.410762	0.442713	0.146525		1.88688	0.0436168	0.0225936		0.0218084		Undef
	TA	LH26-1	#98	50.0651	0.737816	2.36573	9.06211	0.26648	15.5948	20.2925	0.361567	bdl	98.783		1.87276	0.0207599	0.104296	-	0.104296	0.0229451	0.110852	0.133797	0.14969	0.00844301	0.86963	0.81331	0.026223	-		0.411813	0.440378	0.147809		1.83263	0.052446	0.0278217		0.026223		Undef
	TA	LH26-2	#188	51.4268	0.63492	1.79294	8.94577	0.296099	15.6905	19.8713	0.322006	bdl	99.004		1.92116	0.0178411	0.0788398	9.96711e-05	0.0789395	-	0.0656832	0.0656832	0.213794	0.00936908	0.873816	0.795375	0.023323	-		0.406193	0.446302	0.147505		1.88299	0.0466461	0.0241736		0.023323		0.258932			0.611865	0.0871653	0.00860914	0.765269	0.197186	0
	TA	LH26-2	#192	50.4942	0.90826	2.64831	9.79672	0.31631	15.028	20.4441	0.353747	bdl	99.998		1.87425	0.0253586	0.115854	-	0.115854	0.00989484	0.10049	0.110385	0.19372	0.00994456	0.831564	0.813067	0.0254581	-		0.415094	0.424583	0.160323		1.83835	0.0509161	0.0269502		0.0254581		0.256034			0.640006	0.0891126	0.00841708	0.766501	0.189875	0
	TA	LH26-2	#207	50.9598	0.83516	2.33797	8.75945	0.210088	15.7707	20.9586	0.339302	bdl	100.189		1.87892	0.0231622	0.101596	-	0.101596	0.0194841	0.0986133	0.118097	0.151996	0.00656096	0.866842	0.827974	0.0242557	-		0.419961	0.439723	0.140316		1.84681	0.0485114	0.0255953		0.0242557		0.217673			1.16143	0.128465	0.00598189	0.78483	0.181712	0
	TA	LH26-2	#208	51.629	0.704385	2.03447	8.69197	0.226598	15.9282	20.7261	0.330434	bdl	100.303		1.90073	0.0195059	0.0882741	-	0.0882741	0.0109969	0.0838454	0.0948424	0.172766	0.00706591	0.874182	0.817555	0.0235862	-		0.415743	0.444587	0.13967		1.8645	0.0471724	0.0246759		0.0235862		0.249834			0.698049	0.08674	0.00750775	0.782227	0.184402	0
	TA	LH26-2	#210	53.3091	0.441715	1.56101	7.43372	0.233417	17.2314	20.6586	0.185528	bdl	101.081		1.93675	0.012071	0.0632482	0.00359138	0.0668396	-	0.0478851	0.0478851	0.177973	0.00718276	0.93326	0.80417	0.0130686	-		0.408092	0.473653	0.118255		1.9154	0.0261373	0.0134621		0.0130686		0.259259			0.613399	0.0802059	0.00806278	0.779312	0.19223	0
	TA	LH26-2	#229	51.9094	0.499089	2.00514	7.22118	0.172187	16.6621	20.6495	0.267453	0.122976	99.509		1.91525	0.0138512	0.0847513	0.00244139	0.0871926	-	0.0701527	0.0701527	0.152662	0.00538103	0.916469	0.816322	0.0191326	0.00358735		0.416262	0.467381	0.116357		1.88545	0.0382651	0.0198912		0.0191326		0.261542			0.604827	0.0770401	0.00804432	0.782574	0.181705	0
	TA	LH26-2	#230	51.8823	0.508493	1.98402	7.3502	0.20497	16.8663	20.8591	0.261631	0.10293	100.037		1.90346	0.0140326	0.0857882	-	0.0857882	0.0107484	0.0840963	0.0948447	0.130673	0.00636943	0.922472	0.819964	0.0186107	0.00298567		0.415295	0.467265	0.11744		1.87311	0.0372213	0.0194842		0.0186107		0.250092			0.693902	0.0853799	0.00743734	0.784425	0.186394	0
	TA	LH26-2	#231	52.6043	0.497665	1.72026	6.33204	0.109683	17.1486	21.7072	0.239578	0.0656636	100.425		1.91753	0.0136454	0.0739044	-	0.0739044	0.00856574	0.0702191	0.0787849	0.114243	0.00338645	0.931873	0.847809	0.0169323	0.00189243		0.429012	0.471602	0.0993856		1.89392	0.0338645	0.0175665		0.0169323		0.248183			0.736801	0.0711577	0.00619535	0.817561	0.157387	0
	TA	LH26-2	#189	49.9047	0.88381	2.41359	9.7831	0.359606	15.059	20.1465	0.331951	bdl	98.896		1.87268	0.0249466	0.106744	-	0.106744	0.0205735	0.101476	0.122049	0.184962	0.0114297	0.842419	0.810018	0.0241515	-		0.410978	0.427463	0.161559		1.8374	0.0483029	0.0256153		0.0241515		Undef
	TA	LH26-2	#193	51.073	0.693316	1.75862	8.81671	0.217866	15.6901	20.832	0.321392	bdl	99.403		1.89935	0.0193943	0.0770799	-	0.0770799	0.0235715	0.0850366	0.108608	0.165597	0.0068626	0.869859	0.830076	0.0231737	-		0.419001	0.43913	0.141869		1.86553	0.0463474	0.0242418		0.0231737		Undef
	TA	LH27-2	#5	52.5458	0.520864	1.51312	8.31968	0.242445	16.1276	20.3838	0.273146	bdl	99.952		1.94038	0.0144678	0.0596174	0.00623612	0.0658535	-	0.0435032	0.0435032	0.213425	0.00758313	0.887825	0.806506	0.0195565	-		0.411708	0.45327	0.135022		1.90776	0.039113	0.0200902		0.0195565		0.257041			0.638005	0.0754207	0.00919041	0.78297	0.182993	0
	TA	LH27-2	#6	52.6589	0.569808	1.62959	8.20664	0.243405	16.1714	20.5303	0.289617	bdl	100.306		1.93684	0.0157645	0.0631579	0.00748316	0.0706411	-	0.0447992	0.0447992	0.207633	0.00758294	0.886705	0.80908	0.0206535	-		0.413665	0.453402	0.132933		1.90342	0.0413071	0.0212406		0.0206535		0.258191			0.631647	0.0740497	0.00919839	0.784206	0.179614	0
	TA	LH27-2	#10	52.3017	0.600382	1.87665	8.214	0.298708	15.9643	21.2394	0.296064	bdl	100.813		1.91508	0.0165359	0.0809862	-	0.0809862	0.00393475	0.0726684	0.0766032	0.174922	0.0092641	0.871423	0.833271	0.0210186	-		0.423934	0.443393	0.132672		1.87962	0.0420371	0.0218755		0.0210186		0.252072			0.694949	0.0706301	0.00808854	0.802321	0.163954	0
	TA	LH27-2	#38	51.9504	0.64688	1.92666	8.34929	0.287235	16.2001	20.3829	0.29	bdl	100.062		1.91495	0.0179359	0.0837008	-	0.0837008	0.00134519	0.0695015	0.0708467	0.186533	0.00896794	0.890217	0.805022	0.0207259	-		0.410376	0.453855	0.135769		1.88177	0.0414518	0.0215533		0.0207259		0.254384			0.653097	0.0821315	0.00950381	0.77287	0.190805	0
	TA	LH27-2	#49	51.2524	0.755892	2.36208	8.08481	0.0759939	14.1064	22.8684	0.331984	bdl	99.889		1.90424	0.021125	0.0957601	0.00767276	0.103433	-	0.0690549	0.0690549	0.182153	0.00239151	0.781326	0.910368	0.0239151	-		0.467967	0.401678	0.130354		1.87385	0.0478302	0.0248898		0.0239151		0.259949			0.672903	0.0423404	0.00588509	0.873121	0.0827514	0
	TA	LH27-2	#51	52.5029	0.578531	2.03078	7.77932	0.20872	16.1335	20.8734	0.274945	0.0928807	100.475		1.92607	0.0159641	0.0739336	0.0138688	0.0878024	-	0.0449988	0.0449988	0.193664	0.00648541	0.882315	0.820454	0.019556	0.00269394		0.421177	0.452983	0.12584		1.89643	0.039112	0.0202072		0.019556		0.261215			0.616894	0.0704309	0.00919776	0.787938	0.168629	0.00181959
	TA	LH27-2	#52	52.9028	0.522559	1.59807	7.79763	0.219142	16.8509	20.5004	0.244965	bdl	100.671		1.93298	0.0143619	0.0670224	0.00179524	0.0688176	-	0.0528599	0.0528599	0.185409	0.00678203	0.917868	0.802573	0.017354	-		0.408314	0.467021	0.124665		1.90585	0.034708	0.0178856		0.017354		0.254343			0.65206	0.0805061	0.00933939	0.776388	0.192432	0
	TA	LH27-2	#63	52.4038	0.508605	2.26759	6.43387	0.170991	17.161	20.9133	0.242417	0.245395	100.347		1.91187	0.0139574	0.0881312	0.00937142	0.0975026	-	0.0609142	0.0609142	0.135387	0.00528388	0.933353	0.817507	0.0171477	0.00707841		0.418689	0.478073	0.103238		1.88625	0.0342954	0.0178571		0.0171477		0.259852			0.619657	0.0756479	0.00958619	0.777738	0.17884	0.00238852
	TA	LH27-2	#77	51.4746	0.740785	2.3823	8.82354	0.188417	16.0452	20.3149	0.283207	bdl	100.306		1.89452	0.0205082	0.103338	-	0.103338	0.00214042	0.0846711	0.0868115	0.184773	0.00587372	0.88036	0.801115	0.0202096	-		0.408937	0.449438	0.141624		1.86625	0.0404191	0.0211988		0.0202096		0.256696			0.627239	0.0856104	0.0101764	0.761484	0.199549	0
	TA	LH27-2	#79	52.255	0.610084	1.95146	7.90959	0.134647	16.3332	20.8193	0.289905	bdl	100.317		1.91812	0.0168448	0.0818818	0.00254168	0.0844235	-	0.0658842	0.0658842	0.176921	0.00418629	0.893773	0.818818	0.0206324	-		0.417835	0.456134	0.126031		1.88951	0.0412649	0.0213722		0.0206324		0.256969			0.642687	0.0735089	0.00898449	0.787492	0.17768	0
	TA	LH27-2	#80	51.7072	0.736417	2.27893	8.13255	0.18503	15.8399	20.8157	0.277336	0.0683526	100.052		1.90754	0.0204351	0.0924565	0.00662895	0.0990854	-	0.0628006	0.0628006	0.188103	0.00578164	0.871134	0.822788	0.019837	0.00199367		0.421793	0.446626	0.13158		1.88202	0.039674	0.0206453		0.019837		0.259768			0.625611	0.0726197	0.00925081	0.784978	0.171505	0
	TA	LH27-2	#92	51.6688	0.576658	2.28873	6.88536	0.134429	15.4338	23.0552	0.289435	bdl	100.353		1.8968	0.0159236	0.0990247	-	0.0990247	0.00417994	0.0913615	0.0955414	0.115844	0.00417994	0.844646	0.906847	0.0206011	-		0.460998	0.429424	0.109578		1.86734	0.0412022	0.0215884		0.0206011		0.254251			0.716656	0.045291	0.00574283	0.869833	0.0973365	0
	TA	LH27-2	#126	51.9565	0.640134	2.14603	8.09304	0.287433	15.9899	20.6721	0.266481	0.0513212	100.103		1.91505	0.0177476	0.0849494	0.00827559	0.093225	-	0.0587268	0.0587268	0.190737	0.00897353	0.878608	0.816392	0.0190438	0.00149559		0.417908	0.449805	0.132287		1.88574	0.0380876	0.0197979		0.0190438		0.260393			0.617825	0.0734896	0.00942569	0.781889	0.175865	0
	TA	LH27-2	#127	52.0681	0.649089	1.98847	8.01128	0.204953	16.2172	20.8043	0.327363	0.0411687	100.312		1.91238	0.0179323	0.0860751	-	0.0860751	0.00154417	0.0738711	0.0754153	0.170656	0.00637593	0.887948	0.818709	0.023312	0.00119549		0.417882	0.453272	0.128846		1.87731	0.046624	0.0242336		0.023312		0.254673			0.661321	0.0760656	0.00894612	0.785523	0.177834	0
	TA	LH27-2	#128	52.1829	0.65179	1.92596	8.02609	0.233451	16.0221	20.8665	0.282204	bdl	100.215		1.92093	0.0180477	0.0790707	0.00448699	0.0835577	-	0.057932	0.057932	0.189151	0.00727889	0.87925	0.823013	0.0201416	-		0.420611	0.449401	0.129989		1.89141	0.0402832	0.0208538		0.0201416		0.257415			0.644905	0.0713776	0.00882015	0.791779	0.170009	0
	TA	LH27-2	#129	51.9584	0.607569	1.97095	7.60859	0.19156	16.0808	21.1979	0.277552	0.058145	99.96		1.91475	0.0168415	0.0852537	0.000348788	0.0856025	-	0.069359	0.069359	0.165126	0.00597922	0.88343	0.836991	0.0198311	0.00169411		0.426825	0.450556	0.122619		1.88555	0.0396622	0.0206015		0.0198311		0.255344			0.669038	0.0677108	0.0081897	0.804004	0.160224	0
	TA	LH27-2	#133	51.1129	0.63833	2.15762	7.81346	0.209016	16.0537	20.9243	0.286382	0.071247	99.267		1.8964	0.0178145	0.0943471	-	0.0943471	0.00925557	0.0864849	0.0957404	0.146696	0.00656847	0.887938	0.831807	0.0206011	0.00208997		0.422487	0.451046	0.126467		1.86644	0.0412022	0.0215985		0.0206011		0.248978			0.716485	0.0770132	0.00830423	0.793268	0.173098	0
	TA	LH27-2	#134	51.4873	0.650981	2.28053	7.81123	0.161998	16.0767	20.5378	0.320547	0.0646555	99.415		1.90679	0.0181343	0.0932121	0.00632706	0.0995392	-	0.0717399	0.0717399	0.170183	0.00508158	0.887583	0.814946	0.0230166	0.00189314		0.418003	0.45531	0.126688		1.87271	0.0460331	0.0239913		0.0230166		0.260719			0.613084	0.0748351	0.00961427	0.778186	0.179108	0
	TA	LH27-2	#151	51.3624	0.646563	2.10408	8.19598	0.217687	15.593	20.4782	0.348693	bdl	98.95		1.91592	0.0181415	0.0840788	0.00842284	0.0925017	-	0.064492	0.064492	0.191183	0.00687782	0.867104	0.81846	0.0252187	-		0.420111	0.445128	0.13476		1.87675	0.0504373	0.0261715		0.0252187		0.261031			0.616284	0.0713566	0.00927609	0.785969	0.171438	0
	TA	LH27-2	#152	51.5547	0.77559	2.2825	8.31628	0.261478	15.7188	20.8418	0.362188	bdl	100.126		1.90086	0.0215102	0.0991361	4.97921e-05	0.0991859	-	0.0819578	0.0819578	0.174472	0.00816591	0.863993	0.823362	0.0258919	-		0.421798	0.44266	0.135542		1.86183	0.0517838	0.0270608		0.0258919		0.257247			0.645471	0.0739174	0.00906237	0.786082	0.171051	0
	TA	LH27-2	#153	51.2911	0.819868	2.34896	8.70419	0.257536	15.8824	20.2531	0.306961	bdl	99.871		1.89701	0.0228088	0.10239	-	0.10239	0.00059761	0.0791833	0.0797809	0.189442	0.00806773	0.875697	0.80259	0.022012	-		0.410393	0.447825	0.141782		1.86773	0.0440239	0.023028		0.022012		0.256629			0.63161	0.0850737	0.0101129	0.762715	0.194934	0
	TA	LH27-2	#155	51.3815	0.828376	2.41329	8.63583	0.288553	15.5461	20.1837	0.289513	bdl	99.605		1.90814	0.0231398	0.0918612	0.0137642	0.105625	-	0.0516657	0.0516657	0.216537	0.0090764	0.860662	0.803112	0.0208458	-		0.413733	0.44343	0.142837		1.88031	0.0416916	0.0216917		0.0208458		0.262337			0.59718	0.0800548	0.0104053	0.763523	0.185121	0.00156955
	TA	LH27-2	#160	51.7108	0.649969	2.15618	7.83762	0.199805	15.5778	20.9295	0.289568	0.0475668	99.401		1.9203	0.0181555	0.0797047	0.0146641	0.0943688	-	0.048182	0.048182	0.195222	0.0062846	0.862387	0.83276	0.0208489	0.00139658		0.428172	0.443454	0.128374		1.89037	0.0416978	0.021582		0.0208489		0.26181			0.621013	0.0658762	0.00876511	0.798514	0.155872	0.00186978
	TA	LH27-2	#171	52.0484	0.650572	2.06452	7.62648	0.2311	16.6154	20.7352	0.283241	0.106596	100.37		1.90697	0.0179292	0.0891479	-	0.0891479	0.00388466	0.0742069	0.0780915	0.155585	0.00717167	0.907515	0.813985	0.0201205	0.0030878		0.414783	0.462494	0.122723		1.87709	0.040241	0.0209881		0.0201205		0.252736			0.671475	0.0812966	0.0091969	0.777551	0.185577	0
	TA	LH27-2	#180	51.677	0.642442	2.12341	8.05747	0.210362	15.9887	21.0188	0.207467	0.0443893	99.97		1.90738	0.0178362	0.0923698	-	0.0923698	0.000249109	0.070498	0.0707471	0.177964	0.00657649	0.879755	0.831228	0.0148469	0.00129537		0.422726	0.447453	0.129821		1.88895	0.0296938	0.0154765		0.0148469		0.255056			0.664091	0.0717138	0.00856017	0.794853	0.170153	0
	TA	LH27-2	#184	51.022	0.567178	2.21943	9.82028	0.122774	12.2628	24.1743	0.250296	bdl	100.456		1.90626	0.0159394	0.0937438	0.00398486	0.0977286	-	0.0755131	0.0755131	0.231321	0.00388524	0.683005	0.967723	0.0181311	-		0.493357	0.348242	0.158401		1.88205	0.0362622	0.0189032		0.0181311		0.257369			0.708543	0.0289789	0.00412244	0.932764	0.0316714	0
	TA	LH27-2	#185	49.6701	0.453423	2.21126	13.614	0.126026	9.72941	23.7037	0.349131	bdl	99.857		1.89784	0.0130316	0.0995772	-	0.0995772	0.00258642	0.101965	0.104551	0.330465	0.00407859	0.55419	0.970405	0.0258642	-		0.494165	0.282244	0.223591		1.85506	0.0517284	0.0271285		0.0258642		0.256089			0.720306	0.0285448	0.00399644	0.936193	0.0308541	0
	TA	LH27-2	#15	50.6047	0.518839	1.5144	8.45599	0.282601	14.8906	19.975	0.295221	bdl	96.564		1.94092	0.0149686	0.0590759	0.0093803	0.0684562	-	0.0412135	0.0412135	0.230017	0.00918072	0.851412	0.820876	0.0219539	-		0.420363	0.436048	0.143589		1.90231	0.0439078	0.0225606		0.0219539		0.25898			0.636494	0.0680699	0.00866374	0.797336	0.164611	0
	TA	LH27-2	#70	52.3503	0.371419	1.1717	8.80355	0.351833	15.0836	20.2415	0.344454	bdl	98.748		1.96534	0.0104885	0.0346619	0.0171811	0.051843	-	0.0213765	0.0213765	0.255019	0.0111877	0.844171	0.814204	0.0250724	-		0.418391	0.433837	0.147772		1.9134	0.0501448	0.025538		0.0213765		0.261805			0.617551	0.065254	0.00869462	0.800145	0.161262	0
	TA	LH27-2	#71	51.9581	0.371656	1.07635	10.4164	0.41101	14.3104	19.6399	0.32782	bdl	98.524		1.96823	0.0105899	0.0317698	0.0162845	0.0480543	-	0.0183825	0.0183825	0.311604	0.0131875	0.808132	0.797143	0.0240771	-		0.409102	0.414787	0.176112		1.91688	0.0481543	0.0245056		0.0183825		0.261182			0.610583	0.0720361	0.00936996	0.78408	0.177921	0
	TA	LH27-2	#72	52.0532	0.39113	1.07498	9.71727	0.403675	14.7232	20.0497	0.34176	bdl	98.78		1.96057	0.0110812	0.039433	0.00828591	0.0477189	-	0.0334431	0.0334431	0.272637	0.0128781	0.826695	0.809124	0.0249576	-		0.413906	0.42294	0.163154		1.90846	0.0499151	0.0254881		0.0249576		0.257179			0.646142	0.0705192	0.00870141	0.794218	0.17088	0
	TA	LH27-2	#76	52.458	0.544201	1.9057	11.1227	0.356104	19.9437	12.0344	0.194458	bdl	98.59		1.94751	0.015197	0.0524895	0.0308938	0.0833833	-	0.00429914	0.00429914	0.341032	0.0111978	1.10378	0.478704	0.0139972	-		0.246867	0.56928	0.183852		1.92352	0.0279944	0.014345		0.00429914		0.263989			0.285655	0.320575	0.0342685	0.44372	0.502955	0.0176196
	TA	LH27-2	#84	51.3054	0.535278	1.53844	7.89519	0.264089	15.8132	19.5308	0.293174	bdl	97.179		1.94673	0.0152775	0.0532714	0.0155271	0.0687985	-	0.0286577	0.0286577	0.221873	0.00848748	0.894481	0.794029	0.0215682	-		0.407693	0.459321	0.132986		1.91038	0.0431364	0.0220814		0.0215682		0.261883			0.598162	0.0768493	0.0099907	0.771574	0.188089	0
	TA	LH27-2	#85	51.162	0.52854	1.5459	8.27684	0.313954	15.7079	19.5699	0.31097	bdl	97.416		1.93874	0.0150653	0.0612591	0.0077821	0.0690412	-	0.0461938	0.0461938	0.216103	0.0100768	0.887359	0.794572	0.0228475	-		0.406558	0.454084	0.139358		1.89803	0.0456949	0.0235089		0.0228475		0.258757			0.618008	0.0795615	0.00985055	0.770759	0.19167	0
	TA	LH27-2	#91	51.4696	0.696304	2.3739	7.98833	0.16721	15.7598	19.9197	0.268757	0.0743567	98.718		1.92355	0.0195741	0.0764487	0.0281128	0.104561	-	0.0264649	0.0264649	0.223204	0.00529299	0.878037	0.797643	0.0194742	0.00219709		0.413131	0.45482	0.132049		1.89888	0.0389484	0.0200989		0.0194742		0.261636			0.600503	0.0841919	0.0107532	0.755667	0.187265	0.0130784
	TA	LH27-2	#92	51.1911	0.547337	1.67049	8.24284	0.26173	15.1893	20.3134	0.300819	0.123506	97.855		1.93549	0.0155661	0.0645097	0.00992841	0.0744381	-	0.0418091	0.0418091	0.218824	0.00838177	0.856138	0.82291	0.022052	0.00369197		0.422407	0.439512	0.138081		1.89787	0.0441041	0.0227109		0.022052		0.259485			0.633866	0.068619	0.00878458	0.795168	0.162786	0
	TA	LH27-2	#93	51.3489	0.52553	2.71498	8.07715	0.331107	15.4119	20.0697	0.242455	0.0641865	98.786		1.91996	0.0147804	0.0800439	0.0395975	0.119641	-	0.0265648	0.0265648	0.226001	0.0104861	0.859062	0.804035	0.0175767	0.00189749		0.417414	0.44603	0.136556		1.8891	0.0351534	0.0182686		0.0175767		0.26047			0.614107	0.0860835	0.0107818	0.753722	0.180186	0.0265072
	TA	LH27-2	#97	51.5732	0.675332	1.91262	8.08631	0.20616	15.474	19.4457	0.312489	bdl	97.737		1.94915	0.0191986	0.0508462	0.0343474	0.0851936	-	0.00039997	0.00039997	0.255181	0.00659951	0.871835	0.787441	0.0228983	-		0.409797	0.453767	0.136436		1.91446	0.0457966	0.0233626		0.00039997		0.263506			0.588709	0.0824868	0.0108418	0.756113	0.185741	0.0117678
	TA	LH27-2	#98	50.6952	0.718663	2.04499	8.7027	0.249061	15.5978	19.3909	0.28833	bdl	97.732		1.91713	0.0204428	0.082868	0.00827682	0.0911448	-	0.0544475	0.0544475	0.220782	0.00797766	0.879338	0.7857	0.0211408	-		0.403269	0.451379	0.145352		1.88582	0.0422816	0.0219291		0.0211408		0.260538			0.59536	0.0867362	0.0108609	0.752235	0.20387	0
	TA	LH27-2	#99	51.2157	0.618538	1.92897	7.4284	0.171657	15.5551	20.2856	0.338134	bdl	97.58		1.93397	0.0175688	0.0660328	0.0198148	0.0858476	-	0.0351376	0.0351376	0.199446	0.00549025	0.875646	0.820743	0.0247561	-		0.423818	0.452218	0.123964		1.89583	0.0495121	0.0254516		0.0247561		0.263909			0.602955	0.0670634	0.00915528	0.792214	0.160671	0.00103471
	TA	LH27-2	#100	51.3914	0.611619	1.96073	7.67634	0.21539	15.604	19.6995	0.330012	0.0735714	97.575		1.9421	0.0173857	0.0579022	0.0294257	0.087328	-	0.0156871	0.0156871	0.226913	0.00689431	0.879075	0.797642	0.0241801	0.00219819		0.414081	0.456405	0.129514		1.90363	0.0483601	0.0247748		0.0156871		0.264009			0.590351	0.0777216	0.0103814	0.766008	0.178595	0.00797108
	TA	LH27-2	#101	50.3654	0.661219	2.20605	7.7126	0.236125	15.5024	20.2822	0.328459	0.0665684	97.361		1.90699	0.0188317	0.0930128	0.00543032	0.0984431	-	0.0720389	0.0720389	0.172176	0.00757255	0.875028	0.822817	0.0241126	0.00199278		0.422019	0.448847	0.129134		1.87002	0.0482252	0.0251402		0.0241126		0.259934			0.625444	0.0720639	0.00921236	0.786036	0.169983	0
	TA	LH27-2	#102	51.3561	0.550663	1.57368	7.91201	0.211806	16.2497	19.0952	0.272144	0.0400426	97.282		1.94364	0.0156761	0.056364	0.0138289	0.070193	-	0.0299543	0.0299543	0.220464	0.00678965	0.916802	0.774319	0.0199695	0.00119817		0.39741	0.470588	0.132002		1.91158	0.0399391	0.0204656		0.0199695		0.261432			0.584135	0.087013	0.0110253	0.750052	0.210093	0
	TA	LH27-2	#151	50.9665	0.654827	1.93625	9.09159	0.29695	15.1161	18.7478	0.294583	bdl	97.154		1.94447	0.018792	0.0555264	0.0315366	0.087063	-	0.00769673	0.00769673	0.28238	0.00959592	0.859735	0.766374	0.0217907	-		0.397939	0.446465	0.155597		1.90849	0.0435815	0.0223258		0.00769673		0.263278			0.573214	0.0931778	0.011978	0.734057	0.208323	0.0113041
	TA	LH27-2	#152	51.7145	0.563739	1.74309	8.84662	0.329611	14.8071	19.1269	0.40481	bdl	97.621		1.96389	0.0161032	0.0361072	0.0419084	0.0780156	-	-	-	0.280956	0.0106021	0.838268	0.778256	0.029806	-		0.407857	0.439355	0.152788		1.89748	0.0596119	0.0304594		0.029806		0.266658			0.570342	0.0810664	0.0111424	0.753893	0.182474	0.0114151
	TA	LH27-2	#133	52.3557	0.413736	1.61849	6.30058	0.278735	17.4691	19.2978	0.233849	0.190024	98.158		1.94989	0.0115904	0.0501087	0.0209327	0.0710414	-	0.0172857	0.0172857	0.178952	0.00879275	0.9699	0.770065	0.0168861	0.00559538		0.395902	0.498694	0.105404		1.91892	0.0337721	0.0172952		0.0168861		0.260189			0.590071	0.0924463	0.0114053	0.741257	0.213282	0.00693784
	TA	LH27-2	#134	52.6054	0.429099	1.65002	6.66085	0.123847	17.2342	19.4928	0.216413	0.0850493	98.504		1.95521	0.0119964	0.0447866	0.0274918	0.0722783	-	0.00639808	0.00639808	0.20064	0.00389883	0.954914	0.776267	0.0155953	0.00249925		0.399682	0.491717	0.108601		1.93182	0.0311906	0.0158892		0.00639808		0.259165			0.601944	0.0904724	0.0110408	0.747093	0.207754	0.0130202
	AB	LH5-2	#6	49.6299	1.69049	1.71536	16.1818	0.427631	9.43434	18.9692	0.8135	0.0454872	98.958		1.92954	0.049437	0.0704602	0.00813962	0.0785998	-	0.0233702	0.0233702	0.502759	0.014082	0.546803	0.790193	0.0613218	0.00139822		0.420933	0.291312	0.287755		1.83975	0.122644	0.0624968		0.0233702		0.275758			0.713602	0.122525	0.0152936	0.758053	0.158598	0
	AB	LH5-2	#11	48.1647	2.36006	2.83157	13.6058	0.357907	10.6656	19.5152	0.585665	bdl	98.119		1.87176	0.0689879	0.128242	0.00144765	0.129689	-	0.0319481	0.0319481	0.410233	0.0117809	0.617896	0.81258	0.0441283	-		0.431195	0.327922	0.240883		1.84071	0.0882566	0.0457533		0.0319481		0.268447			0.773401	0.134312	0.0150778	0.752626	0.155141	0
	AB	LH5-2	#32	49.2063	1.74954	1.903	14.7932	0.272049	9.48027	20.2204	0.69195	bdl	98.336		1.91969	0.051341	0.0803076	0.00719173	0.0874994	-	0.0226739	0.0226739	0.459971	0.00898966	0.551366	0.845228	0.0523398	-		0.447622	0.292028	0.26035		1.85656	0.10468	0.0533741		0.0226739		0.273558			0.75882	0.0943794	0.0119467	0.808562	0.113738	0
	AB	LH5-2	#134	48.6048	2.28305	2.75816	13.9407	0.256876	10.4927	20.1349	0.589145	bdl	99.08		1.87261	0.0661627	0.12524	-	0.12524	0.00214555	0.0384702	0.0406157	0.408552	0.00838261	0.60265	0.831175	0.0440087	-		0.439446	0.318658	0.241897		1.84238	0.0880174	0.0455955		0.0406157		0.263598			0.828152	0.12535	0.0133423	0.773185	0.141102	0
	AB	LH5-2	#34	47.1741	2.85904	2.74032	14.1573	0.335113	10.1856	20.0976	0.656806	bdl	98.239		1.8374	0.0837629	0.125794	-	0.125794	0.0368019	0.0437738	0.0805757	0.380568	0.0110555	0.59142	0.838724	0.0496004	-		0.440881	0.310917	0.248202		1.81071	0.0992007	0.0519399		0.0496004		Undef
	AB	LH5-2	#57	47.8073	1.91005	1.67484	16.6041	0.385919	9.03073	20.2296	0.665216	bdl	98.354		1.87638	0.0563899	0.0774739	-	0.0774739	0.0461462	0.0612631	0.107409	0.437593	0.0128294	0.528394	0.850721	0.0506216	-		0.4392	0.272823	0.287977		1.81671	0.101243	0.0527871		0.0506216		Undef
	AB	LH5-2	#65	48.2309	2.13859	2.02668	14.8729	0.257468	10.3759	19.9631	0.686769	bdl	98.575		1.87139	0.062416	0.0926783	-	0.0926783	0.0359365	0.0547509	0.0906874	0.391917	0.0084615	0.600169	0.829924	0.0516649	-		0.431982	0.312427	0.255591		1.82201	0.10333	0.0536684		0.0516649		Undef
	AB	LH5-2	#69	46.7899	3.08096	2.92235	14.1466	0.314423	10.315	20.1953	0.643203	bdl	98.43		1.81829	0.0900587	0.133844	-	0.133844	0.0478655	0.0495572	0.0974226	0.362325	0.0103493	0.597572	0.84088	0.0484625	-		0.440576	0.31313	0.246293		1.80078	0.0969251	0.051075		0.0484625		Undef
	AB	LH5-2	#86	50.2182	1.36093	1.58979	10.7461	0.316905	14.7222	19.3514	0.25924	0.0632402	98.628		1.90212	0.038774	0.0709693	-	0.0709693	0.0269125	0.0374782	0.0643907	0.276003	0.010167	0.831298	0.785348	0.0190381	0.00189385		0.399205	0.422608	0.178187		1.89265	0.0380763	0.0197212		0.0190381		Undef
	AB	LH5-2	#89	49.6081	1.45747	1.92921	10.0242	0.296551	14.1936	20.1805	0.272596	0.0992798	98.078		1.88943	0.0417549	0.0865991	-	0.0865991	0.0239667	0.0441964	0.0681631	0.251127	0.00956676	0.805899	0.823538	0.02013	0.00298961		0.420523	0.411561	0.167916		1.88057	0.0402601	0.0209598		0.02013		Undef
	AB	LH5-2	#90	48.5954	1.76676	2.32305	13.8699	0.316845	10.9519	20.2882	0.511073	bdl	98.662		1.8757	0.0512948	0.105677	-	0.105677	0.0186255	0.059761	0.0783865	0.369323	0.0103586	0.630179	0.839044	0.038247	-		0.435338	0.327005	0.237657		1.83855	0.076494	0.0399438		0.038247		Undef
	AB	LH5-2	#92	48.4897	1.67024	1.46008	17.1473	0.407526	8.65564	19.9193	0.798519	bdl	98.592		1.90152	0.0492672	0.0674812	-	0.0674812	0.0310035	0.0606634	0.0916669	0.470676	0.013536	0.506009	0.836945	0.0607131	-		0.436168	0.263732	0.3001		1.81363	0.121426	0.0627507		0.0607131		Undef
	AB	LH5-2	#95	47.8023	1.61532	1.83943	15.5327	0.3869	9.53701	19.8545	0.656578	bdl	97.268		1.88738	0.0479733	0.0855956	-	0.0855956	0.0270223	0.0661375	0.0931598	0.419717	0.0129389	0.561348	0.839931	0.0502625	-		0.435846	0.291319	0.272835		1.821	0.100525	0.0523153		0.0502625		Undef
	AB	LH5-2	#2	48.2605	2.20561	2.97862	11.7319	0.279378	12.3708	20.0152	0.454663	0.108537	98.452		1.8492	0.0635696	0.134512	-	0.134512	0.0162909	0.0541537	0.0704446	0.305493	0.00906713	0.706638	0.821721	0.0337776	0.00328808		0.429451	0.369346	0.201202		1.83385	0.0675551	0.035529		0.0337776		Undef
	AB	LH5-2	#34	48.821	1.87835	0.802755	16.7626	0.40295	8.89007	18.7704	0.824499	bdl	97.174		1.94263	0.0562199	0.0376464	-	0.0376464	0.0197219	0.00823826	0.0279602	0.529845	0.0135806	0.527349	0.80026	0.0636094	-		0.421406	0.277725	0.300869		1.85745	0.127219	0.0641006		0.0279602		Undef
	AB	LH5-2	#40	48.3997	2.09492	1.29417	16.5325	0.307088	8.56974	20.0665	0.695514	bdl	97.98		1.91235	0.0622615	0.0602659	-	0.0602659	0.0273891	0.0164135	0.0438025	0.502482	0.0102771	0.504777	0.84951	0.0532814	-		0.444566	0.264189	0.291245		1.85677	0.106563	0.0542766		0.0438025		Undef
	AB	LH5-2	#44	48.0861	2.1058	2.05587	14.7177	0.366213	9.95499	19.7666	0.629439	bdl	97.723		1.88574	0.0621168	0.0950197	-	0.0950197	0.0192432	0.0376888	0.0569321	0.425744	0.0121641	0.581983	0.83055	0.0478588	-		0.435433	0.30515	0.259417		1.83828	0.0957176	0.0494922		0.0478588		Undef
	AB	LH5-2	#45	48.6951	1.84163	1.74904	14.7317	0.342101	9.83448	19.7467	0.637124	bdl	97.615		1.91255	0.0544075	0.0809624	-	0.0809624	0.00648897	0.0265549	0.0330438	0.450834	0.0113807	0.575821	0.830987	0.0485175	-		0.436878	0.302761	0.260361		1.85764	0.097035	0.0496425		0.0330438		Undef
	AB	LH5-2	#54	48.7126	1.58649	0.929925	17.5623	0.442125	7.57121	19.5981	0.798333	bdl	97.296		1.94842	0.047732	0.0438375	-	0.0438375	0.00773897	0.0171256	0.0248646	0.562598	0.0149787	0.451457	0.839903	0.0619118	-		0.443497	0.23841	0.318093		1.85396	0.123824	0.0626073		0.0248646		Undef
	AB	LH5-2	#78	48.2762	1.58673	1.60325	17.8652	0.367853	7.83253	19.7037	0.69593	bdl	97.948		1.91641	0.0473792	0.0750087	-	0.0750087	0.00857813	0.0419929	0.050571	0.542517	0.0123685	0.463518	0.838063	0.0535634	-		0.439453	0.243081	0.317466		1.8441	0.107127	0.0549024		0.050571		Undef
	AB	LH5-2	#81	48.4901	1.25184	1.00976	19.6375	0.434126	6.79973	19.0143	0.850866	bdl	97.548		1.94664	0.0378017	0.0477758	-	0.0477758	0.00558548	0.0433872	0.0489727	0.610313	0.0147616	0.406942	0.817874	0.0662278	-		0.430715	0.21433	0.354955		1.83513	0.132456	0.0673189		0.0489727		0.257898			0.890884	0.114187	0.0113988	0.798548	0.136119	0
	AB	LH5-2	#82	48.4094	1.98013	2.03368	15.5489	0.417114	9.27165	19.7486	0.601717	bdl	98.041		1.90165	0.0585093	0.0941541	-	0.0941541	0.0041935	0.0263591	0.0305526	0.480256	0.0138785	0.542958	0.831212	0.045829	-		0.437736	0.285966	0.276299		1.85443	0.0916579	0.0470987		0.0305526		0.245196			1.05513	0.140048	0.0111982	0.786216	0.135129	0
	AB	LH5-2	#96	47.9045	2.14345	1.296	18.5718	0.400741	7.204	19.3011	0.866321	bdl	97.748		1.91461	0.0644389	0.0610474	-	0.0610474	0.0243392	0.0230424	0.0473815	0.573367	0.0135661	0.429227	0.826534	0.0671322	-		0.437299	0.227118	0.335583		1.82913	0.134264	0.0683839		0.0473815		Undef
	AB	LH5-2	#117	47.9119	1.62208	1.12152	17.3386	0.348415	7.89007	19.4421	0.837781	bdl	96.553		1.92598	0.0490467	0.053134	-	0.053134	0.0208847	0.0404237	0.0613084	0.52157	0.0118629	0.472822	0.837383	0.065296	-		0.439578	0.248232	0.31219		1.83178	0.130592	0.0665481		0.0613084		Undef
	AB	LH5-2	#139	48.9122	2.04493	2.54842	12.3803	0.264261	12.1338	19.7754	0.56514	bdl	98.654		1.87354	0.0589188	0.115046	-	0.115046	0.0114149	0.0496972	0.0611121	0.335468	0.00857364	0.692869	0.811604	0.0419709	-		0.424994	0.362859	0.212147		1.83994	0.0839419	0.0436315		0.0419709		Undef
	AB	LH5-2	#143	48.7849	1.96322	1.32378	16.4637	0.307494	8.58446	19.7886	0.709475	bdl	97.953		1.92718	0.0583358	0.0616322	-	0.0616322	0.0111877	0.0101888	0.0213765	0.522525	0.0102887	0.505544	0.837579	0.0543402	-		0.441449	0.266478	0.292073		1.86565	0.10868	0.0550468		0.0213765		Undef
	AB	LH27-1	#136	46.4287	3.08553	4.88208	10.0529	0.228603	12.1039	21.317	0.503381	0.268068	98.905		1.765	0.0882302	0.218735	-	0.218735	0.0162634	0.0875836	0.103847	0.215751	0.0073608	0.685947	0.868276	0.0371024	0.0080571		0.461544	0.364665	0.173791		1.76997	0.0742049	0.0402373		0.0371024		0.247972			1.02023	0.152115	0.0137579	0.762247	0.12611	0
	AB	LH27-1	#8	47.6374	2.9094	3.80433	11.5857	0.249145	11.8436	19.8607	0.522704	0.322927	98.74		1.82485	0.0838323	0.171756	-	0.171756	0.00339321	0.0365269	0.0399202	0.331238	0.00808383	0.676347	0.81517	0.0388224	0.00978044		0.43573	0.361565	0.202705		1.82275	0.0776447	0.0408571		0.0388224		0.258717			0.857534	0.163483	0.0171255	0.728484	0.161268	0
	AB	LH27-1	#57	46.4525	3.20104	4.46821	10.365	0.192572	11.4571	21.2134	0.511434	0.199753	98.063		1.78803	0.0926803	0.202701	-	0.202701	0.00926803	0.0586975	0.0679655	0.265683	0.00627834	0.657432	0.874882	0.0381683	0.00607903		0.467278	0.351175	0.181547		1.798	0.0763366	0.0407274		0.0381683		0.25275			0.968966	0.133366	0.0132346	0.775931	0.110402	0
	AB	LH27-1	#66	47.8958	0.615768	0.141804	32.677	1.10496	4.87828	9.45018	0.653872	bdl	97.438		2.0066	0.0194049	-	0.00700175	0.00700175	-	-	-	1.14489	0.0392098	0.304676	0.424206	0.0531133	-		0.221755	0.159287	0.618958		1.87377	0.106227	0.0536499		0.0531133		0.281457			0.321271	0.4437	0.0531199	0.423858	0.512514	0
	AB	LH27-1	#10	47.473	2.49982	3.71684	10.653	0.165352	11.9487	20.9699	0.425384	0.206665	98.081		1.82447	0.0722651	0.168353	-	0.168353	0.00717668	0.0564166	0.0635933	0.278794	0.00538251	0.684575	0.863494	0.031697	0.00627959		0.455454	0.361122	0.183424		1.82686	0.063394	0.0335372		0.031697		0.258963			0.884979	0.120859	0.0133212	0.782197	0.125166	0
	AB	LH27-1	#161	48.0372	1.55883	1.47452	21.2024	0.445903	5.90649	18.127	0.720617	bdl	97.528		1.9459	0.0474976	0.0540973	0.0162992	0.0703965	-	-0.00099995	-0.00099995	0.719264	0.0152992	0.356682	0.786761	0.0565972	-		0.419157	0.190048	0.390796		1.86271	0.113194	0.0572874		-0.00099995		0.277474			0.699956	0.116415	0.0164108	0.759688	0.157683	0
	AB	LH27-1	#166	48.1874	1.84367	2.04742	18.4431	0.467374	7.71609	19.2076	0.526694	bdl	98.469		1.90938	0.0549505	0.0906184	0.0049955	0.0956139	-	0.0161854	0.0161854	0.594965	0.0156859	0.45579	0.815466	0.0404636	-		0.42962	0.240154	0.330226		1.86622	0.0809272	0.0415619		0.0161854		0.268367			0.777226	0.116987	0.0147129	0.772769	0.147873	0
	AB	LH27-1	#167	47.713	1.39637	1.27105	22.9013	0.522744	4.64486	18.9241	0.729497	bdl	98.221		1.93525	0.042602	0.0607603	-	0.0607603	0.00399082	0.0367156	0.0407064	0.736107	0.0179587	0.280854	0.822408	0.0573681	-		0.433297	0.147988	0.418715		1.83937	0.114736	0.0587154		0.0407064		0.259211			0.876803	0.110682	0.012412	0.796895	0.132443	0
	AB	LH27-1	#179	49.0813	2.23535	2.69873	13.159	0.365683	11.2876	19.7011	0.487308	0.0526731	99.079		1.88424	0.06455	0.11576	0.00634508	0.122105	-	0.0149884	0.0149884	0.407484	0.0118908	0.645999	0.810372	0.0362719	0.00159876		0.428591	0.341694	0.229715		1.86386	0.0725438	0.0374632		0.0149884		0.270066			0.755411	0.127725	0.0161933	0.753956	0.157948	0
	AB	LH27-1	#180	49.4996	1.87007	2.98603	11.6022	0.299427	11.6509	20.3882	0.477377	0.0959021	98.882		1.89268	0.0537852	0.10732	0.0272425	0.134563	-	0.00499863	0.00499863	0.365999	0.00969733	0.664117	0.83527	0.0353903	0.0028992		0.44426	0.353267	0.202473		1.86539	0.0707805	0.036557		0.00499863		0.283845			0.676646	0.0991274	0.0154315	0.780991	0.127304	0
	AB	LH27-1	#182	49.6235	1.8207	2.35059	12.8732	0.351098	11.4615	20.0663	0.509919	0.0890836	99.146		1.89997	0.0524358	0.100027	0.0060426	0.10607	-	0.0242703	0.0242703	0.387925	0.0113861	0.654199	0.823192	0.0378536	0.0026967		0.433026	0.344168	0.222807		1.86531	0.0757073	0.0390038		0.0242703		0.271214			0.754534	0.112522	0.0147662	0.77542	0.146567	0
	AB	LH27-1	#106	46.7748	1.6151	1.19846	23.7302	0.420501	4.29229	19.1138	0.764991	bdl	97.945		1.90905	0.0495831	0.0576478	-	0.0576478	0.0333043	0.052122	0.0854263	0.72453	0.0145364	0.261157	0.835843	0.0605352	-		0.434999	0.13593	0.429071		1.82153	0.12107	0.0623238		0.0605352		Undef
	AB	LH27-1	#2	47.7705	2.47281	2.17193	15.6695	0.396544	9.88094	19.1458	0.602378	bdl	98.132		1.87216	0.0728959	0.100319	-	0.100319	0.0275229	0.0275229	0.0550459	0.458516	0.0131631	0.577284	0.803949	0.0457718	-		0.421358	0.302593	0.276048		1.83975	0.0915437	0.0474002		0.0457718		Undef
	AB	LH27-1	#33	46.7444	2.60827	1.98438	18.2993	0.367762	8.01426	19.7879	0.568785	bdl	98.404		1.85237	0.0777463	0.0926783	-	0.0926783	0.05495	0.0352397	0.0901896	0.516251	0.0123438	0.473446	0.840177	0.0437012	-		0.434778	0.245027	0.320195		1.82987	0.0874023	0.0455867		0.0437012		Undef
	AB	LH27-1	#55	47.0546	1.85648	1.45213	21.3455	0.547605	6.4639	19.0079	0.601261	bdl	98.345		1.88851	0.056045	0.0686875	-	0.0686875	0.0428052	0.0461898	0.0889951	0.627445	0.0186153	0.38674	0.817381	0.0467871	-		0.421508	0.199457	0.379035		1.83157	0.0935742	0.0486064		0.0467871		Undef
	AB	LH27-1	#59	48.1601	2.20271	2.33429	12.5045	0.28032	11.8413	20.3678	0.439258	0.0424347	98.193		1.85857	0.063941	0.10617	-	0.10617	0.0352572	0.0451173	0.0803745	0.323191	0.00916289	0.681241	0.842189	0.0328669	0.00129476		0.434967	0.35188	0.213152		1.84662	0.0657338	0.0343732		0.0328669		Undef
	AB	LH27-1	#65	48.1788	1.81449	1.97322	17.9797	0.498117	9.51679	18.1087	0.550569	bdl	98.63		1.88951	0.0535274	0.0912059	-	0.0912059	0.0192878	0.0450049	0.0642927	0.525406	0.0165466	0.556406	0.760946	0.041865	-		0.395579	0.28928	0.315142		1.84276	0.08373	0.0434625		0.041865		Undef
	AB	LH27-1	#17	46.2168	2.76646	2.66114	18.3697	0.380007	7.47478	19.2118	0.644732	bdl	97.763		1.84607	0.0831195	0.125277	-	0.125277	0.0286533	0.0374237	0.066077	0.547552	0.0128566	0.445098	0.822225	0.0499315	-		0.434161	0.235051	0.330788		1.81487	0.099863	0.0521549		0.0499315		Undef
	AB	LH27-1	#18	45.6563	3.23324	2.79823	17.2146	0.361508	8.42467	19.604	0.639476	bdl	97.972		1.80937	0.0963819	0.130698	-	0.130698	0.0599279	0.0463011	0.106229	0.464304	0.0121348	0.497725	0.832426	0.0491359	-		0.435177	0.26023	0.304593		1.79445	0.0982718	0.0519208		0.0491359		Undef
	AB	LH27-1	#40	47.7313	2.36766	2.45826	14.5695	0.293884	10.8465	19.6419	0.517511	bdl	98.448		1.85222	0.0691097	0.112428	-	0.112428	0.0353515	0.0478988	0.0832503	0.389564	0.00965943	0.627465	0.81667	0.0389365	-		0.42388	0.325712	0.250408		1.8337	0.0778729	0.0407377		0.0389365		Undef
	AB	LH27-1	#47	47.4879	2.33419	2.67803	14.5208	0.395129	11.3113	19.3733	0.533777	bdl	98.673		1.83396	0.0678067	0.121893	-	0.121893	0.044144	0.0698946	0.114039	0.354941	0.012925	0.651223	0.80165	0.0399682	-		0.414327	0.336616	0.249057		1.80781	0.0799364	0.0423448		0.0399682		Undef
	AB	LH27-1	#54	47.1559	2.00459	2.06324	17.0519	0.427962	8.86501	19.7748	0.51024	bdl	97.911		1.8643	0.0596124	0.0961361	-	0.0961361	0.0395591	0.0550842	0.0946433	0.469136	0.0143309	0.522479	0.837658	0.0391113	-		0.432167	0.269588	0.298245		1.82927	0.0782226	0.041008		0.0391113		Undef
	AB	LH27-1	#150	48.124	2.37097	2.68211	13.364	0.323464	11.4985	19.641	0.52657	bdl	98.547		1.85559	0.0687662	0.121886	-	0.121886	0.0225234	0.0457445	0.0682679	0.362667	0.0105641	0.660953	0.811441	0.0393662	-		0.423963	0.345373	0.230664		1.83506	0.0787323	0.0411394		0.0393662		Undef
	AB	LH27-1	#159	47.6592	1.64429	0.983058	23.1457	0.525221	4.93203	18.0292	0.629086	bdl	97.589		1.94956	0.0505937	0.0473941	-	0.0473941	0.00129984	-	0.00129984	0.790501	0.0181977	0.300762	0.790201	0.0498938	-		0.415686	0.158234	0.42608		1.88146	0.0997875	0.0503659		0.00129984		Undef
	AB	LH27-1	#11	47.5816	2.34374	2.61934	14.7411	0.245404	10.7413	19.7757	0.464561	bdl	98.533		1.84626	0.0684059	0.119785	-	0.119785	0.033954	0.0513791	0.0853331	0.39301	0.00806532	0.621328	0.822165	0.0349497	-		0.426004	0.321976	0.25202		1.8365	0.0698994	0.0366656		0.0349497		Undef
	AB	LH27-1	#27	47.6204	2.57964	2.63204	14.828	0.35501	10.5301	19.5538	0.625657	bdl	98.748		1.84478	0.0751693	0.120171	-	0.120171	0.0350458	0.0517722	0.086818	0.393568	0.0116487	0.608124	0.811629	0.0469932	-		0.42453	0.31812	0.257351		1.81332	0.0939865	0.049277		0.0469932		Undef
	AB	LH27-1	#54	47.6881	1.66617	2.00004	18.3044	0.388599	8.70931	19.4384	0.511898	bdl	98.751		1.87394	0.0492488	0.0926276	-	0.0926276	0.0334295	0.0663616	0.0997911	0.501741	0.012934	0.510198	0.818426	0.0390011	-		0.421193	0.262596	0.316212		1.83037	0.0780022	0.0408738		0.0390011		Undef
	AB	LH27-1	#56	47.8385	2.34591	2.36987	15.6687	0.278583	10.235	19.4923	0.576755	bdl	98.825		1.85758	0.0685191	0.108455	-	0.108455	0.0339608	0.0482024	0.0821631	0.426651	0.00916243	0.592471	0.810975	0.043422	-		0.422062	0.308378	0.269561		1.8301	0.0868439	0.0453034		0.043422		Undef
	AB	LH27-1	#79	41.2305	0.804204	1.08236	27.293	0.55282	21.0919	6.68987	0.191897	bdl	98.959		1.56465	0.0229559	0.0484092	-	0.0484092	0.386937	0.402881	0.789819	0.0763597	0.0177692	1.19323	0.272013	0.0141193	-		0.115786	0.507969	0.376245		1.5416	0.0282387	0.0179883		0.0141193		Undef
	AB	LH27-1	#9	47.5494	2.1279	2.91703	11.8497	0.252164	12.2592	20.0373	0.469837	0.0943873	97.557		1.8387	0.0618936	0.132942	-	0.132942	0.0283596	0.0698542	0.0982138	0.284989	0.00825912	0.706702	0.830191	0.0352256	0.00288572		0.430505	0.366508	0.202987		1.82188	0.0704513	0.0372298		0.0352256		Undef
	AB	LH27-1	#25	45.2928	3.65993	2.70289	17.8797	0.309969	8.31596	19.0125	0.631922	0.0537636	97.877		1.80261	0.109566	0.126782	-	0.126782	0.0706058	0.0253265	0.0959323	0.499167	0.0104491	0.493395	0.810748	0.0487623	0.00169175		0.424539	0.258389	0.317072		1.80331	0.0975246	0.0513062		0.0487623		Undef
	AB	LH27-1	#31	47.0024	2.64412	2.97102	16.2639	0.333731	9.47052	19.3065	0.521438	bdl	98.533		1.83949	0.0778373	0.137037	-	0.137037	0.0234708	0.0438022	0.067273	0.465031	0.0110627	0.552535	0.809568	0.0395665	-		0.424858	0.29	0.285142		1.82713	0.0791329	0.041512		0.0395665		Undef
	AB	LH27-1	#76	45.9945	3.33082	2.24911	19.2965	0.570889	7.09898	19.6514	0.63706	bdl	98.852		1.82748	0.0995471	0.105321	-	0.105321	0.0671943	0.0223981	0.0895924	0.55159	0.0192126	0.420487	0.836593	0.0490767	-		0.436296	0.219314	0.344389		1.80867	0.0981534	0.0514748		0.0490767		Undef
	AB	LH27-1	#146	50.0891	1.41326	1.7505	12.2375	0.405959	13.6138	19.1204	0.341154	0.0763571	99.048		1.90278	0.0403829	0.0783727	-	0.0783727	0.0188453	0.0392861	0.0581314	0.330641	0.0130621	0.770964	0.778243	0.0251271	0.00229335		0.398873	0.395185	0.205942		1.87985	0.0502543	0.0260371		0.0251271		Undef
	AB	LH27-1	#163	47.5717	3.19111	1.99587	17.9865	0.435986	7.65198	19.4565	0.605309	bdl	98.918		1.88047	0.0948834	0.0929837	-	0.0929837	0.00259955	-	0.00259955	0.591996	0.0145974	0.450921	0.824056	0.0463919	9.99825e-05		0.437353	0.239345	0.323302		1.86697	0.0927838	0.0473445		0.00259955		Undef
[truncated: 4 more columns]

## Sheet: S2d - CPX4
	Table S2d. Clinopyroxene: complete dataset for the EMPA, chemical formulae and thermobarometry results of CPX4 group from LHPCS lavas
	Rock Type	Sample	Spot																																					KD cpx-liq(Mg-Fe)	KD cpx-liq(Mg-Fe)		Predicted			Observed (Putirka et al. 1996)
		(thin section)		SiO2	TiO2	Al2O3	FeOtot	MnO	MgO	CaO	Na2O	Cr2O3	Total		Si	Ti	Al[IV]	Al[VI]	AlTot	Fe3+ [IV]	Fe3+ [VI]	Fe3+ Tot	Fe2+	Mn	Mg	Ca	Na	Cr		XWo	XEn	XFs		Q	J	J/(J+Q)		XAeg		[eq. 35]	[eq. 35a]		XEnFs	XDiHd	XCaTs	XEnFs	XDiHd	XCaTs
				(wt%)											(apfu)																												[eq. 3.1a]	[eq. 3.2]	[eq. 3.4]
	TR	LH5-1	#21	52.1769	0.228098	0.571113	11.8394	0.473691	13.5064	20.2604	0.324017	bdl	99.38		1.97275	0.00648703	0.0254491	-	0.0254491	0.00179641	0.038024	0.0398204	0.334531	0.0151697	0.761277	0.820758	0.0237525	-		0.416286	0.38616	0.197554		1.91657	0.047505	0.024187		0.0237525		0.236569	0.160504		0.715332	0.0580214	0.00397201	0.813152	0.163129	0
	TR	LH5-1	#78	52.2059	0.264004	0.779565	11.5309	0.525173	13.5766	20.2613	0.365988	bdl	99.578		1.96727	0.00748316	0.0327264	0.00189573	0.0346221	-	0.0421053	0.0421053	0.321277	0.0167623	0.762684	0.818059	0.0267398	-		0.417175	0.388978	0.193848		1.90202	0.0534797	0.0273483		0.0267398		0.24368	0.15935		0.645456	0.0552613	0.00428462	0.808167	0.16105	0
	TR	LH5-1	#90	52.0213	0.392911	1.02791	10.7421	0.512393	14.233	20.4814	0.385887	bdl	99.797		1.94733	0.0110632	0.0453492	-	0.0453492	0.00732564	0.0585553	0.0658809	0.270401	0.016246	0.794259	0.821469	0.0280069	-		0.417344	0.403564	0.179092		1.88613	0.0560138	0.0288412		0.0280069		0.233744	0.16475		0.744991	0.0632341	0.00406922	0.805041	0.16587	0
	TR	LH5-1	#91	51.9112	0.379734	1.27012	10.4552	0.424657	14.2761	19.7791	0.33147	bdl	98.838		1.96025	0.010786	0.0397483	0.0167782	0.0565265	-	0.0256666	0.0256666	0.304504	0.0135823	0.803655	0.80026	0.0242685	-		0.410866	0.412654	0.17648		1.90842	0.0485369	0.0248022		0.0242685		0.253076	0.161002		0.558354	0.0578574	0.00514441	0.784276	0.176014	0
	TR	LH5-1	#17	51.7645	0.342308	0.909915	10.9887	0.482625	14.3641	20.367	0.350484	bdl	99.573		1.94219	0.00966063	0.040236	-	0.040236	0.0175784	0.0638896	0.081468	0.263327	0.0153375	0.803426	0.818764	0.0254961	-		0.413018	0.405325	0.181657		1.88552	0.0509922	0.026332		0.0254961		Undef	Undef
	TR	LH5-1	#18	51.7289	0.276821	0.626187	11.6613	0.460551	13.6316	20.5431	0.311308	bdl	99.275		1.95575	0.00787245	0.0279023	-	0.0279023	0.0163428	0.0513204	0.0676632	0.301046	0.0147484	0.768311	0.832187	0.0228201	-		0.419445	0.387292	0.193264		1.90154	0.0456403	0.0234391		0.0228201		Undef	Undef
	TR	LH5-1	#19	51.7354	0.316615	0.907077	11.0019	0.453003	13.84	20.8443	0.307082	bdl	99.422		1.94843	0.00896928	0.0402621	-	0.0402621	0.0113113	0.056058	0.0673693	0.279144	0.0144505	0.777039	0.841119	0.0224232	-		0.424982	0.392648	0.182371		1.8973	0.0448464	0.0230911		0.0224232		0.19271	0.178585		1.67458	0.101547	0.00260701	0.825703	0.152134	0
	TR	LH5-1	#20	52.2108	0.193043	0.528662	11.8164	0.517421	13.3142	20.5033	0.355398	bdl	99.476		1.97331	0.00548806	0.0235488	-	0.0235488	0.00314316	0.0406616	0.0438047	0.329683	0.016564	0.750168	0.830294	0.0260434	-		0.421346	0.380726	0.197928		1.91015	0.0520867	0.0265446		0.0260434		0.234843	0.160103		0.743695	0.0555181	0.00371616	0.823054	0.152359	0
	TR	LH5-1	#79	51.8988	0.274271	0.796685	12.0878	0.480894	13.7005	19.9582	0.366961	bdl	99.626		1.9556	0.00777376	0.0353806	-	0.0353806	0.00901956	0.0553631	0.0643827	0.316532	0.0153482	0.769603	0.80578	0.0268095	-		0.408671	0.390365	0.200964		1.89191	0.053619	0.0275601		0.0268095		0.228302	0.164367		0.79715	0.0730351	0.00417277	0.793425	0.18177	0
	TR	LH5-1	#80	51.813	0.252948	0.704047	11.4925	0.533505	13.8425	20.2783	0.399345	bdl	99.4		1.95274	0.00717078	0.0312726	-	0.0312726	0.0159849	0.0616986	0.0776834	0.28454	0.0170306	0.777731	0.818863	0.0291811	-		0.414422	0.393648	0.191929		1.88113	0.0583622	0.0300914		0.0291811		Undef	Undef
	TR	LH5-1	#92	51.7198	0.378767	0.966955	11.1055	0.48412	14.8444	19.9504	0.337836	bdl	99.792		1.93331	0.0106499	0.0425998	-	0.0425998	0.0240868	0.0698716	0.0939584	0.25321	0.015328	0.827212	0.799044	0.0244849	-		0.401767	0.415975	0.182257		1.87947	0.0489698	0.0253935		0.0244849		Undef	Undef
	TA	LH4	#128	51.3163	1.0885	2.03174	11.5559	0.377155	15.7636	17.7386	0.299065	0.0746976	100.273		1.90602	0.030411	0.0889399	-	0.0889399	0.00503527	0.0524964	0.0575317	0.301418	0.0118653	0.872847	0.705935	0.021537	0.00219358		0.362078	0.447737	0.190184		1.8802	0.043074	0.0223962		0.021537		0.246902			0.697014	0.203871	0.0162517	0.666018	0.285924	0
	TA	LH4	#161	51.236	0.643135	1.90946	7.4593	0.205107	16.496	20.3575	0.228831	0.0946535	98.63		1.90993	0.0180333	0.0838896	-	0.0838896	0.00617714	0.0677493	0.0739265	0.158613	0.00647604	0.916708	0.813092	0.0165388	0.00278968		0.412967	0.465644	0.121389		1.88841	0.0330776	0.0172146		0.0165388		0.248004			0.804939	0.108627	0.00972288	0.777614	0.189379	0
	TA	LH4	#177	50.2975	1.21584	2.12834	14.6685	0.418167	16.2607	13.8494	0.319006	bdl	99.199		1.8965	0.0344836	0.0945808	-	0.0945808	0.0089199	0.0573564	0.0662763	0.396263	0.0133549	0.914015	0.559512	0.0233213	-		0.287003	0.468898	0.244099		1.86979	0.0466426	0.0243382		0.0233213		0.241852			0.512658	0.434978	0.0284148	0.516036	0.434151	0
	TA	LH4	#183	51.7407	1.01246	1.68825	11.2965	0.253275	15.8005	17.7594	0.337466	0.0644416	99.995		1.92531	0.0283384	0.074039	-	0.074039	0.000648589	0.040462	0.0411106	0.310425	0.00798264	0.876494	0.70806	0.024347	0.00189588		0.3642	0.450886	0.184914		1.89498	0.0486941	0.0250526		0.024347		0.250226			0.677472	0.185895	0.0158203	0.675788	0.278334	0
	TA	LH4	#185	50.3317	1.12548	2.57508	10.6674	0.33631	14.9918	18.8835	0.378969	0.175094	99.505		1.88288	0.0316702	0.113535	-	0.113535	0.0035853	0.076088	0.0796733	0.254058	0.0106563	0.836072	0.756897	0.0274873	0.00517877		0.39067	0.431584	0.177746		1.84703	0.0549746	0.0289036		0.0274873		0.254555			0.691687	0.149777	0.0140609	0.707353	0.235228	0
	TA	LH4	#192	51.0639	1.20194	1.97547	10.7247	0.239299	15.2725	18.703	0.297112	0.0573439	99.554		1.91035	0.0338231	0.0871018	-	0.0871018	0.00254421	0.0418548	0.044399	0.291138	0.00758275	0.851762	0.749694	0.021551	0.00169614		0.385516	0.43805	0.176434		1.89259	0.0431019	0.0222669		0.021551		0.24671			0.758982	0.16163	0.0133227	0.71048	0.240659	0
	TA	LH4	#194	50.6956	1.40829	1.94591	12.4546	0.284522	13.9788	18.4929	0.364691	bdl	99.696		1.91038	0.0399182	0.0864228	-	0.0864228	0.00319345	0.0359264	0.0391198	0.353376	0.00908138	0.78529	0.746669	0.0266454	-		0.386155	0.406172	0.207673		1.88534	0.0532908	0.0274889		0.0266454		0.243614			0.796509	0.170744	0.0132889	0.707547	0.237173	0
	TA	LH4	#195	51.3716	1.16244	1.85134	13.1125	0.397773	16.7529	14.8414	0.271688	bdl	99.789		1.91756	0.032638	0.0814453	-	0.0814453	0.000998104	0.036331	0.0373291	0.371993	0.0125761	0.932229	0.593572	0.0196626	-		0.304743	0.478663	0.216594		1.89779	0.0393253	0.0203009		0.0196626		0.250053			0.519449	0.324738	0.0252525	0.557009	0.394392	0
	TA	LH4	#203	51.2807	1.07063	2.3585	16.4419	0.34351	12.9998	13.0345	0.302809	bdl	98.313		1.98277	0.0311378	0.0172262	0.0902494	0.107476	-	-	-	0.531653	0.0112498	0.749316	0.539989	0.0227004	-		0.294712	0.409001	0.296287		1.82096	0.0454009	0.0243259		0.0227004		0.268398			0.426545	0.336276	0.03363	0.483673	0.393938	0.0523457
	TA	LH4	#210	52.0042	0.927176	1.41702	19.1998	0.558391	17.0622	9.37704	0.242559	bdl	100.891		1.94435	0.0260752	0.0556471	0.00679355	0.0624407	-	0.0142864	0.0142864	0.586043	0.0176832	0.950997	0.375643	0.0175833	-		0.19316	0.489067	0.317773		1.91268	0.0351666	0.0180541		0.0142864		0.262605			0.228274	0.544795	0.0467668	0.349977	0.601916	0
	TA	LH4	#217	49.9819	1.35077	1.90592	14.4731	0.376215	13.9693	16.2378	0.370465	bdl	98.772		1.90873	0.0388011	0.0857813	-	0.0857813	0.00548601	0.0410952	0.0465812	0.41564	0.012169	0.795272	0.664406	0.0274301	-		0.343516	0.411223	0.245261		1.87532	0.0548601	0.0284223		0.0274301		0.243009			0.685433	0.262658	0.018922	0.625786	0.318578	0
	TA	LH4	#178	52.5156	0.604581	0.714638	18.6786	0.613153	20.9115	6.07269	0.126297	bdl	100.274		1.94664	0.016857	0.0312204	-	0.0312204	0.0221435	0.027829	0.0499726	0.529051	0.0192509	1.15555	0.241185	0.00907685	-		0.120888	0.579256	0.299856		1.92579	0.0181537	0.0093386		0.00907685		Undef
	TA	LH4	#179	51.1037	1.33577	1.85922	13.8838	0.381745	15.8083	15.4355	0.372126	0.0439382	100.312		1.90673	0.0374885	0.0817568	-	0.0817568	0.0115157	0.0439193	0.0554351	0.377776	0.0120641	0.879284	0.617064	0.0269199	0.00129614		0.317796	0.452892	0.229311		1.87412	0.0538398	0.0279257		0.0269199		Undef
	TA	LH4	#181	49.746	1.59772	2.19749	14.1572	0.365563	13.6484	17.1211	0.410073	bdl	99.351		1.88956	0.0456494	0.0983754	-	0.0983754	0.0120602	0.0491378	0.061198	0.388518	0.0117612	0.77285	0.696801	0.0302003	-		0.360814	0.400237	0.238948		1.85817	0.0604007	0.0314822		0.0302003		Undef
	TA	LH4	#188	50.3335	1.39261	2.10611	13.6451	0.394499	15.4302	15.9444	0.373402	bdl	99.669		1.89081	0.0393505	0.0932457	-	0.0932457	0.0159394	0.0575812	0.0735206	0.35515	0.0125523	0.864116	0.641761	0.0271967	-		0.329586	0.443828	0.226586		1.86103	0.0543933	0.0283976		0.0271967		Undef
	TA	LH4	#189	50.705	1.13983	1.99038	11.4652	0.380378	15.7016	17.7038	0.313115	0.114504	99.518		1.89733	0.0320821	0.0877774	-	0.0877774	0.0148953	0.0578374	0.0727327	0.286049	0.0120557	0.875881	0.709792	0.0227165	0.00338755		0.36277	0.447707	0.189523		1.87172	0.045433	0.0236982		0.0227165		Undef
	TA	LH4	#193	51.4145	1.05114	1.78973	10.5986	0.243654	15.3809	19.1713	0.33315	0.0440695	100.027		1.91247	0.0294103	0.0784607	-	0.0784607	0.00907233	0.0514431	0.0605154	0.269179	0.00767659	0.852899	0.76407	0.0240267	0.00129605		0.390945	0.436443	0.172611		1.88615	0.0480534	0.0248441		0.0240267		0.229473			0.996603	0.183695	0.0111247	0.728371	0.230108	0
	TA	LH4	#197	49.835	1.70787	1.98529	15.5601	0.417326	13.5118	16.8793	0.417684	bdl	100.405		1.88102	0.0484891	0.0883158	-	0.0883158	0.0306666	0.0522726	0.0829392	0.408224	0.013342	0.760293	0.682631	0.030567	-		0.350519	0.39044	0.259042		1.85115	0.0611341	0.0319692		0.030567		Undef
	TA	LH4	#199	48.7574	1.85985	1.62939	19.4042	0.435772	13.0912	13.7168	0.370089	bdl	99.345		1.88077	0.0539639	0.0740759	-	0.0740759	0.0451525	0.0383821	0.0835345	0.542427	0.0142377	0.752806	0.56692	0.0276789	-		0.289248	0.384132	0.32662		1.86215	0.0553578	0.0288696		0.0276789		Undef
	TA	LH4	#200	51.3511	1.06508	1.71418	11.1593	0.256236	15.4752	18.6555	0.366218	0.0677791	100.121		1.90972	0.0297942	0.0751333	-	0.0751333	0.0151462	0.0551044	0.0702506	0.276817	0.00807135	0.857954	0.743361	0.0264063	0.00199293		0.379938	0.438556	0.181506		1.87813	0.0528125	0.0273506		0.0264063		Undef
	TA	LH4	#201	50.6066	1.23964	2.28938	10.3392	0.268892	15.0835	19.851	0.374513	0.115225	100.17		1.87977	0.0346355	0.100224	-	0.100224	0.020005	0.0745459	0.0945509	0.226624	0.00845982	0.835233	0.790047	0.0269719	0.00338393		0.404119	0.427278	0.168603		1.8519	0.0539438	0.0283044		0.0269719		Undef
	TA	LH4	#204	49.8772	1.55914	2.01694	14.1085	0.353915	14.0406	17.0787	0.358045	bdl	99.476		1.89028	0.0444467	0.0900892	-	0.0900892	0.0196323	0.0464398	0.0660721	0.381085	0.0113608	0.793263	0.693507	0.0263092	-		0.356494	0.407818	0.235688		1.86786	0.0526185	0.0273987		0.0263092		Undef
	TA	LH4	#205	49.9517	1.57245	2.04524	13.9823	0.364694	14.3168	17.1106	0.379915	bdl	99.785		1.88432	0.0446182	0.0909295	-	0.0909295	0.0247491	0.0541294	0.0788786	0.362224	0.0116525	0.805119	0.691582	0.0277868	-		0.354744	0.413028	0.232228		1.85892	0.0555735	0.0290277		0.0277868		Undef
	TA	LH4	#207	51.5324	0.926189	1.54373	12.2619	0.335333	16.3672	16.6955	0.309569	0.047447	100.055		1.91644	0.0259087	0.0676615	-	0.0676615	0.015894	0.0526644	0.0685583	0.312797	0.0105628	0.907401	0.665255	0.0223213	0.00139508		0.338612	0.461914	0.199475		1.88545	0.0446426	0.0231297		0.0223213		Undef
	TA	LH4	#208	49.5915	1.12482	1.54913	12.72	0.312354	15.352	17.4874	0.318842	bdl	98.497		1.88121	0.0320954	0.0692585	-	0.0692585	0.0495342	0.0772575	0.126792	0.276736	0.010036	0.868165	0.710769	0.0234505	-		0.356709	0.435748	0.207542		1.85567	0.046901	0.0246514		0.0234505		Undef
	TA	LH4	#209	50.57	1.31552	2.36221	11.5381	0.325219	16.022	17.1578	0.347599	0.152217	99.843		1.88346	0.0368544	0.10369	-	0.10369	0.0128492	0.0634494	0.0762986	0.283082	0.0102595	0.889586	0.684695	0.0251009	0.00448229		0.35221	0.457656	0.190135		1.85736	0.0502017	0.0263172		0.0251009		0.218084			1.02449	0.372937	0.0163154	0.634919	0.311151	0
	TA	LH4	#211	49.9517	1.3245	2.25271	11.8687	0.328471	15.3176	17.8475	0.322521	0.103891	99.328		1.87638	0.0374241	0.0997313	-	0.0997313	0.0238877	0.0691749	0.0930626	0.279785	0.0104509	0.857768	0.718324	0.0234896	0.0030855		0.366592	0.437804	0.195604		1.85588	0.0469792	0.0246888		0.0234896		Undef
	TA	LH4	#216	50.5752	1.36466	2.22604	10.336	0.277007	15.2504	19.0238	0.360287	0.0876783	99.522		1.89038	0.0383676	0.0980617	-	0.0980617	0.0115601	0.0564054	0.0679655	0.25512	0.00876974	0.849768	0.761872	0.0261099	0.00259106		0.391996	0.437268	0.170737		1.86676	0.0522198	0.0272123		0.0261099		Undef
	TA	LH4	#218	51.1734	1.09925	1.93387	11.7394	0.418373	16.0956	17.3484	0.325384	0.132424	100.285		1.89894	0.0306826	0.0845765	-	0.0845765	0.0164869	0.0592235	0.0757104	0.288596	0.0131497	0.890394	0.689762	0.0234105	0.00388514		0.352334	0.454868	0.192797		1.86875	0.0468209	0.0244422		0.0234105		Undef
	TA	LH15	#39	51.6633	0.686264	1.83637	9.98539	0.31742	15.5045	19.8056	0.34112	bdl	100.14		1.91418	0.0191259	0.0801893	-	0.0801893	0.00562819	0.0720707	0.0776989	0.231702	0.0099614	0.856382	0.786253	0.024505	-		0.400725	0.436515	0.16276		1.87434	0.0490101	0.0254817		0.024505		0.250872			0.76005	0.0924199	0.0159743	0.754706	0.209337	0
	TA	LH15	#41	52.039	0.668049	2.34964	6.79246	0.18056	16.3043	21.9406	0.300022	0.18998	100.771		1.89753	0.018323	0.100976	-	0.100976	0.00149373	0.0815575	0.0830512	0.124079	0.00557658	0.886278	0.8572	0.0212109	0.005477		0.438181	0.453094	0.108725		1.86756	0.0424218	0.0222106		0.0212109		0.25596			0.771047	0.0611976	0.0121618	0.815839	0.142608	0
	TA	LH15	#51	51.9217	0.473951	1.29347	10.8482	0.552822	14.1432	20.1276	0.340301	bdl	99.718		1.94693	0.0133679	0.0530726	0.00409018	0.0571628	-	0.0469872	0.0469872	0.293196	0.0175579	0.790603	0.808659	0.0247406	-		0.413199	0.404016	0.182785		1.89246	0.0494812	0.0254803		0.0247406		0.255984			0.746295	0.0717288	0.0139085	0.789248	0.17303	0
	TA	LH15	#66	51.6489	0.670894	2.17067	6.82167	0.245328	16.1454	21.4111	0.265845	0.187728	99.576		1.90746	0.0186371	0.0925377	0.00194344	0.0944811	-	0.0668743	0.0668743	0.143815	0.0076741	0.8889	0.847241	0.0190358	0.0054815		0.433462	0.454825	0.111713		1.87996	0.0380715	0.0198493		0.0190358		0.25673			0.759077	0.0635661	0.0126969	0.808369	0.14871	0
	TA	LH15	#83	52.1463	0.638465	2.0121	8.36736	0.230643	15.9965	20.7575	0.316268	bdl	100.489		1.91505	0.0176369	0.0849463	0.00214234	0.0870887	-	0.0698503	0.0698503	0.187131	0.00717435	0.875769	0.81678	0.0225195	-		0.417409	0.447603	0.134988		1.87968	0.045039	0.0234003		0.0225195		0.257721			0.726668	0.0724206	0.014374	0.784714	0.177372	0
	TA	LH15	#84	51.9203	0.660357	1.99276	8.31535	0.181668	14.9467	21.9903	0.317452	bdl	100.325		1.91707	0.0183404	0.0829305	0.00378769	0.0867182	-	0.0651881	0.0651881	0.191577	0.00568154	0.822726	0.869973	0.0227261	-		0.444948	0.42083	0.134222		1.88428	0.0454523	0.0235537		0.0227261		0.257546			0.768921	0.0524868	0.0109302	0.838495	0.123447	0
	TA	LH15	#106	52.3363	0.603489	1.89121	6.75742	0.137996	16.6182	21.3635	0.250951	0.12033	100.105		1.91945	0.0166484	0.0805503	0.00119629	0.0817466	-	0.0604127	0.0604127	0.146845	0.00428671	0.908583	0.839498	0.0178447	0.00348918		0.428378	0.463681	0.107941		1.89493	0.0356894	0.018486		0.0178447		0.255173			0.76718	0.0651387	0.012674	0.806754	0.157423	0
	TA	LH15	#130	52.0628	0.635991	2.11486	6.9132	0.150827	16.4152	21.5353	0.273373	0.127202	100.233		1.90839	0.0175356	0.0913642	-	0.0913642	0.000249085	0.0722844	0.0725334	0.139388	0.00468279	0.897004	0.845792	0.0194286	0.00368645		0.43164	0.457825	0.110536		1.88218	0.0388572	0.0202272		0.0194286		0.25555			0.766841	0.0639907	0.0125537	0.809107	0.15329	0
	TA	LH15	#131	51.2164	0.705089	2.24546	7.00503	0.139854	16.0691	21.6491	0.262435	0.15323	99.471		1.89369	0.0196098	0.0978499	-	0.0978499	0.00846108	0.0814254	0.0898865	0.126717	0.00437985	0.885726	0.857655	0.0188135	0.00447939		0.436588	0.450926	0.112486		1.8701	0.0376269	0.0197235		0.0188135		0.249052			0.840044	0.0653554	0.0116036	0.816044	0.147358	0
	TA	LH15	#133	51.8224	0.598838	1.86291	7.07625	0.165592	16.7072	20.7659	0.265711	0.109169	99.374		1.91431	0.0166393	0.081104	-	0.081104	0.00458327	0.0682509	0.0728342	0.145768	0.00518109	0.920042	0.8219	0.0190305	0.00318836		0.418096	0.468072	0.113832		1.88771	0.0380611	0.0197641		0.0190305		0.250732			0.793125	0.0760581	0.013526	0.788317	0.17864	0
	TA	LH15	#182	53.9993	0.474633	0.96889	15.4338	0.405416	21.2027	7.63833	0.119478	0.041364	100.333		1.98403	0.0131174	0.0159712	0.0259844	0.0419556	-	-	-	0.474228	0.0126167	1.16134	0.300698	0.00851128	0.00120159		0.154285	0.595934	0.249782		1.93627	0.0170226	0.00871482		0.00851128		0.263792			0.168005	0.480201	0.0770053	0.282748	0.674598	0.0130052
	TA	LH15	#167	52.2912	0.700608	1.39188	16.3324	0.488175	20.3945	8.39421	0.229989	bdl	100.27		1.92902	0.0194407	0.0605154	-	0.0605154	0.0104681	0.0483525	0.0588206	0.445043	0.0152535	1.12158	0.331788	0.0164498	-		0.1682	0.568647	0.263153		1.89841	0.0328997	0.0170349		0.0164498		Undef
	TA	LH17	#269	50.935	0.888699	2.1281	9.21152	0.233609	15.4199	20.294	0.347534	bdl	99.471		1.89641	0.0248886	0.0933821	-	0.0933821	0.0102043	0.0788969	0.0891013	0.197715	0.00736703	0.85587	0.809577	0.0250877	-		0.413111	0.436781	0.150108		1.86316	0.0501755	0.026224		0.0250877		0.247901			0.824121	0.114724	0.0108287	0.771022	0.190135	0
	TA	LH17	#270	50.679	0.855544	2.25889	8.79033	0.226987	15.5226	20.4833	0.341554	0.0641702	99.235		1.88846	0.0239801	0.099204	-	0.099204	0.0123383	0.0863682	0.0987065	0.175224	0.00716418	0.862289	0.817811	0.0246766	0.00189055		0.416979	0.439705	0.143315		1.85532	0.0493532	0.0259116		0.0246766		0.246525			0.845427	0.113252	0.0104855	0.77579	0.184955	0
	TA	LH17	#275	51.8709	0.649383	1.59405	9.15919	0.259829	16.1867	19.4078	0.341908	bdl	99.476		1.92625	0.0181392	0.0697663	-	0.0697663	0.00398664	0.062092	0.0660786	0.218368	0.00817262	0.896098	0.772213	0.0246175	-		0.393783	0.457006	0.149211		1.88668	0.0492351	0.0254325		0.0246175		0.252733			0.740378	0.126327	0.0126337	0.744989	0.221061	0
	TA	LH17	#308	52.2858	0.558851	1.32446	10.0659	0.436234	14.8066	20.1288	0.291381	bdl	99.915		1.94963	0.0156745	0.0503682	0.00783726	0.0582054	-	0.0317484	0.0317484	0.282142	0.0137776	0.823063	0.804193	0.0210658	-		0.411353	0.42105	0.167597		1.9094	0.0421315	0.021589		0.0210658		0.259194			0.723807	0.0949662	0.0109006	0.783478	0.178245	0
	TA	LH17	#372	50.852	1.26135	2.31303	12.7257	0.410199	15.3965	16.8571	0.294988	bdl	100.207		1.89725	0.0353982	0.101708	-	0.101708	0.00104699	0.0524991	0.0535461	0.343512	0.0129627	0.856338	0.673863	0.0213387	-		0.347299	0.441392	0.211308		1.87371	0.0426773	0.0222696		0.0213387		0.256623			0.595734	0.218298	0.0212018	0.629806	0.314778	0
	TA	LH17	#373	50.9614	1.4328	2.29179	11.4834	0.312578	14.9074	18.2654	0.346207	0.0845619	100.119		1.90184	0.0402206	0.0981561	0.00264478	0.100801	-	0.0376257	0.0376257	0.320766	0.00988049	0.829362	0.730358	0.0250505	0.00249507		0.378803	0.4302	0.190997		1.88049	0.0501011	0.0259512		0.0250505		0.256619			0.670235	0.166225	0.0168491	0.685541	0.253054	0
	TA	LH17	#381	51.7619	1.01298	1.88261	11.7964	0.291416	16.1506	16.7494	0.278138	bdl	99.974		1.92651	0.0283589	0.0734934	0.00908682	0.0825803	-	0.0272605	0.0272605	0.339907	0.00918668	0.896101	0.667931	0.0200709	-		0.344212	0.461847	0.193941		1.90394	0.0401418	0.0206482		0.0200709		0.262305			0.557433	0.199218	0.0212508	0.634867	0.315723	0
	TA	LH17	#348	51.3991	0.970084	1.66463	11.621	0.331345	16.2351	17.0582	0.3281	bdl	99.653		1.91691	0.0272136	0.0731677	-	0.0731677	0.00991851	0.0517856	0.0617041	0.300745	0.0104668	0.902634	0.681636	0.0237247	-		0.348259	0.461221	0.19052		1.88502	0.0474493	0.0245538		0.0237247		0.227137			0.900227	0.30208	0.0172786	0.648434	0.311658	0
	TA	LH17	#363	49.159	1.81353	3.06024	11.9862	0.313333	14.8295	17.8688	0.446234	0.17455	99.693		1.8424	0.0511252	0.135173	-	0.135173	0.0224294	0.082606	0.105035	0.270645	0.00994654	0.828547	0.717543	0.0324257	0.0051722		0.37144	0.428948	0.199612		1.81674	0.0648514	0.0344664		0.0324257		Undef
	TA	LH21-2	#60	51.3413	1.13866	2.17789	12.0202	0.326501	15.7646	17.0751	0.324043	0.10867	100.319		1.90757	0.0318228	0.0924259	0.00294286	0.0953687	-	0.0459885	0.0459885	0.327506	0.0102751	0.873183	0.679752	0.0233434	0.00319226		0.35097	0.450892	0.198138		1.88044	0.0466868	0.0242261		0.0233434		0.258898			0.582265	0.216021	0.0186304	0.638494	0.306594	0
	TA	LH21-2	#69	51.6606	0.94494	1.90291	10.9491	0.394154	16.3444	17.3659	0.356875	0.275829	100.199		1.91349	0.0263269	0.0830695	-	0.0830695	0.00344045	0.0514073	0.0548478	0.284311	0.0123657	0.902496	0.689188	0.0256289	0.00807758		0.35465	0.464467	0.180883		1.87599	0.0512578	0.0265963		0.0256289		0.251346			0.647476	0.224892	0.0172742	0.649461	0.298958	0
	TA	LH21-2	#72	51.0705	1.19619	2.05019	10.4143	0.220654	15.286	18.7838	0.338757	0.178979	99.577		1.90841	0.0336227	0.0902923	-	0.0902923	0.00129702	0.0435997	0.0448967	0.280555	0.00698394	0.851541	0.75207	0.0245435	0.00528784		0.388441	0.439866	0.171693		1.88417	0.0490871	0.0253909		0.0245435		0.251715			0.723402	0.163809	0.0132973	0.710287	0.235652	0
	TA	LH21-2	#52	50.7683	1.0697	1.90118	10.045	0.229626	15.5898	19.1445	0.339417	0.192081	99.309		1.89772	0.0300767	0.0837566	-	0.0837566	0.0185241	0.0610497	0.0795737	0.234439	0.00727019	0.868738	0.766756	0.0245991	0.00567673		0.391831	0.443994	0.164175		1.86993	0.0491983	0.0256357		0.0245991		Undef
	TA	LH21-2	#54	51.7059	0.876869	1.08303	12.1784	0.425613	16.5262	16.5187	0.279587	0.0675496	99.687		1.93022	0.0246224	0.0476499	-	0.0476499	0.0221303	0.0387778	0.0609081	0.319294	0.0134576	0.919703	0.660719	0.0202363	0.00199372		0.334683	0.465921	0.199396		1.89972	0.0404725	0.0208601		0.0202363		Undef
	TA	LH21-2	#56	52.2249	0.789707	1.03754	13.7452	0.489653	17.3151	13.9024	0.241509	0.0609172	99.807		1.94912	0.0221695	0.0456372	-	0.0456372	0.00524279	0.0222194	0.0274622	0.401548	0.0154787	0.963375	0.555936	0.017476	0.00179753		0.28308	0.4906	0.22632		1.92086	0.0349519	0.0178708		0.017476		Undef
	TA	LH21-2	#57	51.3273	1.01594	1.14423	14.2632	0.415209	15.5682	15.3701	0.276853	bdl	99.411		1.93752	0.0288466	0.0509058	-	0.0509058	0.0115786	0.0246544	0.036233	0.414034	0.0132754	0.876079	0.62165	0.0202625	-		0.316951	0.446722	0.236327		1.91176	0.040525	0.0207577		0.0202625		Undef
	TA	LH21-2	#61	51.6044	0.94465	1.5986	10.2957	0.305058	16.0866	18.923	0.313731	0.166808	100.247		1.90995	0.0262987	0.0697315	-	0.0697315	0.0203218	0.0550879	0.0754097	0.243263	0.00956318	0.887583	0.750411	0.0225133	0.00488121		0.381634	0.451444	0.166922		1.88126	0.0450266	0.0233749		0.0225133		Undef
	TA	LH21-2	#64	50.9966	0.987285	1.82484	10.3505	0.32054	15.5428	18.7412	0.291043	0.168331	99.246		1.91007	0.0278152	0.0805543	-	0.0805543	0.00937142	0.0504461	0.0598176	0.264394	0.010169	0.867853	0.752106	0.0211355	0.0049848		0.384824	0.444095	0.171081		1.88435	0.0422711	0.0219405		0.0211355		0.228964			0.993181	0.217211	0.0116098	0.713348	0.242399	0
	TA	LH21-2	#65	50.5647	1.31198	2.23592	11.1467	0.302302	15.0593	18.6475	0.381055	0.161928	99.826		1.88886	0.0368645	0.0984382	-	0.0984382	0.0127033	0.0602287	0.072932	0.275288	0.00956485	0.838618	0.746357	0.0275986	0.00478242		0.384159	0.431694	0.184147		1.86026	0.0551972	0.0288166		0.0275986		Undef
	TA	LH21-2	#66	50.7668	1.00686	1.82861	10.1238	0.254129	15.528	18.9956	0.309754	0.225193	99.07		1.9035	0.0283971	0.0808071	-	0.0808071	0.0156931	0.0555486	0.0712417	0.246207	0.00807074	0.867954	0.763134	0.0225184	0.0066758		0.390013	0.443632	0.166355		1.87729	0.0450367	0.0234282		0.0225184		Undef
	TA	LH21-2	#67	51.2161	0.928793	1.55209	10.2097	0.343153	15.6816	19.0088	0.276437	0.175378	99.415		1.91424	0.0261119	0.0683693	-	0.0683693	0.0173913	0.0483867	0.065778	0.253345	0.0108633	0.873751	0.761231	0.0200324	0.00518251		0.387386	0.444695	0.16792		1.88833	0.0400648	0.0207763		0.0200324		Undef
	TA	LH21-2	#68	50.6671	1.13423	2.04726	10.7756	0.245521	16.0369	17.794	0.335524	0.303493	99.373		1.89306	0.0318765	0.0901507	-	0.0901507	0.016785	0.0585232	0.0753082	0.261387	0.00776989	0.893239	0.71234	0.0243058	0.00896526		0.365279	0.458092	0.176629		1.86697	0.0486116	0.025377		0.0243058		Undef
	TA	LH21-2	#75	51.437	0.796305	1.50878	10.0592	0.258874	16.1506	18.7675	0.307552	0.14543	99.448		1.91637	0.0223158	0.0662499	-	0.0662499	0.0173844	0.0569351	0.0743194	0.239097	0.00816916	0.897014	0.749172	0.0222161	0.00428383		0.380705	0.455883	0.163412		1.88528	0.0444323	0.0230253		0.0222161		Undef
	TA	LH26-1	#125	51.6332	0.643735	1.79175	8.26044	0.273135	16.0401	20.7708	0.245578	bdl	99.683		1.91171	0.0179278	0.0781853	-	0.0781853	0.0101093	0.0696696	0.0797789	0.175992	0.00856552	0.885337	0.823983	0.017629	-		0.417473	0.448607	0.13392		1.88531	0.0352581	0.0183581		0.017629		0.244864			0.752605	0.0865149	0.00693676	0.791622	0.178585	0
	TA	LH26-2	#248	50.3337	0.969281	5.05772	14.5398	0.334223	17.1013	9.63868	0.695602	bdl	98.888		1.88315	0.0272775	0.116854	0.106162	0.223016	-	0.00659456	0.00659456	0.44833	0.0105913	0.953813	0.386381	0.0504584	-		0.213968	0.528254	0.257778		1.78852	0.100917	0.0534109		0.00659456		0.288891			0.198673	0.360716	0.0412714	0.300527	0.555103	0.0586183
	TA	LH27-2	#25	52.7218	0.533493	1.66307	8.09863	0.183709	16.5686	20.78	0.267515	0.0586969	100.899		1.92466	0.0146495	0.0715531	-	0.0715531	0.00378694	0.0632817	0.0670686	0.180178	0.0056804	0.901689	0.812796	0.0189347	0.00169416		0.413111	0.458342	0.128546		1.89466	0.0378694	0.0195957		0.0189347		0.250444			0.691918	0.0799652	0.00876453	0.784415	0.185542	0
	TA	LH27-2	#26	51.6768	0.689687	2.12022	8.55801	0.224471	16.1918	20.8857	0.322203	0.0549659	100.726		1.89243	0.0189979	0.0915081	-	0.0915081	0.0160637	0.0908616	0.106925	0.155166	0.00696258	0.883949	0.819495	0.022877	0.00159145		0.415443	0.448167	0.13639		1.85861	0.0457541	0.0240259		0.022877		0.234795			0.863395	0.0979293	0.00808143	0.780796	0.187779	0
	TA	LH27-2	#123	52.1081	0.569866	1.87146	7.81495	0.20179	16.5097	20.8261	0.285449	0.0446081	100.232		1.91286	0.0157355	0.080968	-	0.080968	0.00617468	0.0746938	0.0808684	0.159048	0.00627428	0.903496	0.819142	0.0203167	0.00129469		0.416037	0.45893	0.125033		1.88169	0.0406334	0.0211377		0.0203167		0.250013			0.698909	0.0791175	0.00862976	0.786965	0.182102	0
	TA	LH27-2	#140	51.9986	0.502498	1.71807	7.99337	0.248625	16.283	20.7579	0.268748	0.07171	99.868		1.91837	0.0139446	0.0747031	-	0.0747031	0.00692248	0.0708683	0.0777908	0.168829	0.00776912	0.89554	0.820538	0.0192236	0.00209169		0.4164	0.454511	0.129089		1.88491	0.0384472	0.0199896		0.0192236		0.248213			0.718208	0.0789668	0.00838266	0.790465	0.179631	0
	TA	LH27-2	#41	50.6026	0.599899	2.05624	7.243	0.156691	16.1619	20.7998	0.301186	0.100718	98.022		1.89682	0.0169146	0.0908413	-	0.0908413	0.0123377	0.0882543	0.100592	0.126461	0.00497488	0.903139	0.835381	0.0218895	0.00298493		0.423915	0.458348	0.117737		1.86498	0.0437789	0.0229358		0.0218895		0.244357			0.765413	0.0789508	0.00789163	0.797366	0.17119	0
	TA	LH27-2	#69	51.3353	0.386405	1.0731	10.1917	0.392616	14.1097	20.0519	0.33358	bdl	97.918		1.95644	0.011077	0.0435596	0.00464037	0.0482	-	0.0407155	0.0407155	0.28411	0.0126737	0.801637	0.818801	0.0246489	-		0.418181	0.409459	0.17236		1.90455	0.0492977	0.0252311		0.0246489		0.254963			0.669713	0.068396	0.00821393	0.802939	0.163726	0
	AB	LH5-2	#68	48.921	1.76735	1.96905	14.959	0.305436	10.1958	19.584	0.577323	bdl	98.283		1.90637	0.0518042	0.0904327	-	0.0904327	0.00319409	0.0336378	0.0368319	0.450666	0.0100813	0.592304	0.817687	0.0436193	-		0.428645	0.310529	0.260826		1.86066	0.0872386	0.0447861		0.0368319		0.258414			0.870556	0.129312	0.0127516	0.776356	0.153395	0
	AB	LH5-2	#99	48.622	1.44236	1.35325	17.6603	0.351216	7.73718	19.2274	0.820019	bdl	97.255		1.94218	0.0433372	0.0578162	0.00589146	0.0637076	-	0.028259	0.028259	0.561686	0.0118828	0.460732	0.822907	0.0635079	-		0.436443	0.244384	0.319174		1.84532	0.127016	0.0643985		0.028259		0.273403			0.752016	0.100222	0.0125431	0.798178	0.127546	0
	AB	LH27-1	#53	47.6946	2.32544	3.90953	10.527	0.235308	12.2805	21.3477	0.515331	0.265353	99.107		1.80916	0.06635	0.174778	-	0.174778	0.0160653	0.0880853	0.104151	0.229788	0.00756012	0.694437	0.867623	0.0379001	0.00795802		0.455776	0.364838	0.179386		1.79185	0.0758002	0.0405859		0.0379001		0.2478			1.022	0.134226	0.0123481	0.783749	0.126828	0
	AB	LH27-1	#198	48.3676	2.54161	3.71027	10.5208	0.261875	12.6843	20.995	0.408578	0.126914	99.617		1.82572	0.0721637	0.165059	-	0.165059	0.00921981	0.0560664	0.0652862	0.266826	0.00837258	0.713762	0.849119	0.0299021	0.0037876		0.4461	0.375029	0.178871		1.82971	0.0598041	0.0316506		0.0299021		0.250331			0.97469	0.141894	0.0134495	0.769714	0.140941	0
	AB	LH27-1	#168	48.2633	2.39192	2.49726	15.6994	0.407915	9.75642	19.0302	0.521401	bdl	98.59		1.88443	0.0702491	0.114917	-	0.114917	0.000649529	0.0140398	0.0146894	0.497939	0.0134902	0.567888	0.796123	0.0394714	-		0.421192	0.300476	0.278331		1.86195	0.0789428	0.0406734		0.0146894		0.25192			0.924504	0.164977	0.0156402	0.740264	0.170802	0
	AB	LH27-1	#170	48.9731	1.55387	0.934747	21.0059	0.393428	5.5166	19.2503	0.613094	bdl	98.356		1.97216	0.0470682	0.0278404	0.016524	0.0443643	-	-	-	0.707426	0.0134195	0.33118	0.830604	0.0478694	-		0.441194	0.175933	0.382874		1.86921	0.0957388	0.0487233		0.0478694		0.27238			0.766955	0.0905731	0.0124791	0.812298	0.1119	0
[truncated: 4 more columns]

## Sheet: S2e - CPX5
	Table S2e. Clinopyroxene: complete dataset for the EMPA, chemical formulae and thermobarometry results of CPX5 group from LHPCS lavas
	Rock Type	Sample	Spot																																						KD cpx-liq(Mg-Fe)	KD cpx-liq(Mg-Fe)		Predicted			Observed (Putirka et al. 1996)
		(thin section)		SiO2	TiO2	Al2O3	FeOtot	MnO	MgO	CaO	Na2O	Cr2O3	Total		Si	Ti	Al[IV]	Al[VI]	AlTot	Fe3+ [IV]	Fe3+ [VI]	Fe3+ Tot	Fe2+	Mn	Mg	Ca	Na	Cr		XWo	XEn	XFs		Q	J	J/(J+Q)		XAeg			[eq. 35]	[eq. 35a]		XEnFs	XDiHd	XCaTs	XEnFs	XDiHd	XCaTs
				(wt%)											(apfu)																													[eq. 3.1a]	[eq. 3.2]	[eq. 3.4]
	AB	LH5-2	#29	51.1366	2.79602	0.372491	16.2642	0.313394	8.06751	14.5955	3.8953	bdl	97.453		1.99017	0.0818516	0.00983411	0.00725142	0.0170855	-	0.13281	0.13281	0.396543	0.0103308	0.468064	0.608622	0.293931	-		0.376531	0.289604	0.333865		1.47323	0.587861	0.285219		0.13281			0.289389	0.066596		0.60341	0.213794	0.028571	0.615464	0.196583	0
	AB	LH5-2	#83	48.1643	1.28598	1.21428	19.5773	0.486094	6.67333	19.0189	0.937681	bdl	97.414		1.93527	0.0388669	0.0575031	-	0.0575031	0.00722525	0.0592471	0.0664723	0.591375	0.0165433	0.399731	0.818796	0.0730498	-		0.432555	0.211194	0.356251		1.8099	0.1461	0.074693		0.0664723			0.261923	0.0399889		0.850299	0.111551	0.0118207	0.796221	0.133695	0
	AB	LH5-2	#88	50.978	1.73372	12.23	7.25292	0.130203	9.36551	17.3511	1.7064	0.12205	100.952		1.87188	0.0478854	0.128116	0.401154	0.52927	-	-	-	0.222723	0.00404951	0.512667	0.682645	0.121485	0.00354332		0.480016	0.360532	0.159452		1.41804	0.24297	0.146279		0.121485			0.310792	0.135255		0.542063	0.321476	0.0544125	0.433451	0.143553	0.233689
	AB	LH5-2	#1	49.156	1.72001	0.859763	18.9755	0.399769	7.10902	19.3436	1.28635	bdl	98.85		1.93741	0.0509922	0.0399373	-	0.0399373	0.0226577	0.0589099	0.0815676	0.543884	0.0133456	0.417698	0.816871	0.0982994	-		0.436041	0.222989	0.340969		1.77845	0.196599	0.0995411		0.0815676			Undef	Undef
	AB	LH5-2	#5	48.6887	1.78716	0.795676	20.6314	0.38868	6.06462	18.5449	1.30435	bdl	98.298		1.94559	0.0537174	0.0374726	-	0.0374726	0.0169424	0.047339	0.0642814	0.625174	0.0131553	0.361272	0.794	0.101056	-		0.427367	0.194474	0.378159		1.78045	0.202113	0.101945		0.0642814			Undef	Undef
	AB	LH5-2	#16	50.6212	1.46914	0.809583	15.3644	0.401675	9.46165	18.7129	1.13201	bdl	98.107		1.97771	0.0431741	0.0222866	0.014991	0.0372776	-	0.00619628	0.00619628	0.495803	0.013292	0.551069	0.78333	0.0857486	-		0.423485	0.297952	0.278563		1.8302	0.171497	0.0856758		0.00619628			0.279358	0.0692943		0.700644	0.109556	0.0145284	0.773724	0.140203	0
	AB	LH5-2	#23	50.9176	1.93165	4.08921	13.2505	0.309339	9.89564	18.3626	1.28585	bdl	100.16		1.92882	0.0550404	0.0711815	0.111384	0.182566	-	-	-	0.41977	0.00992531	0.558825	0.745301	0.0944408	-		0.42985	0.322336	0.247814		1.7239	0.188882	0.0987473		0.0944408			0.302925	0.0800139		0.575753	0.13512	0.022238	0.697928	0.138233	0.0082857
	AB	LH5-2	#39	51.7536	1.56819	0.230323	25.7844	0.209772	1.45506	4.75607	10.0601	bdl	95.833		2.03483	0.0463785	-	0.0106729	0.0106729	-	0.5938	0.5938	0.254014	0.00698588	0.085286	0.200359	0.766895	-		0.17569	0.0747934	0.749517		0.539659	1.53379	0.739729		0.5938			0.326522	0.000231056		0.352055	0.450924	0.0747804	0.210804	0.38547	0
	AB	LH5-2	#55	50.2797	0.99083	0.309777	17.8209	0.356724	7.80822	18.2499	1.69733	bdl	97.545		1.98889	0.0294813	0.0111053	0.00333657	0.0144419	-	0.0789821	0.0789821	0.510545	0.0119519	0.460447	0.773487	0.130176	-		0.421419	0.250893	0.327688		1.74448	0.260352	0.129862		0.0789821			0.279171	0.0521973		0.702548	0.106802	0.0141887	0.778715	0.139178	0
	AB	LH5-2	#86	50.342	1.11909	0.622003	16.9875	0.411854	8.46988	17.9705	1.5189	bdl	97.497		1.98658	0.0332178	0.0134168	0.0155116	0.0289284	-	0.0473827	0.0473827	0.51323	0.0137659	0.498267	0.759819	0.116212	-		0.414638	0.271937	0.313426		1.77132	0.232425	0.115995		0.0473827			0.283844	0.058943		0.664727	0.113792	0.015796	0.760248	0.151516	0
	AB	LH5-2	#95	48.9654	1.78434	0.485947	19.2976	0.54094	6.76995	18.0183	1.56172	bdl	97.486		1.95915	0.0537013	0.0229152	-	0.0229152	0.0179336	0.0540002	0.0719338	0.573777	0.0183322	0.403806	0.772442	0.121152	-		0.419737	0.219448	0.360816		1.75002	0.242303	0.121618		0.0719338			Undef	Undef
	AB	LH5-2	#116	49.7276	1.14725	0.559794	18.9489	0.45018	6.86898	17.7751	2.17236	bdl	97.695		1.96886	0.0341668	0.0261217	-	0.0261217	0.00501577	0.129268	0.134284	0.493134	0.015097	0.405433	0.754054	0.166762	-		0.418451	0.225013	0.356536		1.65262	0.333524	0.167925		0.134284			0.280214	0.0429451		0.693023	0.118139	0.0156381	0.758273	0.143212	0
	AB	LH5-2	#118	49.2852	1.05745	0.592379	19.3323	0.429798	7.05497	17.4978	1.97148	bdl	97.239		1.96315	0.031683	0.0278095	-	0.0278095	0.00903809	0.125739	0.134777	0.509212	0.0145007	0.41893	0.746785	0.152257	-		0.409373	0.229674	0.360953		1.67493	0.304514	0.153838		0.134777			0.277101	0.043823		0.700593	0.127695	0.0160946	0.748125	0.163474	0
	AB	LH5-2	#123	48.6227	1.51028	0.85211	19.1515	0.63686	6.36645	18.8875	1.40519	bdl	97.507		1.94758	0.0455032	0.040226	-	0.040226	0.0121972	0.0703458	0.082543	0.558982	0.0216066	0.380156	0.810594	0.109128	-		0.43724	0.205081	0.35768		1.74973	0.218256	0.110903		0.082543			0.254375	0.0392102		0.947551	0.119095	0.0112272	0.797167	0.115946	0
	AB	LH5-2	#14	51.5511	1.08275	1.9076	28.7147	0.279253	0.945435	0.801091	8.80492	bdl	95.381		2.06521	0.0326275	-	0.0900676	0.0900676	-	0.397685	0.397685	0.564339	0.00947566	0.0564632	0.0343859	0.683908	-		0.0323691	0.0531573	0.914474		0.655188	1.36782	0.676131		0.397685			0.360973	0.00149059		0.247039	0.40354	0.0834926	0.035512	0.511926	0
	AB	LH5-2	#30	52.2198	0.173467	0.266132	29.0204	0.251812	1.41388	2.3302	11.9712	bdl	97.698		1.98882	0.00496942	0.0111812	0.000764526	0.0119457	-	0.884461	0.884461	0.0398509	0.00812309	0.0802752	0.0950879	0.883983	-		0.085838	0.0724742	0.841688		0.215214	1.76797	0.89148		0.883983			0.337992	0.000344725		0.26618	0.455535	0.0815682	0.102677	0.491044	0
	AB	LH5-2	#41	49.1029	2.42497	1.12043	19.581	0.324546	7.03982	19.9206	1.3065	bdl	100.845		1.90151	0.0706362	0.0511366	-	0.0511366	0.0473561	0.0548177	0.102174	0.53196	0.0106452	0.406407	0.826543	0.0980948	-		0.440179	0.216458	0.343363		1.76491	0.19619	0.100041		0.0980948			Undef	Undef
	AB	LH27-1	#111	47.8301	1.20214	3.22534	22.4353	0.505848	2.9125	18.1156	2.27792	bdl	98.97		1.90411	0.0359976	0.0958945	0.0554344	0.151329	-	0.143594	0.143594	0.603332	0.0170567	0.172848	0.772709	0.175823	-		0.452003	0.10112	0.446876		1.54889	0.351646	0.185025		0.143594			0.29865	Undef		0.611234	0.10626	0.0191266	0.748619	0.0920324	0
	AB	LH27-1	#23	48.125	0.488882	0.393589	31.6772	1.49543	8.56429	3.40967	1.81855	bdl	96.004		1.99085	0.0152125	0.0091474	0.0100423	0.0191897	-	0.113945	0.113945	0.981954	0.0523987	0.528163	0.151131	0.145861	-		0.082694	0.289025	0.62828		1.66125	0.291723	0.149374		0.113945			0.305949	4.0084		0.120138	0.567666	0.0841304	0.152288	0.74372	0
	AB	LH27-1	#24	46.46	2.3643	0.720417	26.3041	0.545735	2.81347	18.2329	1.38402	bdl	98.849		1.89652	0.0725955	0.0346591	-	0.0346591	0.0688217	0.0677293	0.136551	0.761408	0.0188689	0.17121	0.797458	0.109539	-		0.422949	0.090815	0.486236		1.73008	0.219077	0.112396		0.109539			Undef	0.170756
	AB	LH27-1	#44	46.9608	1.54109	0.79513	24.5912	0.547432	4.3381	18.358	1.01072	bdl	98.177		1.91249	0.0472085	0.0381643	-	0.0381643	0.0493453	0.0724029	0.121748	0.71578	0.0188834	0.263374	0.801053	0.0798072	-		0.417036	0.13713	0.445834		1.78021	0.159614	0.082283		0.0798072			Undef	0.496818
	AB	LH27-1	#69	46.2158	2.54026	0.938516	25.508	0.387466	2.78526	18.8817	1.2927	bdl	98.605		1.8892	0.0781079	0.0452151	-	0.0452151	0.0655868	0.0570406	0.122627	0.749379	0.0134155	0.169731	0.82699	0.102455	-		0.439394	0.0901906	0.470416		1.7461	0.204909	0.105027		0.102455			Undef	1.44694
	AB	LH27-1	#164	48.9527	1.10511	1.38968	24.5103	0.623206	3.87509	16.969	0.954152	bdl	98.621		1.98679	0.0337371	0.0132145	0.0532586	0.0664731	-	-	-	0.831915	0.0214236	0.234458	0.737912	0.0750826	-		0.404182	0.128435	0.467382		1.80428	0.150165	0.0768325		0.0750826			0.292029	Undef		0.607209	0.12266	0.0201852	0.727998	0.168246	0
	AB	LH27-1	#171	50.3142	1.54186	2.25263	20.7299	0.416734	4.97397	16.9966	1.21976	bdl	98.91		2.00452	0.0462056	-	0.105771	0.105771	-	-	-	0.690673	0.0140626	0.295415	0.725529	0.0942193	-		0.420431	0.171206	0.408362		1.71162	0.188439	0.0991753		0.0942193			0.300669	Undef		0.586261	0.123516	0.0221441	0.71443	0.132183	0.0011633
	TA	LH15	#157	56.1986	0.360125	16.0794	6.92237	0.174744	7.17654	7.45426	4.25908	bdl	99.067		2.06501	0.00995357	-	0.696339	0.696339	-	-	-	0.212719	0.00543855	0.393115	0.293476	0.30343	-		0.324362	0.434534	0.241105		0.89931	0.60686	0.402916		0.30343			Undef	9.1302
	TA	LH15	#159	53.0655	1.05187	8.83607	12.7364	0.386534	14.8223	5.58671	2.32042	bdl	98.994		1.9641	0.0292848	0.0358991	0.349549	0.385448	-	-	-	0.394234	0.0121178	0.817854	0.221555	0.166519	-		0.153237	0.565726	0.281037		1.43364	0.333039	0.188511		0.166519			0.320449	Undef		0.193573	0.3129	0.0973419	0.0701756	0.561176	0.147804
	TA	LH15	#166	53.8997	1.76563	5.06978	11.719	0.327593	11.567	13.5996	1.02401	bdl	100.017		2.02623	0.0499266	-	0.224619	0.224619	-	-	-	0.368424	0.0104309	0.648235	0.547775	0.0746367	-		0.347812	0.411645	0.240543		1.56443	0.149273	0.0871055		0.0746367			0.285804	0.840263		0.455608	0.267441	0.0615732	0.404991	0.295306	0.131141
	TA	LH15	#171	52.8618	0.616933	5.23017	15.2035	0.456035	16.311	6.43651	1.32538	bdl	98.633		1.98354	0.0174127	0.0164566	0.214841	0.231298	-	-	-	0.477089	0.0144938	0.912408	0.258776	0.0964243	-		0.155623	0.548764	0.295614		1.64827	0.192849	0.104745		0.0964243			0.301498	0.24444		0.1775	0.355137	0.0919006	0.159828	0.607375	0.0956714
	TA	LH17	#368	54.4807	1.3201	7.01726	18.0897	0.482726	8.33851	6.16514	2.31422	bdl	99.532		2.08552	0.038011	-	0.316589	0.316589	-	-	-	0.579109	0.0156516	0.475849	0.252865	0.171761	-		0.191058	0.359579	0.449363		1.30782	0.343522	0.208026		0.171761			0.322478	Undef		0.24909	0.40475	0.0726129	0.0750094	0.475971	0.171142
	TA	LH17	#37	52.4977	0.44299	13.8699	5.11772	0.119311	7.7847	14.4892	3.46116	bdl	98.137		1.94732	0.0123601	0.0526822	0.55367	0.606352	-	-	-	0.158756	0.00374854	0.430475	0.575857	0.248924	-		0.492659	0.368321	0.139019		1.16509	0.497847	0.299379		0.248924			0.3079	Undef		0.481451	0.351626	0.0571677	0.30766	0.134481	0.255429
	TA	LH26-2	#253	53.7194	0.623842	6.89344	13.719	0.311426	17.128	6.97621	1.60251	bdl	101.303		1.94315	0.0169738	0.0568473	0.237031	0.293878	-	-	-	0.415005	0.00954151	0.923618	0.270376	0.112389	-		0.167041	0.570683	0.262276		1.609	0.224778	0.122576		0.112389			0.307942	0.00912386		0.163733	0.361499	0.049868	0.158993	0.584993	0.109336
	TA	LH26-2	#257	49.6313	1.87035	7.76367	10.3827	0.208425	11.8184	18.2913	1.11363	bdl	101.191		1.82882	0.0518402	0.171183	0.165979	0.337161	-	-	-	0.319948	0.00650504	0.649203	0.72216	0.0795617	-		0.425333	0.382405	0.192262		1.69131	0.159123	0.0859924		0.0795617			0.285991	0.0228392		0.467343	0.154197	0.019536	0.592243	0.187828	0.0837238
