# Supplementary material for: Anatomy of the magmatic plumbing system of Los Humeros Caldera (Mexico): implications for geothermal systems
Source: Copernicus journal article supplement (doi:10.5194/se-2019-86), 2019-05-22
Supplement: Supplementary file 2 [file S-Table1 - Feld.xlsx]

## Sheet: S1a Pl-core
	Table S1a. Fedspar: complete dataset for the EMPA, chemical formulae and thermobarometry results of plagioclase phenocrysts cores from LHPCS lavas
	Rock Type	Sample	Spot																							KD pl-liq(An-Ab)	X(An)liq		(H2Oliq)	T (°C)	P (kbar)
		(thin section)		SiO2	TiO2	Al2O3	FeOtot	MnO	MgO	CaO	Na2O	K2O	Total		Si	Al	Fe3+	Ca	Na	K		XAn	XAb	XOr			[eq. 31]		[eq. 25b]	[eq. 24a]	[eq. 25a]
				(wt%)											(apfu)
	TA	LH4	#87	52.032	0.0598679	28.442	0.659635	bdl	0.115166	12.9581	4.07909	0.158846	98.526		2.40056	1.54653	0.0254508	0.640556	0.364882	0.00934928		0.631222	0.359565	0.00921305		0.168337	0.63		0.13649	1205.58	5.60109
	TA	LH4	#88	52.356	bdl	28.4263	0.650382	bdl	0.0926307	12.6567	4.13671	0.192189	98.565		2.41145	1.54308	0.0250517	0.624606	0.369415	0.0112927		0.621304	0.367463	0.0112331		0.174781	0.63		0.14536	1204.73	5.79644
	TA	LH4	#89	51.6135	0.0595024	28.3632	0.628848	bdl	0.105081	12.738	4.17249	0.208309	97.889		2.39742	1.55272	0.0244277	0.63395	0.37577	0.0123438		0.620264	0.367658	0.0120773		0.175167	0.63		0.143	1204.8	5.82517
	TA	LH4	#91	46.8849	bdl	31.5507	0.506175	bdl	0.102075	16.867	1.90787	0.0802433	97.927		2.20189	1.74633	0.0198801	0.848739	0.173724	0.00480761		0.826208	0.169112	0.00467999		0.0604881	0.63
	TA	LH4	#92	48.4425	0.0479536	30.5346	0.573981	bdl	0.0818939	15.5558	2.49722	0.123972	97.871		2.2668	1.68396	0.0224615	0.779921	0.226563	0.00740062		0.769241	0.22346	0.00729927		0.0858465	0.63
	TA	LH4	#93	47.7718	bdl	31.763	0.642101	bdl	0.0675386	16.2802	2.18104	0.0679613	98.844		2.21811	1.73816	0.0249328	0.809928	0.196346	0.00402561		0.801671	0.194344	0.00398458		0.0716409	0.63
	TA	LH4	#94	48.9916	bdl	30.7626	0.451842	bdl	0.0882466	15.5175	2.67653	0.094345	98.605		2.27365	1.6826	0.0175366	0.77161	0.240836	0.00558573		0.757943	0.23657	0.00548679		0.0922376	0.63
	TA	LH4	#95	51.1476	0.0491069	29.7959	0.703303	bdl	0.110547	14.4157	3.4688	0.142544	99.854		2.33796	1.60518	0.0268851	0.706026	0.307425	0.0083123		0.690988	0.300877	0.00813525		0.128678	0.63		0.08469	1212.43	4.65229
	TA	LH4	#97	51.4781	0.0448132	29.0013	0.621399	bdl	0.0942141	13.2605	3.72051	0.187161	98.408		2.37846	1.57923	0.0240104	0.656457	0.33329	0.0110318		0.655946	0.333031	0.0110232		0.150038	0.63		0.09091	1209.12	5.21823
	TA	LH4	#98	50.58	0.0632686	29.223	0.622624	bdl	0.101404	13.8632	3.62551	0.162384	98.269		2.34771	1.59862	0.0241684	0.689449	0.326273	0.00961538		0.672412	0.318211	0.00937777		0.139851	0.63		0.08507	1210.68	4.94209
	TA	LH4	#101	51.1544	0.0706817	28.5884	0.619011	bdl	0.0919751	13.6457	3.80003	0.190829	98.161		2.3752	1.56445	0.0240365	0.678869	0.342098	0.0113037		0.657646	0.331403	0.0109503		0.148919	0.63		0.08948	1209.31	5.19038
	TA	LH4	#102	52.1906	0.0449212	28.2684	0.643098	bdl	0.101996	12.6644	4.33944	0.222927	98.509		2.40867	1.5376	0.0248209	0.626241	0.388298	0.0131252		0.609383	0.377845	0.0127719		0.183235	0.63		0.16429	1203.47	6.02583
	TA	LH4	#105	49.6432	0.0412464	30.7709	0.59358	0.0532791	0.109734	14.873	3.03888	0.121598	99.249		2.28657	1.6704	0.0228644	0.733999	0.271385	0.00714512		0.724917	0.268027	0.00705671		0.109263	0.63		0.10437	1215.45	4.17791
	TA	LH4	#106	53.0484	0.0717407	28.3998	0.560363	0.0469444	0.121931	12.5964	4.22171	0.173651	99.266		2.42388	1.52937	0.0214124	0.616677	0.374003	0.0101222		0.616183	0.373703	0.0101141		0.179227	0.63		0.16279	1203.75	5.87163
	TA	LH4	#107	49.8906	0.0486158	30.2211	0.652543	bdl	0.0547209	14.8701	3.12799	0.0992242	99.005		2.30362	1.64459	0.0251975	0.735662	0.28003	0.00584477		0.720153	0.274126	0.00572155		0.112489	0.63		0.10579	1214.79	4.22253
	TA	LH4	#108	51.937	0.0636831	28.6852	0.599748	0.0499011	0.166333	12.9389	4.01985	0.156821	98.621		2.39328	1.55787	0.0231122	0.638831	0.359148	0.00921891		0.634266	0.356581	0.00915302		0.166139	0.63		0.13132	1205.97	5.54905
	TA	LH4	#109	51.6221	0.0527478	29.4953	0.545602	bdl	0.100757	13.4606	3.81066	0.153284	99.286		2.36566	1.59304	0.0209098	0.660931	0.338582	0.00896133		0.655377	0.335737	0.00888603		0.151389	0.63		0.10223	1208.57	5.20069
	TA	LH4	#110	48.9206	0.048748	31.2606	0.667809	bdl	0.0813585	15.7819	2.6666	0.0773842	99.505		2.25335	1.69702	0.0257243	0.778875	0.238145	0.00454723		0.762432	0.233117	0.00445123		0.0903562	0.63
	TA	LH4	#111	49.629	0.0524029	30.5638	0.595901	bdl	0.12465	15.1411	2.9101	0.103728	99.134		2.2893	1.66161	0.0229878	0.748336	0.260268	0.00610409		0.737489	0.256496	0.00601562		0.10278	0.63
	TA	LH4	#112	48.8579	bdl	30.4718	0.665143	bdl	0.0881267	15.6921	2.72046	0.0788791	98.621		2.27088	1.66922	0.0258542	0.781473	0.24516	0.00467715		0.757748	0.237717	0.00453515		0.0927088	0.63
	TA	LH4	#115	53.5076	0.0642767	28.2093	0.588335	bdl	0.108743	12.0588	4.50765	0.187264	99.232		2.44199	1.51732	0.0224548	0.589665	0.398864	0.0109029		0.59	0.399091	0.0109091		0.199896	0.63		0.22866	1200.15	6.35605
	TA	LH4	#116	52.7845	0.0526692	28.2028	0.639534	bdl	0.106301	12.3894	4.50117	0.199637	98.876		2.42363	1.52619	0.0245572	0.609513	0.400711	0.0116939		0.59644	0.392117	0.0114431		0.194283	0.63		0.20639	1201.26	6.24354
	TA	LH4	#117	52.1919	0.0605399	29.0631	0.650023	bdl	0.101186	13.4781	3.98102	0.191863	99.748		2.38208	1.56333	0.0248106	0.659105	0.352285	0.0111713		0.644563	0.344512	0.0109248		0.157952	0.63		0.10567	1207.71	5.40054
	TA	LH4	#118	51.5849	0.0484449	28.5998	0.643546	bdl	0.0902541	13.1984	3.85576	0.149412	98.207		2.38866	1.56081	0.0249211	0.654828	0.34617	0.00882623		0.648458	0.342802	0.00874036		0.156224	0.63		0.11149	1207.69	5.30989
	TA	LH4	#119	52.3873	0.0790405	28.4922	0.738007	bdl	0.125342	12.9263	4.1645	0.206388	99.119		2.40316	1.54041	0.0283121	0.635335	0.370396	0.0120781		0.624218	0.363915	0.0118668		0.172285	0.63		0.13588	1205.28	5.75406
	TA	LH4	#145	46.8086	bdl	31.3407	0.455136	bdl	0.0777068	16.8251	1.99159	0.0691847	97.601		2.20585	1.74066	0.0179369	0.849535	0.181969	0.00415929		0.820281	0.175703	0.00401606		0.0632996	0.63
	TA	LH4	#146	48.1318	bdl	31.5078	0.464766	bdl	0.103164	16.0814	2.27725	0.0679483	98.678		2.23551	1.72472	0.0180524	0.800279	0.20507	0.00402607		0.792846	0.203165	0.00398868		0.075726	0.63
	TA	LH4	#147	47.5304	bdl	31.3194	0.512537	0.0591489	0.106421	16.4745	2.26814	0.0938145	98.415		2.21995	1.72402	0.0200195	0.824439	0.205395	0.00558986		0.796234	0.198368	0.00539862		0.0736234	0.63
	TA	LH4	#148	51.3344	0.0739037	28.0456	0.591602	bdl	0.145429	12.9862	3.98819	0.145976	97.328		2.39861	1.54444	0.0231173	0.65014	0.361305	0.00870144		0.637301	0.354169	0.0085296		0.164229	0.63		0.12939	1206.21	5.49048
	TA	LH4	#149	50.9757	0.0482133	28.7306	0.560411	bdl	0.112278	13.2447	3.87186	0.190245	97.734		2.37439	1.57721	0.0218299	0.661003	0.349668	0.0113048		0.64679	0.342149	0.0110617		0.156328	0.63		0.10188	1208.02	5.36592
	TA	LH4	#150	51.5793	0.0597511	28.8346	0.628118	bdl	0.0847929	13.3235	3.75094	0.154133	98.425		2.38295	1.57003	0.0242682	0.659524	0.335991	0.00908435		0.656504	0.334453	0.00904276		0.150551	0.63		0.1002	1208.75	5.18473
	TA	LH4	#151	52.0166	0.0562892	28.6348	0.594046	bdl	0.134435	13.1143	4.07347	0.183647	98.828		2.39393	1.55317	0.0228636	0.646677	0.36348	0.0107823		0.633414	0.356025	0.0105611		0.166103	0.63		0.12538	1206.19	5.58104
	TA	LH4	#152	48.278	bdl	31.0619	0.423447	bdl	0.123449	15.8124	2.50095	0.0939857	98.32		2.25007	1.7062	0.0165045	0.789616	0.225995	0.00558813		0.773225	0.221303	0.00547213		0.0845798	0.63
	TA	LH4	#153	48.4215	bdl	31.0059	0.410027	bdl	0.106593	15.6712	2.53926	0.065558	98.253		2.25647	1.7029	0.0159793	0.782468	0.229427	0.0038974		0.770303	0.22586	0.00383681		0.0866488	0.63
	TA	LH4	#154	47.3686	bdl	31.4058	0.497786	bdl	0.100529	16.6602	2.02686	0.0804917	98.144		2.21731	1.73261	0.0194865	0.835582	0.183953	0.00480668		0.815726	0.179581	0.00469245		0.0650582	0.63
	TA	LH4	#155	47.5129	bdl	31.6356	0.369203	bdl	0.110088	16.3374	2.14052	0.0763146	98.219		2.21939	1.74163	0.0144226	0.817671	0.193861	0.00454767		0.804731	0.190793	0.0044757		0.0700642	0.63
	TA	LH4	#156	47.7678	bdl	31.3639	0.478816	bdl	0.106323	16.1973	2.17284	0.0784705	98.195		2.23087	1.72634	0.018701	0.810506	0.19675	0.00467525		0.80095	0.19443	0.00462012		0.071737	0.63
	TA	LH4	#157	47.3017	bdl	31.765	0.486479	bdl	0.0897222	16.8865	1.96323	0.0589756	98.585		2.20537	1.74546	0.0189681	0.843562	0.177469	0.0035078		0.823358	0.173218	0.00342379		0.0621713	0.63
	TA	LH4	#158	47.6964	0.0445946	31.7605	0.521433	bdl	0.120006	16.2169	2.27793	0.0766902	98.718		2.21743	1.74024	0.0202731	0.807804	0.20533	0.00454845		0.793768	0.201762	0.00446942		0.0751157	0.63
	TA	LH4	#159	49.4307	bdl	30.6568	0.499064	bdl	0.118374	14.9537	2.7406	0.0878269	98.545		2.29015	1.67397	0.0193365	0.742315	0.246184	0.00519101		0.747029	0.247747	0.00522398		0.0980068	0.63
	TR	LH5-1	#11	58.3166	bdl	24.6107	0.379223	0.0438516	0.0479137	7.99975	6.45439	0.71891	98.62		2.64925	1.31768	0.0144073	0.389386	0.568504	0.0416643		0.38956	0.568757	0.0416829		0.132997	0.42		1.45515	1087.83	7.26453
	TR	LH5-1	#12	58.7698	bdl	24.4827	0.383901	bdl	bdl	7.53921	6.7758	0.820148	98.825		2.66299	1.30746	0.0145476	0.366028	0.595282	0.0474095		0.362864	0.590136	0.0469997		0.148149	0.42		1.65363	1084.91	8.19172
	TR	LH5-1	#13	59.0548	0.0533072	24.3525	0.321928	bdl	bdl	7.53278	6.61197	0.729646	98.678		2.67484	1.29999	0.0121943	0.36557	0.580658	0.0421613		0.369865	0.587479	0.0426565		0.14469	0.42		1.62142	1084.69	7.90063
	TR	LH5-1	#24	59.1518	bdl	23.8016	0.303451	bdl	0.0535555	7.03361	6.9635	0.755462	98.124		2.69339	1.2773	0.0115552	0.343149	0.61476	0.0438836		0.342535	0.61366	0.0438051		0.163197	0.42		1.87644	1080.24	8.85378
	TR	LH5-1	#25	59.2473	bdl	23.8821	0.306838	bdl	bdl	7.2859	6.69683	0.708474	98.146		2.69494	1.28029	0.011672	0.355089	0.590604	0.0411114		0.359837	0.598502	0.0416612		0.151513	0.42		1.7226	1082.58	8.22043
	TR	LH5-1	#26	58.6818	bdl	23.7995	0.417473	bdl	bdl	7.04143	6.89383	0.874406	97.781		2.68485	1.28333	0.0159735	0.345184	0.611539	0.0510373		0.342526	0.60683	0.0506443		0.161385	0.42		1.82402	1082.59	8.95
	TR	LH5-1	#27	60.4519	bdl	23.2716	0.419408	bdl	bdl	6.32708	7.2554	1.08848	98.872		2.72987	1.23855	0.0158389	0.306132	0.635243	0.0627064		0.304888	0.632661	0.0624515		0.189026	0.42
	TR	LH5-1	#28	56.1019	bdl	25.6439	0.328696	bdl	bdl	9.38931	6.06568	0.562005	98.148		2.57447	1.38691	0.0126142	0.461653	0.539679	0.0329009		0.446372	0.521816	0.0318119		0.10649	0.42		1.09666	1094.53	5.54793
	TR	LH5-1	#29	57.7437	bdl	25.1118	0.365512	bdl	bdl	8.38002	6.48453	0.510564	98.619		2.62524	1.34554	0.013897	0.408208	0.571596	0.0296123		0.4044	0.566264	0.0293361		0.127555	0.42		1.42327	1086.47	6.65872
	TR	LH5-1	#30	58.9593	bdl	23.8385	0.347397	bdl	0.0458548	7.12964	6.79433	0.942184	98.132		2.68774	1.28077	0.013244	0.348238	0.600523	0.0547936		0.347005	0.598396	0.0545996		0.157088	0.42		1.74909	1084.71	8.84449
	TR	LH5-1	#41	50.3068	0.066621	28.9957	0.49269	bdl	0.0933748	13.8543	3.73188	0.126572	97.675		2.34965	1.59613	0.0192445	0.693323	0.337949	0.00754177		0.667418	0.325322	0.00725998		0.0444023	0.42
	TR	LH5-1	#42	49.6834	bdl	29.3509	0.633002	bdl	0.0910993	14.2245	3.23493	0.169459	97.427		2.32807	1.62092	0.0248054	0.714162	0.293898	0.01013		0.701403	0.288648	0.00994898		0.0374878	0.42
	TR	LH5-1	#43	53.8595	0.0889205	26.0583	0.729808	bdl	0.0542138	10.7319	5.14009	0.399772	97.086		2.50973	1.43109	0.0284399	0.535814	0.464389	0.0237649		0.523272	0.453519	0.0232086		0.078951	0.42
	TR	LH5-1	#45	59.6604	0.0454789	23.4649	0.289748	bdl	bdl	6.88838	6.88256	0.795517	98.048		2.71451	1.25829	0.0110251	0.335811	0.607158	0.0461757		0.339496	0.613821	0.0466824		0.164701	0.42		1.88528	1080.69	9.00428
	TR	LH5-1	#50	52.4804	0.0707454	27.9226	0.612871	bdl	0.0789068	12.0844	4.29748	0.287599	97.835		2.43226	1.52519	0.0237541	0.600083	0.386166	0.0170043		0.598137	0.384914	0.0169492		0.0586209	0.42
	TR	LH5-1	#61	56.6417	bdl	24.9672	0.310038	bdl	0.0567147	8.68535	6.13698	0.576588	97.412		2.6106	1.35622	0.0119502	0.428908	0.54841	0.0339022		0.424149	0.542325	0.033526		0.116474	0.42		1.24052	1091.26	6.15712
	TR	LH5-1	#62	56.9649	bdl	25.4145	0.309172	bdl	bdl	8.84377	6.08011	0.543433	98.211		2.60343	1.36891	0.0118166	0.433061	0.538761	0.0316842		0.431548	0.536879	0.0315735		0.113328	0.42		1.2007	1091.93	5.93209
	TR	LH5-1	#88	57.6721	0.0531679	25.2147	0.31084	bdl	0.0479052	8.51555	6.31328	0.492623	98.631		2.62097	1.35053	0.0118138	0.41465	0.556286	0.0285608		0.414859	0.556566	0.0285751		0.12221	0.42		1.34628	1088.09	6.35025
	TR	LH5-1	#89	57.8471	bdl	24.534	0.36338	bdl	bdl	7.88582	6.66936	0.5766	97.947		2.64582	1.32252	0.0138994	0.386455	0.591438	0.0336443		0.382047	0.584692	0.0332606		0.139412	0.42		1.58257	1083.75	7.38408
	AB	LH5-2	#2	50.7775	0.0972762	29.5019	0.420646	bdl	0.139697	14.1362	3.54745	0.0904457	98.741		2.34439	1.60533	0.0162417	0.699302	0.317557	0.00532727		0.684124	0.310665	0.00521164		0.336962	0.72		-0.43192	1246.41	9.40343
	AB	LH5-2	#3	51.3825	0.0787373	29.2515	0.337237	bdl	0.153238	13.7269	3.74269	0.0950606	98.775		2.36714	1.58823	0.0129927	0.67757	0.334302	0.00558686		0.665943	0.328566	0.005491		0.366108	0.72		-0.4179	1244.31	9.71757
	AB	LH5-2	#1	51.334	0.0932726	28.7001	0.506716	bdl	0.190133	13.4025	3.91819	0.160586	98.322		2.3773	1.56646	0.0196246	0.665026	0.351813	0.00948737		0.647968	0.342788	0.00924402		0.392551	0.72		-0.41274	1242.91	10.0836
	AB	LH5-2	#3	50.0911	0.118382	28.9537	0.422582	bdl	0.181062	13.8192	3.90809	0.106881	97.601		2.34331	1.59636	0.0165324	0.692669	0.354471	0.00637865		0.657482	0.336464	0.00605462		0.379732	0.72		-0.41022	1243.37	9.8729
	AB	LH5-2	#6	50.5429	0.10431	29.178	0.609834	0.0430084	0.12218	13.9265	3.74759	0.0966474	98.371		2.34479	1.59535	0.0236598	0.692244	0.337087	0.00571995		0.668802	0.325672	0.00552625		0.361332	0.72		-0.42117	1244.67	9.66848
	AB	LH5-2	#8	50.6759	0.0669395	28.9848	0.418113	bdl	0.155743	13.8135	3.8536	0.0811302	98.063		2.35627	1.58836	0.0162582	0.688176	0.347405	0.00481242		0.661458	0.333917	0.00462558		0.374593	0.72		-0.40804	1243.54	9.78474
	AB	LH5-2	#10	51.2514	0.0856963	28.745	0.382043	bdl	0.152279	13.4709	3.94187	0.0966624	98.133		2.37715	1.57134	0.014819	0.669456	0.354487	0.00571962		0.65017	0.344275	0.00555485		0.392917	0.72		-0.39665	1242.3	9.99625
	AB	LH5-2	#11	50.4294	0.0817101	29.0235	0.410896	bdl	0.204268	13.848	3.86595	0.0635071	97.951		2.34875	1.59316	0.0160044	0.691053	0.349105	0.0037734		0.661972	0.334414	0.00361461		0.374859	0.72		-0.40344	1243.37	9.76283
	AB	LH5-2	#13	51.1816	0.0784423	28.9012	0.587953	bdl	0.188474	13.4971	3.933	0.0902996	98.468		2.36764	1.57569	0.0227457	0.668985	0.352754	0.005329		0.651354	0.343457	0.00518856		0.391272	0.72		-0.39658	1242.37	9.97039
	AB	LH5-2	#14	51.1983	0.115491	28.6135	0.415511	bdl	0.137224	13.3466	4.18859	0.0988486	98.114		2.37711	1.56574	0.0161336	0.663951	0.377058	0.00585494		0.634228	0.360179	0.00559284		0.421402	0.72		-0.36727	1240.14	10.2855
	AB	LH5-2	#16	50.6605	0.0710566	29.4966	0.366649	bdl	0.137751	14.2353	3.62867	0.0904077	98.687		2.34178	1.60696	0.0141737	0.705043	0.325214	0.00533138		0.680814	0.314038	0.00514817		0.342277	0.72		-0.42955	1246.02	9.45841
	AB	LH5-2	#17	50.7356	0.092347	28.2125	0.691066	bdl	0.279573	13.604	3.76609	0.095831	97.5		2.37239	1.55479	0.027024	0.681575	0.341437	0.00571661		0.662541	0.331902	0.00555696		0.371724	0.72		-0.41423	1243.9	9.77769
	AB	LH5-2	#19	50.5169	0.0778768	29.1022	0.383583	bdl	0.164662	13.5821	3.7694	0.109328	97.746		2.35438	1.59853	0.0149505	0.678232	0.340611	0.00650021		0.661468	0.332192	0.00633955		0.372652	0.72		-0.41694	1243.95	9.80644
	AB	LH5-2	#20	50.2604	0.0781284	29.4432	0.408247	bdl	0.122018	13.9577	3.77148	0.0877447	98.152		2.3366	1.61324	0.0158722	0.695256	0.339952	0.00520401		0.668251	0.326748	0.00500188		0.362824	0.72		-0.41792	1244.48	9.67137
	AB	LH5-2	#22	50.8632	0.0894886	29.1376	0.385681	bdl	0.144867	13.8422	3.73938	0.0967343	98.319		2.3573	1.59155	0.0149484	0.687367	0.336014	0.00571939		0.66793	0.326513	0.00555766		0.362738	0.72		-0.42041	1244.57	9.68396
	AB	LH5-2	#23	51.1259	0.0895606	28.9038	0.459833	bdl	0.109208	13.5154	3.99864	0.0990123	98.342		2.36838	1.57805	0.0178142	0.670828	0.359144	0.00585138		0.647627	0.346724	0.00564901		0.397266	0.72		-0.39296	1241.99	10.043
	AB	LH5-2	#24	52.1875	0.0856963	27.8747	0.405502	bdl	0.129719	12.5476	4.52151	0.142797	97.895		2.42165	1.52444	0.015736	0.623848	0.406795	0.00845322		0.600375	0.391489	0.00813517		0.483861	0.72		-0.43265	1246.23	9.45016
	AB	LH5-2	#26	50.477	0.0707285	29.2725	0.455358	bdl	0.137115	14.1591	3.5888	0.0987698	98.276		2.34341	1.60166	0.0176793	0.704311	0.323037	0.00584976		0.681681	0.312657	0.0056618		0.340338	0.72
	AB	LH5-2	#27	50.5826	0.0858407	29.3437	0.406185	bdl	0.167601	14.2666	3.5706	0.0836218	98.528		2.3424	1.60151	0.0157304	0.707867	0.320588	0.00494012		0.684992	0.310228	0.00478048		0.336061	0.72		-0.43031	1246.42	9.3835
	AB	LH5-2	#31	52.4021	0.10887	28.3901	0.641562	bdl	0.117442	12.5161	4.36933	0.161587	98.714		2.41074	1.53931	0.0246829	0.616944	0.389731	0.00948344		0.607134	0.383534	0.00933265		0.468751	0.72
	AB	LH5-2	#35	50.9063	0.0932346	28.8788	0.509864	bdl	0.180646	13.7426	3.92672	0.109946	98.368		2.3603	1.57808	0.0197699	0.682713	0.352998	0.00650327		0.655061	0.3387	0.00623986		0.383669	0.72		-0.40776	1243.11	9.91809
	AB	LH5-2	#37	51.0521	0.108265	28.8589	0.39287	bdl	0.152579	14.0322	3.79032	0.0792435	98.483		2.36371	1.57476	0.015212	0.69611	0.340254	0.00468061		0.668665	0.326839	0.00449607		0.362701	0.72		-0.41578	1244.41	9.65781
	AB	LH5-2	#38	50.8278	0.0785121	29.3277	0.403526	bdl	0.169778	14.0787	3.63625	0.0969931	98.637		2.34943	1.5977	0.0155987	0.697263	0.325883	0.00571953		0.677701	0.31674	0.00555907		0.346808	0.72		-0.42935	1245.75	9.51632
	AB	LH5-2	#39	50.1098	0.0812327	28.9647	0.468275	bdl	0.154635	14.117	3.48524	0.106678	97.518		2.34466	1.59728	0.0183237	0.707738	0.316182	0.00636782		0.686932	0.306887	0.00618063		0.331503	0.72		-0.43809	1246.95	9.36835
	AB	LH5-2	#40	50.4883	0.0885507	28.4389	0.680312	bdl	0.0800516	13.363	4.02798	0.178388	97.352		2.36613	1.57079	0.0266632	0.671002	0.366001	0.0106653		0.640472	0.349348	0.01018		0.404745	0.72		-0.40472	1242.14	10.2316
	AB	LH5-2	#72	52.6496	0.108618	27.6477	0.569328	bdl	0.179534	12.5528	4.60622	0.154587	98.472		2.42989	1.50386	0.0219741	0.620736	0.412177	0.0091017		0.595708	0.395558	0.00873471		0.49272	0.72
	AB	LH5-2	#4	51.7507	0.0820598	28.774	0.462978	bdl	0.152445	12.81	3.94906	0.0967679	98.078		2.39425	1.56895	0.0179131	0.635005	0.354237	0.00571141		0.638226	0.356034	0.00574038		0.413943	0.72		-0.37624	1240.73	10.2143
	AB	LH5-2	#80	50.4914	0.0817154	29.4308	0.467717	bdl	0.134938	13.5933	3.59529	0.0963618	97.928		2.34734	1.61256	0.0181843	0.677106	0.324071	0.00571507		0.672472	0.321852	0.00567595		0.355145	0.72		-0.42552	1245.15	9.60715
	AB	LH5-2	#92	51.6919	0.0822609	28.9734	0.417029	bdl	0.194325	12.9727	3.88621	0.121256	98.339		2.38644	1.57646	0.0161009	0.641698	0.347857	0.00714152		0.643825	0.34901	0.00716519		0.402247	0.72		-0.39452	1241.85	10.1313
	AB	LH5-2	#94	51.5077	0.0823801	29.3237	0.293017	bdl	0.151151	13.5409	3.55917	0.128056	98.586		2.37345	1.59251	0.0112916	0.668543	0.317983	0.00752776		0.672542	0.319885	0.00757279		0.352938	0.72		-0.43511	1245.59	9.62978
	AB	LH5-2	#100	50.8057	0.0891417	29.1005	0.387526	bdl	0.153675	13.6138	3.63843	0.0700794	97.873		2.36194	1.59445	0.0150665	0.678124	0.327957	0.00415628		0.671252	0.324634	0.00411417		0.358865	0.72		-0.41647	1244.64	9.60841
	AB	LH5-2	#106	51.0805	0.0709016	29.4585	0.453116	bdl	0.131802	13.586	3.43255	0.112213	98.35		2.36079	1.60461	0.0175133	0.672769	0.307585	0.00661613		0.681651	0.311646	0.00670347		0.339252	0.72		-0.43773	1246.46	9.46362
	AB	LH5-2	#111	52.3391	0.104607	28.2262	0.440195	bdl	0.207355	12.5105	4.20611	0.103531	98.141		2.41822	1.53702	0.0170087	0.619325	0.376788	0.00610236		0.617956	0.375955	0.00608887		0.451442	0.72
	AB	LH5-2	#115	52.4338	0.0966101	27.8058	0.571504	bdl	0.178112	11.9395	4.36936	0.140217	97.535		2.43496	1.52185	0.022195	0.594073	0.39341	0.0083069		0.596585	0.395073	0.00834202		0.491392	0.72
	AB	LH5-2	#140	52.6557	0.0901131	28.5861	0.621395	bdl	0.0757805	12.0673	4.32629	0.148328	98.595		2.41924	1.5479	0.0238758	0.594039	0.385386	0.00869389		0.601182	0.39002	0.00879842		0.481398	0.72
	AB	LH5-2	#141	50.7724	0.0747333	29.5576	0.423475	bdl	0.186655	13.7406	3.65895	0.063893	98.489		2.34727	1.6105	0.0163727	0.680635	0.327973	0.00376831		0.672314	0.323964	0.00372224		0.357559	0.72		-0.41551	1244.68	9.58523
	AB	LH5-2	#142	50.5924	0.0741074	29.3928	0.55324	bdl	0.125264	13.1885	3.56218	0.122346	97.618		2.35574	1.61302	0.0215432	0.657977	0.321591	0.0072676		0.666754	0.325881	0.00736454		0.362674	0.72		-0.42836	1244.84	9.72721
	TA	LH13	#15	53.4668	bdl	27.5041	0.461844	bdl	0.0586252	11.7721	4.66755	0.351374	98.312		2.46351	1.49356	0.017796	0.581162	0.416971	0.0206537		0.570445	0.409282	0.0202729		0.137364	0.54		0.74437	1162.2	5.41544
	TA	LH13	#16	55.4839	0.0416269	26.4248	0.517366	bdl	0.0515544	10.9136	5.24122	0.307915	98.982		2.53001	1.42011	0.0197292	0.533208	0.463377	0.017912		0.525589	0.456755	0.0176561		0.16638	0.54		0.93924	1154.52	6.27108
	TA	LH13	#17	54.5473	bdl	26.891	0.502309	bdl	bdl	11.7062	4.95977	0.244737	98.908		2.49566	1.45002	0.0192194	0.573854	0.439968	0.0142847		0.558166	0.42794	0.0138942		0.146785	0.54		0.82532	1158.67	5.56662
	TA	LH13	#18	54.9417	bdl	26.3719	0.462417	bdl	0.0435501	10.8699	5.10428	0.336322	98.16		2.52599	1.42898	0.0177795	0.535462	0.455	0.0197262		0.530062	0.450411	0.0195272		0.162685	0.54		0.90681	1155.78	6.2023
	TA	LH13	#19	53.4235	bdl	27.3358	0.605195	bdl	0.0528115	11.7881	4.60153	0.231425	98.092		2.46581	1.48701	0.0233603	0.58297	0.41179	0.0136269		0.578121	0.408366	0.0135135		0.135236	0.54		0.75896	1161.57	5.18734
	TA	LH13	#22	55.4941	0.0414686	26.1391	0.556088	bdl	0.0494562	10.2925	5.51818	0.404547	98.499		2.54164	1.41095	0.0212994	0.505081	0.490016	0.0236371		0.495793	0.481005	0.0232024		0.185743	0.54		1.05589	1151.13	6.9971
	TA	LH13	#23	54.0033	bdl	27.1031	0.516438	bdl	0.0624867	11.7107	4.67203	0.311992	98.417		2.48305	1.46873	0.0198582	0.576926	0.416503	0.0183007		0.570237	0.411674	0.0180885		0.138217	0.54		0.75779	1161.6	5.39142
	TA	LH13	#37	51.0592	0.0407201	28.3252	0.695883	bdl	0.0784488	13.3864	3.84457	0.226997	97.668		2.38216	1.55749	0.0271512	0.669167	0.34777	0.0135107		0.649395	0.337494	0.0131114		0.0994994	0.54
	TA	LH13	#38	52.7879	0.0628476	26.7516	0.488799	bdl	0.0559605	11.9698	4.64551	0.309527	97.085		2.46669	1.47328	0.0191015	0.599292	0.420882	0.0184517		0.577005	0.40523	0.0177655		0.134458	0.54		0.73785	1162.5	5.26194
	TA	LH13	#39	52.4838	0.0481739	27.1556	0.653278	bdl	0.0448746	12.1178	4.56596	0.336481	97.434		2.44691	1.49214	0.0254711	0.605328	0.412736	0.020013		0.583125	0.397596	0.0192789		0.13054	0.54		0.71069	1163.76	5.16974
	TA	LH13	#44	51.3084	0.0408031	28.1486	0.510465	bdl	0.0917103	13.6298	3.91285	0.179344	97.822		2.3902	1.54546	0.0198869	0.680315	0.353415	0.0106583		0.6514	0.338395	0.0102054		0.0994578	0.54
	TA	LH13	#45	49.7664	0.0478366	28.9594	0.546103	bdl	0.126254	14.3192	3.34481	0.18008	97.29		2.33681	1.60263	0.0214446	0.720408	0.304513	0.0107873		0.69557	0.294014	0.0104154		0.0809265	0.54
	TA	LH13	#46	52.5281	bdl	27.1092	0.643411	0.0888721	0.0991185	12.4846	4.25486	0.297213	97.56		2.44577	1.48764	0.0250535	0.622834	0.384111	0.0176543		0.60788	0.374889	0.0172305		0.118072	0.54		0.65866	1166.64	4.71162
	TA	LH13	#47	51.5451	bdl	28.4655	0.550317	bdl	0.118593	13.5774	3.88763	0.169378	98.369		2.3866	1.55334	0.0213089	0.673569	0.348998	0.0100048		0.652322	0.337989	0.00968919		0.0991984	0.54
	TA	LH13	#48	51.0122	0.066568	28.2952	0.585435	bdl	0.119425	13.7758	3.55961	0.213693	97.635		2.38077	1.55637	0.0228495	0.688862	0.322101	0.012723		0.672923	0.314648	0.0124287		0.0895206	0.54
	TA	LH13	#83	51.2233	0.0408065	28.2906	0.704032	bdl	0.10482	13.4773	3.82538	0.212168	97.889		2.38445	1.5521	0.0274075	0.672198	0.345256	0.0125997		0.652585	0.335183	0.012232		0.098335	0.54
	TA	LH13	#84	53.0619	0.0408127	26.6586	0.670767	bdl	0.0842434	11.8827	4.74142	0.315018	97.466		2.47054	1.46286	0.0261179	0.592785	0.428022	0.0187113		0.57025	0.41175	0.018		0.138239	0.54		0.75827	1161.58	5.39005
	TA	LH13	#93	56.0148	bdl	25.6797	0.450852	bdl	0.0760658	9.99072	5.67752	0.442214	98.347		2.56625	1.38657	0.0172737	0.490417	0.504314	0.0258456		0.480529	0.494146	0.0253245		0.196879	0.54		1.13002	1149.13	7.38123
	TA	LH13	#94	56.3949	bdl	25.5291	0.407605	bdl	0.0400152	9.74312	5.89116	0.378533	98.439		2.5786	1.37574	0.0155862	0.477327	0.522267	0.0220804		0.467201	0.511187	0.021612		0.209479	0.54		1.2385	1145.6	7.65181
	TA	LH13	#95	53.541	bdl	27.4046	0.502491	bdl	bdl	12.2373	4.43807	0.267501	98.455		2.46391	1.48634	0.0193386	0.603389	0.395986	0.0157045		0.594425	0.390104	0.0154712		0.125645	0.54		0.70081	1164.39	4.92059
	TA	LH13	#105	54.9327	0.0451151	26.2957	0.557953	bdl	0.0569092	10.8636	5.2085	0.456645	98.424		2.52283	1.4233	0.0214294	0.534567	0.463785	0.0267543		0.521475	0.452426	0.0260991		0.166103	0.54		0.90525	1156.25	6.46963
	TA	LH13	#118	53.1656	0.0449576	26.8973	0.593073	bdl	0.064272	11.7567	5.42288	0.424125	98.369		2.45975	1.46665	0.0229469	0.5828	0.486449	0.025033		0.532587	0.444537	0.0228762		0.159802	0.54		0.87461	1157.12	6.1939
	TA	LH13	#163	54.9987	0.0596363	26.1172	0.529689	bdl	0.0470166	9.82293	5.2982	0.417556	97.291		2.54446	1.42405	0.0204937	0.48692	0.475246	0.0246443		0.493428	0.481598	0.0249737		0.186864	0.54
	TA	LH13	#164	54.1792	0.0635863	26.9539	0.487816	bdl	0.0849275	10.485	5.13399	0.383738	97.79		2.50077	1.46628	0.0188301	0.518542	0.459454	0.0225961		0.518235	0.459182	0.0225827		0.169638	0.54
	TA	LH13	#165	54.1101	0.077998	26.5352	0.711569	bdl	0.0974514	10.323	4.94675	0.354772	97.171		2.51113	1.45134	0.0276162	0.513298	0.4451	0.0210038		0.524093	0.454461	0.0214456		0.166017	0.54		0.92226	1155.35	6.35263
	TA	LH13	#166	53.3636	0.0482865	27.0958	0.67485	bdl	0.0730916	10.8476	4.85041	0.332887	97.29		2.47917	1.48361	0.0262195	0.539966	0.436905	0.0197295		0.541808	0.438395	0.0197968		0.154912	0.54		0.85404	1157.73	5.96543
	TA	LH13	#167	52.9797	0.0556026	27.1475	0.606804	bdl	0.0804254	11.2446	4.73995	0.3344	97.189		2.46742	1.49011	0.0236341	0.561114	0.42801	0.0198682		0.556113	0.424196	0.0196911		0.146038	0.54		0.79816	1159.91	5.68106
	TA	LH13	#179	54.4064	0.0594547	26.4077	0.518049	bdl	0.0412486	10.0095	5.19125	0.407521	97.055		2.52565	1.4448	0.0201117	0.497863	0.467241	0.0241341		0.503279	0.472324	0.0243966		0.179678	0.54		1.00741	1152.76	6.84428
	TA	LH13	#186	54.0517	0.0633051	26.8679	0.653127	0.0462979	0.0826729	10.47	4.82235	0.399606	97.457		2.50172	1.46561	0.0252804	0.51922	0.432748	0.023595		0.532226	0.443588	0.024186		0.159569	0.54		0.86808	1157.43	6.21851
	TA	LH13	#189	54.1993	0.0558393	26.6644	0.415187	bdl	0.0638629	10.3543	5.11829	0.403866	97.275		2.51285	1.457	0.016098	0.514358	0.460092	0.0238874		0.515215	0.460858	0.0239272		0.171255	0.54		0.94928	1154.61	6.57541
	TA	LH15	#1	47.603	bdl	30.5434	0.534631	bdl	0.0814591	16.3722	2.3288	0.0519216	97.559		2.24158	1.69509	0.0210538	0.826038	0.212618	0.00311909		0.792914	0.204092	0.00299401		0.123382	0.78		0.48557	1261.12	7.82671
	TA	LH15	#2	49.4258	bdl	29.5694	0.508435	bdl	0.0838888	15.2175	2.93121	0.102386	97.875		2.31027	1.62894	0.0198746	0.762121	0.265645	0.00610528		0.737153	0.256942	0.00590526		0.167081	0.78		0.36611	1257.69	8.65777
	TA	LH15	#3	48.4697	bdl	30.3554	0.491452	bdl	0.0782377	16.1366	2.36756	0.100132	98.066		2.26655	1.67297	0.0192191	0.808499	0.214656	0.00597349		0.785615	0.20858	0.00580442		0.127267	0.78		0.45696	1261.13	7.95511
	TA	LH15	#4	48.2879	bdl	30.1973	0.571298	bdl	0.0852161	15.947	2.31034	0.0865912	97.515		2.26931	1.67255	0.022453	0.802985	0.210513	0.00519143		0.788253	0.206651	0.00509619		0.125667	0.78		0.46619	1261.17	7.91195
	TA	LH15	#5	47.2801	bdl	31.1355	0.636984	bdl	0.100501	17.0516	2.00768	0.0478462	98.275		2.21425	1.71854	0.0249478	0.855632	0.182301	0.0028586		0.822097	0.175156	0.00274657		0.10213	0.78		0.58026	1262.42	7.46725
	TA	LH15	#10	47.6485	bdl	30.6139	0.6812	bdl	0.0853322	16.4695	2.22363	0.104051	97.844		2.23841	1.69498	0.0267622	0.828977	0.202535	0.00623584		0.798823	0.195168	0.00600901		0.117114	0.78		0.49333	1261.86	7.78545
	TA	LH15	#13	47.2206	bdl	30.8677	1.04962	bdl	0.0965885	16.7365	2.10657	0.0586051	98.204		2.21464	1.70621	0.0411682	0.841025	0.191555	0.00350644		0.811732	0.184883	0.00338431		0.109178	0.78		0.54212	1262.09	7.59567
	TA	LH15	#28	50.1689	0.0558225	29.3284	0.505439	0.046269	0.12581	15.0617	3.13733	0.0943534	98.524		2.32816	1.60407	0.0196156	0.748902	0.282283	0.00558591		0.722341	0.272272	0.0053878		0.18068	0.78		0.35476	1256.26	8.8855
	TA	LH15	#29	50.5647	0.0485877	29.593	0.524422	bdl	0.103721	14.6936	3.16243	0.13663	98.827		2.33518	1.61071	0.020254	0.727066	0.283166	0.00804966		0.714012	0.278082	0.00790514		0.186689	0.78		0.33951	1255.96	9.04841
	TA	LH15	#30	49.4552	bdl	30.2106	0.561963	bdl	0.114466	15.3988	2.67496	0.0942897	98.573		2.29447	1.6519	0.0218038	0.765471	0.240621	0.00558075		0.756639	0.237845	0.00551636		0.15068	0.78		0.39538	1259.18	8.35922
	TA	LH15	#31	49.5763	0.0594712	30.0659	0.568342	bdl	0.105026	15.1738	2.81193	0.0942381	98.455		2.30175	1.64519	0.0220674	0.754833	0.253126	0.00558174		0.744749	0.249744	0.00550717		0.160744	0.78		0.37712	1258.25	8.53685
	TA	LH15	#32	47.7902	bdl	31.1551	0.582711	bdl	0.100869	16.5969	2.13424	0.0916773	98.485		2.22928	1.71282	0.0227319	0.829519	0.193026	0.00545565		0.806924	0.187769	0.00530705		0.111543	0.78		0.5207	1262.14	7.67648
	TA	LH15	#33	47.9877	bdl	30.5859	0.510974	bdl	0.128432	16.3285	2.36713	0.0978787	98.057		2.24765	1.6884	0.0200149	0.819443	0.214966	0.00584852		0.787731	0.206647	0.00562219		0.125748	0.78		0.46311	1261.22	7.92486
	TA	LH15	#34	48.0141	bdl	30.416	0.49939	bdl	0.109462	16.2289	2.33661	0.0672081	97.701		2.25511	1.68367	0.0196153	0.816699	0.212781	0.00402699		0.790221	0.205882	0.00389643		0.124888	0.78		0.47531	1261.1	7.87229
	TA	LH15	#74	50.4874	0.0559552	29.4648	0.667692	bdl	0.126109	14.613	3.14334	0.109974	98.686		2.33509	1.60613	0.0258257	0.724158	0.281877	0.00648887		0.715201	0.27839	0.00640861		0.186585	0.78		0.34637	1255.78	9.0123
	TA	LH15	#76	47.1377	bdl	30.9915	0.712484	bdl	0.0740165	16.7578	1.9193	0.0648694	97.709		2.2183	1.7189	0.0280403	0.844975	0.175122	0.00389449		0.825177	0.171019	0.00380325		0.0993455	0.78		0.58885	1262.66	7.44563
	TA	LH15	#80	48.7596	bdl	30.8672	0.556113	bdl	0.0939664	16.1228	2.34955	0.105413	98.926		2.25943	1.68575	0.0215506	0.800487	0.211092	0.00623149		0.78648	0.207398	0.00612245		0.126406	0.78		0.4582	1261.22	7.94719
	TA	LH15	#81	48.993	0.0483601	30.4823	0.521965	bdl	0.101358	15.6093	2.74496	0.0987022	98.659		2.27513	1.66831	0.0202708	0.776656	0.247147	0.00584734		0.754291	0.24003	0.00567895		0.152538	0.78		0.39083	1259.03	8.39567
	TA	LH15	#82	50.5684	bdl	29.1468	0.535676	bdl	0.110811	14.5997	3.28961	0.109736	98.412		2.34555	1.59335	0.0207789	0.725573	0.295839	0.0064934		0.705875	0.287808	0.00631712		0.195446	0.78		0.34362	1254.83	9.1648
	TA	LH15	#91	47.3258	bdl	30.9782	0.531721	bdl	0.109309	16.6755	1.97438	0.0822695	97.719		2.22529	1.71673	0.0209088	0.840116	0.179997	0.00493498		0.819587	0.175599	0.00481439		0.102701	0.78		0.56548	1262.59	7.52087
	TA	LH15	#92	47.9629	bdl	30.3769	0.65154	bdl	0.0927668	16.312	2.28817	0.0607058	97.792		2.25199	1.68097	0.0255834	0.820616	0.208303	0.00363622		0.794743	0.201736	0.00352157		0.121677	0.78		0.48905	1261.29	7.809
	TA	LH15	#100	48.5272	bdl	30.6446	0.699681	bdl	0.104669	15.8685	2.41866	0.0873652	98.384		2.26081	1.68263	0.0272606	0.792114	0.218474	0.00519249		0.779808	0.21508	0.00511182		0.132209	0.78		0.44467	1260.68	8.02578
	TA	LH15	#110	46.627	bdl	31.6532	0.605095	bdl	0.0760508	17.2114	1.72999	0.0606915	98.014		2.19019	1.75233	0.0237697	0.86623	0.157555	0.0036369		0.84311	0.15335	0.00353982		0.0871868	0.78		0.66195	1263.15	7.2555
	TA	LH15	#111	46.9705	bdl	31.7909	0.559159	bdl	0.089622	17.5976	1.62367	0.04	98.696		2.19149	1.74813	0.0218175	0.879712	0.146878	0.00233759		0.854979	0.142749	0.00227187		0.0800328	0.78		0.71805	1263.26	7.12913
	TA	LH15	#117	48.3902	bdl	30.6485	0.569244	bdl	0.100842	16.1561	2.32465	0.109111	98.332		2.25713	1.68486	0.0222051	0.807434	0.210234	0.00649272		0.788386	0.205275	0.00633955		0.124809	0.78		0.46258	1261.36	7.92437
	TA	LH15	#120	48.8596	bdl	29.7387	0.658834	bdl	0.137436	15.4295	2.69894	0.0781309	97.645		2.29137	1.64371	0.0258391	0.775304	0.245407	0.00467441		0.75611	0.239331	0.00455869		0.151728	0.78		0.39798	1258.97	8.35638
	TA	LH15	#121	49.0538	0.0442231	29.4756	0.540293	bdl	0.143179	15.3911	2.94808	0.0912617	97.705		2.30027	1.62901	0.0211881	0.7733	0.268036	0.00545951		0.738731	0.256054	0.00521545		0.166148	0.78		0.37063	1257.7	8.62574
	TA	LH15	#122	49.7697	bdl	29.0525	0.494693	bdl	0.108025	14.5766	3.44408	0.141469	97.62		2.33144	1.60398	0.0193799	0.731624	0.31281	0.00845432		0.694873	0.297097	0.00802965		0.204948	0.78		0.33564	1254.03	9.36918
	TA	LH15	#123	47.1901	bdl	31.406	0.50672	bdl	0.0706004	16.9033	1.85136	0.0607899	98.029		2.21231	1.73526	0.0198664	0.849062	0.16828	0.00363568		0.831616	0.164823	0.00356098		0.0950045	0.78		0.61437	1262.84	7.37274
	TA	LH15	#124	46.7222	bdl	30.929	0.561047	bdl	0.106753	16.8914	1.88502	0.0494685	97.17		2.21197	1.72574	0.0222132	0.856832	0.173029	0.00298774		0.829581	0.167526	0.00289272		0.0967998	0.78		0.60812	1262.7	7.38622
	TA	LH15	#127	49.984	0.0591366	29.0051	0.598387	0.0557993	0.115624	14.7666	3.15458	0.106783	97.846		2.33467	1.5967	0.023374	0.739007	0.285682	0.00636291		0.716751	0.277078	0.00617128		0.185304	0.78		0.34814	1255.88	8.98444
	TR	LH6-1	#205	57.2044	bdl	24.029	0.456937	bdl	bdl	8.50709	6.36921	0.453714	97.087		2.64317	1.30854	0.0176566	0.421162	0.570594	0.0267446		0.413512	0.560229	0.0262588		0.0833004	0.38		1.14787	1062.68	4.75114
	TR	LH6-1	#206	59.78	bdl	22.7257	0.318846	bdl	bdl	6.69553	7.27287	0.624823	97.474		2.73531	1.22553	0.0122008	0.328252	0.645213	0.0364725		0.325022	0.638864	0.0361136		0.120855	0.38		1.87657	1050.41	7.75798
	TR	LH6-1	#207	60.1353	bdl	22.6934	0.265153	bdl	bdl	6.64914	7.1832	0.690813	97.662		2.74409	1.22046	0.0101186	0.325093	0.635527	0.040215		0.324822	0.634997	0.0401815		0.120198	0.38		1.84661	1051.77	7.81968
	TR	LH6-1	#210	57.4471	0.0412988	24.3475	0.314052	bdl	bdl	8.15231	6.61131	0.460446	97.425		2.64272	1.32006	0.012082	0.401825	0.589682	0.0270222		0.394515	0.578954	0.0265306		0.0902297	0.38		1.29615	1059.47	5.30202
	TR	LH6-1	#221	57.9723	bdl	24.1163	0.444605	bdl	bdl	8.15634	6.72663	0.485017	97.964		2.65329	1.30086	0.0170174	0.399974	0.596908	0.028319		0.390142	0.582235	0.0276229		0.0917582	0.38		1.32427	1059.05	5.44646
	TR	LH6-1	#222	58.7777	bdl	23.8283	0.46593	bdl	bdl	7.69806	6.69214	0.537298	98.045		2.68068	1.2808	0.0177709	0.376171	0.591757	0.0312611		0.376477	0.592237	0.0312865		0.0967223	0.38		1.41402	1057.83	5.91397
	TR	LH6-1	#223	58.5891	0.0487451	23.2131	0.404709	bdl	0.0510825	7.49431	6.7934	0.581453	97.183		2.6958	1.25881	0.0155729	0.369467	0.606046	0.0341306		0.365938	0.600257	0.0338046		0.100855	0.38		1.48954	1056.81	6.28485
	TR	LH6-1	#227	58.3298	0.0415211	23.9341	0.383644	bdl	bdl	7.85436	6.82409	0.474053	97.874		2.66807	1.29027	0.0146754	0.384938	0.6052	0.0276626		0.378206	0.594615	0.0271788		0.0966667	0.38		1.42994	1056.81	5.8079
	TR	LH6-1	#228	58.2607	bdl	24.2664	0.470807	bdl	bdl	8.29744	6.66756	0.476366	98.504		2.65173	1.30171	0.0179206	0.404642	0.588394	0.0276601		0.396438	0.576463	0.0270992		0.0894058	0.38		1.27617	1059.98	5.2521
	TR	LH6-1	#229	57.925	bdl	24.3321	0.410772	bdl	bdl	8.283	6.54388	0.449536	97.986		2.64877	1.31134	0.0157085	0.405826	0.580178	0.0262242		0.400923	0.573169	0.0259074		0.0879003	0.38		1.24873	1060.39	5.10591
	TR	LH6-1	#236	58.9492	bdl	23.7329	0.319509	bdl	bdl	7.43637	6.79831	0.563732	97.857		2.69084	1.27678	0.0121969	0.363701	0.601671	0.0328278		0.364357	0.602756	0.032887		0.101715	0.38		1.51108	1056.23	6.32514
	TR	LH6-1	#237	58.8762	bdl	23.4925	0.32595	bdl	bdl	7.57399	6.92415	0.518601	97.79		2.69205	1.26598	0.0124638	0.371057	0.613842	0.0302507		0.36552	0.604681	0.0297992		0.101715	0.38		1.524	1055.42	6.24764
	TR	LH6-1	#238	58.9093	bdl	23.6174	0.316308	bdl	bdl	7.64808	6.91113	0.517264	97.965		2.689	1.27056	0.0120746	0.374053	0.611649	0.0301216		0.368226	0.602122	0.0296524		0.10054	0.38		1.50035	1055.85	6.15753
	TR	LH6-1	#239	59.2267	bdl	23.3933	0.313201	bdl	bdl	7.28861	7.14231	0.566848	97.976		2.70191	1.25776	0.011949	0.356263	0.63174	0.0329897		0.348938	0.618751	0.0323114		0.109028	0.38		1.662	1053.33	6.83936
	TR	LH6-1	#240	57.5619	bdl	24.0584	0.334258	bdl	bdl	8.08773	6.82139	0.489144	97.4		2.65054	1.30564	0.0128718	0.399025	0.609004	0.028734		0.384876	0.587409	0.0277151		0.0938403	0.38		1.36811	1058.16	5.60776
	TR	LH6-1	#241	57.517	bdl	24.1452	0.401236	bdl	bdl	8.29773	6.46884	0.45311	97.337		2.64827	1.31025	0.0154498	0.409354	0.577484	0.0266152		0.40392	0.569818	0.0262618		0.0867381	0.38		1.22224	1061.02	5.02348
	TR	LH6-1	#256	57.6438	bdl	24.4453	0.429575	bdl	bdl	8.31627	6.28521	0.463424	97.668		2.64323	1.3211	0.0164732	0.408587	0.558791	0.0271094		0.410852	0.561889	0.0272597		0.0840881	0.38		1.16087	1062.53	4.83803
	TR	LH6-1	#257	57.8992	bdl	24.2818	0.38659	bdl	bdl	8.15493	6.60262	0.47128	97.847		2.651	1.31031	0.0148028	0.400065	0.586139	0.027528		0.394646	0.578199	0.0271551		0.0900822	0.38		1.29042	1059.69	5.30587
	TR	LH6-1	#263	58.4476	bdl	24.7401	0.407089	bdl	bdl	8.02627	6.48205	0.533724	98.675		2.65032	1.32218	0.0154375	0.389959	0.56989	0.030875		0.39361	0.575226	0.0311641		0.0898548	0.38		1.26911	1060.77	5.38629
	TR	LH6-1	#264	60.5547	bdl	22.9033	0.317448	bdl	bdl	6.45545	7.04353	0.698139	98.029		2.74831	1.2251	0.0120489	0.313919	0.619805	0.040422		0.32225	0.636255	0.0414949		0.121397	0.38		1.86375	1051.78	7.93556
	TR	LH6-1	#265	58.8512	bdl	24.6057	0.382119	bdl	bdl	8.28386	6.65811	0.482934	99.325		2.65379	1.30768	0.0144101	0.400237	0.582116	0.0277816		0.396222	0.576276	0.0275029		0.0894255	0.38		1.27493	1060.07	5.26347
	TR	LH6-1	#269	57.7489	bdl	24.2188	0.321196	bdl	0.0455203	8.34697	6.37874	0.483171	97.597		2.65064	1.31014	0.0123292	0.410496	0.56766	0.0282922		0.407866	0.564023	0.0281109		0.0850254	0.38		1.1777	1062.28	4.93306
	TR	LH6-1	#278	61.2421	0.068291	21.9862	0.542577	bdl	bdl	5.41483	7.43449	1.31087	98.027		2.78347	1.17772	0.0206231	0.26369	0.655139	0.076007		0.265059	0.65854	0.0764016		0.15276	0.38
	TR	LH6-1	#280	61.6815	0.053305	21.9919	0.541091	bdl	0.0422653	5.45556	7.34288	1.21902	98.341		2.79067	1.17266	0.020473	0.264464	0.644121	0.0703596		0.270152	0.657975	0.0718729		0.149751	0.38
	TR	LH6-1	#281	61.1278	0.0454233	21.9166	0.571979	bdl	0.0630278	5.55392	7.26036	1.30787	97.847		2.78321	1.17608	0.0217793	0.270945	0.640933	0.0759682		0.274278	0.648819	0.0769029		0.145446	0.38
	TR	LH6-1	#282	61.624	0.0535038	21.9202	0.52936	bdl	0.0655627	5.39005	7.79134	1.32497	98.733		2.78434	1.16728	0.0200023	0.260939	0.682545	0.0763723		0.255858	0.669256	0.0748854		0.160828	0.38
	TR	LH6-1	#23	57.8129	0.0601695	24.1379	0.480306	0.0601136	bdl	8.16833	6.47334	0.490027	97.683		2.65185	1.30491	0.0184247	0.40145	0.575706	0.028675		0.399123	0.572368	0.0285088		0.0881736	0.38		1.24394	1060.89	5.1905
	TA	LH17	#200	49.1618	0.0514455	29.3206	0.585014	bdl	0.103831	15.2463	2.80276	0.153833	97.429		2.3097	1.62352	0.0229853	0.767476	0.255306	0.00922011		0.743677	0.247389	0.00893419		0.111715	0.65		0.04204	1228.95	5.23201
	TA	LH17	#201	49.111	0.0514793	29.605	0.585398	bdl	0.129874	14.9955	2.81886	0.104068	97.408		2.30515	1.63773	0.0229788	0.754146	0.256532	0.00623154		0.741606	0.252266	0.00612792		0.114235	0.65		0.04997	1228.3	5.22358
	TA	LH17	#202	50.7127	0.0593452	28.918	0.577145	bdl	0.117904	13.7641	3.56718	0.170581	97.887		2.36076	1.58657	0.0224686	0.686527	0.321964	0.0101304		0.673977	0.316078	0.00994517		0.157494	0.65		0.00797	1222.52	6.24124
	TA	LH17	#203	48.9502	bdl	29.5061	0.47891	bdl	0.081524	15.3541	2.77656	0.116917	97.351		2.30191	1.63532	0.0188341	0.773626	0.253156	0.00701407		0.748335	0.24488	0.00678477		0.109893	0.65		0.0574	1228.93	5.14662
	TA	LH17	#204	51.1018	0.0665325	28.3533	0.555202	bdl	0.0857906	13.701	3.50035	0.159094	97.523		2.38477	1.55944	0.0216679	0.685069	0.316715	0.0094716		0.677444	0.31319	0.00936618		0.155256	0.65		0.00874	1222.78	6.17964
	TA	LH17	#205	49.7304	bdl	29.1681	0.640521	bdl	0.0800557	14.9722	2.98607	0.134886	97.751		2.32622	1.60802	0.0250564	0.750394	0.270817	0.0080492		0.729062	0.263118	0.00782038		0.121199	0.65		0.02823	1227.57	5.40904
	TA	LH17	#206	51.4042	0.0408438	28.4113	0.564409	bdl	0.0824342	13.6122	3.63441	0.181712	97.935		2.38873	1.55602	0.021934	0.677747	0.327452	0.0107723		0.667092	0.322305	0.010603		0.162254	0.65		0.00977	1221.87	6.35905
	TA	LH17	#207	46.7622	bdl	31.1046	0.525406	bdl	0.0957913	16.7598	1.83423	0.0753426	97.229		2.21105	1.73334	0.0207757	0.849076	0.168153	0.00454468		0.830982	0.16457	0.00444783		0.0665078	0.65
	TA	LH17	#208	47.1146	bdl	30.9744	0.474118	bdl	0.116362	16.6346	1.97826	0.0690671	97.387		2.22266	1.72217	0.0187051	0.84082	0.180946	0.00415669		0.819575	0.176374	0.00405166		0.0722703	0.65
	TA	LH17	#209	46.6482	0.0439416	31.4474	0.533559	bdl	0.0942292	16.8843	1.80845	0.04	97.526		2.19946	1.74752	0.0210388	0.85298	0.165323	0.00220777		0.835836	0.162001	0.0021634		0.0650893	0.65
	TA	LH17	#210	46.7228	bdl	30.9264	0.423053	bdl	0.0956656	16.853	1.95206	0.060195	97.066		2.21396	1.72714	0.0167645	0.855641	0.179342	0.00363882		0.823824	0.172673	0.0035035		0.0703888	0.65
	TA	LH17	#211	46.8124	bdl	30.856	0.430285	bdl	0.0939728	16.8922	2.02737	0.0775148	97.232		2.2156	1.72118	0.0170311	0.856625	0.186042	0.0046803		0.8179	0.177632	0.00446872		0.0729347	0.65
	TA	LH17	#212	50.7147	0.0630949	28.7329	0.564164	bdl	0.127343	14.0648	3.58243	0.157561	98.028		2.36039	1.57611	0.0219589	0.701386	0.323277	0.00935528		0.678311	0.312641	0.0090475		0.154786	0.65		0.00981	1222.81	6.16221
	TA	LH17	#214	53.6149	0.0747738	27.1207	0.514499	bdl	0.15846	12.0158	4.36875	0.257915	98.14		2.47272	1.47417	0.019844	0.593765	0.390655	0.0151749		0.594005	0.390814	0.015181		0.22095	0.65		0.12468	1213.28	7.70134
	TA	LH17	#215	52.0668	0.0630858	27.6843	0.447261	bdl	0.136687	13.2135	3.91016	0.190359	97.722		2.42147	1.51742	0.0173954	0.658429	0.352581	0.011294		0.644063	0.344889	0.0110476		0.179831	0.65		0.03449	1219.17	6.74578
	TA	LH17	#216	50.9008	0.0553552	28.3009	0.461376	bdl	0.122894	13.7361	3.60357	0.152313	97.35		2.38122	1.56038	0.0180503	0.68851	0.326854	0.0090901		0.672075	0.319052	0.00887311		0.159426	0.65		0.01439	1222.07	6.25833
	TA	LH17	#217	51.1537	0.0592903	28.4325	0.559947	bdl	0.132753	13.7514	3.53369	0.144204	97.778		2.38166	1.56017	0.0218024	0.685998	0.31899	0.00856524		0.676825	0.314725	0.0084507		0.15616	0.65		0.01344	1222.52	6.17823
	TA	LH17	#218	51.7861	0.0558398	28.323	0.666315	bdl	0.1127	13.284	3.73477	0.147061	98.123		2.39896	1.54634	0.0258134	0.659343	0.335444	0.00869093		0.657058	0.334281	0.00866081		0.170853	0.65		0.02933	1220.24	6.49877
	TA	LH17	#219	47.6254	bdl	30.5374	0.510764	bdl	0.107217	16.2319	2.23435	0.0691251	97.388		2.24467	1.6963	0.0201322	0.819704	0.204179	0.00415632		0.797347	0.19861	0.00404296		0.0836505	0.65
	TA	LH17	#220	49.9667	0.0515946	28.9045	0.480637	bdl	0.109711	14.5065	3.29413	0.115166	97.436		2.3418	1.59658	0.0188384	0.72846	0.299335	0.00688574		0.704043	0.289302	0.00665495		0.137996	0.65		0.01743	1225.03	5.74486
	TA	LH17	#221	51.1342	0.0554246	28.2326	0.521776	bdl	0.11932	13.5328	3.65252	0.17429	97.437		2.38856	1.55429	0.0203828	0.677307	0.330799	0.0103862		0.66501	0.324793	0.0101976		0.164019	0.65		0.01354	1221.54	6.38771
	TA	LH17	#222	47.7232	0.0439373	30.395	0.609252	bdl	0.110847	16.2041	2.18327	0.0863541	97.356		2.24964	1.68866	0.024018	0.818429	0.199544	0.00519308		0.799898	0.195026	0.0050755		0.0818789	0.65
	TA	LH17	#223	48.2388	bdl	30.3354	0.533356	bdl	0.083628	16.1476	2.39197	0.0716643	97.858		2.2615	1.67612	0.020911	0.811111	0.217422	0.0042861		0.785337	0.210513	0.0041499		0.0900196	0.65
	TA	LH17	#224	52.207	0.0665202	27.072	0.801072	bdl	0.130527	12.5543	4.17642	0.302877	97.353		2.43792	1.48994	0.0312837	0.628141	0.378131	0.0180433		0.61323	0.369155	0.017615		0.202162	0.65		0.05943	1216.67	7.3724
	TA	LH17	#225	47.9568	0.0478842	30.5938	0.596341	bdl	0.0854925	16.247	2.29068	0.0999028	97.931		2.24812	1.69028	0.0233787	0.816047	0.2082	0.00597456		0.792108	0.202093	0.00579929		0.0856803	0.65
	TA	LH17	#235	52.2535	0.0598767	28.224	0.807835	bdl	0.105742	13.136	3.90111	0.147837	98.636		2.40779	1.53277	0.0311302	0.648545	0.348528	0.00869051		0.644828	0.346531	0.0086407		0.180473	0.65		0.04582	1218.7	6.70309
	TA	LH17	#236	50.2894	0.0406516	28.7139	0.628232	bdl	0.123069	14.4016	3.35779	0.154708	97.753		2.3498	1.58126	0.0245488	0.721009	0.304198	0.00922205		0.697012	0.294073	0.00891512		0.141687	0.65		0.00627	1224.78	5.87562
	TA	LH17	#237	52.4271	0.0447817	27.6567	0.792145	bdl	0.116743	12.7796	4.28976	0.156224	98.263		2.42531	1.50788	0.0306459	0.633435	0.384761	0.00921973		0.616532	0.374494	0.00897371		0.203988	0.65		0.09928	1214.94	7.2034
	TA	LH17	#238	51.3189	0.0483316	28.3621	0.752392	bdl	0.108802	13.6922	3.69819	0.157831	98.16		2.38224	1.55168	0.0292085	0.681011	0.332847	0.0093467		0.665567	0.325298	0.00913474		0.164136	0.65		0.01827	1221.37	6.36574
	TA	LH17	#239	51.3793	0.063419	28.5924	0.892536	bdl	0.0997625	13.65	3.65873	0.193564	98.543		2.37617	1.55846	0.03452	0.676384	0.328069	0.0114201		0.665815	0.322943	0.0112417		0.162887	0.65		0.00772	1221.87	6.38743
	TA	LH17	#257	47.9543	bdl	30.6694	0.653421	bdl	0.0818704	16.4419	2.1746	0.100019	98.105		2.24476	1.69201	0.0255794	0.824645	0.197364	0.00597286		0.802198	0.191992	0.00581028		0.080374	0.65
	TA	LH17	#258	47.1849	0.058777	30.9341	0.604661	bdl	0.111214	16.6936	2.13207	0.080142	97.81		2.21934	1.7148	0.0237842	0.841284	0.194432	0.00480882		0.808519	0.18686	0.00462153		0.077614	0.65
	TA	LH17	#259	47.7543	bdl	30.536	0.630039	bdl	0.0777196	16.0503	2.30778	0.0864951	97.477		2.24813	1.69424	0.0248046	0.809591	0.210644	0.00519468		0.789514	0.20542	0.00506586		0.0873772	0.65
	TA	LH17	#260	52.4441	0.08236	27.7467	0.676805	bdl	0.132225	13.0672	4.22058	0.24722	98.644		2.41964	1.50877	0.0261141	0.645966	0.37755	0.0145511		0.622278	0.363705	0.0140175		0.196281	0.65		0.05861	1217.01	7.16326
	TA	LH17	#278	47.9126	bdl	30.7628	0.45433	bdl	0.106041	16.3665	2.24717	0.0934796	97.993		2.24437	1.69834	0.017798	0.821436	0.204092	0.00558623		0.796649	0.197934	0.00541766		0.0834387	0.65
	TA	LH17	#279	51.5228	bdl	28.717	0.560691	bdl	0.129958	13.6897	3.6233	0.16727	98.448		2.38182	1.5646	0.0216765	0.678073	0.324758	0.00986477		0.669572	0.320687	0.00974109		0.160842	0.65		0.012	1221.97	6.30878
	TA	LH17	#280	52.1801	0.0450409	28.5618	0.55366	bdl	0.117419	13.3569	3.90396	0.137211	98.866		2.39927	1.5478	0.0212899	0.658039	0.348038	0.00804862		0.648874	0.34319	0.00793651		0.177619	0.65		0.04352	1219.05	6.6261
	TA	LH17	#281	52.2161	bdl	28.394	0.489432	bdl	0.111718	13.3335	4.04742	0.190292	98.84		2.40322	1.54017	0.018838	0.657513	0.361171	0.0111729		0.638451	0.3507	0.010849		0.184469	0.65		0.04453	1218.39	6.83948
	TA	LH17	#282	51.7422	0.0598778	28.6831	0.568861	bdl	0.115185	13.441	3.8344	0.176525	98.639		2.38691	1.55946	0.0219459	0.664351	0.342954	0.0103886		0.652801	0.336991	0.010208		0.173361	0.65		0.02665	1220.07	6.5883
	TA	LH17	#283	48.4359	0.0480075	30.2931	0.660986	bdl	0.124842	15.9492	2.50002	0.0740313	98.109		2.26466	1.6693	0.0258454	0.799	0.226634	0.0044158		0.77569	0.220023	0.00428698		0.0952562	0.65
	TA	LH17	#284	49.0598	bdl	30.385	0.612161	bdl	0.123853	15.9189	2.51202	0.0745575	98.732		2.27668	1.66185	0.0237574	0.791523	0.22602	0.00441394		0.774517	0.221164	0.00431911		0.0958952	0.65
	TA	LH17	#285	52.2351	0.0973597	28.2104	0.875694	bdl	0.103918	12.8602	4.05605	0.258323	98.697		2.4069	1.532	0.0337446	0.634918	0.362365	0.0151851		0.627099	0.357903	0.0149981		0.191665	0.65		0.04339	1217.9	7.08953
	TA	LH17	#289	48.3992	bdl	30.2686	0.615184	bdl	0.121254	16.1205	2.57172	0.0653962	98.246		2.26188	1.66716	0.0240431	0.8072	0.233024	0.00389889		0.773089	0.223176	0.00373413		0.0969467	0.65
	TA	LH17	#290	51.8846	0.0555734	27.8237	0.596489	bdl	0.108424	13.0906	3.86644	0.155098	97.588		2.41559	1.52671	0.0232243	0.653006	0.349014	0.00921188		0.645753	0.345137	0.00910957		0.17949	0.65		0.04199	1218.93	6.6932
	TA	LH17	#291	48.8445	bdl	30.6344	0.581922	bdl	0.108816	16.0902	2.35421	0.0876947	98.748		2.26682	1.67558	0.0225851	0.800084	0.211833	0.00519198		0.786626	0.20827	0.00510465		0.0889143	0.65
	TA	LH17	#292	47.8259	0.0442129	30.6492	0.510343	bdl	0.111542	16.3575	2.34992	0.0760339	97.948		2.24284	1.69399	0.0200149	0.821912	0.213666	0.00454885		0.790204	0.205423	0.00437336		0.087302	0.65
	TA	LH17	#293	47.7105	bdl	30.807	0.658871	bdl	0.115156	16.2961	2.20783	0.0542606	97.893		2.23759	1.70283	0.0258418	0.818888	0.200761	0.00324646		0.800559	0.196268	0.0031738		0.0823322	0.65
	TA	LH17	#294	47.5668	0.0405038	30.9642	0.553086	bdl	0.102185	16.6654	2.01278	0.062961	97.982		2.22997	1.71085	0.0216843	0.837116	0.182953	0.00376553		0.817628	0.178694	0.00367787		0.0733952	0.65
	TA	LH17	#295	48.2866	bdl	30.7285	0.681318	bdl	0.115594	15.8445	2.37392	0.0653604	98.129		2.25515	1.6914	0.0266106	0.792867	0.214962	0.00389424		0.78368	0.212471	0.00384911		0.0910491	0.65
	TA	LH17	#296	51.7114	0.0410099	28.5529	0.466105	bdl	0.159895	13.7303	3.50165	0.107712	98.271		2.39183	1.55651	0.0180296	0.680454	0.314026	0.00635574		0.679886	0.313764	0.00635044		0.154982	0.65		0.02186	1222.41	6.10488
	TA	LH17	#297	51.702	0.0558639	28.3804	0.529262	bdl	0.120265	13.2976	3.84041	0.151516	98.128		2.39591	1.55002	0.0205112	0.660252	0.345055	0.0089574		0.650966	0.340202	0.00883143		0.175506	0.65		0.03605	1219.52	6.60202
	TA	LH17	#298	50.873	0.0407404	28.5166	0.519674	bdl	0.108388	14.0769	3.49876	0.146312	97.798		2.37139	1.56664	0.0202583	0.703066	0.316211	0.00870066		0.683931	0.307605	0.00846387		0.151041	0.65		0.01019	1223.31	6.06794
	TA	LH17	#299	48.9711	bdl	30.3222	0.577334	bdl	0.110454	15.8212	2.52476	0.0984444	98.477		2.27815	1.66249	0.0224608	0.788594	0.227724	0.0058424		0.771498	0.222787	0.00571574		0.0969771	0.65
	TA	LH17	#303	52.0687	0.0484855	28.2644	0.469646	bdl	0.144904	13.1781	3.83151	0.16713	98.187		2.40863	1.54095	0.0181685	0.653159	0.343645	0.00986292		0.648833	0.341369	0.0097976		0.176687	0.65		0.034	1219.48	6.64968
	TA	LH17	#304	49.8825	0.0408831	29.6127	0.591695	bdl	0.0993912	14.875	3.16063	0.105187	98.378		2.3181	1.62188	0.0229952	0.740654	0.284777	0.00623599		0.71792	0.276036	0.00604458		0.129123	0.65		0.02631	1226.25	5.53975
	TA	LH17	#305	52.2036	0.0710893	28.1969	0.615851	bdl	0.111384	13.0677	4.08032	0.183105	98.53		2.40882	1.53342	0.0237649	0.646067	0.365044	0.0107786		0.632228	0.357225	0.0105477		0.18975	0.65		0.05724	1217.5	6.94381
	TA	LH17	#306	50.1929	0.0518713	29.1494	0.493212	bdl	0.110299	14.5687	3.21405	0.176952	97.987		2.33925	1.6011	0.0192231	0.727491	0.290425	0.0105208		0.707376	0.282395	0.0102299		0.134067	0.65		0.00281	1226.06	5.74006
	TA	LH17	#307	48.9812	0.040611	29.9081	0.574474	bdl	0.102455	15.6391	2.60822	0.0957799	97.95		2.28996	1.64795	0.0224608	0.783401	0.236423	0.00571257		0.763894	0.230536	0.00557033		0.101349	0.65
	AB	LH18	#191	51.5258	0.0673888	29.0599	0.383878	bdl	0.17379	13.8169	3.54831	0.0860896	98.662		2.37492	1.57861	0.014797	0.682351	0.317098	0.00506214		0.679287	0.315674	0.00503941		0.329092	0.72		-0.32748	1245.08	7.68348
	AB	LH18	#192	50.5676	0.0519958	28.9634	0.514439	bdl	0.196766	14.0405	3.59495	0.0766441	98.047		2.35221	1.58785	0.0200122	0.699777	0.324223	0.00454822		0.680354	0.315224	0.00442198		0.328107	0.72		-0.32518	1245.07	7.65815
	AB	LH18	#193	51.4275	0.104325	28.8517	0.445713	bdl	0.191757	12.9869	3.90569	0.0988584	98.039		2.38283	1.57552	0.0172706	0.644727	0.350866	0.00584344		0.643802	0.350363	0.00583506		0.385387	0.72		-0.28686	1240.79	8.29659
	AB	LH18	#194	52.1488	0.0823562	28.6342	0.441081	bdl	0.154885	13.0403	3.84859	0.101532	98.475		2.40283	1.55497	0.0169963	0.643783	0.343818	0.00596816		0.64795	0.346043	0.00600679		0.378199	0.72		-0.29499	1241.39	8.22625
	AB	LH18	#195	51.2734	0.0785054	29.1511	0.531265	bdl	0.190512	13.7494	3.51267	0.0881681	98.575		2.36632	1.58559	0.0205045	0.679893	0.314316	0.00519101		0.680301	0.314505	0.00519413		0.327384	0.72		-0.32896	1245.23	7.66883
	AB	LH18	#196	51.3822	0.082247	29.0114	0.447221	bdl	0.162225	13.6555	3.6854	0.0947844	98.521		2.37272	1.57891	0.0172708	0.675638	0.329963	0.00558378		0.668165	0.326313	0.00552202		0.345845	0.72		-0.32002	1243.86	7.87414
	AB	LH18	#197	50.8683	0.0709461	29.4413	0.416457	0.0497405	0.148841	13.8567	3.52307	0.0946704	98.477		2.35189	1.60429	0.0161026	0.686438	0.315819	0.00558396		0.681098	0.313362	0.00554052		0.325812	0.72		-0.3312	1245.4	7.6602
	AB	LH18	#198	51.706	0.0753731	29.2911	0.501674	bdl	0.186352	13.4931	3.87742	0.119992	99.295		2.36962	1.58208	0.0192272	0.662558	0.34453	0.00701532		0.653344	0.339739	0.00691776		0.368243	0.72		-0.30838	1242.32	8.14458
	AB	LH18	#199	51.9853	0.0680046	29.1229	0.451951	bdl	0.20016	13.6673	3.90759	0.124746	99.538		2.37718	1.56954	0.0172834	0.669634	0.346447	0.00727722		0.654349	0.33854	0.00711111		0.36638	0.72		-0.31088	1242.49	8.12975
	AB	LH18	#200	51.8638	0.0786374	28.7747	0.485005	bdl	0.194611	13.1837	3.8774	0.0794847	98.561		2.39033	1.563	0.0186937	0.651034	0.346483	0.00467343		0.649611	0.345725	0.00466321		0.376885	0.72		-0.29054	1241.28	8.17962
	AB	LH18	#201	53.6586	0.132553	27.7314	0.803909	bdl	0.322945	12.5573	4.28441	0.0915538	99.6		2.44292	1.48798	0.0306079	0.612546	0.378189	0.00531747		0.614974	0.379687	0.00533854		0.437221	0.72
	AB	LH18	#202	53.0593	0.0873907	28.8381	0.478453	bdl	0.199385	12.8464	4.21733	0.136659	99.863		2.41084	1.54429	0.0181803	0.625404	0.371528	0.00792143		0.622383	0.369734	0.00788317		0.42069	0.72		-0.25287	1238.31	8.70849
	AB	LH18	#203	51.4403	0.0679642	29.5827	0.682617	bdl	0.148602	13.9057	3.68847	0.115766	99.653		2.35246	1.59445	0.0261067	0.681371	0.327047	0.00675396		0.671187	0.32216	0.00665302		0.339906	0.72		-0.32879	1244.48	7.8381
	AB	LH18	#204	51.6314	0.0903816	29.4067	0.616473	bdl	0.161513	13.5573	3.68758	0.0954791	99.275		2.36576	1.58803	0.0236226	0.665585	0.327601	0.00558115		0.666407	0.328005	0.00558804		0.348556	0.72		-0.31846	1243.66	7.90453
	AB	LH18	#205	51.5828	0.071796	29.6348	0.458832	bdl	0.190663	13.9404	3.59606	0.111401	99.649		2.35681	1.59579	0.0175319	0.682445	0.318561	0.0064933		0.677365	0.31619	0.00644496		0.330564	0.72		-0.33302	1245.17	7.73297
	AB	LH18	#206	50.0075	0.0488895	30.8713	0.453263	bdl	0.127136	14.9828	2.90778	0.0443479	99.443		2.29493	1.66973	0.0173957	0.73672	0.258728	0.00259637		0.738163	0.259235	0.00260146		0.248698	0.72		-0.30651	1250.59	6.74725
	AB	LH18	#207	51.695	0.0902406	29.1376	0.497143	bdl	0.212486	13.4992	3.80873	0.104198	99.058		2.37382	1.57692	0.0190914	0.664172	0.339099	0.00610404		0.658003	0.33595	0.00604735		0.361558	0.72		-0.31045	1242.71	8.0531
	AB	LH18	#209	51.4553	0.0715397	29.356	0.440261	0.0401253	0.188083	13.8193	3.78773	0.102123	99.264		2.36105	1.58755	0.0168944	0.679413	0.336978	0.005978		0.664548	0.329605	0.00584721		0.351235	0.72		-0.31768	1243.49	7.93921
	AB	LH18	#210	51.6362	0.0862359	29.0169	0.421545	bdl	0.160805	13.4847	3.81686	0.119378	98.756		2.37804	1.57497	0.0162355	0.665395	0.340815	0.00701373		0.656711	0.336367	0.00692219		0.362719	0.72		-0.31325	1242.75	8.08664
	AB	LH18	#211	51.1801	0.0793946	30.0748	0.584889	bdl	0.164056	13.8733	3.66979	0.08025	99.721		2.33811	1.61928	0.0223456	0.679074	0.325051	0.004677		0.673149	0.322215	0.00463619		0.338974	0.72		-0.32044	1244.26	7.7796
	AB	LH18	#213	52.1995	0.083441	29.5512	0.409366	bdl	0.179889	13.4011	3.87574	0.0983966	99.813		2.37616	1.5854	0.0155839	0.653615	0.342067	0.0057141		0.652704	0.34159	0.00570613		0.370613	0.72		-0.301	1241.94	8.13976
	AB	LH18	#214	50.7843	0.0487256	29.6865	0.562994	bdl	0.194793	13.9591	3.57274	0.0928185	98.902		2.3403	1.61234	0.0216971	0.689241	0.31922	0.00545676		0.67978	0.314839	0.00538186		0.327983	0.72		-0.32952	1245.22	7.67976
	AB	LH18	#218	49.029	0.044963	31.2146	0.48193	bdl	0.166371	15.5644	2.70377	0.070696	99.29		2.26043	1.6961	0.0185814	0.768853	0.241688	0.00415807		0.757715	0.238187	0.00409784		0.222609	0.72		-0.28574	1252.42	6.4932
	AB	LH18	#219	52.0643	0.0943006	29.1343	0.556406	bdl	0.192228	13.198	3.94966	0.106755	99.296		2.38283	1.5715	0.0212961	0.647194	0.350477	0.00623301		0.644677	0.349114	0.00620877		0.383492	0.72		-0.29045	1241	8.28617
	AB	LH18	#220	52.8716	0.0870018	28.6783	0.360645	bdl	0.187045	12.8848	4.18976	0.113747	99.394		2.41327	1.54274	0.0137663	0.630135	0.370782	0.00662343		0.625419	0.368007	0.00657386		0.416693	0.72		-0.25273	1238.41	8.63525
	AB	LH18	#221	51.5772	0.0944166	29.6233	0.550296	bdl	0.152447	13.7233	3.75232	0.073484	99.554		2.35808	1.59621	0.0210403	0.672251	0.332619	0.00428599		0.666152	0.329601	0.0042471		0.350386	0.72		-0.31129	1243.31	7.8915
	AB	LH18	#222	51.347	0.0792702	29.7217	0.560207	bdl	0.199987	14.2358	3.42095	0.0734473	99.642		2.34758	1.60153	0.0214195	0.697368	0.303249	0.00428391		0.693967	0.30177	0.00426302		0.307941	0.72		-0.33105	1246.58	7.43653
	AB	LH18	#223	51.3917	0.0864555	29.3979	0.50038	bdl	0.147938	13.7803	3.69534	0.0953025	99.106		2.36075	1.59158	0.0192227	0.678248	0.329123	0.00558496		0.669573	0.324913	0.00551353		0.343638	0.72		-0.32144	1244.03	7.85044
	AB	LH18	#224	51.6908	0.0606098	29.8848	0.538336	bdl	0.164377	13.858	3.58294	0.0871081	99.867		2.3549	1.6046	0.0205102	0.676446	0.31648	0.00506263		0.67781	0.317118	0.00507284		0.331317	0.72		-0.32655	1244.92	7.70817
	TA	LH21-2	#4	50.9497	0.0632445	29.2284	0.522001	bdl	bdl	13.312	3.72948	0.219353	98.043		2.3647	1.59881	0.0202611	0.661991	0.335606	0.0129879		0.655057	0.332091	0.0128518		0.148079	0.61		0.00011	1209.93	5.16569
	TA	LH21-2	#6	54.7963	0.120654	26.528	0.769824	bdl	0.131269	10.7546	5.22354	0.431286	98.779		2.50892	1.43151	0.0294769	0.527598	0.46371	0.0251917		0.519034	0.456183	0.0247828		0.25672	0.61		0.35517	1193.12	7.90321
	TA	LH21-2	#8	54.7646	0.147091	26.4638	0.953241	bdl	0.167466	10.9512	5.07294	0.40473	98.925		2.5051	1.4267	0.0364657	0.536733	0.449916	0.0236183		0.531278	0.445344	0.0233783		0.244844	0.61		0.30341	1194.77	7.61499
	TA	LH21-2	#11	54.0631	0.11685	27.2493	0.86792	bdl	0.125525	11.2437	4.88715	0.344484	98.898		2.47492	1.47018	0.0332273	0.551496	0.433772	0.0201181		0.548541	0.431448	0.0200103		0.22974	0.61		0.24644	1196.65	7.20394
	TA	LH21-2	#13	55.1294	0.113308	26.5063	0.771151	0.0603749	0.139118	10.5292	5.2384	0.389717	98.877		2.51807	1.42688	0.0294564	0.515292	0.463905	0.0227087		0.514312	0.463023	0.0226655		0.262962	0.61		0.39379	1191.66	7.97965
	TA	LH21-2	#14	48.4806	bdl	30.6658	0.596164	bdl	0.0747343	15.5504	2.72514	0.0982478	98.224		2.26219	1.68644	0.0232639	0.777457	0.246546	0.00584848		0.754922	0.239399	0.00567895		0.092627	0.61
	TA	LH21-2	#36	51.2857	0.0786884	29.3051	0.394322	bdl	0.128565	13.7078	3.69384	0.150235	98.755		2.36394	1.59198	0.0152001	0.67699	0.330115	0.00883425		0.666368	0.324936	0.00869565		0.14243	0.61		0.00984	1210.34	4.93661
	TA	LH21-2	#37	51.3159	0.0640473	29.5898	0.579457	bdl	0.115959	13.8513	3.72859	0.137726	99.39		2.35272	1.59888	0.0222175	0.680428	0.331444	0.00805548		0.667134	0.324968	0.00789809		0.14228	0.61		0.01314	1210.25	4.91491
	TA	LH21-2	#38	48.7452	bdl	30.8464	0.475243	bdl	0.0638343	15.8745	2.57821	0.0724001	98.719		2.26253	1.68742	0.0184474	0.789471	0.232022	0.00428707		0.76963	0.22619	0.00417933		0.0858438	0.61
	TA	LH21-2	#39	48.7241	0.0484015	31.0431	0.552552	bdl	0.0882946	15.7743	2.44687	0.105373	98.783		2.2588	1.69611	0.0214221	0.783531	0.219934	0.00623189		0.776006	0.217822	0.00617205		0.0819884	0.61
	TA	LH21-2	#40	51.3275	0.0636191	29.1771	0.56212	bdl	0.11896	13.6825	3.60494	0.152251	98.689		2.36715	1.58589	0.02168	0.676106	0.322345	0.00895762		0.671134	0.319974	0.00889175		0.139259	0.61		0.00529	1210.93	4.86589
	TA	LH26-1	#6	48.48	0.0481286	30.7334	0.862448	bdl	bdl	15.3552	2.61405	0.170265	98.299		2.26021	1.6887	0.033626	0.767036	0.236291	0.0101267		0.756854	0.233154	0.00999231		0.0550407	0.53
	TA	LH26-1	#9	55.7116	0.0452286	26.2151	0.535627	bdl	0.0532489	9.8616	5.49358	0.417792	98.368		2.5499	1.41412	0.020502	0.483614	0.487507	0.0243948		0.485792	0.489703	0.0245047		0.180109	0.53		1.10169	1148.42	7.04914
	TA	LH26-1	#10	54.2688	0.0490362	27.2878	0.709077	bdl	0.0628071	11.2278	4.895	0.375865	98.887		2.4828	1.47135	0.0271294	0.550377	0.434201	0.0219372		0.546815	0.43139	0.0217952		0.140956	0.53		0.81916	1157.66	5.69444
	TA	LH26-1	#11	54.286	0.0564565	27.2258	0.649976	bdl	bdl	10.984	4.95	0.403892	98.595		2.48897	1.47118	0.0249221	0.53959	0.440031	0.0236241		0.537844	0.438608	0.0235477		0.145704	0.53		0.84537	1156.74	5.89778
	TA	LH26-1	#12	56.0933	bdl	26.3137	0.449704	0.0706387	0.0496906	9.81477	5.53845	0.448897	98.817		2.5546	1.41238	0.0171276	0.478923	0.489044	0.0260806		0.481791	0.491972	0.0262368		0.182446	0.53		1.11371	1148.25	7.16692
	TA	LH26-1	#13	52.9053	0.060202	28.6151	0.355348	bdl	0.0683462	12.1323	4.29308	0.28397	98.728		2.42691	1.54706	0.0136322	0.59631	0.38183	0.0166183		0.599452	0.383842	0.0167058		0.114407	0.53		0.67921	1163.98	4.65338
	TA	LH26-1	#14	54.2799	bdl	27.1067	0.638883	bdl	0.0625779	10.9943	5.03023	0.232673	98.39		2.49212	1.46677	0.0245305	0.54084	0.447779	0.0136281		0.539627	0.446775	0.0135975		0.147927	0.53		0.89941	1154.27	5.73296
	TA	LH26-1	#15	54.2335	0.0714052	27.0509	0.601686	bdl	0.058784	10.9703	5.01116	0.454257	98.452		2.49148	1.46463	0.0231161	0.539982	0.446349	0.0266225		0.533077	0.440641	0.0262821		0.147689	0.53		0.84904	1156.75	6.03104
	TA	LH26-1	#18	51.5194	0.0487249	29.1048	0.782112	bdl	0.0567348	13.4826	3.67738	0.203314	98.9		2.37142	1.57891	0.0301067	0.664942	0.328188	0.0119388		0.661588	0.326533	0.0118786		0.0881845	0.53
	TA	LH26-1	#19	53.5629	0.0450452	27.5391	0.540207	bdl	0.0719733	11.7533	4.65724	0.292154	98.469		2.46314	1.49255	0.020775	0.579103	0.41524	0.0171394		0.572529	0.410526	0.0169448		0.128114	0.53		0.75482	1160.24	5.13824
	TA	LH26-1	#20	54.3916	bdl	27.2584	0.557277	bdl	bdl	10.658	4.89189	0.380814	98.227		2.49781	1.47531	0.021402	0.524414	0.435563	0.02231		0.53387	0.443417	0.0227123		0.148399	0.53		0.86765	1155.89	5.96848
	TA	LH26-1	#36	52.8426	bdl	28.4578	0.663736	bdl	0.0626904	12.5761	4.12928	0.241971	99.019		2.42095	1.53659	0.0254304	0.617336	0.366795	0.0141424		0.618404	0.367429	0.0141669		0.106158	0.53		0.65154	1165.88	4.3036
	TA	LH26-1	#37	53.2138	bdl	28.2957	0.710447	bdl	0.0686492	12.3055	4.44553	0.245118	99.332		2.43039	1.5231	0.0271356	0.602176	0.393661	0.0142819		0.596144	0.389717	0.0141388		0.116802	0.53		0.70181	1162.9	4.67851
	TA	LH26-1	#38	51.6258	bdl	28.7531	0.617724	bdl	bdl	13.2511	3.8026	0.248687	98.379		2.38708	1.5669	0.0238864	0.656487	0.340901	0.0146694		0.648666	0.336839	0.0144946		0.09278	0.53
	TA	LH26-1	#39	54.8745	bdl	27.035	0.489246	bdl	0.0628965	10.6498	5.20532	0.425399	98.776		2.50814	1.45634	0.018701	0.52155	0.461291	0.0248048		0.517592	0.457791	0.0246166		0.158027	0.53		0.93081	1153.81	6.33622
	TA	LH26-1	#42	50.5394	bdl	29.9953	0.739541	bdl	bdl	14.3937	3.33406	0.208086	99.311		2.32414	1.6257	0.0284413	0.709215	0.29727	0.0122077		0.696201	0.291815	0.0119837		0.0748904	0.53
	TA	LH26-1	#45	48.5179	bdl	31.2047	0.693095	bdl	0.041323	15.7274	2.50282	0.0987716	98.812		2.24995	1.70548	0.0268794	0.781451	0.225034	0.00584335		0.771934	0.222293	0.00577219		0.0514516	0.53
	TA	LH26-1	#46	53.9857	bdl	27.4933	0.507633	bdl	0.0759392	11.2552	4.83895	0.363831	98.558		2.47693	1.48668	0.0194778	0.5533	0.43046	0.0212958		0.550517	0.428295	0.0211886		0.139003	0.53		0.80826	1158.06	5.61333
	TA	LH26-1	#47	53.0565	0.0415272	28.4987	0.56027	bdl	bdl	12.6446	4.17268	0.253755	99.268		2.42451	1.53485	0.021411	0.619103	0.369697	0.0147931		0.616886	0.368373	0.0147401		0.106693	0.53		0.65143	1165.82	4.33558
	TA	LH26-1	#48	48.3082	bdl	31.2811	0.628244	bdl	0.0412421	16.1139	2.2082	0.100769	98.704		2.24337	1.71205	0.0243986	0.801778	0.198822	0.00596986		0.796545	0.197524	0.00593089		0.0443061	0.53
	TA	LH26-1	#51	52.1644	bdl	28.3748	1.25766	bdl	0.644834	12.814	3.65582	0.232706	99.178		2.39145	1.53312	0.0482178	0.629423	0.324951	0.0136099		0.650241	0.335699	0.01406		0.0922419	0.53
	TA	LH26-1	#58	50.1591	bdl	29.9968	0.732631	bdl	0.0904935	14.5424	3.176	0.121168	98.851		2.317	1.63308	0.028302	0.719755	0.284448	0.00714042		0.711682	0.281258	0.00706033		0.0706109	0.53
	TA	LH26-1	#59	53.916	0.0599945	27.0926	0.600323	bdl	0.0775704	11.3903	4.80197	0.380269	98.319		2.48191	1.46985	0.0231105	0.561793	0.428583	0.0223315		0.554744	0.423205	0.0220513		0.136305	0.53		0.78696	1158.93	5.54148
	TA	LH26-1	#71	48.8558	bdl	30.6958	0.675142	bdl	bdl	15.1879	2.8746	0.15337	98.508		2.27131	1.68188	0.0262489	0.75654	0.25911	0.00909615		0.73827	0.252853	0.00887649		0.0611935	0.53
	TA	LH26-1	#72	49.1318	bdl	30.5614	0.709079	bdl	bdl	14.9457	2.94017	0.179792	98.536		2.28182	1.67281	0.0275403	0.743718	0.264751	0.0106524		0.729764	0.259783	0.0104525		0.0636035	0.53
	TA	LH26-1	#90	53.6667	0.048958	27.7659	0.51487	bdl	0.0475052	11.5986	4.75424	0.324194	98.751		2.46049	1.50032	0.0197411	0.569763	0.422615	0.0189618		0.563375	0.417876	0.0187492		0.132526	0.53		0.77526	1159.35	5.33317
	TA	LH26-1	#91	47.3723	bdl	31.8795	0.559926	bdl	bdl	16.6385	1.99823	0.0852087	98.571		2.20747	1.75081	0.0218201	0.830724	0.180536	0.00506539		0.81738	0.177636	0.00498403		0.0388293	0.53
	TA	LH26-1	#94	53.7048	bdl	28.2573	0.497102	bdl	0.0764011	12.1289	4.38228	0.263373	99.34		2.4473	1.51761	0.0189441	0.592199	0.387187	0.015311		0.595356	0.389251	0.0153926		0.116817	0.53		0.69684	1163.1	4.70794
	TA	LH26-1	#105	54.6829	0.0454481	27.4011	0.551852	bdl	0.0726171	11.1352	4.91341	0.368459	99.171		2.49118	1.47122	0.0210248	0.54353	0.433993	0.0214141		0.544108	0.434455	0.0214369		0.142663	0.53		0.83225	1157.14	5.74391
	TA	LH26-1	#106	52.4687	0.0415992	29.0743	0.636073	bdl	0.114489	12.855	4.11096	0.200681	99.509		2.39497	1.5641	0.0242808	0.628704	0.363822	0.0116859		0.626067	0.362296	0.0116369		0.103394	0.53		0.65099	1166.27	4.14834
	TA	LH26-1	#107	54.3386	0.0455009	27.8782	0.586598	bdl	0.0573959	11.2253	4.85293	0.31076	99.317		2.47264	1.49511	0.0223228	0.547298	0.428157	0.0180399		0.550882	0.43096	0.0181581		0.139776	0.53		0.82518	1157.3	5.56733
	TA	LH26-1	#108	52.2817	0.0528761	29.2561	0.587693	bdl	0.0705105	13.0691	3.89026	0.213783	99.422		2.38843	1.5752	0.0224528	0.639709	0.344579	0.0124593		0.641797	0.345703	0.0125		0.0962406	0.53
	TA	LH26-1	#109	54.7826	bdl	26.9205	0.477238	bdl	0.0436708	10.6491	5.08485	0.403817	98.399		2.51194	1.45481	0.0183003	0.52318	0.452055	0.0236216		0.523779	0.452573	0.0236486		0.154381	0.53		0.90746	1154.54	6.19147
	TA	LH26-1	#111	54.5997	0.0413367	26.9146	0.58474	bdl	0.0492989	10.5315	5.15365	0.407692	98.286		2.50753	1.4568	0.0224582	0.518227	0.458901	0.0238862		0.517702	0.458436	0.023862		0.158216	0.53		0.93507	1153.61	6.32397
	TA	LH26-1	#114	53.4031	0.0602975	27.999	0.64064	bdl	0.0931743	11.7044	4.66101	0.319972	98.896		2.44662	1.51182	0.0245455	0.574545	0.414026	0.0187013		0.570397	0.411037	0.0185663		0.128753	0.53		0.75236	1160.34	5.19845
	TA	LH26-1	#115	55.1158	0.0452491	26.8576	0.563003	bdl	0.0608835	10.3135	5.14206	0.458002	98.556		2.52096	1.44781	0.0215355	0.505437	0.456009	0.0267248		0.511487	0.461468	0.0270448		0.161198	0.53		0.94547	1153.51	6.50072
	TA	LH26-1	#121	53.0472	0.0414999	28.309	0.624375	bdl	0.0761439	12.5621	4.29727	0.231344	99.189		2.42678	1.52633	0.0238874	0.615749	0.381159	0.0135016		0.609405	0.377232	0.0133625		0.1106	0.53		0.67439	1164.51	4.4424
	TA	LH26-1	#122	52.7392	bdl	28.4789	0.548172	bdl	0.0531505	12.3947	4.36543	0.239565	98.849		2.42061	1.54053	0.0210408	0.609535	0.388476	0.0140272		0.602284	0.383855	0.0138604		0.113872	0.53		0.68804	1163.67	4.56914
	TA	LH26-1	#126	51.6078	bdl	28.8536	0.665506	bdl	0.0678792	13.0253	3.96364	0.193895	98.442		2.38416	1.571	0.0257116	0.644737	0.355027	0.0114274		0.637601	0.351098	0.0113009		0.0983857	0.53
	TA	LH26-1	#127	52.4284	bdl	28.4962	0.563059	bdl	0.0624165	12.5396	4.16505	0.271857	98.564		2.41416	1.54647	0.0216825	0.618665	0.371848	0.0159697		0.61468	0.369453	0.0158669		0.10739	0.53		0.64979	1165.79	4.38594
	TA	LH26-1	#128	51.5888	0.0446586	28.5783	0.696243	bdl	0.0788668	12.8725	3.93147	0.210652	98.022		2.39223	1.56185	0.0270001	0.639564	0.353467	0.0124616		0.63607	0.351536	0.0123935		0.0987456	0.53
	TA	LH26-1	#132	51.0521	bdl	29.9391	0.518431	bdl	0.0779347	14.1599	3.47991	0.184363	99.449		2.34027	1.61751	0.0198746	0.695483	0.309291	0.0107817		0.68483	0.304554	0.0106165		0.0794573	0.53
	TA	LH26-1	#158	48.639	bdl	30.9799	0.366944	bdl	0.0636257	15.4191	2.61439	0.126833	98.253		2.26491	1.70021	0.0142897	0.769303	0.236039	0.00753455		0.759523	0.233038	0.00743876		0.05482	0.53
	TA	LH26-1	#159	47.7878	bdl	31.824	0.410787	bdl	bdl	16.2451	2.19536	0.0700581	98.592		2.22251	1.74437	0.0159771	0.809508	0.197961	0.00415665		0.800205	0.195686	0.00410889		0.0436928	0.53
	TA	LH26-1	#160	48.6637	bdl	31.1783	0.31082	bdl	bdl	15.3986	2.6842	0.116118	98.389		2.26255	1.70844	0.0120853	0.76709	0.241965	0.00688731		0.755052	0.238168	0.00677923		0.0563585	0.53
	TA	LH26-1	#161	56.0458	0.0415876	26.2237	0.452268	bdl	0.0476905	9.94249	5.38588	0.50602	98.669		2.55655	1.40982	0.017253	0.485937	0.476338	0.0294468		0.489993	0.480314	0.0296926		0.175141	0.53		1.04307	1150.7	7.02098
	TA	LH26-1	#162	54.6784	0.0454704	27.4266	0.582797	bdl	bdl	11.0874	4.98786	0.417792	99.243		2.4904	1.47225	0.0221986	0.541075	0.440467	0.0242757		0.537945	0.437919	0.0241353		0.145448	0.53		0.84133	1156.92	5.9033
	TA	LH26-2	#174	47.2062	bdl	30.7121	0.656936	bdl	0.114244	15.8466	2.40286	0.0689034	97.037		2.23332	1.71245	0.0259915	0.803268	0.220408	0.00415865		0.781515	0.214439	0.00404602		0.0490252	0.53
	TA	LH26-2	#175	49.7509	0.0479123	29.2733	0.6431	bdl	0.104139	14.0986	3.36297	0.126038	97.407		2.33116	1.61659	0.0252003	0.707817	0.305522	0.00753412		0.693345	0.299275	0.00738007		0.0771211	0.53
	TA	LH26-2	#178	48.8897	bdl	29.9444	0.655964	bdl	0.0799154	14.7986	3.02371	0.119447	97.558		2.29275	1.65505	0.0257262	0.743591	0.274932	0.00714616		0.724981	0.268052	0.00696732		0.0660609	0.53
	TA	LH26-2	#179	48.6826	0.0478868	30.0453	0.722274	bdl	0.0947902	15.0402	2.89816	0.119455	97.667		2.2826	1.66031	0.0283213	0.755582	0.263466	0.00714529		0.736296	0.256741	0.00696291		0.0623012	0.53
	TA	LH26-2	#180	48.6553	0.0442111	30.1025	0.669384	bdl	0.0743586	15.0325	2.97015	0.0825477	97.638		2.28172	1.66376	0.0262521	0.755332	0.270059	0.00493851		0.733098	0.262109	0.00479314		0.0638811	0.53
	TA	LH26-2	#181	46.555	bdl	31.5081	0.615396	0.077982	0.0738449	16.6239	1.90491	0.0539325	97.442		2.19694	1.75238	0.0242863	0.84054	0.17429	0.00324683		0.825616	0.171195	0.00318918		0.0370482	0.53
	TA	LH26-2	#186	53.8687	0.0414551	27.5617	0.63726	bdl	0.100782	11.3712	4.96811	0.197763	98.747		2.4682	1.48835	0.0244184	0.558245	0.441349	0.0115598		0.552087	0.43648	0.0114322		0.141257	0.53		0.86147	1155.66	5.45741
	TA	LH26-2	#187	53.7756	0.0487308	27.3762	0.515852	bdl	0.0643072	11.3184	4.85432	0.214389	98.175		2.4761	1.48563	0.0198638	0.558395	0.433369	0.0125934		0.555972	0.431489	0.0125388		0.138666	0.53		0.83965	1156.57	5.39604
	TA	LH26-2	#196	47.7381	bdl	32.1546	0.625036	bdl	0.0584388	16.684	2.03212	0.0837092	99.391		2.20609	1.75128	0.0241556	0.826097	0.182076	0.00493502		0.815408	0.179721	0.00487117		0.03938	0.53
	TA	LH26-2	#197	47.0787	bdl	32.3981	0.554892	bdl	0.0806336	17.058	1.70711	0.04	98.957		2.18633	1.77323	0.0215504	0.848774	0.153709	0.00155786		0.845358	0.15309	0.00155159		0.0323563	0.53
	TA	LH26-2	#198	47.4634	bdl	31.9566	0.584104	bdl	0.0599169	16.6366	1.92483	0.0437602	98.716		2.20727	1.75151	0.0227166	0.82896	0.173555	0.00259618		0.824745	0.172672	0.00258298		0.0374072	0.53
	TA	LH26-2	#199	54.2226	0.0717988	27.3278	0.781744	bdl	0.122029	11.3836	4.90684	0.260687	99.114		2.476	1.47072	0.0298532	0.556956	0.434428	0.0151862		0.55332	0.431593	0.015087		0.139364	0.53		0.83435	1156.85	5.48021
	TA	LH26-2	#200	47.5384	bdl	31.4725	0.511455	bdl	0.10247	16.3827	2.0141	0.100148	98.155		2.22233	1.73401	0.0199953	0.820586	0.182554	0.00597262		0.813176	0.180906	0.00591868		0.0397485	0.53
	TA	LH26-2	#201	46.6614	bdl	31.9611	0.53949	bdl	0.100262	16.8691	1.76308	0.0607506	97.973		2.18942	1.76746	0.0211695	0.848079	0.160395	0.00363648		0.837931	0.158476	0.00359297		0.0337914	0.53
	TA	LH26-2	#202	52.9684	0.0859218	27.4211	0.8669	bdl	0.124406	11.9486	4.57109	0.202644	98.189		2.44688	1.49292	0.0334905	0.591405	0.409414	0.0119423		0.583953	0.404255	0.0117918		0.123689	0.53		0.74905	1160.58	4.86455
	TA	LH26-2	#203	52.7416	0.0896733	27.4951	0.826724	bdl	0.145166	12.1343	4.61538	0.17404	98.239		2.4377	1.49774	0.0319553	0.600916	0.4136	0.0102621		0.586386	0.4036	0.0100139		0.122976	0.53		0.75211	1160.48	4.79859
	TA	LH26-2	#212	46.4585	bdl	32.4551	0.528098	bdl	0.0857082	17.2031	1.59592	0.04	98.378		2.17214	1.78838	0.0206487	0.86179	0.144671	0.00220772		0.854384	0.143427	0.00218875		0.0299938	0.53
	TA	LH26-2	#213	47.453	bdl	32.5119	0.516663	bdl	0.0508157	16.6491	1.8899	0.0593811	99.182		2.1958	1.77308	0.0199937	0.825453	0.169557	0.00350538		0.826681	0.169809	0.0035106		0.0367008	0.53
	TA	LH26-2	#214	47.7634	bdl	32.5011	0.643694	bdl	0.0718418	16.6376	1.94496	0.0662773	99.655		2.19991	1.76426	0.0247939	0.821055	0.173687	0.00389433		0.822176	0.173924	0.00389965		0.0377962	0.53
	TA	LH26-2	#215	46.7288	bdl	32.4495	0.517467	bdl	0.0786588	17.198	1.80863	0.0547127	98.876		2.17517	1.78022	0.0201441	0.857749	0.163232	0.00324905		0.837457	0.159371	0.00317219		0.0340015	0.53
	TA	LH26-2	#216	46.523	bdl	32.4873	0.693545	bdl	0.0654676	17.2027	1.77906	0.0721311	98.84		2.168	1.78428	0.0270286	0.858937	0.160742	0.00428819		0.838832	0.15698	0.00418782		0.0334365	0.53
	TA	LH26-2	#219	46.4476	bdl	31.6875	0.586333	0.0552896	0.0979372	16.7168	1.86267	0.0561429	97.536		2.19018	1.76101	0.0231216	0.844587	0.170294	0.00337731		0.829443	0.167241	0.00331675		0.0360254	0.53
	TA	LH26-2	#227	46.3483	bdl	31.8757	0.685884	bdl	bdl	16.8273	1.82483	0.0583645	97.692		2.18305	1.76948	0.0270169	0.849215	0.166648	0.00350701		0.833078	0.163481	0.00344037		0.0350618	0.53
	AB	LH27-1	#112	50.8928	0.0888353	28.228	0.53934	bdl	0.18303	13.4007	4.12996	0.0938455	97.567		2.37808	1.55456	0.0210761	0.670922	0.374166	0.00559427		0.638559	0.356117	0.00532442		0.418572	0.76
	AB	LH27-1	#113	51.0282	0.0779718	28.4102	0.494258	bdl	0.192964	13.6039	3.94974	0.135732	97.9		2.37608	1.55913	0.0192469	0.678712	0.356587	0.00806288		0.650505	0.341767	0.00772778		0.394329	0.76
	AB	LH27-1	#115	51.2097	0.0889748	28.2084	0.506842	bdl	0.188929	13.099	4.21986	0.0786917	97.604		2.38852	1.55064	0.0197699	0.654619	0.381612	0.00468236		0.628889	0.366613	0.00449831		0.437534	0.76
	AB	LH27-1	#119	50.4903	0.0850421	28.6648	0.508828	bdl	0.164176	13.9418	3.6464	0.0937444	97.595		2.35937	1.57867	0.0198845	0.698037	0.330369	0.00558845		0.675088	0.319507	0.00540473		0.355221	0.76		-0.40075	1255.29	9.30628
	AB	LH27-1	#121	51.1031	0.0708239	28.6792	0.539791	bdl	0.150466	13.6522	3.98265	0.0923095	98.297		2.37005	1.56759	0.0209359	0.678402	0.358122	0.00546155		0.651067	0.343692	0.00524148		0.396207	0.76
	AB	LH27-1	#122	51.4484	0.0893847	28.5309	0.43883	0.049612	0.184162	13.4234	3.8593	0.0878381	98.119		2.38537	1.55903	0.0170152	0.66684	0.346928	0.00519548		0.65443	0.340472	0.00509879		0.390478	0.76
	AB	LH27-1	#123	51.7371	0.0932354	28.4149	0.479679	bdl	0.133604	13.1353	4.07578	0.0923552	98.162		2.39617	1.55102	0.018579	0.651823	0.365993	0.00545676		0.636998	0.357669	0.00533266		0.421426	0.76
	AB	LH27-1	#129	51.3412	0.104122	28.2829	0.545185	bdl	0.193259	13.1417	4.20248	0.138132	97.949		2.38722	1.5499	0.0211995	0.654712	0.378859	0.00819366		0.628464	0.36367	0.00786517		0.434316	0.76
	AB	LH27-1	#132	51.4328	0.0923565	27.7179	0.53829	bdl	0.158441	12.6614	4.45872	0.0980191	97.179		2.40771	1.52926	0.0210735	0.635067	0.40469	0.00585375		0.607365	0.387037	0.00559841		0.478278	0.76
	AB	LH27-1	#141	50.0452	0.0703028	29.0656	0.609037	bdl	0.1979	14.0869	3.57007	0.10472	97.753		2.33768	1.60014	0.0237915	0.705035	0.323331	0.0062404		0.681453	0.312516	0.00603167		0.344203	0.76		-0.40881	1256.19	9.20358
	AB	LH27-1	#1	50.7934	0.0780659	29.0377	0.518259	bdl	0.17444	13.8578	3.53915	0.0657558	98.068		2.35873	1.58924	0.0201268	0.689504	0.318652	0.0038955		0.681293	0.314858	0.00384911		0.346864	0.76
	AB	LH27-1	#4	51.5185	0.0783224	28.5261	0.483062	bdl	0.180659	13.2356	4.04274	0.120948	98.22		2.38678	1.55756	0.0187157	0.657	0.363137	0.00714837		0.63955	0.353492	0.0069585		0.414843	0.76
	AB	LH27-1	#5	50.8761	0.0744613	29.0556	0.38175	bdl	0.155919	13.6958	3.76118	0.116345	98.137		2.36136	1.58941	0.0148178	0.6811	0.33847	0.00688899		0.663543	0.329745	0.00671141		0.372982	0.76		-0.39521	1254.17	9.52605
	AB	LH27-1	#15	51.2017	0.0818058	28.3978	0.588637	bdl	0.168859	13.3238	4.11861	0.0811212	97.993		2.3804	1.55598	0.0228859	0.663692	0.371246	0.00481125		0.638319	0.357054	0.00462731		0.419831	0.76
	AB	LH27-1	#17	50.4779	0.0591941	28.7476	0.588987	bdl	0.164271	13.6018	3.84229	0.106887	97.596		2.35843	1.58299	0.0230135	0.680915	0.348064	0.00637098		0.657667	0.33618	0.00615346		0.383658	0.76
	AB	LH27-1	#26	50.9998	0.0708051	28.7549	0.486018	bdl	0.186152	13.4445	4.13774	0.11206	98.192		2.36774	1.57337	0.0188701	0.668781	0.372456	0.00663706		0.638227	0.35544	0.00633383		0.417994	0.76
	AB	LH27-1	#42	52.0192	0.0746993	28.1688	0.584534	bdl	0.154533	12.4836	4.53393	0.140941	98.2		2.40796	1.53677	0.0226283	0.619156	0.406919	0.00832304		0.598567	0.393387	0.00804627		0.493271	0.76
	AB	LH27-1	#43	51.5292	0.0894861	28.4752	0.399084	bdl	0.191896	13.2607	4.08066	0.109922	98.157		2.38866	1.55569	0.0154711	0.658628	0.366757	0.00650047		0.638276	0.355424	0.00629961		0.417942	0.76
	AB	LH27-1	#46	50.2407	0.148452	29.0822	0.731044	bdl	0.110484	13.7906	3.8112	0.120354	98.035		2.34022	1.59655	0.0284774	0.688269	0.344199	0.00715186		0.662039	0.331082	0.0068793		0.375345	0.76		-0.39421	1254.02	9.55499
	AB	LH27-1	#58	55.9325	0.154187	25.1631	0.744147	bdl	0.0929779	9.1796	6.45155	0.32595	98.044		2.57233	1.36389	0.0286204	0.452333	0.575271	0.0191237		0.43214	0.54959	0.0182699		0.954537	0.76
	AB	LH27-1	#68	52.211	0.0971211	27.8313	0.779474	bdl	0.120626	12.4721	4.63304	0.123339	98.282		2.41609	1.51789	0.0301654	0.61839	0.415684	0.0072813		0.593832	0.399176	0.00699213		0.504521	0.76
	AB	LH27-1	#71	51.3061	0.0860087	28.7854	0.618879	0.043172	0.188684	13.436	4.00266	0.116859	98.598		2.37103	1.56781	0.0239182	0.665291	0.358644	0.00688949		0.645397	0.347919	0.00668348		0.404604	0.76
	AB	LH27-1	#156	53.4447	0.07208	28.3913	0.54254	bdl	0.214388	12.355	4.43448	0.129736	99.602		2.43165	1.52242	0.0206435	0.602296	0.391188	0.00753033		0.601686	0.390791	0.0075227		0.487476	0.76
	AB	LH27-1	#157	50.8233	0.0712691	29.9224	0.39811	bdl	0.187372	14.2436	3.22623	0.0973131	98.993		2.33789	1.62223	0.0153151	0.702029	0.287742	0.00571072		0.705215	0.289048	0.00573664		0.307629	0.76
	AB	LH27-1	#158	51.6978	0.0670132	28.4037	0.689808	bdl	0.221662	12.7075	4.06727	0.103171	97.978		2.39681	1.552	0.0267452	0.631239	0.365604	0.00610206		0.629385	0.364531	0.00608414		0.434707	0.76
	AB	LH27-1	#175	50.7705	0.0602447	30.4041	0.484293	0.0501573	0.165287	14.0362	3.29988	0.0488419	99.341		2.32633	1.6419	0.0185577	0.689101	0.29316	0.00285503		0.699513	0.297589	0.00289817		0.319301	0.76
	AB	LH27-1	#176	51.5162	0.0715378	29.6435	0.409771	bdl	0.193777	13.9061	3.40346	0.10656	99.251		2.36021	1.60064	0.0157001	0.682632	0.302325	0.00622815		0.688703	0.305014	0.00628354		0.332404	0.76		-0.41413	1257.08	9.08231
	AB	LH27-1	#177	52.3142	0.0721146	29.478	0.419902	bdl	0.185764	13.4747	3.82553	0.107419	99.919		2.37901	1.5799	0.0159691	0.656551	0.337299	0.00623184		0.656497	0.337271	0.00623134		0.385589	0.76
	AB	LH27-1	#7	49.7351	0.0736345	28.8575	0.546397	bdl	0.167192	14.1486	3.65514	0.0759784	97.27		2.33642	1.59772	0.021466	0.712152	0.332919	0.0045534		0.678483	0.317179	0.00433813		0.350868	0.76		-0.3983	1255.46	9.23411
	AB	LH27-1	#15	53.3452	0.130203	26.7364	0.816423	bdl	0.148286	11.0419	5.09604	0.208376	97.537		2.47659	1.46291	0.0316978	0.549256	0.458709	0.0123414		0.538324	0.44958	0.0120957		0.626818	0.76
	AB	LH27-1	#20	50.6568	0.0851349	28.7764	0.396187	bdl	0.158752	13.6659	3.74516	0.0785694	97.57		2.36466	1.58316	0.0154663	0.683509	0.33896	0.00467889		0.665444	0.330001	0.00455523		0.372206	0.76		-0.38646	1253.9	9.46524
	AB	LH27-1	#21	51.2832	0.0708248	28.6487	0.395628	bdl	0.20125	13.498	3.97837	0.112092	98.188		2.37826	1.56583	0.0153436	0.670698	0.357714	0.00663156		0.64799	0.345603	0.00640704		0.400302	0.76		-0.38601	1253.87	9.46825
	AB	LH27-1	#33	50.6467	0.0780725	28.8835	0.611933	bdl	0.181958	13.8433	3.79763	0.0789137	98.122		2.35462	1.58262	0.0237919	0.689576	0.342318	0.00468038		0.665245	0.33024	0.00451524		0.372586	0.76		-0.40148	1255.26	9.32294
	AB	LH27-1	#35	51.31	0.0965571	28.4471	0.487682	bdl	0.196753	12.9471	4.12347	0.111674	97.731		2.3877	1.56017	0.0189789	0.645543	0.372039	0.00662962		0.630283	0.363244	0.0064729		0.432555	0.76
	AB	LH27-1	#36	50.957	0.10715	28.2079	0.761031	bdl	0.152872	13.1069	3.97346	0.14814	97.432		2.38206	1.55409	0.0297514	0.656479	0.360134	0.00883447		0.640188	0.351197	0.00861523		0.41174	0.76
	AB	LH27-1	#39	51.7085	0.0965552	27.8848	0.367425	bdl	0.179885	12.9834	4.32654	0.142327	97.696		2.40795	1.53042	0.0143091	0.64781	0.390637	0.00845535		0.618787	0.373136	0.00807654		0.45259	0.76
	AB	LH27-1	#43	50.3434	0.0739463	28.9325	0.425667	bdl	0.158572	13.8503	3.63189	0.0981002	97.538		2.35291	1.5937	0.0166376	0.693578	0.329112	0.00584914		0.674333	0.31998	0.00568684		0.356145	0.76
	AB	LH27-1	#53	50.5316	0.0590877	28.7171	0.501565	bdl	0.16584	13.6655	3.66632	0.0849205	97.392		2.36341	1.58297	0.0196182	0.684818	0.33247	0.00506695		0.669844	0.3252	0.00495616		0.364381	0.76		-0.39343	1254.55	9.39257
	AB	LH27-1	#60	49.4368	0.0845579	29.0483	0.469557	bdl	0.166951	14.5231	3.40029	0.0823723	97.212		2.32505	1.61012	0.0184682	0.731837	0.310058	0.00494221		0.699093	0.296186	0.00472108		0.317986	0.76
	AB	LH27-1	#65	51.2842	0.0819286	28.873	0.29476	bdl	0.199177	13.5451	3.70147	0.0658726	98.049		2.37772	1.5777	0.0114288	0.672874	0.332735	0.0038962		0.666538	0.329602	0.00385951		0.371145	0.76		-0.38418	1253.87	9.43715
	AB	LH27-1	#66	48.2581	0.0407696	30.9167	0.436705	bdl	0.136517	16.0254	2.4818	0.0524476	98.359		2.2497	1.69864	0.0170254	0.800455	0.22432	0.00311916		0.778733	0.218232	0.00303452		0.210334	0.76		-0.31861	1264.43	7.64547
	AB	LH27-1	#67	49.3252	0.0446672	30.3631	0.395059	bdl	0.167154	15.07	3.03256	0.076815	98.491		2.29025	1.66156	0.0153402	0.749722	0.273004	0.00455007		0.729815	0.265756	0.00442926		0.273305	0.76		-0.39888	1260.89	8.38669
	AB	LH27-1	#68	49.3714	0.0446482	30.3312	0.351387	bdl	0.202753	15.0062	3.03849	0.04	98.4		2.29309	1.66031	0.0136485	0.746771	0.273621	0.00194979		0.730451	0.267641	0.00190718		0.275005	0.76		-0.38769	1260.47	8.3472
	AB	LH27-1	#70	48.7867	0.066564	30.3894	0.389159	bdl	0.153004	14.9848	3.01136	0.0545102	97.846		2.28061	1.67427	0.0152136	0.750536	0.272934	0.00325076		0.731003	0.265831	0.00316616		0.272938	0.76		-0.3926	1260.76	8.35329
	AB	LH27-1	#71	48.5607	bdl	30.3742	0.345478	bdl	0.150945	15.5024	2.83558	0.04	97.832		2.2731	1.6757	0.0135242	0.77751	0.257349	0.00156048		0.750188	0.248306	0.00150565		0.248425	0.76		-0.36491	1262.11	8.03995
	AB	LH27-1	#72	51.1559	0.0671288	28.7145	0.456193	bdl	0.214517	13.7583	3.86884	0.0769618	98.323		2.37077	1.56838	0.0176807	0.683177	0.347634	0.00455018		0.659844	0.335761	0.00439478		0.381916	0.76
	AB	LH27-1	#75	50.6518	0.0596017	29.2308	0.445619	bdl	0.146607	14.1348	3.56525	0.0724809	98.307		2.34915	1.59776	0.0172837	0.702393	0.320593	0.00428843		0.683744	0.312081	0.00417457		0.342572	0.76		-0.40125	1256.04	9.14139
	AB	LH27-1	#79	51.0948	0.104372	28.6674	0.613553	bdl	0.148585	13.8328	3.81347	0.0835184	98.385		2.36793	1.5658	0.0237794	0.686873	0.342657	0.00493779		0.663987	0.33124	0.00477327		0.374422	0.76
	AB	LH27-1	#81	51.7518	0.0821952	28.3899	0.574637	bdl	0.143271	13.0017	4.29185	0.105739	98.341		2.3944	1.54807	0.0222341	0.64453	0.385002	0.00624116		0.62227	0.371705	0.00602561		0.44833	0.76
	AB	LH27-1	#84	51.7956	0.108018	27.9752	0.706892	bdl	0.264995	13.1974	4.00999	0.096632	98.168		2.40075	1.52821	0.0274008	0.655412	0.360366	0.00571391		0.641622	0.352784	0.00559369		0.412675	0.76
	AB	LH27-1	#92	51.3276	0.0669284	28.2989	0.464864	bdl	0.166974	13.4849	4.06933	0.0855014	97.965		2.38644	1.55069	0.0180751	0.671771	0.366834	0.00507144		0.643658	0.351483	0.00485921		0.409852	0.76
	AB	LH27-1	#103	51.8051	0.111823	28.0859	0.848214	bdl	0.186195	12.6888	4.28764	0.109889	98.18		2.40031	1.53369	0.0328667	0.629924	0.385177	0.0064954		0.616607	0.377035	0.00635809		0.458935	0.76
	AB	LH27-1	#114	50.3678	0.0448351	29.7309	0.43015	bdl	0.152701	14.3896	3.48461	0.0484652	98.649		2.32973	1.62075	0.016639	0.713139	0.312502	0.00285984		0.693377	0.303842	0.00278059		0.328895	0.76		-0.39929	1256.84	8.96063
	AB	LH27-1	#117	49.7988	0.0668885	29.7051	0.477957	bdl	0.166874	14.8204	3.17453	0.0547759	98.29		2.31512	1.62757	0.0185823	0.738224	0.286141	0.00324865		0.718386	0.278452	0.00316136		0.290918	0.76		-0.40029	1259.56	8.55343
	AB	LH27-1	#120	51.1333	0.0637596	29.2941	0.482399	bdl	0.160856	14.0471	3.69293	0.0641306	98.942		2.35541	1.59037	0.0185833	0.693302	0.329822	0.00376865		0.675146	0.321185	0.00366996		0.357056	0.76		-0.39214	1254.9	9.28381
	AB	LH27-1	#133	50.7237	0.081264	28.5374	0.538225	bdl	0.180788	13.2848	3.88354	0.113253	97.343		2.37255	1.57316	0.0210535	0.665784	0.352191	0.00675791		0.649715	0.343691	0.0065948		0.39703	0.76
	AB	LH27-1	#136	50.4291	0.0885052	28.4314	0.550604	bdl	0.199096	13.6927	3.81131	0.0913225	97.301		2.36376	1.57064	0.0215833	0.687676	0.346373	0.00546084		0.661538	0.333208	0.00525328		0.378041	0.76		-0.38518	1253.57	9.54346
	AB	LH27-1	#137	52.3483	0.111714	27.3074	0.777049	bdl	0.287475	12.5431	4.49583	0.118564	97.993		2.42886	1.49326	0.0301512	0.623557	0.404441	0.00701794		0.602461	0.390758	0.00678051		0.486808	0.76
	AB	LH27-1	#144	50.9217	0.103434	28.3083	0.531617	bdl	0.324322	13.6177	3.51549	0.0827675	97.425		2.37853	1.55839	0.0207664	0.681528	0.318375	0.00493202		0.678249	0.316843	0.00490829		0.350618	0.76		-0.40093	1255.56	9.2452
	AB	LH27-1	#148	50.8054	0.103861	28.6264	0.540484	bdl	0.12727	13.6505	3.87537	0.113728	97.843		2.36721	1.57198	0.0210603	0.681471	0.350095	0.00676011		0.656317	0.337173	0.00651058		0.385583	0.76
	AB	LH27-1	#158	51.8347	0.0713446	28.7199	0.567401	bdl	0.185675	13.4046	4.03816	0.0664201	98.923		2.38458	1.55715	0.0218292	0.660722	0.360181	0.00389807		0.644732	0.351464	0.00380373		0.409148	0.76
	AB	LH27-1	#169	49.7915	0.0558766	30.0724	0.422165	bdl	0.139088	15.0841	2.95683	0.04	98.544		2.3077	1.64266	0.016363	0.749061	0.265704	0.00129865		0.737219	0.261503	0.00127812		0.266231	0.76		-0.37916	1260.96	8.2346
	AB	LH27-1	#171	50.5525	0.0411211	29.6754	0.470732	bdl	0.194281	14.3134	3.37627	0.0595123	98.701		2.3353	1.61567	0.0181857	0.708461	0.302401	0.00350723		0.698425	0.298118	0.00345755		0.320366	0.76		-0.40388	1257.55	8.88413
	AB	LH27-1	#172	48.8256	bdl	30.5795	0.410941	bdl	0.164932	15.5627	2.78269	0.063514	98.43		2.27173	1.67686	0.0159899	0.775833	0.251028	0.00376997		0.752775	0.243567	0.00365792		0.242847	0.76		-0.36968	1262.7	8.02625
	AB	LH27-1	#173	50.9753	0.067469	29.5012	0.418049	bdl	0.200474	13.7991	3.7663	0.04	98.791		2.35011	1.60296	0.016118	0.681636	0.336659	0.00194976		0.668111	0.329978	0.00191107		0.370694	0.76		-0.37602	1253.61	9.38499
	AB	LH27-1	#181	49.9443	0.0740474	29.3761	0.419589	bdl	0.162525	14.1889	3.5004	0.0720385	97.745		2.33178	1.61641	0.0163825	0.709779	0.316859	0.00429066		0.688485	0.307353	0.00416194		0.335059	0.76
	AB	LH27-1	#182	48.7843	0.0593444	30.3853	0.386983	bdl	0.170303	15.5736	2.87644	0.0437382	98.28		2.2741	1.66936	0.0150861	0.777846	0.259975	0.00260106		0.747625	0.249875	0.0025		0.250852	0.76
	AB	LH27-1	#183	47.3734	bdl	31.4031	0.408394	bdl	0.165772	16.3707	2.25847	0.0565907	98.08		2.21825	1.73302	0.0159923	0.82133	0.20504	0.00338049		0.797601	0.199116	0.00328283		0.18737	0.76
	AB	LH27-1	#184	47.3826	bdl	31.387	0.397811	0.0490972	0.154355	16.2934	2.20776	0.04	97.9		2.22085	1.73383	0.0155931	0.81825	0.200632	0.000129943		0.802984	0.196889	0.000127518		0.184032	0.76		-0.24518	1265.38	7.28833
	AB	LH27-1	#187	47.8366	bdl	31.3354	0.37707	bdl	0.162858	16.2053	2.47992	0.0546866	98.484		2.22973	1.7214	0.0146984	0.80932	0.224117	0.00325185		0.780678	0.216186	0.00313676		0.207842	0.76		-0.31449	1264.57	7.6198
	AB	LH27-1	#188	48.686	bdl	30.7152	0.433632	bdl	0.151569	15.4962	2.70055	0.04	98.257		2.26778	1.68619	0.0168918	0.773382	0.243891	0.00155924		0.759087	0.239383	0.00153042		0.23669	0.76		-0.35158	1262.81	7.90834
	AB	LH27-1	#195	48.5238	bdl	31.199	0.37514	bdl	0.180382	15.916	2.47192	0.04	98.743		2.25073	1.70555	0.0145518	0.790996	0.222305	0.00233869		0.778815	0.218882	0.00230267		0.210938	0.76
	AB	LH27-1	#197	51.2399	0.0899827	29.2578	0.630613	bdl	0.200528	13.6607	3.71348	0.0840045	98.877		2.35967	1.58796	0.0242863	0.674042	0.331567	0.00493519		0.667009	0.328107	0.00488369		0.3692	0.76		-0.38996	1254.17	9.44165
	AB	LH27-1	#203	49.1494	0.040755	30.026	0.386563	bdl	0.200029	15.1614	3.01706	0.0502444	98.078		2.29288	1.65089	0.0150813	0.757837	0.272894	0.00299027		0.733115	0.263992	0.00289272		0.270269	0.76		-0.38968	1260.9	8.3171
	AB	LH27-1	#204	49.1529	0.0441976	29.696	0.361092	bdl	0.223008	15.0047	2.8978	0.0564627	97.456		2.3049	1.64118	0.0141604	0.753881	0.263462	0.00337772		0.738577	0.258114	0.00330915		0.262297	0.76
	AB	LH27-1	#205	48.023	bdl	30.2181	0.283445	bdl	0.179345	15.5018	2.73802	0.131795	97.112		2.26668	1.68099	0.0111884	0.783966	0.250567	0.00793593		0.752028	0.240359	0.00761263		0.239886	0.76		-0.38612	1263.33	8.08319
	AB	LH27-1	#208	48.4573	0.0480095	30.4216	0.398601	bdl	0.188203	15.5739	2.74369	0.04	97.877		2.26788	1.67803	0.0156011	0.780967	0.248968	0.00169012		0.757026	0.241336	0.00163831		0.239271	0.76		-0.35533	1262.67	7.93988
	AB	LH27-1	#209	49.8964	bdl	29.4601	0.326361	bdl	0.201764	14.4858	3.30664	0.0436616	97.775		2.32872	1.62046	0.012738	0.724378	0.299214	0.0025996		0.70589	0.291577	0.00253325		0.310024	0.76
	AB	LH27-1	#210	46.7855	bdl	31.4717	0.333355	0.0553994	0.111092	16.6212	2.12405	0.041109	97.58		2.20413	1.74744	0.0131337	0.838998	0.194015	0.0024707		0.810247	0.187367	0.00238604		0.173561	0.76		-0.22966	1266.04	7.22414
	AB	LH27-1	#211	48.8878	0.0482011	30.2946	0.336828	bdl	0.203921	15.5658	2.81793	0.050282	98.223		2.27923	1.6646	0.0131327	0.777557	0.254722	0.00299061		0.751068	0.246044	0.00288872		0.245874	0.76		-0.36915	1262.43	8.04282
	AB	LH27-1	#212	49.3464	0.0514911	29.3771	0.436668	bdl	0.191145	14.573	3.18765	0.0715631	97.235		2.31826	1.62657	0.0171559	0.733547	0.290351	0.00428899		0.713437	0.282392	0.00417141		0.297081	0.76
	TA	LH27-2	#16	54.0488	0.0496183	28.4108	0.628237	bdl	0.119402	12.1489	4.53553	0.225045	100.199		2.44343	1.51374	0.0237516	0.588468	0.397547	0.012979		0.589061	0.397947	0.0129921		0.143652	0.56		0.83901	1185.55	5.96361
	TA	LH27-2	#17	53.6731	bdl	28.1587	0.452692	bdl	0.105017	12.0692	4.5629	0.198581	99.258		2.44818	1.51375	0.0172681	0.589842	0.403528	0.0115553		0.586951	0.40155	0.0114987		0.145473	0.56		0.85396	1184.85	5.98466
	TA	LH27-2	#18	53.1859	bdl	28.7313	0.580145	bdl	0.103378	12.3538	4.44533	0.212524	99.654		2.42044	1.54102	0.0220795	0.602382	0.392236	0.0123386		0.59822	0.389527	0.0122533		0.138459	0.56		0.81725	1186.69	5.78505
	TA	LH27-2	#19	52.9717	bdl	28.7085	0.601375	0.060383	0.0838633	12.2941	4.28507	0.195998	99.246		2.41922	1.54525	0.0229686	0.601594	0.379435	0.0114194		0.606172	0.382322	0.0115063		0.134116	0.56		0.80088	1187.63	5.6319
	TA	LH27-2	#20	54.7802	0.0492409	27.2663	0.65412	bdl	0.0802699	11.1843	4.89779	0.303733	99.216		2.49422	1.46317	0.0249072	0.545623	0.432373	0.0176426		0.548013	0.434267	0.0177199		0.168505	0.56
	TA	LH27-2	#21	52.9214	bdl	28.8733	0.72741	bdl	0.0629255	12.3129	4.18142	0.222824	99.321		2.41499	1.55287	0.02776	0.602028	0.36996	0.012972		0.611221	0.375609	0.01317		0.130672	0.56		0.77968	1188.74	5.5623
	TA	LH27-2	#22	52.8531	bdl	28.6879	0.622673	bdl	0.0763513	12.522	4.42199	0.225283	99.443		2.41321	1.54376	0.0237761	0.612591	0.391461	0.0131223		0.602248	0.384851	0.0129008		0.135882	0.56		0.80301	1187.43	5.7197
	TA	LH27-2	#23	52.6461	bdl	28.6199	0.672905	bdl	0.0720828	12.365	4.18301	0.226099	98.819		2.41581	1.54782	0.025823	0.607943	0.372162	0.0132359		0.612018	0.374657	0.0133246		0.130171	0.56		0.77702	1188.89	5.55008
	TA	LH27-2	#53	52.1906	bdl	29.4793	0.592864	bdl	0.0898362	13.4301	3.79171	0.189855	99.802		2.37749	1.5827	0.0225859	0.655509	0.334894	0.0110333		0.654569	0.334413	0.0110175		0.108636	0.56		0.71905	1193.77	4.81069
	TA	LH27-2	#54	53.0535	0.045659	29.0509	0.602326	bdl	0.0787137	12.7949	4.21734	0.217615	100.061		2.40684	1.55327	0.0228518	0.621932	0.370952	0.0125944		0.618543	0.368931	0.0125258		0.12683	0.56		0.76714	1189.58	5.42598
	TA	LH27-2	#55	52.6278	bdl	28.8458	0.65924	bdl	0.0953146	12.9698	3.98236	0.222761	99.461		2.40308	1.55235	0.025174	0.63454	0.352565	0.0129763		0.634488	0.352537	0.0129752		0.118148	0.56		0.73541	1191.76	5.16
	TA	LH27-2	#87	53.4388	0.0492729	28.5541	0.644318	bdl	0.0669351	12.1761	4.36574	0.245826	99.541		2.43215	1.53164	0.024524	0.593765	0.385247	0.0142732		0.597779	0.387851	0.0143697		0.137965	0.56		0.80653	1187.17	5.81917
	TA	LH27-2	#88	52.951	bdl	28.7552	0.640216	bdl	0.0783249	12.543	4.27876	0.221005	99.55		2.41375	1.54487	0.0244063	0.612623	0.378167	0.0128522		0.6104	0.376795	0.0128056		0.131261	0.56		0.78358	1188.54	5.5724
	TA	LH27-2	#89	53.1438	0.0642943	28.6177	0.595299	bdl	0.106864	12.4258	4.18902	0.222995	99.393		2.42343	1.53804	0.0227022	0.607122	0.37037	0.0129727		0.612967	0.373936	0.0130976		0.12972	0.56		0.77611	1188.96	5.53057
	TA	LH27-2	#90	52.2639	0.0453144	29.034	0.699674	bdl	0.0933624	13.2285	3.92766	0.180348	99.493		2.38835	1.56372	0.0267391	0.64771	0.347998	0.0105139		0.643705	0.345846	0.0104489		0.114246	0.56		0.73479	1192.33	4.97774
	TA	LH27-2	#91	52.3141	0.0527055	28.8542	0.59257	bdl	0.108274	12.9345	4.01062	0.213094	99.08		2.39829	1.559	0.0227184	0.635337	0.356484	0.0124627		0.632627	0.354964	0.0124095		0.119311	0.56		0.74138	1191.39	5.18425
	TA	LH27-2	#93	52.1249	0.0486034	28.4047	0.628837	bdl	0.0622527	12.6773	4.19038	0.231464	98.372		2.40738	1.54612	0.0242881	0.627334	0.375231	0.0136377		0.617331	0.369248	0.0134202		0.127188	0.56		0.76486	1189.63	5.45797
	TA	LH27-2	#94	48.1501	bdl	31.0358	0.592949	bdl	0.0896987	15.8784	2.47566	0.0895321	98.327		2.24559	1.70589	0.0231263	0.793439	0.223857	0.00532684		0.775886	0.218905	0.005209		0.0599933	0.56
	TA	LH27-2	#95	52.0491	0.0446861	28.1277	0.616287	bdl	0.0845522	12.572	4.26906	0.175652	97.939		2.41372	1.53731	0.0239008	0.624667	0.383841	0.0103916		0.61308	0.376721	0.0101989		0.130662	0.56		0.7917	1188.27	5.49317
	TA	LH27-2	#96	53.0664	0.0447219	27.2392	0.539683	bdl	0.097783	11.9305	4.64839	0.232925	97.823		2.45898	1.4876	0.0209137	0.592338	0.417624	0.0137693		0.578607	0.407943	0.0134501		0.149921	0.56		0.86902	1184.11	6.16745
	TA	LH27-2	#97	51.4905	0.0520618	28.4234	0.635504	bdl	0.0806827	13.0637	3.9977	0.197335	97.985		2.39104	1.55558	0.0246793	0.649976	0.359929	0.0116902		0.636236	0.35232	0.0114431		0.117751	0.56		0.74058	1191.63	5.11238
	TA	LH27-2	#98	52.8599	0.0523543	27.7931	0.655892	bdl	0.0717016	12.2129	4.37851	0.253567	98.278		2.43939	1.51164	0.025313	0.603876	0.391767	0.0149282		0.597559	0.387669	0.014772		0.137951	0.56		0.80486	1187.24	5.82815
	TA	LH27-2	#103	52.9767	0.0449598	27.9221	0.839105	bdl	0.0756179	11.7152	4.54085	0.29381	98.425		2.43975	1.51553	0.0323172	0.578076	0.405458	0.0172618		0.577616	0.405136	0.0172481		0.149144	0.56		0.85009	1184.97	6.23387
	TA	LH27-2	#104	53.7675	0.0566141	27.6895	0.743448	0.0435733	0.0761753	11.9049	4.56261	0.287074	99.135		2.4574	1.49151	0.028416	0.582981	0.404311	0.0167382		0.580641	0.402688	0.016671		0.147471	0.56		0.84369	1185.27	6.16859
	TA	LH27-2	#105	52.1397	bdl	28.5129	0.666628	bdl	bdl	12.9317	4.03712	0.216293	98.564		2.4039	1.54933	0.0257032	0.638816	0.360884	0.0127218		0.630978	0.356456	0.0125657		0.120126	0.56		0.74335	1191.22	5.21382
	TA	LH27-2	#106	53.807	bdl	27.5488	0.673525	bdl	0.0721492	11.7952	4.56205	0.232963	98.756		2.46583	1.48793	0.0258127	0.579165	0.405351	0.0136198		0.580247	0.406108	0.0136452		0.148824	0.56		0.86254	1184.41	6.13846
	TA	LH27-2	#107	53.9486	0.0416964	28.01	0.671655	bdl	0.0650289	11.7727	4.66174	0.29055	99.462		2.4559	1.50279	0.0255701	0.574224	0.411458	0.0168737		0.57276	0.410409	0.0168307		0.152367	0.56		0.86876	1184.13	6.32284
	TA	LH27-2	#109	51.2336	0.0449364	29.2173	0.875717	bdl	0.0925836	13.6413	3.61015	0.163388	98.879		2.36041	1.58645	0.0337405	0.673382	0.322481	0.00960306		0.669721	0.320728	0.00955085		0.101833	0.56
	TA	LH27-2	#111	52.7601	0.0489395	28.5074	0.87698	bdl	0.0683817	12.4743	4.08061	0.26636	99.083		2.41625	1.53869	0.0335878	0.612103	0.362334	0.0155619		0.618287	0.365994	0.0157192		0.125872	0.56		0.75053	1190.31	5.46931
	TA	LH27-2	#116	52.595	bdl	28.2488	0.526087	bdl	0.138103	12.2976	4.42052	0.216649	98.486		2.42293	1.53374	0.020268	0.607	0.394836	0.0127324		0.598284	0.389166	0.0125496		0.138316	0.56		0.81541	1186.77	5.78753
	TA	LH27-2	#120	52.5651	bdl	29.1036	0.520646	bdl	0.0897215	12.8765	4.11125	0.187382	99.492		2.3985	1.56511	0.0198674	0.629524	0.363716	0.0109076		0.626924	0.362214	0.0108625		0.122856	0.56		0.75954	1190.29	5.26172
	TA	LH27-2	#121	53.3751	bdl	28.4535	0.640931	bdl	0.11475	12.2191	4.45559	0.225721	99.563		2.43043	1.52699	0.0244069	0.596151	0.393366	0.0131122		0.594588	0.392335	0.0130778		0.140309	0.56		0.82258	1186.38	5.86195
	TA	LH27-2	#122	51.5851	bdl	29.4641	0.549171	0.0535529	0.098888	13.5788	3.83969	0.160001	99.352		2.36398	1.59136	0.0210466	0.666737	0.341164	0.00935407		0.655428	0.335377	0.0091954		0.108806	0.56		0.7272	1193.47	4.77516
	TA	LH27-2	#132	50.1795	bdl	29.7037	0.769049	bdl	0.0772413	14.414	3.44605	0.143097	98.77		2.32201	1.61996	0.029761	0.714655	0.309177	0.00844746		0.692308	0.299509	0.00818331		0.0919933	0.56
	TA	LH27-2	#135	52.7555	0.0448485	28.07	0.665587	bdl	0.0773163	12.022	4.31211	0.204937	98.163		2.43453	1.52668	0.0256868	0.594428	0.38582	0.012065		0.599033	0.388809	0.0121585		0.138017	0.56		0.8156	1186.78	5.76904
	TA	LH27-2	#136	49.2673	0.040506	29.5981	0.735281	bdl	0.0706043	14.6163	3.06291	0.112902	97.504		2.30963	1.63532	0.0288265	0.734167	0.278396	0.00675215		0.720255	0.273121	0.0066242		0.0806333	0.56
	TA	LH27-2	#137	52.7937	0.0525403	28.2128	0.590712	bdl	0.0776371	12.2168	4.43192	0.190298	98.57		2.42854	1.52955	0.0227245	0.602134	0.395277	0.0111675		0.597013	0.391915	0.0110725		0.13959	0.56		0.82722	1186.21	5.7926
	TA	LH27-2	#138	53.9474	0.0681174	27.7752	0.60587	bdl	0.0935627	11.6709	4.8023	0.247674	99.253		2.46098	1.49331	0.0231139	0.570445	0.42475	0.0144137		0.565016	0.420707	0.0142765		0.158331	0.56		0.91143	1182.25	6.44313
	TA	LH27-2	#139	51.7056	0.0673406	28.8027	0.639339	bdl	0.109485	13.0296	3.98119	0.194115	98.536		2.3862	1.5666	0.0246749	0.644275	0.356228	0.0114284		0.636679	0.352028	0.0112936		0.117572	0.56		0.74067	1191.65	5.10324
	TA	LH27-2	#142	54.0076	0.0453308	27.5667	0.652359	bdl	0.0400269	11.7853	4.74978	0.267279	99.118		2.46748	1.48436	0.0249254	0.576918	0.420745	0.0155783		0.569379	0.415247	0.0153748		0.155078	0.56		0.88912	1183.22	6.3708
	TA	LH27-2	#147	51.0566	0.0517439	28.2782	0.721381	bdl	0.111893	12.9112	4.02061	0.22446	97.416		2.38611	1.55757	0.0281942	0.646517	0.364316	0.0133825		0.631232	0.355702	0.0130661		0.119824	0.56		0.7403	1191.37	5.21562
	TA	LH27-2	#156	52.4451	0.0525248	28.3146	0.664777	bdl	0.107903	12.5609	4.31562	0.214575	98.686		2.41388	1.53595	0.0255884	0.619446	0.385124	0.0125993		0.60899	0.378623	0.0123867		0.132204	0.56		0.78919	1188.24	5.59233
	TA	LH27-2	#157	53.5368	bdl	27.9848	0.59658	bdl	0.110289	11.8262	4.54262	0.211095	98.867		2.4509	1.50991	0.0228401	0.580086	0.403205	0.0123285		0.582638	0.404979	0.0123827		0.147802	0.56		0.86225	1184.44	6.07715
	TA	LH27-2	#158	53.0018	0.0450939	28.2452	0.537412	bdl	0.0985963	12.2382	4.29343	0.212705	98.676		2.4335	1.52841	0.0206349	0.602047	0.382201	0.0124588		0.604036	0.383464	0.0125		0.134992	0.56		0.80069	1187.58	5.68247
	TA	LH27-2	#159	53.0932	0.0485579	27.5414	0.571135	bdl	0.094234	11.9784	4.48353	0.244462	98.062		2.45304	1.49971	0.0220679	0.592977	0.401636	0.014409		0.587675	0.398045	0.0142802		0.144026	0.56		0.83575	1185.68	6.00554
	TA	LH27-2	#162	52.6734	bdl	28.6224	0.612554	bdl	0.0987226	12.4863	4.17923	0.170826	98.899		2.41511	1.5467	0.023488	0.613413	0.371526	0.00999213		0.616538	0.373419	0.010043		0.12879	0.56		0.78485	1188.7	5.43064
	TA	LH27-2	#165	51.7407	bdl	28.6217	0.567549	bdl	0.075357	13.1007	3.98634	0.182722	98.329		2.39269	1.55993	0.0219489	0.649117	0.357417	0.0107797		0.63807	0.351334	0.0105962		0.117084	0.56		0.74214	1191.66	5.0718
	TA	LH27-2	#177	53.0583	bdl	28.232	0.587985	bdl	0.064453	11.8901	4.47179	0.230382	98.609		2.43689	1.5282	0.0225842	0.585113	0.398209	0.0134986		0.586979	0.399479	0.0135417		0.144716	0.56		0.84209	1185.39	6.00948
	TA	LH27-2	#178	51.8944	0.0410194	28.4358	0.680872	bdl	0.0639729	12.9795	3.92345	0.184691	98.217		2.40091	1.55052	0.0263438	0.64341	0.351942	0.0109009		0.639412	0.349755	0.0108331		0.116313	0.56		0.7389	1191.89	5.05256
	TA	LH27-2	#179	50.9493	bdl	29.3263	0.717099	bdl	bdl	13.8718	3.72184	0.165523	98.846		2.3512	1.59501	0.0276749	0.685896	0.333009	0.00974469		0.666793	0.323734	0.00947329		0.103239	0.56
	TA	LH27-2	#182	52.5733	0.0525881	28.4854	0.625035	bdl	0.0909749	12.4784	4.27565	0.150605	98.732		2.41557	1.54253	0.0240168	0.614311	0.380894	0.0088278		0.611844	0.379364	0.00879235		0.131844	0.56		0.80228	1187.75	5.49776
	TA	LH27-2	#186	49.0942	bdl	30.1669	0.858494	bdl	0.09557	15.6306	2.62375	0.116059	98.652		2.28086	1.65178	0.033355	0.778066	0.23634	0.00687865		0.76185	0.231414	0.00673529		0.0645902	0.56
	TA	LH27-2	#7	52.1618	0.0444622	28.0624	0.626529	bdl	0.0785199	11.674	4.37128	0.214095	97.233		2.42915	1.54022	0.0244005	0.582498	0.394692	0.0127194		0.588436	0.398715	0.0128491		0.144082	0.56		0.84169	1185.42	5.97354
	TA	LH27-2	#8	52.5672	0.0410475	27.898	0.614213	bdl	0.0903767	12.4121	4.25912	0.193619	98.097		2.43089	1.52047	0.0237533	0.61499	0.38187	0.0114224		0.609938	0.378733	0.0113285		0.132036	0.56		0.79277	1188.11	5.56253
	TA	LH27-2	#9	53.1629	0.0447536	27.4846	0.607154	bdl	0.0677439	11.6091	4.52436	0.345237	97.869		2.45955	1.49863	0.023491	0.575466	0.405837	0.0203762		0.574501	0.405157	0.0203421		0.149961	0.56		0.84234	1185.33	6.33279
	TA	LH27-2	#10	52.7736	0.0446284	27.5359	0.525174	bdl	0.0469128	12.1301	4.37464	0.221474	97.669		2.44857	1.50574	0.0203777	0.603024	0.393536	0.0131092		0.597249	0.389767	0.0129837		0.13877	0.56		0.81577	1186.74	5.81183
	TA	LH27-2	#31	54.1372	bdl	26.5793	0.73414	bdl	0.0977881	10.7825	4.9248	0.261505	97.599		2.50441	1.44913	0.0284017	0.534444	0.441717	0.0154329		0.538975	0.445462	0.0155637		0.175747	0.56		1.00961	1178.41	6.99318
	TA	LH27-2	#34	50.5584	0.0482384	29.1931	0.744266	bdl	0.0580406	13.8299	3.4017	0.183781	98.021		2.35079	1.59977	0.0289404	0.688988	0.306664	0.0109013		0.684502	0.304667	0.0108303		0.0946448	0.56
	TA	LH27-2	#35	51.1046	0.0480565	28.4437	0.887756	bdl	0.0447652	13.0822	3.70295	0.200525	97.531		2.38386	1.56373	0.0346315	0.653847	0.334901	0.0119329		0.653402	0.334673	0.0119248		0.108914	0.56		0.71576	1193.83	4.84007

## Sheet: S1b Pl-rim
	Table S1b. Fedspar: complete dataset for the EMPA, chemical formulae and thermobarometry results of plagioclase phenocrysts rims from LHPCS lavas
	Rock Type	Sample	Spot																							KD pl-liq(An-Ab)	X(An)liq		(H2Oliq)	T (°C)	P (kbar)
		(thin section)		SiO2	TiO2	Al2O3	FeOtot	MnO	MgO	CaO	Na2O	K2O	Total		Si	Al	Fe3+	Ca	Na	K		XAn	XAb	XOr			[eq. 31]		[eq. 25b]	[eq. 24a]	[eq. 25a]
				(wt%)											(apfu)
	TA	LH4	#96	55.7458	0.102927	26.5146	0.864049	bdl	0.146184	10.6781	5.39808	0.352886	99.806		2.52349	1.41459	0.0327103	0.517913	0.47378	0.020379		0.511735	0.468129	0.0201359		0.270337	0.63
	TA	LH4	#99	55.5577	0.0567434	26.4201	0.493362	bdl	0.0648969	10.2537	5.57246	0.368026	98.787		2.53621	1.42145	0.0188348	0.501526	0.493213	0.0214327		0.493545	0.485364	0.0210917		0.29062	0.63
	TA	LH4	#100	55.0415	0.0680343	26.786	0.51674	bdl	0.0648418	10.712	5.30526	0.323143	98.848		2.51404	1.44194	0.0197383	0.524235	0.469824	0.0188293		0.517564	0.463846	0.0185897		0.264847	0.63
	TA	LH4	#103	56.1847	0.112962	25.2118	0.741704	bdl	0.0588973	9.37099	6.05947	0.488435	98.277		2.57707	1.36291	0.0284508	0.460539	0.538876	0.0285807		0.447997	0.524201	0.0278024		0.345786	0.63
	TA	LH4	#104	55.5468	0.105911	26.1882	0.741674	bdl	0.0858848	10.104	5.68199	0.421517	98.876		2.53622	1.40925	0.0283202	0.494304	0.503008	0.0245528		0.483727	0.492245	0.0240275		0.300722	0.63
	TA	LH4	#113	54.7668	0.078855	26.3667	0.746407	bdl	0.0757863	10.4259	5.38133	0.427305	98.269		2.51839	1.42895	0.0287036	0.513678	0.479779	0.025067		0.504336	0.471053	0.0246111		0.276017	0.63
	TA	LH4	#114	54.2584	0.0758702	27.8501	0.634641	bdl	0.0957045	11.5768	4.72274	0.212489	99.451		2.46696	1.49237	0.0241312	0.563969	0.416327	0.0123251		0.568161	0.419422	0.0124167		0.218155	0.63		0.29406	1197.18	6.79444
	TA	LH4	#160	55.6856	0.0869263	26.0845	0.659475	bdl	0.0877207	10.3265	5.45442	0.427854	98.813		2.54274	1.40378	0.0251834	0.505225	0.482897	0.0249237		0.498719	0.476679	0.0246028		0.282459	0.63
	AB	LH5-2	#9	53.2743	0.10134	27.8856	0.536768	0.0566642	0.128779	11.6702	4.60718	0.16819	98.429		2.4492	1.51092	0.0206371	0.574854	0.410666	0.00986428		0.57752	0.41257	0.00991003		0.530096	0.72
	AB	LH5-2	#25	54.1224	0.105354	27.0638	0.670085	bdl	0.125301	11.1787	5.0755	0.221851	98.584		2.48353	1.46365	0.0257145	0.549615	0.451562	0.0129871		0.541939	0.445255	0.0128057		0.609653	0.72
	AB	LH5-2	#43	54.3087	0.109395	27.1545	0.603937	bdl	0.127524	11.4085	4.94503	0.182382	98.84		2.48454	1.46412	0.023106	0.559217	0.438625	0.0106443		0.554512	0.434934	0.0105548		0.582017	0.72
	AB	LH5-2	#63	52.8463	0.108121	27.4	0.556665	bdl	0.133565	11.8725	4.74716	0.147285	97.848		2.44864	1.49629	0.0215705	0.589421	0.426473	0.00870617		0.575269	0.416233	0.00849715		0.536894	0.72
	TA	LH13	#20	58.9136	0.0720747	23.6536	0.624387	bdl	0.0650772	7.45931	6.82563	0.872298	98.486		2.68097	1.26861	0.0237622	0.363704	0.602235	0.0506407		0.357772	0.592413	0.0498148		0.317016	0.54
	TA	LH13	#24	59.3937	0.0916371	23.6085	0.848263	bdl	0.0558701	7.48129	7.05691	0.544812	99.126		2.68341	1.2571	0.0320503	0.362156	0.618169	0.0314016		0.357958	0.611004	0.0310376		0.326795	0.54
	TA	LH13	#49	53.7891	0.067469	26.6496	0.697872	bdl	0.111585	11.5703	5.11431	0.386759	98.387		2.48111	1.44876	0.0269205	0.571833	0.457388	0.0227589		0.543578	0.434788	0.0216343		0.153137	0.54
	TA	LH13	#52	52.8923	0.0405394	26.7153	0.566832	bdl	0.0613648	11.6556	4.46518	0.330293	96.731		2.47581	1.47381	0.0221889	0.584567	0.405239	0.0197234		0.579049	0.401414	0.0195373		0.132721	0.54
	TA	LH13	#57	54.2108	bdl	25.5909	0.442331	bdl	0.0746283	10.7001	5.28332	0.416415	96.737		2.53309	1.40931	0.0172849	0.535703	0.47865	0.0248227		0.515508	0.460605	0.0238869		0.171063	0.54		0.94809	1154.65	6.56853
	TA	LH13	#58	53.6214	bdl	25.5826	0.456664	bdl	0.0426966	10.9358	5.32112	0.312376	96.325		2.51959	1.41675	0.0179451	0.550576	0.484778	0.0187253		0.522329	0.459906	0.0177646		0.168573	0.54		0.95399	1154.01	6.34125
	TA	LH13	#59	52.9872	0.0474909	25.6655	0.496155	bdl	0.0589845	11.292	4.88813	0.329556	95.791		2.50516	1.43011	0.0196172	0.572018	0.448078	0.0198771		0.550031	0.430856	0.0191131		0.149971	0.54		0.82493	1158.82	5.7926
	TA	LH13	#60	52.8133	bdl	25.9183	0.534097	bdl	0.0425384	11.5129	4.85488	0.529504	96.242		2.491	1.44076	0.0210672	0.581818	0.443971	0.0318609		0.550105	0.419771	0.0301242		0.146094	0.54		0.75864	1161.79	5.93328
	TA	LH13	#61	52.52	0.0477181	26.4653	0.594272	bdl	0.0629708	11.8331	4.57402	0.307326	96.421		2.47055	1.46724	0.0233781	0.596402	0.41717	0.0184428		0.577901	0.404229	0.0178706		0.133917	0.54		0.73446	1162.66	5.24685
	TA	LH13	#104	58.5803	0.10619	23.59	1.0711	bdl	bdl	7.79836	6.85787	0.641771	98.68		2.66528	1.26495	0.0407547	0.380161	0.604961	0.0372504		0.371842	0.591723	0.0364352		0.304665	0.54
	TA	LH13	#111	61.11	0.233213	22.5436	1.03506	bdl	bdl	7.22529	6.30815	0.881397	99.354		2.74393	1.19299	0.0388669	0.347607	0.549173	0.0504883		0.366957	0.579744	0.0532988		0.302471	0.54
	TA	LH13	#113	57.6868	0.109613	24.1355	0.948512	bdl	0.0648433	8.37184	6.52541	0.590584	98.47		2.63391	1.29878	0.0362179	0.409561	0.577669	0.0344005		0.400889	0.565438	0.0336722		0.270038	0.54
	TA	LH13	#115	57.7458	0.109969	24.4825	0.924307	bdl	0.0478337	8.69186	6.2818	0.527663	98.819		2.62604	1.31218	0.0351523	0.423514	0.553876	0.0306123		0.420152	0.549479	0.0303693		0.250385	0.54
	TA	LH13	#123	57.837	0.12046	23.7681	0.910791	bdl	0.0512835	8.00212	6.61713	0.668083	97.975		2.65144	1.28418	0.0349181	0.393055	0.588155	0.0390719		0.385242	0.576463	0.0382952		0.286485	0.54
	TA	LH13	#125	58.8064	0.0918277	24.2412	0.911973	bdl	0.0810836	8.06093	6.67971	0.665512	99.542		2.65174	1.2883	0.034391	0.389462	0.583998	0.0382843		0.384941	0.577219	0.0378399		0.287085	0.54
	TA	LH13	#126	59.6615	0.0726133	23.6182	0.794051	bdl	bdl	6.91943	7.24731	0.745867	99.084		2.69452	1.25715	0.029991	0.334835	0.634615	0.0429741		0.330726	0.626827	0.0424468		0.362864	0.54
	TA	LH13	#129	60.5245	0.126721	23.2802	0.960182	0.0647937	0.0639396	6.71799	7.15087	0.661133	99.565		2.71491	1.23074	0.0360191	0.322876	0.621913	0.037833		0.328586	0.632911	0.0385021		0.368771	0.54
	TA	LH13	#131	59.541	0.105472	22.8389	1.00964	bdl	0.0684228	6.50268	6.67408	1.00611	97.757		2.72068	1.22996	0.038582	0.318366	0.591288	0.0586498		0.328787	0.610643	0.0605696		0.355579	0.54
	TA	LH13	#132	59.315	0.10627	23.564	0.71005	bdl	bdl	7.54574	6.68925	0.514696	98.468		2.692	1.26042	0.0269498	0.366931	0.588619	0.0298002		0.372387	0.59737	0.0302433		0.307123	0.54
	TA	LH13	#136	61.5929	0.0920135	22.4429	0.748296	bdl	bdl	5.59027	7.31346	1.36536	99.214		2.76846	1.18889	0.0281279	0.269225	0.637351	0.0782916		0.273361	0.647144	0.0794946		0.453239	0.54
	TA	LH13	#137	58.1667	0.117298	23.8545	1.03801	bdl	bdl	7.97169	6.67622	0.615755	98.507		2.65179	1.28171	0.0395751	0.389393	0.590122	0.0358122		0.383514	0.581214	0.0352716		0.290147	0.54
	TA	LH13	#140	59.8804	0.102729	23.3313	0.73235	bdl	0.0499144	6.7338	6.80036	1.04317	98.674		2.71217	1.24545	0.02774	0.326787	0.597187	0.0602761		0.332016	0.606743	0.0612406		0.349872	0.54
	TA	LH13	#142	59.4008	0.0956009	23.7494	0.76013	bdl	bdl	7.4229	7.17745	0.565935	99.207		2.68162	1.26361	0.0286978	0.359047	0.628235	0.0325934		0.35205	0.615992	0.0319582		0.334992	0.54
	TA	LH13	#152	59.827	0.15311	23.6772	0.743652	bdl	bdl	7.30379	6.90523	0.652246	99.295		2.694	1.25657	0.0280044	0.352389	0.602873	0.0374689		0.354969	0.607287	0.0377432		0.327542	0.54
	TA	LH13	#158	59.3133	0.133148	23.488	0.828045	bdl	bdl	7.29095	6.94544	0.751417	98.776		2.6892	1.25508	0.0313965	0.354183	0.610544	0.043462		0.351306	0.605585	0.043109		0.33003	0.54
	TA	LH13	#163	60.4599	0.203728	22.1643	0.88906	bdl	bdl	6.52344	6.53522	1.08777	97.89		2.7547	1.19019	0.0338761	0.318461	0.577316	0.0632268		0.332075	0.601995	0.0659296		0.347073	0.54		1.05741	1151.26	7.0752
	TA	LH13	#166	59.6162	0.131655	22.3052	0.825531	bdl	bdl	6.96629	6.95078	0.729688	97.591		2.73067	1.20411	0.0316223	0.341884	0.617284	0.0426383		0.341268	0.616171	0.0425614		0.345676	0.54		0.94304	1154.72	6.49244
	TA	LH13	#168	56.7731	0.0785865	24.7698	0.75733	bdl	0.0660873	8.19671	6.10634	0.613401	97.388		2.61583	1.34507	0.0291815	0.40465	0.545499	0.0360553		0.41031	0.55313	0.0365597		0.258094	0.54
	TA	LH15	#22	54.9805	0.0981628	26.3949	0.859147	bdl	0.135255	11.0579	5.07967	0.369533	99		2.51212	1.42137	0.0328289	0.541352	0.450002	0.0215399		0.534461	0.444274	0.0212657		0.398461	0.78
	TA	LH15	#24	53.8838	0.101344	26.8329	0.9588	bdl	0.172345	11.7287	4.63361	0.320904	98.669		2.47562	1.45294	0.0368392	0.577363	0.412754	0.0188087		0.572255	0.409103	0.0186423		0.342684	0.78
	TA	LH15	#25	55.0689	0.13543	25.8031	1.17074	bdl	0.19551	10.6776	5.25846	0.379296	98.689		2.52468	1.39421	0.0448866	0.524499	0.467417	0.0221838		0.517206	0.460919	0.0218754		0.42718	0.78
	TA	LH15	#26	56.8213	0.116919	24.7283	1.10929	bdl	0.121793	9.6352	5.49872	0.631556	98.681		2.59479	1.33088	0.0423633	0.471438	0.486855	0.0367926		0.473766	0.489259	0.0369744		0.495023	0.78
	TA	LH15	#27	55.1545	0.0752437	26.0041	0.852735	bdl	0.106304	10.6201	5.32886	0.361575	98.525		2.52969	1.40567	0.0327082	0.521903	0.473879	0.0211565		0.51321	0.465986	0.0208041		0.43524	0.78
	TA	LH15	#35	52.0631	0.0742492	27.672	0.58769	bdl	0.151729	12.729	4.18543	0.227649	97.714		2.42165	1.51697	0.0228605	0.634378	0.377458	0.0135085		0.618698	0.368128	0.0131746		0.285214	0.78
	TA	LH15	#73	54.3322	0.0967206	26.0237	0.846524	0.059465	0.114498	10.8511	4.87226	0.329009	97.529		2.51701	1.42087	0.0327962	0.538609	0.437628	0.0194444		0.540945	0.439526	0.0195287		0.389477	0.78
	TA	LH15	#77	57.541	0.109932	24.6097	0.923995	bdl	0.110937	8.83264	6.1782	0.511839	98.825		2.61749	1.31938	0.0351506	0.430497	0.544899	0.0297029		0.428313	0.542134	0.0295522		0.606731	0.78
	TA	LH15	#79	56.1496	0.121446	25.5856	1.03431	bdl	0.197239	10.3883	5.49342	0.407265	99.388		2.55176	1.37039	0.0393098	0.505838	0.484043	0.0236118		0.499104	0.477599	0.0232975		0.458694	0.78
	TA	LH15	#112	52.735	0.0523531	27.6302	0.55161	bdl	0.149061	12.8821	4.20722	0.176391	98.384		2.43435	1.50323	0.0212947	0.637154	0.376553	0.0103877		0.622163	0.367694	0.0101433		0.283291	0.78
	TA	LH15	#116	51.2051	0.0448153	28.9812	0.631504	bdl	0.15075	13.9402	3.48887	0.147534	98.59		2.36593	1.57819	0.0244017	0.690127	0.31255	0.00869636		0.682367	0.309035	0.00859856		0.21709	0.78		0.33682	1252.76	9.59122
	TA	LH15	#125	51.7763	0.0518773	27.6842	0.616587	bdl	0.153315	13.0746	4.05829	0.192266	97.625		2.41296	1.52057	0.0240309	0.65286	0.366698	0.0114309		0.633237	0.355676	0.0110873		0.26924	0.78
	TA	LH15	#126	51.9848	0.0445566	27.5485	0.72471	0.0428665	0.159247	13.0282	4.11407	0.21455	97.865		2.41751	1.50989	0.0281846	0.649154	0.370945	0.0127285		0.628521	0.359155	0.0123239		0.273913	0.78
	TA	LH15	#128	47.5741	bdl	30.835	0.610086	bdl	0.117182	16.6768	2.18098	0.0912893	98.125		2.22967	1.70321	0.023912	0.837441	0.198184	0.00545818		0.804394	0.190363	0.00524279		0.11344	0.78		0.51279	1262.01	7.70682
	TA	LH15	#129	53.71	0.0564374	27.4686	0.785122	bdl	0.104414	11.9232	4.53377	0.237372	98.819		2.46196	1.48395	0.0300966	0.585587	0.402932	0.0138808		0.584185	0.401967	0.0138475		0.32983	0.78
	TA	LH17	#199	53.8454	0.0592587	26.1883	0.576304	bdl	0.134551	11.157	4.78188	0.288255	97.045		2.50748	1.43731	0.0224438	0.556685	0.431752	0.0171248		0.553606	0.429364	0.0170301		0.260459	0.65		0.2591	1207.45	8.5332
	TA	LH17	#213	50.691	0.0480308	28.7185	0.528381	bdl	0.130495	13.9519	3.32256	0.141599	97.536		2.36672	1.58028	0.0206309	0.697948	0.30077	0.00843403		0.692991	0.298634	0.00837413		0.144719	0.65		0.00874	1224.26	5.92909
	TA	LH17	#226	53.0073	0.0778637	26.7617	0.770373	bdl	0.117863	11.8071	4.58725	0.299507	97.429		2.46727	1.46808	0.0299873	0.588842	0.413981	0.0177847		0.576952	0.405622	0.0174256		0.2361	0.65		0.16681	1211.3	8.06263
	TA	LH17	#286	57.1935	0.411448	23.4284	1.67543	bdl	0.186844	9.03048	5.27629	0.919664	98.122		2.62684	1.26819	0.064353	0.444398	0.469855	0.053886		0.459023	0.485318	0.0556594		0.355063	0.65
	TA	LH17	#288	56.0286	0.139581	25.165	1.1333	bdl	0.119918	9.8652	5.78978	0.51159	98.753		2.56329	1.35687	0.0433597	0.483578	0.513566	0.0298585		0.470863	0.500063	0.0290734		0.356652	0.65
	TA	LH21-2	#1	59.9454	bdl	22.8862	0.390804	bdl	bdl	6.1563	7.32454	0.850986	97.621		2.73766	1.23184	0.0149259	0.301243	0.648561	0.0495798		0.301429	0.648961	0.0496104		0.628855	0.61
	TA	LH21-2	#2	57.797	bdl	25.0119	0.385925	bdl	bdl	8.50084	6.31372	0.582097	98.662		2.62711	1.33991	0.0146701	0.414008	0.556425	0.0337542		0.412282	0.554105	0.0336134		0.392567	0.61
	TA	LH21-2	#3	57.7761	bdl	25.1484	0.396145	bdl	bdl	8.44165	6.26913	0.539524	98.637		2.62514	1.3467	0.0150527	0.410965	0.552279	0.0312733		0.413231	0.555324	0.0314457		0.392527	0.61
	TA	LH26-2	#168	56.336	bdl	25.321	0.290146	bdl	bdl	8.98745	6.08425	0.490985	97.572		2.59413	1.37417	0.0111732	0.44342	0.543199	0.0288424		0.436668	0.534928	0.0284033		0.218875	0.53		1.3997	1140.83	8.337
	TA	LH26-2	#205	60.2718	bdl	23.244	0.349541	bdl	bdl	6.1733	7.45856	0.8851	98.423		2.73121	1.24139	0.0132463	0.299731	0.655303	0.0511672		0.297883	0.651265	0.0508518		0.390629	0.53
	TA	LH26-2	#226	60.2646	bdl	23.8722	0.434545	bdl	bdl	6.34732	7.35299	0.746063	99.09		2.7119	1.26607	0.0163532	0.306038	0.641537	0.0428297		0.309003	0.647753	0.0432447		0.374541	0.53
	AB	LH27-1	#116	54.8103	0.138702	25.9445	0.71481	bdl	0.192931	10.7479	5.36358	0.172404	98.122		2.52362	1.40787	0.0275238	0.530222	0.478809	0.0101267		0.520255	0.469809	0.00993631		0.677772	0.76
	AB	LH27-1	#117	52.083	0.0926482	27.2638	0.543323	bdl	0.17577	12.462	4.67121	0.117994	97.423		2.43066	1.49958	0.0212051	0.623145	0.422672	0.00702502		0.59187	0.401458	0.00667243		0.509088	0.76
	AB	LH27-1	#118	53.6268	0.104685	26.7512	0.635565	bdl	0.14903	11.1839	5.31305	0.17415	97.959		2.47996	1.45801	0.0245798	0.55415	0.476379	0.0102741		0.532425	0.457703	0.0098713		0.645214	0.76
	AB	LH27-1	#120	53.0744	0.0671711	27.1678	0.624304	bdl	0.188292	11.7367	4.88615	0.14962	97.911		2.45756	1.48262	0.0241753	0.582286	0.438664	0.00883827		0.565442	0.425975	0.00858261		0.565424	0.76
	AB	LH27-1	#30	53.8414	0.112966	27.1112	0.789145	bdl	0.170998	11.235	5.29272	0.150976	98.708		2.47127	1.46659	0.0302912	0.552522	0.471009	0.00884035		0.535197	0.45624	0.00856315		0.63982	0.76
	AB	LH27-1	#32	53.0597	0.119642	27.279	0.56832	bdl	0.166011	11.9269	4.85334	0.127859	98.124		2.45249	1.48603	0.021968	0.590667	0.434941	0.00753932		0.571716	0.420986	0.00729743		0.55267	0.76
	AB	LH27-1	#35	53.5319	0.108825	27.2478	0.482658	bdl	0.153368	11.631	5.00517	0.181432	98.379		2.46537	1.47896	0.0185894	0.573931	0.446925	0.0106596		0.556396	0.43327	0.010334		0.584459	0.76
	AB	LH27-1	#178	55.9163	0.117888	26.717	0.755913	bdl	0.128559	10.2677	5.25807	0.190588	99.352		2.53299	1.42639	0.0286367	0.498356	0.461815	0.0110141		0.513142	0.475517	0.0113409		0.695516	0.76
	AB	LH27-1	#42	55.1717	0.153463	25.7234	0.639657	bdl	0.10765	9.54644	6.04808	0.240557	97.631		2.5475	1.39985	0.0247002	0.472294	0.541454	0.0141701		0.459466	0.526748	0.0137853		0.860455	0.76
	AB	LH27-1	#45	55.1677	0.124061	25.7954	0.754047	bdl	0.11571	10.3827	5.75082	0.208362	98.306		2.53522	1.39711	0.0289792	0.511229	0.512398	0.0122154		0.493539	0.494668	0.0117927		0.752265	0.76
	AB	LH27-1	#48	55.3768	0.142204	25.515	0.693376	bdl	0.117069	9.73358	5.84355	0.236093	97.679		2.55504	1.38746	0.0267543	0.481188	0.522748	0.0138967		0.472757	0.513589	0.0136532		0.815373	0.76
	AB	LH27-1	#73	55.4746	0.124146	25.9645	0.65644	bdl	0.155652	10.0149	5.62636	0.197415	98.214		2.54465	1.40369	0.0251817	0.492212	0.500389	0.0115524		0.490176	0.49832	0.0115047		0.763018	0.76
	AB	LH27-1	#104	54.3224	0.115634	26.0515	0.620679	bdl	0.175035	10.671	5.41078	0.219934	97.587		2.51591	1.42201	0.0240402	0.529535	0.485872	0.0129947		0.51491	0.472454	0.0126358		0.688663	0.76
	AB	LH27-1	#110	53.242	0.0897256	27.1413	0.709514	bdl	0.224478	11.8526	4.7167	0.169733	98.156		2.45895	1.47734	0.0274039	0.586522	0.422358	0.0100005		0.575653	0.414532	0.00981517		0.540475	0.76
	AB	LH27-1	#123	53.0135	0.0788812	27.7827	0.635164	bdl	0.189529	12.1777	4.62972	0.108523	98.649		2.43756	1.50557	0.0244237	0.59994	0.412735	0.00636575		0.58873	0.405023	0.00624681		0.516347	0.76
	AB	LH27-1	#135	55.621	0.127835	25.6233	0.723699	bdl	0.140386	9.71612	5.93236	0.228338	98.133		2.55461	1.387	0.0277972	0.478137	0.528276	0.013379		0.468857	0.518023	0.0131193		0.829253	0.76
	AB	LH27-1	#143	52.957	0.075001	27.6866	0.664472	bdl	0.149481	11.9996	4.77192	0.137088	98.459		2.44012	1.50353	0.0256048	0.592419	0.426313	0.00805836		0.576962	0.41519	0.0078481		0.540105	0.76
	AB	LH27-1	#154	52.3363	0.104165	27.2024	0.806405	bdl	0.193339	12.3767	4.70792	0.131609	97.886		2.43196	1.48976	0.0313374	0.616215	0.42416	0.00780183		0.587892	0.404664	0.00744325		0.516626	0.76
	AB	LH27-1	#178	57.0281	0.203958	24.6723	0.781356	bdl	0.123874	8.71307	6.49719	0.325141	98.345		2.6072	1.32938	0.0298738	0.426805	0.575914	0.0189633		0.417747	0.563692	0.0185609		1.01276	0.76		-0.40384	1256.59	9.06023
	TA	LH27-2	#72	54.2387	0.0414215	27.15	0.616422	bdl	0.0798001	11.407	4.87205	0.288634	98.694		2.48575	1.46648	0.0236256	0.560135	0.43292	0.0168754		0.554627	0.428663	0.0167095		0.164347	0.56		0.93649	1181.28	6.6829
	TA	LH27-2	#73	53.6275	bdl	27.8656	0.63783	bdl	0.104678	11.8793	4.58183	0.240197	98.996		2.45326	1.50238	0.0244015	0.582262	0.406389	0.0140179		0.580712	0.405307	0.0139806		0.148412	0.56		0.85909	1184.57	6.13375
	TA	LH27-2	#74	53.4525	0.0563807	27.8633	0.706576	bdl	0.0701717	11.6922	4.54963	0.248215	98.639		2.45286	1.50692	0.0271156	0.574876	0.404787	0.0145308		0.578233	0.407151	0.0146157		0.149726	0.56		0.86342	1184.37	6.18917
	TA	LH27-2	#75	54.0649	0.0565866	27.4907	0.590399	bdl	0.0894626	11.7323	4.63797	0.258019	98.951		2.47213	1.48149	0.0225765	0.574793	0.411178	0.015051		0.574206	0.410758	0.0150356		0.152112	0.56		0.87439	1183.87	6.27224
	TA	LH27-2	#76	53.7565	bdl	27.6306	0.640799	bdl	0.114119	11.7947	4.64607	0.280045	98.924		2.46109	1.49088	0.0245343	0.578568	0.41241	0.0163562		0.574356	0.409407	0.0162371		0.151572	0.56
	TA	LH27-2	#112	54.358	0.0488893	27.1221	0.700188	bdl	0.0702091	10.8431	5.01456	0.283826	98.462		2.4934	1.46625	0.0268596	0.532909	0.445973	0.0166088		0.535323	0.447993	0.016684		0.177951	0.56
	TA	LH27-2	#113	54.8065	0.0488731	26.746	0.52074	bdl	0.0834642	10.8342	4.99539	0.305898	98.341		2.51416	1.44602	0.0199773	0.532512	0.4443	0.0179017		0.535342	0.446661	0.0179969		0.177416	0.56
	TA	LH27-2	#114	53.4748	0.0451951	27.8038	0.643631	bdl	0.0988175	11.9061	4.62159	0.255375	98.866		2.45091	1.50189	0.0246701	0.584682	0.410693	0.0149319		0.578717	0.406503	0.0147796		0.149363	0.56
	TA	LH27-2	#115	53.594	0.0486836	27.3497	0.636611	bdl	0.0925883	11.3101	4.84672	0.282631	98.161		2.47055	1.48589	0.0245419	0.55862	0.433183	0.0166209		0.553953	0.429565	0.0164821		0.164893	0.56
	TA	LH27-2	#163	54.486	0.0412614	26.686	0.654525	bdl	0.0908475	11.0574	4.9318	0.287518	98.242		2.50528	1.44614	0.0251682	0.54475	0.439666	0.0168653		0.544053	0.439103	0.0168437		0.171621	0.56
	TA	LH27-2	#59	55.4235	0.0559699	25.698	0.382597	bdl	0.0564814	9.77076	5.56599	0.316808	97.28		2.56286	1.40051	0.0147955	0.484097	0.499023	0.018689		0.483223	0.498122	0.0186553		0.219196	0.56
	TA	LH27-2	#63	53.4893	bdl	26.7957	0.526752	bdl	bdl	11.1164	4.74971	0.367161	97.113		2.4899	1.47006	0.0205058	0.554436	0.428676	0.0218037		0.551724	0.426579	0.021697		0.164408	0.56
	TA	LH27-2	#64	54.6939	0.0559041	26.1244	0.435782	bdl	0.090264	10.2224	5.37871	0.305448	97.317		2.53342	1.42617	0.0168808	0.507333	0.48305	0.0180495		0.50309	0.479011	0.0178985		0.202463	0.56
	TA	LH27-2	#81	56.1359	bdl	25.2918	0.476588	bdl	0.0489525	8.83334	5.7573	0.521435	97.13		2.59403	1.37743	0.0184176	0.437354	0.515824	0.0307393		0.444503	0.524255	0.0312418		0.250792	0.56
	TA	LH27-2	#109	54.0459	bdl	27.0572	0.526204	bdl	0.0676869	10.3175	4.93979	0.402071	97.404		2.50133	1.47587	0.0203666	0.511631	0.443266	0.0237394		0.5228	0.452943	0.0242577		0.184227	0.56
	TA	LH27-2	#110	54.6529	0.052358	26.8428	0.592027	bdl	0.0735937	10.355	4.84601	0.324148	97.752		2.51701	1.45698	0.0228018	0.510968	0.432716	0.0190447		0.53075	0.449468	0.019782		0.180076	0.56
	TA	LH27-2	#111	54.089	bdl	27.0656	0.530887	bdl	0.0622023	10.5873	5.01018	0.290748	97.68		2.49782	1.47308	0.0205027	0.523856	0.448593	0.0171288		0.529373	0.453318	0.0173092		0.18209	0.56
	TA	LH27-2	#126	52.7375	0.0558273	27.5423	0.820153	bdl	0.0488259	11.6271	4.57862	0.379641	97.79		2.44594	1.5055	0.031811	0.577791	0.411725	0.0224624		0.570952	0.406851	0.0221966		0.151524	0.56
	TA	LH27-2	#143	54.69	0.052251	26.5044	0.570676	0.0430878	0.0602612	10.1085	5.17637	0.279474	97.485		2.52606	1.44282	0.0220436	0.500259	0.463563	0.0164678		0.510317	0.472884	0.0167989		0.197042	0.56

## Sheet: S1c Pl-gm
	Table S1c. Fedspar: complete dataset for the EMPA, chemical formulae and thermobarometry results of plagioclase microlites from LHPCS lavas
	Rock Type	Sample	Spot																							KD pl-liq(An-Ab)	X(An)liq		(H2Oliq)	T (°C)	P (kbar)
		(thin section)		SiO2	TiO2	Al2O3	FeOtot	MnO	MgO	CaO	Na2O	K2O	Total		Si	Al	Fe3+	Ca	Na	K		XAn	XAb	XOr			[eq. 31]		[eq. 25b]	[eq. 24a]	[eq. 25a]
				(wt%)											(apfu)
	TA	LH4	#167	55.6597	0.113823	26.157	0.907748	bdl	0.0957197	10.0817	5.76563	0.460838	99.253		2.53413	1.40356	0.0345628	0.491806	0.508957	0.0267667		0.478629	0.495321	0.0260496		0.305825	0.63
	TA	LH4	#168	57.1517	0.148473	25.3736	0.86974	bdl	0.053785	9.03081	6.09093	0.567902	99.304		2.59016	1.3553	0.0329643	0.438529	0.535215	0.0328345		0.435663	0.531717	0.0326199		0.360674	0.63
	TA	LH4	#169	58.9668	0.141414	24.1417	0.866294	bdl	0.0848526	7.42164	6.95568	0.680564	99.259		2.66264	1.28478	0.0327135	0.359069	0.608964	0.0392042		0.356489	0.604588	0.0389225		0.501185	0.63
	TA	LH4	#171	54.9515	0.106014	26.7091	0.943319	bdl	0.120356	10.6587	5.28652	0.401836	99.223		2.50491	1.43492	0.0359606	0.520585	0.467228	0.0233679		0.514829	0.462062	0.0231095		0.26523	0.63
	TA	LH4	#172	55.5792	0.109847	26.3991	0.940318	bdl	0.0955615	10.2325	5.33876	0.437743	99.133		2.53015	1.41638	0.0357985	0.499104	0.471218	0.0254221		0.501237	0.473232	0.0255308		0.279007	0.63
	TA	LH4	#173	56.0347	0.110082	26.1671	0.7443	bdl	0.113003	9.80934	5.66824	0.51925	99.166		2.548	1.40234	0.0283039	0.47792	0.499732	0.0301216		0.474233	0.495877	0.0298892		0.309006	0.63
	TA	LH4	#174	55.4525	0.102369	26.5162	0.787755	bdl	0.11287	10.2742	5.513	0.397921	99.164		2.52476	1.42287	0.0299949	0.501213	0.48667	0.0231129		0.495762	0.481377	0.0228615		0.286944	0.63
	TA	LH4	#175	55.7585	0.113879	26.1723	1.04818	bdl	0.11109	10.2359	5.48571	0.470018	99.399		2.53409	1.40187	0.0398384	0.498435	0.483382	0.0272511		0.493956	0.479038	0.0270062		0.286594	0.63
	TA	LH4	#176	56.41	0.136726	25.7616	0.963319	bdl	0.0881508	9.65455	5.77438	0.461302	99.25		2.56198	1.37895	0.0365886	0.469814	0.508478	0.0267279		0.467467	0.505939	0.0265944		0.319839	0.63
	TA	LH4	#219	60.1026	0.191028	23.1329	0.914076	bdl	bdl	6.46399	7.30729	0.912332	99.057		2.71381	1.23104	0.0345163	0.312723	0.63972	0.052553		0.311168	0.63654	0.0522918		0.604526	0.63
	AB	LH5-2	#2	56.3367	0.150116	25.037	0.600842	bdl	0.0587015	8.88141	6.2286	0.431492	97.732		2.59258	1.35793	0.0231236	0.43792	0.555747	0.0253321		0.429755	0.545385	0.0248598		0.941684	0.72
	AB	LH5-2	#21	56.4301	0.158974	25.6383	0.514077	bdl	0.0802136	9.17817	6.21449	0.319142	98.575		2.57522	1.37895	0.0196195	0.448779	0.549865	0.01858		0.44118	0.540554	0.0182654		0.909173	0.72
	AB	LH5-2	#28	56.6905	0.178155	25.2493	0.596638	bdl	0.130056	9.1381	6.42486	0.308425	98.716		2.585	1.35692	0.0227518	0.446456	0.568016	0.0179414		0.432439	0.550183	0.0173782		0.944072	0.72
	AB	LH5-2	#29	58.9434	0.183044	24.0583	0.648261	bdl	0.0404068	7.41836	7.11167	0.469929	98.891		2.66816	1.28351	0.0245405	0.359797	0.624159	0.0271374		0.355849	0.617311	0.0268396		1.28724	0.72
	AB	LH5-2	#30	57.6879	0.163072	24.4797	0.63786	bdl	0.116724	8.24	6.80168	0.431557	98.573		2.62835	1.3145	0.0243041	0.402252	0.600843	0.0250839		0.391227	0.584376	0.0243964		1.10837	0.72
	AB	LH5-2	#26	56.3591	0.158542	25.6843	0.539842	bdl	0.11047	9.35198	5.86664	0.258181	98.329		2.57528	1.3832	0.0206293	0.457866	0.519753	0.0150503		0.461247	0.523592	0.0151614		0.842331	0.72
	AB	LH5-2	#7	60.919	0.23711	22.6409	0.632922	bdl	bdl	5.67034	7.83534	0.841083	98.796		2.7495	1.20434	0.0238895	0.27421	0.685655	0.0484282		0.271955	0.680015	0.0480299		1.85543	0.72
	AB	LH5-2	#9	62.7529	0.130992	21.9038	0.381182	bdl	bdl	4.57639	8.20131	1.20169	99.198		2.81102	1.1564	0.0142797	0.219648	0.712297	0.0686723		0.219512	0.711858	0.06863		2.40635	0.72
	AB	LH5-2	#25	61.0886	0.140851	22.4834	0.390334	bdl	0.0518612	5.15522	7.7816	1.05718	98.149		2.76975	1.20143	0.0148004	0.250438	0.684064	0.061149		0.251532	0.687052	0.0614161		2.02684	0.72
	AB	LH5-2	#33	60.0066	0.144866	23.2676	0.414898	bdl	0.0923305	6.32684	7.59758	0.636122	98.494		2.71859	1.24237	0.0157196	0.307118	0.66737	0.0367658		0.3037	0.659943	0.0363566		1.61245	0.72
	TR	LH6-1	#270	62.7787	0.0798996	21.0775	0.629675	bdl	bdl	4.76782	7.38627	1.42901	98.183		2.83817	1.12305	0.0238066	0.23095	0.647437	0.0824175		0.240372	0.673849	0.0857797		0.172365	0.38
	TR	LH6-1	#273	62.5092	0.0604383	20.9886	0.530017	bdl	bdl	4.69112	7.14413	1.51005	97.448		2.84438	1.1256	0.0201692	0.228714	0.630288	0.0876585		0.241601	0.665802	0.0925977		0.16944	0.38
	TR	LH6-1	#277	62.9713	0.0915981	20.8947	0.686561	bdl	0.13095	4.27091	7.72465	1.6675	98.472		2.8422	1.11148	0.0259147	0.20654	0.675985	0.096014		0.21107	0.69081	0.0981197		0.201234	0.38
	TR	LH6-1	#284	62.8465	0.0915669	20.7585	0.899088	bdl	0.184807	4.49712	7.71314	1.51621	98.534		2.83684	1.10435	0.03394	0.217501	0.675044	0.0873114		0.221973	0.688921	0.0891063		0.190827	0.38
	TR	LH6-1	#286	62.2585	0.0873454	20.1582	1.84792	0.121411	0.668742	4.35366	7.36067	1.69728	98.561		2.81958	1.07596	0.0699882	0.211258	0.646324	0.0980611		0.221064	0.676323	0.102613		0.188107	0.38
	TR	LH6-1	#287	62.115	0.0645679	21.3535	0.587584	bdl	0.0613252	4.90083	7.35719	1.65718	98.122		2.81739	1.1415	0.0222883	0.238174	0.647008	0.0958914		0.242768	0.65949	0.0977414		0.167026	0.38
	TA	LH13	#195	59.1472	0.0872183	23.5511	0.931142	bdl	bdl	6.63413	7.15723	0.800449	98.341		2.69104	1.26285	0.035429	0.323403	0.631362	0.0464599		0.323007	0.63059	0.0464031		0.373765	0.54
	TA	LH13	#203	56.8056	0.0749987	24.438	0.782501	bdl	0.0700078	9.26401	5.86579	0.546124	97.847		2.61215	1.32443	0.0300918	0.456435	0.522974	0.0320374		0.45127	0.517056	0.0316748		0.219364	0.54		1.27532	1145.92	8.1952
	TA	LH13	#206	58.4986	0.1096	23.8455	1.07757	bdl	bdl	7.37058	6.63752	0.650679	98.235		2.66693	1.28123	0.0410835	0.360031	0.586703	0.0378434		0.365671	0.595893	0.0384362		0.311991	0.54
	TA	LH13	#210	56.7834	0.0823927	24.8847	0.872448	bdl	0.0510212	8.22149	6.09219	0.470345	97.458		2.6127	1.34945	0.033571	0.405314	0.543487	0.0276086		0.415107	0.556618	0.0282756		0.25672	0.54
	TA	LH13	#216	58.8633	0.128029	23.7683	0.863658	bdl	bdl	6.84939	6.51108	0.637207	97.645		2.68916	1.27975	0.0329966	0.335272	0.576729	0.0371374		0.353238	0.607635	0.0391275		0.329336	0.54
	TA	LH13	#246	52.0214	0.0443378	27.8943	0.684595	bdl	0.0410144	12.295	3.92902	0.270138	97.183		2.42663	1.53353	0.0267062	0.614502	0.355348	0.0160756		0.623274	0.360421	0.0163051		0.110712	0.54		0.63317	1168.41	4.44611
	TA	LH15	#136	56.7288	0.0990486	25.7554	1.00396	bdl	0.0691988	9.74562	5.67678	0.485176	99.585		2.56718	1.37365	0.0379949	0.472537	0.498083	0.0280099		0.473185	0.498766	0.0280483		0.505262	0.78
	TA	LH15	#139	61.1286	0.361712	21.6176	1.44177	bdl	0.149849	7.30525	5.95287	1.39637	99.354		2.75449	1.14805	0.0543309	0.352699	0.52008	0.0802704		0.370074	0.545701	0.0842248		0.706832	0.78
	TA	LH15	#140	53.4232	0.0825983	27.4748	0.86787	bdl	0.164812	12.1218	4.32892	0.259003	98.723		2.45305	1.48685	0.0333263	0.596372	0.385392	0.0151719		0.598205	0.386576	0.0152185		0.309768	0.78
	TA	LH15	#141	47.7082	0.0483256	31.6065	0.725549	bdl	0.0994101	16.7803	1.91664	0.0810973	98.993		2.21453	1.72911	0.0281651	0.83457	0.172495	0.00480235		0.824782	0.170472	0.00474602		0.0990751	0.78		0.58485	1262.77	7.46158
	TA	LH15	#143	54.0592	0.0935304	26.5302	0.942203	bdl	0.190658	11.3725	4.7273	0.304413	98.23		2.49119	1.44089	0.0363109	0.561522	0.422373	0.0178961		0.560518	0.421618	0.0178641		0.360563	0.78
	TA	LH15	#145	54.7309	0.120485	26.3011	0.880503	bdl	0.142484	11.7255	4.66699	0.324121	98.91		2.50525	1.41888	0.0337058	0.575072	0.414192	0.0189271		0.5704	0.410827	0.0187733		0.345247	0.78
	TA	LH15	#150	56.2916	0.113555	25.1846	1.17457	bdl	0.133692	9.99944	5.70211	0.524474	99.124		2.56562	1.35282	0.0447696	0.488313	0.503885	0.0304952		0.477477	0.492704	0.0298186		0.494634	0.78
	TA	LH15	#151	54.8288	0.0868075	26.5379	0.875836	bdl	0.127592	11.3245	4.91545	0.3071	99.021		2.50491	1.42891	0.0334628	0.554341	0.435405	0.0178987		0.550135	0.432102	0.0177629		0.376502	0.78
	TA	LH15	#152	53.0905	0.0633581	27.0522	0.854805	bdl	0.127874	11.965	4.54444	0.287869	97.986		2.45828	1.47629	0.0331008	0.593607	0.407983	0.0170047		0.58277	0.400535	0.0166943		0.329453	0.78
	TA	LH15	#156	52.5232	0.0894212	27.4154	1.00201	bdl	0.159797	12.4062	4.29452	0.226275	98.145		2.43196	1.49608	0.0388003	0.615484	0.385537	0.013366		0.606755	0.380069	0.0131764		0.300262	0.78
	TA	LH15	#162	60.7224	0.250776	21.476	1.87624	bdl	0.291412	7.29818	6.19414	1.10673	99.226		2.74266	1.14323	0.0708707	0.353192	0.542439	0.0637707		0.368138	0.565393	0.0664693		0.736191	0.78
	TA	LH15	#165	60.8254	0.334802	21.4447	1.36357	bdl	0.11009	6.49401	6.10622	1.18	97.866		2.77142	1.15158	0.0519577	0.317032	0.539432	0.0685893		0.342718	0.583136	0.0741463		0.815612	0.78
	TA	LH15	#175	54.7377	0.086075	26.0202	0.918936	bdl	0.107633	10.7482	5.0845	0.368499	98.095		2.52207	1.41298	0.0354088	0.530614	0.454219	0.0216604		0.527191	0.451289	0.0215206		0.410334	0.78
	TA	LH15	#178	58.8221	0.177686	23.1102	1.36016	bdl	0.110638	8.31785	6.04863	0.726682	98.674		2.67559	1.23891	0.0517397	0.405381	0.533437	0.0421679		0.413238	0.543776	0.0429852		0.630769	0.78
	TA	LH15	#179	58.1849	0.191982	23.4772	1.16472	0.0401158	0.0987675	8.69445	5.7423	0.701371	98.303		2.65744	1.26374	0.0444868	0.42547	0.508495	0.0408658		0.436455	0.521624	0.0419209		0.572886	0.78
	TA	LH15	#184	58.4334	0.173175	23.3303	1.06662	bdl	0.0664838	8.39654	6.02614	0.650378	98.143		2.67029	1.25653	0.0407628	0.411122	0.533929	0.0379159		0.418246	0.543181	0.0385729		0.622533	0.78
	TA	LH15	#190	55.5241	0.0874825	26.385	0.86212	bdl	0.105555	10.996	5.34324	0.383496	99.687		2.51996	1.41132	0.0327217	0.534714	0.47018	0.022204		0.520607	0.457775	0.0216182		0.421495	0.78
	TA	LH17	#324	53.6076	0.0926429	26.1601	1.00659	bdl	0.108448	11.3531	4.65944	0.391107	97.379		2.494	1.43439	0.0391632	0.565922	0.420292	0.0232127		0.560637	0.416367	0.0229959		0.249407	0.65
	TA	LH17	#325	52.4213	0.099312	26.5811	0.853555	bdl	0.0835164	11.9944	4.41653	0.32965	96.786		2.45921	1.46966	0.0334869	0.602894	0.401713	0.0197287		0.588571	0.392169	0.01926		0.261963	0.65
	TA	LH17	#327	55.2493	0.140796	24.3897	1.11641	bdl	0.45429	9.92071	5.22364	0.570187	97.065		2.57029	1.33727	0.0434346	0.494506	0.471168	0.0338401		0.494746	0.471397	0.0338565		0.319977	0.65
	TA	LH17	#329	57.9599	0.238767	23.2462	1.33552	bdl	0.105415	8.00132	5.60418	0.899681	97.391		2.66809	1.26119	0.0514137	0.394645	0.500186	0.0528347		0.416439	0.527808	0.0557525		0.425636	0.65
	TA	LH17	#330	52.935	0.0893403	27.2338	0.749994	bdl	0.125844	12.1389	4.32818	0.267773	97.882		2.45257	1.48711	0.0290598	0.602601	0.388804	0.0158272		0.598274	0.386012	0.0157135		0.216678	0.65
	TA	LH17	#331	54.3715	0.101228	26.3401	0.896995	bdl	0.115395	11.0572	5.09807	0.349271	98.344		2.5029	1.42904	0.0345317	0.545368	0.455014	0.0205113		0.534207	0.445702	0.0200916		0.280188	0.65
	TA	LH17	#332	54.1085	0.0976858	26.7246	0.939456	0.0467121	0.11564	11.5449	4.80865	0.316785	98.703		2.48413	1.44603	0.0360696	0.567902	0.428035	0.0185538		0.55979	0.421921	0.0182888		0.253116	0.65
	TA	LH17	#333	57.4615	0.132487	24.4247	1.10653	0.0739556	0.0974082	8.72166	6.14292	0.662875	98.824		2.61706	1.31106	0.0421459	0.425608	0.54245	0.0385148		0.422829	0.538907	0.0382633		0.42802	0.65
	TA	LH17	#334	54.3626	0.396326	24.9896	1.41923	bdl	0.226139	10.7497	4.73917	0.596215	97.479		2.52689	1.36899	0.0551688	0.535371	0.427105	0.0353547		0.536535	0.428034	0.0354315		0.267913	0.65
	TA	LH17	#335	53.5841	0.107274	25.8301	1.16449	bdl	0.095189	11.138	4.92665	0.375141	97.221		2.49889	1.41969	0.0454155	0.556534	0.445461	0.0223185		0.543324	0.434887	0.0217887		0.268802	0.65
	TA	LH17	#337	55.0207	0.13179	25.9207	1.09393	bdl	0.102595	10.8117	5.29838	0.41517	98.795		2.52136	1.39995	0.0419232	0.530854	0.47076	0.0242713		0.51746	0.458882	0.0236589		0.297809	0.65
	TA	LH17	#344	56.4129	0.116503	24.6955	0.909288	bdl	0.100502	9.63789	5.84222	0.494142	98.219		2.58971	1.33612	0.0349084	0.474054	0.519993	0.028939		0.463402	0.508309	0.0282887		0.36837	0.65
	TA	LH17	#353	56.9912	0.215605	23.5185	1.0064	bdl	0.0844044	8.69547	5.75423	0.813161	97.079		2.64022	1.2841	0.0389906	0.431617	0.516852	0.0480582		0.433121	0.518653	0.0482257		0.402145	0.65
	TA	LH17	#355	54.8376	0.145382	25.0405	1.3311	bdl	0.385586	10.6172	5.07618	0.459372	97.9		2.53577	1.36468	0.0514753	0.526033	0.455109	0.0270991		0.521734	0.451389	0.0268776		0.290547	0.65
	TA	LH17	#356	55.4186	0.138306	25.2883	1.16665	bdl	0.135798	10.0533	5.26996	0.451819	97.926		2.554	1.37354	0.0449638	0.496416	0.470889	0.0265637		0.499478	0.473794	0.0267275		0.318557	0.65
	TA	LH17	#357	56.3899	0.172321	24.5016	1.09169	bdl	0.0661561	9.18094	5.90342	0.61404	97.92		2.59601	1.3294	0.0420302	0.452862	0.526934	0.0360629		0.445792	0.518708	0.0354999		0.390755	0.65
	TA	LH17	#366	57.5901	0.291882	23.047	1.63914	bdl	0.317207	8.84792	5.37878	0.96199	98.084		2.64459	1.24732	0.0629479	0.435335	0.478895	0.0563558		0.448528	0.493408	0.0580637		0.369429	0.65
	TA	LH17	#382	59.7596	0.287701	21.9665	1.59348	bdl	0.729645	7.60063	5.73497	1.17628	98.873		2.71086	1.1744	0.060451	0.369423	0.504404	0.0680719		0.392211	0.535518	0.072271		0.458532	0.65
	TA	LH17	#26	55.5278	0.189686	24.2789	1.47863	bdl	0.198926	9.62967	5.73278	0.425438	97.475		2.57405	1.32645	0.0573221	0.478289	0.515251	0.0251595		0.46951	0.505792	0.0246976		0.361778	0.65
	TA	LH17	#41	55.7655	0.152477	24.2503	1.17409	bdl	0.135106	9.59736	5.72642	0.554768	97.356		2.58632	1.32553	0.0455378	0.476915	0.514928	0.0328236		0.465434	0.502532	0.0320334		0.362593	0.65
	TA	LH17	#49	51.7678	0.0847749	27.2433	0.852013	0.0589191	0.102288	12.8836	3.94954	0.291216	97.237		2.42267	1.50262	0.0333455	0.64602	0.358367	0.0173864		0.632254	0.35073	0.0170159		0.186293	0.65		0.02296	1219.07	7.02363
	AB	LH18	#208	53.6602	0.102182	28.0088	0.527615	bdl	0.229147	11.9612	4.64695	0.111571	99.251		2.4476	1.50569	0.0201261	0.584566	0.410962	0.00649229		0.583387	0.410133	0.0064792		0.497851	0.72
	AB	LH18	#217	53.7023	0.101793	27.4255	0.532385	bdl	0.241589	11.9923	4.75355	0.151158	98.904		2.46019	1.48076	0.0203966	0.588642	0.422222	0.00883418		0.577271	0.414065	0.00866352		0.50795	0.72
	AB	LH18	#225	53.3037	0.112955	27.7838	0.633286	0.046812	0.207077	12.241	4.44352	0.139861	98.912		2.44274	1.50061	0.0242703	0.601048	0.394815	0.00817664		0.59863	0.393226	0.00814374		0.465174	0.72
	AB	LH18	#226	53.5714	0.105848	27.8156	0.642625	bdl	0.179296	12.16	4.65052	0.133735	99.259		2.44657	1.49716	0.0245437	0.595021	0.411788	0.00779164		0.586458	0.405862	0.00767951		0.490086	0.72
	TA	LH21-2	#41	54.7159	0.12359	26.0417	0.751184	bdl	0.111491	10.4511	5.41369	0.428391	98.037		2.52316	1.41533	0.028969	0.516376	0.48403	0.0252018		0.503483	0.471944	0.0245725		0.273793	0.61
	TA	LH21-2	#42	55.5377	0.153712	25.1838	0.913835	bdl	0.109717	9.90674	5.73501	0.548211	98.103		2.55818	1.36716	0.0352019	0.48893	0.512182	0.0322143		0.473162	0.495663	0.0311754		0.30598	0.61
	TA	LH21-2	#43	54.1381	0.104207	26.2087	0.900462	bdl	0.12206	10.6077	5.04337	0.414736	97.546		2.50922	1.43165	0.0349025	0.526781	0.453213	0.0245226		0.524412	0.451175	0.0244123		0.251298	0.61		0.3303	1193.92	7.77896
	TA	LH21-2	#44	54.4633	0.115933	26.119	0.945207	bdl	0.11888	10.8116	5.07806	0.405729	98.091		2.51205	1.41983	0.0364592	0.534302	0.454118	0.0238736		0.527813	0.448603	0.0235837		0.248255	0.61		0.31885	1194.25	7.69307
	TA	LH21-2	#45	56.3334	0.124443	25.0904	0.895437	bdl	0.114164	9.36373	6.04652	0.48916	98.474		2.5792	1.35389	0.0342854	0.459347	0.536749	0.0285712		0.448289	0.523828	0.0278834		0.341308	0.61
	TA	LH21-2	#46	55.0294	0.127239	25.6686	0.844866	bdl	0.117072	10.1096	5.54754	0.472199	97.933		2.53891	1.39576	0.0325985	0.499756	0.49625	0.0277931		0.488139	0.484714	0.027147		0.29004	0.61
	TA	LH21-2	#47	60.547	0.164743	23.0458	0.806356	bdl	0.0444617	6.26416	7.32768	1.05945	99.267		2.7264	1.22305	0.0303655	0.302227	0.639751	0.0608607		0.301372	0.63794	0.0606884		0.618292	0.61
	TA	LH21-2	#55	56.1184	0.136074	25.6219	0.764942	bdl	0.10871	9.86328	5.66914	0.46579	98.772		2.56175	1.37848	0.0292023	0.482422	0.50176	0.0271257		0.477028	0.49615	0.0268224		0.303799	0.61
	TA	LH21-2	#58	53.9598	0.0755878	27.4883	0.761453	bdl	0.0991621	11.8229	4.73595	0.280778	99.238		2.4641	1.47942	0.0290796	0.578476	0.419317	0.0163573		0.570405	0.413466	0.016129		0.211726	0.61		0.1835	1199.05	6.7114
	TA	LH21-2	#70	56.0854	0.151496	25.782	0.776692	bdl	0.116571	10.016	5.56146	0.51585	99.027		2.55509	1.3843	0.0295912	0.488903	0.491239	0.0299805		0.484004	0.486316	0.0296801		0.293486	0.61
	TA	LH21-2	#71	59.5227	0.153401	23.9695	0.827855	bdl	0.0541812	7.66771	6.62826	0.856998	99.701		2.67542	1.26977	0.0311186	0.369274	0.577638	0.0491414		0.370737	0.579927	0.0493361		0.456903	0.61
	TA	LH21-2	#74	55.8712	0.146995	25.8715	0.674628	bdl	0.119812	9.88291	5.45125	0.426688	98.445		2.55599	1.39492	0.0258102	0.484428	0.48352	0.0249023		0.487916	0.487002	0.0250816		0.291542	0.61
	TA	LH21-2	#76	55.3915	0.131567	25.7906	0.845264	bdl	0.100525	10.1178	5.46735	0.498692	98.37		2.54267	1.39529	0.0324486	0.497631	0.486599	0.0292037		0.491035	0.480149	0.0288166		0.285614	0.61
	TA	LH21-2	#77	58.1142	0.163067	24.208	0.815209	bdl	0.0612306	7.84308	6.6632	0.760234	98.645		2.64526	1.29868	0.0310322	0.382514	0.588053	0.0441462		0.376967	0.579527	0.0435061		0.449041	0.61
	TA	LH21-2	#78	55.8031	0.116907	25.7199	0.729276	bdl	0.133198	10.0287	5.5728	0.451385	98.572		2.5536	1.38714	0.0279089	0.491717	0.494443	0.0263512		0.485641	0.488333	0.0260256		0.293709	0.61
	TA	LH26-1	#163	51.4394	0.0523657	28.9451	0.733414	bdl	0.050957	13.0533	4.0399	0.260239	98.595		2.37571	1.57553	0.0283271	0.645936	0.361755	0.015333		0.631398	0.353614	0.0149879		0.100064	0.53
	TA	LH26-1	#164	53.5733	0.0564603	27.5615	0.731272	bdl	bdl	11.9228	4.6539	0.379506	98.892		2.45718	1.48987	0.0280494	0.585922	0.413859	0.0222058		0.573316	0.404956	0.0217281		0.126202	0.53		0.72453	1161.58	5.18408
	TA	LH26-1	#165	53.3889	bdl	27.8225	0.636819	bdl	bdl	11.1928	4.68553	0.388744	98.199		2.45933	1.51049	0.0245323	0.552431	0.418477	0.0228449		0.555904	0.421108	0.0229885		0.135346	0.53		0.77705	1159.36	5.53084
	TA	LH26-1	#7	53.6829	0.0579995	26.0281	0.983725	bdl	bdl	10.095	5.22994	0.451897	100		2.51248	1.4357	0.0385032	0.50623	0.474581	0.0269814		0.502315	0.470912	0.0267728		0.1675	0.53		0.99458	1151.91	6.70056
	TA	LH26-1	#9	52.9884	0.0411215	26.6253	0.776714	0.047474	0.0746951	10.9989	4.89448	0.375812	99.997		2.47851	1.46778	0.0303828	0.55123	0.443878	0.0224254		0.541732	0.436229	0.022039		0.143874	0.53		0.83833	1156.94	5.79945
	TA	LH26-2	#236	55.7929	0.137842	24.6874	1.16944	bdl	0.360911	9.34214	5.42858	0.494233	97.417		2.57952	1.34521	0.045216	0.462784	0.486623	0.0291507		0.472925	0.497286	0.0297895		0.187874	0.53		1.1437	1147.8	7.42828
	TA	LH26-2	#237	54.7173	0.119897	26.1224	1.08851	bdl	0.228751	10.6398	4.94655	0.382186	98.256		2.5164	1.41587	0.0418645	0.524278	0.441067	0.0224228		0.53077	0.446529	0.0227004		0.150313	0.53		0.88143	1155.39	6.03248
	TA	LH26-2	#238	57.6625	0.359322	23.2028	1.86507	0.0565074	0.266289	8.50048	5.32339	0.869521	98.113		2.64318	1.25351	0.0714966	0.417493	0.473116	0.0508477		0.443454	0.502536	0.0540096		0.202475	0.53		1.17307	1150.24	8.51471
	TA	LH26-2	#241	53.5671	0.0865715	27.5732	0.903924	0.0501398	0.115851	11.6795	4.68597	0.199738	98.862		2.45489	1.48928	0.0346435	0.5735	0.416371	0.0116776		0.572613	0.415727	0.0116595		0.129718	0.53		0.78555	1158.87	5.06975
	TA	LH26-2	#242	54.2165	0.0716817	27.2905	0.858517	bdl	0.0647224	11.2167	4.98081	0.213549	98.913		2.47928	1.47083	0.0328321	0.549581	0.441611	0.012458		0.547582	0.440005	0.0124127		0.143569	0.53		0.87349	1155.21	5.5586
	TA	LH26-2	#244	56.5351	0.171791	25.868	1.20522	bdl	0.140615	9.94299	5.58948	0.481694	99.952		2.55264	1.37654	0.0455087	0.481018	0.489316	0.027746		0.481943	0.490257	0.0277994		0.181753	0.53		1.10233	1148.75	7.18448
	TA	LH26-2	#245	54.5493	0.0909441	27.2221	0.770274	bdl	0.103247	11.4895	4.88807	0.270346	99.391		2.4836	1.46073	0.0293287	0.560491	0.431496	0.0157026		0.556214	0.428203	0.0155827		0.13755	0.53		0.82029	1157.43	5.43031
	TA	LH26-2	#246	57.1539	0.182286	24.87	1.34922	bdl	0.419641	9.53381	5.28772	0.615767	99.416		2.58901	1.32776	0.0511124	0.462729	0.464411	0.0355846		0.480645	0.482392	0.0369624		0.17932	0.53		1.04911	1151.3	7.3392
	TA	LH26-2	#250	52.1666	0.066671	27.5353	0.696281	bdl	0.140167	12.1979	4.33964	0.240231	97.4		2.43137	1.51253	0.0271393	0.609142	0.392157	0.0142839		0.599795	0.38614	0.0140647		0.115026	0.53		0.69298	1163.38	4.6144
	TA	LH26-2	#251	53.6426	0.118611	26.2586	0.850137	bdl	0.183283	10.8666	4.90357	0.371531	97.209		2.49682	1.44047	0.0330919	0.541929	0.442523	0.0220613		0.538422	0.43966	0.0219185		0.145897	0.53		0.85295	1156.39	5.86499
	TA	LH26-2	#252	54.0464	0.0896001	26.4481	0.866344	bdl	0.143163	10.8742	5.07799	0.30157	97.858		2.49834	1.4409	0.0334913	0.538586	0.455118	0.0177841		0.532469	0.449949	0.0175821		0.150981	0.53		0.90586	1154.23	5.93082
	TA	LH26-2	#256	53.9523	0.0939618	27.0627	0.787664	bdl	0.134645	11.3142	4.97074	0.248199	98.568		2.47798	1.46492	0.0302541	0.556779	0.442645	0.0145427		0.54911	0.436548	0.0143424		0.142045	0.53		0.85545	1155.98	5.55325
	AB	LH27-1	#105	61.9199	0.137568	21.6571	0.910823	bdl	bdl	4.71081	8.33911	0.856188	98.545		2.79589	1.15252	0.0343938	0.227908	0.730057	0.0493194		0.22626	0.724778	0.0489628		2.40423	0.76
	AB	LH27-1	#114	63.0017	0.145992	21.3496	0.653103	bdl	bdl	3.98906	8.59715	1.03975	98.823		2.82962	1.13011	0.0245309	0.191964	0.748647	0.0595751		0.191928	0.748508	0.059564		2.92709	0.76
	AB	LH27-1	#131	60.2354	0.109916	22.313	0.736362	bdl	0.0478107	5.56384	8.1874	0.672669	97.87		2.7472	1.19936	0.0280857	0.271885	0.723987	0.0391379		0.262688	0.699497	0.0378141		1.99859	0.76
	AB	LH27-1	#3	59.097	0.21716	23.525	0.644223	bdl	0.0845821	7.18669	7.55576	0.39311	98.718		2.6811	1.25786	0.0244422	0.349341	0.664619	0.022752		0.33697	0.641084	0.0219463		1.42791	0.76
	AB	LH27-1	#14	61.9148	0.13748	21.6214	0.735062	bdl	bdl	4.51209	8.49527	0.927695	98.393		2.79979	1.15231	0.0277978	0.218616	0.744826	0.0535174		0.21497	0.732405	0.0526249		2.55713	0.76
	AB	LH27-1	#16	60.5239	0.126088	22.8664	0.728567	bdl	0.0404856	5.62758	8.11868	0.597003	98.636		2.73669	1.21857	0.0275501	0.272642	0.711755	0.0344377		0.267602	0.698597	0.033801		1.95937	0.76
	AB	LH27-1	#40	59.5128	0.167965	23.6179	0.848078	bdl	0.0520056	6.606	7.50854	0.551445	98.872		2.69151	1.25888	0.0320758	0.320109	0.658399	0.0318161		0.316838	0.651671	0.031491		1.54372	0.76
	AB	LH27-1	#41	60.2508	0.14556	22.9463	1.24032	bdl	0.144958	6.10168	7.81974	0.57593	99.229		2.71479	1.21855	0.0467373	0.294575	0.683144	0.0331056		0.29142	0.675828	0.0327511		1.74058	0.76
	AB	LH27-1	#50	57.5714	0.193068	24.4677	0.783142	bdl	0.0840451	8.18817	6.80724	0.312491	98.414		2.62618	1.31543	0.0298755	0.400201	0.602056	0.0181851		0.392184	0.589995	0.0178208		1.12911	0.76
	AB	LH27-1	#62	59.1884	0.19384	23.428	0.817044	bdl	0.0709573	6.59864	7.57029	0.582664	98.46		2.69023	1.255	0.0310566	0.321351	0.667132	0.0337854		0.314351	0.652599	0.0330494		1.55815	0.76
	AB	LH27-1	#67	62.7346	0.123656	21.8437	0.608243	bdl	bdl	4.68234	8.65166	0.795174	99.479		2.80381	1.1506	0.0227339	0.224221	0.7497	0.0453379		0.219985	0.735534	0.0444813		2.50951	0.76
	AB	LH27-1	#169	63.0865	0.159294	22.2448	0.856158	bdl	0.147027	4.90139	7.98713	0.769706	100.152		2.79581	1.16187	0.0317309	0.232736	0.686293	0.0435166		0.241792	0.712998	0.0452099		2.21322	0.76
	AB	LH27-1	#8	56.9256	0.180574	24.5764	0.751175	0.046772	0.0702324	8.32712	6.65521	0.317192	97.861		2.61328	1.3297	0.0288387	0.409587	0.592362	0.0185763		0.401349	0.580448	0.0182026		1.08547	0.76
	AB	LH27-1	#13	59.2923	0.174352	23.1115	0.828415	bdl	0.0592858	6.76129	7.48166	0.480483	98.196		2.70056	1.24062	0.0315543	0.329957	0.660693	0.0279185		0.323942	0.648649	0.0274095		1.50287	0.76
	AB	LH27-1	#14	57.8211	0.180296	23.6348	0.804073	bdl	0.060648	7.55749	7.0355	0.400862	97.536		2.65814	1.28056	0.0309131	0.372256	0.627094	0.0235095		0.363937	0.613079	0.0229841		1.26436	0.76
	AB	LH27-1	#16	59.3668	0.184607	22.6312	1.00981	bdl	0.171086	6.20491	7.4221	0.570894	97.565		2.71774	1.22103	0.0386599	0.304349	0.658775	0.0333409		0.305429	0.661112	0.0334592		1.62459	0.76
	AB	LH27-1	#19	57.5145	0.203799	24.2435	0.950474	bdl	0.0933095	8.22407	6.6444	0.313761	98.208		2.62916	1.30615	0.0363359	0.40281	0.588901	0.0182977		0.398818	0.583066	0.0181164		1.09729	0.76
	AB	LH27-1	#30	58.617	0.200397	23.3596	0.850216	bdl	0.0438798	7.25192	7.31833	0.450338	98.112		2.67747	1.25754	0.0324778	0.354918	0.648127	0.0262421		0.344819	0.629686	0.0254954		1.3706	0.76
	AB	LH27-1	#32	57.6348	0.173302	23.9462	0.772601	bdl	0.0741365	7.84466	7.00254	0.439828	97.888		2.64353	1.29447	0.0296354	0.38552	0.622733	0.025736		0.372847	0.602263	0.02489		1.21237	0.76
	AB	LH27-1	#38	57.4694	0.177084	24.3858	0.562553	bdl	0.0817469	8.01723	6.78531	0.339895	97.819		2.63428	1.3174	0.0215647	0.393751	0.603033	0.0198759		0.387299	0.593151	0.0195502		1.14947	0.76
	AB	LH27-1	#52	58.8422	0.197142	23.5503	1.06391	0.0505023	0.0841685	6.90402	7.20847	0.487308	98.388		2.67715	1.26281	0.0404804	0.336558	0.635879	0.0282844		0.336315	0.635421	0.028264		1.41806	0.76
	AB	LH27-1	#61	58.3452	0.192595	23.4173	0.808399	bdl	0.371562	7.22434	7.18323	0.389659	97.939		2.66862	1.26233	0.0309216	0.35404	0.637012	0.0227365		0.349225	0.628348	0.0224273		1.35044	0.76
	AB	LH27-1	#80	60.1934	0.179443	22.9903	0.879107	0.0440773	bdl	6.11378	7.77921	0.569534	98.785		2.72113	1.2249	0.0332352	0.29613	0.68184	0.0328457		0.292962	0.674544	0.0324942		1.72814	0.76
	AB	LH27-1	#83	62.2139	0.184853	21.8283	0.914454	bdl	0.112702	5.10438	8.23076	0.810632	99.4		2.78712	1.15251	0.0342599	0.24501	0.714915	0.0463287		0.243487	0.710472	0.0460408		2.19003	0.76
	AB	LH27-1	#91	59.4618	0.13676	23.1763	0.628708	bdl	0.0555874	6.81138	7.5562	0.495018	98.342		2.70376	1.24202	0.0239076	0.331847	0.666163	0.0287151		0.323209	0.648823	0.0279676		1.50668	0.76
	AB	LH27-1	#95	58.3768	0.200227	23.5857	0.961627	bdl	0.0762478	7.34654	7.11571	0.40986	98.087		2.66684	1.26987	0.0367383	0.359594	0.630264	0.0238864		0.354719	0.621719	0.0235626		1.31549	0.76
	AB	LH27-1	#109	61.064	0.149477	22.4434	0.720492	bdl	0.0734876	6.38235	7.67854	0.607901	99.145		2.74841	1.19053	0.0271195	0.307787	0.670073	0.034905		0.303908	0.661627	0.0344651		1.63399	0.76
	AB	LH27-1	#132	57.2615	0.188431	24.2735	0.905037	bdl	0.110289	8.11696	6.81757	0.357749	98.031		2.62438	1.31115	0.0346886	0.398594	0.605816	0.0209171		0.388748	0.590851	0.0204004		1.14075	0.76
	AB	LH27-1	#138	57.8577	0.173113	23.6799	0.619437	bdl	0.391166	7.88101	6.73209	0.339496	97.688		2.65398	1.28018	0.0237624	0.38734	0.598734	0.0198669		0.385052	0.595198	0.0197496		1.16017	0.76
	AB	LH27-1	#147	58.5804	0.171348	24.1852	0.61647	bdl	0.0787718	7.48213	7.18082	0.437796	98.733		2.65787	1.29327	0.0233911	0.363731	0.631688	0.0253403		0.356334	0.618842	0.024825		1.30347	0.76
	TA	LH27-2	#158	54.8555	0.0857618	25.8874	0.982668	bdl	0.0846641	9.9604	5.22223	0.529851	97.612		2.53607	1.41054	0.037993	0.493391	0.468105	0.0312503		0.496996	0.471526	0.0314786		0.201743	0.56		1.11875	1176.03	8.14248
	TA	LH27-2	#160	52.3461	0.0481165	27.839	0.68579	0.0558783	bdl	11.8513	4.10676	0.277157	97.251		2.43715	1.52759	0.0267021	0.591205	0.370718	0.016462		0.604266	0.378908	0.0168256		0.133337	0.56		0.77617	1188.69	5.73134

## Sheet: S1d - Afs pheno
	Table S1d. Fedspar: complete dataset for the EMPA, chemical formulae and thermobarometry results of alkali-feldspar phenocrysts from LHPCS lavas
	Rock Type	Sample	Spot																							KD pl-liq(An-Ab)	T (°C)
		(thin section)		SiO2	TiO2	Al2O3	FeOtot	MnO	MgO	CaO	Na2O	K2O	Total		Si	Al	Fe3+	Ca	Na	K		XAn	XAb	XOr			[eq. 24b]
				(wt%)											(apfu)
	TA	LH4	#90	63.2305	0.305664	20.3496	1.04129	bdl	0.100249	3.71234	7.43079	2.81827	99.026		2.85179	1.08169	0.0392751	0.179395	0.649789	0.162156		0.180962	0.655465	0.163572		1.0704
	TR	LH5-1	#66	64.2317	0.0684936	19.9167	0.444933	bdl	bdl	2.79425	7.33401	3.42824	98.256		2.90851	1.06291	0.0168489	0.135569	0.643888	0.19804		0.13869	0.658711	0.202599		0.432652	494.453
	TR	LH5-1	#67	64.5617	0.0876996	19.7533	0.360108	bdl	bdl	2.71166	7.33431	3.61516	98.457		2.91819	1.05229	0.0136122	0.131325	0.642754	0.208461		0.133659	0.654176	0.212165		0.445847	494.034
	TA	LH13	#32	70.0745	0.224306	16.6803	0.730474	bdl	bdl	1.85434	6.74861	3.23112	99.554		3.08878	0.866535	0.026927	0.0875767	0.57675	0.181693		0.103516	0.681722	0.214762		1.26085
	TA	LH13	#117	64.8782	0.143038	20.5724	0.545913	bdl	bdl	4.29623	7.406	1.85315	99.706		2.88342	1.07758	0.0202903	0.204583	0.638175	0.10507		0.215844	0.673302	0.110854		0.597219
	TA	LH13	#128	67.6929	0.12552	17.1217	0.400275	bdl	bdl	0.544735	5.30937	7.827	99.033		3.05808	0.911608	0.0151224	0.0263672	0.465046	0.451087		0.0279759	0.493417	0.478607		3.37672
	TA	LH13	#130	68.0292	0.160201	16.6902	0.470013	bdl	bdl	1.36298	5.49148	7.08656	99.306		3.06227	0.885452	0.0176935	0.0657373	0.479275	0.406951		0.0690544	0.50346	0.427486		1.39584
	TA	LH13	#139	62.5725	0.110798	21.2558	0.865984	bdl	0.0655444	4.26471	7.61427	2.01843	98.768		2.82317	1.13028	0.0326753	0.206166	0.666083	0.116179		0.208579	0.673882	0.117539		0.618552
	TA	LH15	#107	63.9711	0.492059	19.4342	1.31744	bdl	0.0750608	2.75281	7.2319	3.79414	99.076		2.8882	1.03411	0.0497429	0.133166	0.633057	0.218532		0.135228	0.642857	0.221915		2.27877
	TA	LH15	#108	64.1115	0.678932	19.2361	1.84227	bdl	0.0846798	2.91067	7.3011	2.88988	99.066		2.88561	1.02041	0.0693446	0.140368	0.637144	0.165936		0.148782	0.675335	0.175883		2.17581
	TA	LH26-2	#206	68.0818	0.0768769	17.9135	0.404506	bdl	bdl	0.966062	6.83586	4.8365	99.138		3.03881	0.942346	0.0150992	0.046201	0.591579	0.275399		0.0505936	0.647824	0.301583		2.28778
	AB	LH27-1	#172	65.4323	2.54858	13.4877	5.30761	0.0888212	0.117753	0.491504	5.59613	5.27688	98.372		2.99399	0.727365	0.203101	0.0240968	0.49647	0.308031		0.0290814	0.599169	0.371749		15.4637
	AB	LH27-1	#174	66.2013	0.279518	15.3349	3.02028	0.0761238	0.0808609	0.531131	6.20715	5.90676	97.638		3.03862	0.829556	0.115935	0.0261207	0.552394	0.345874		0.0282572	0.597578	0.374165		15.8724
	TA	LH27-2	#84	64.9677	0.339005	18.1143	1.65332	bdl	0.0836253	4.16222	5.87891	2.72952	97.946		2.94323	0.967173	0.0626384	0.202034	0.516382	0.157751		0.230589	0.589364	0.180047		0.543489
	TA	LH27-2	#85	64.7041	0.244724	19.6847	1.06962	bdl	0.0578814	4.16624	6.5703	2.56798	99.09		2.89981	1.03973	0.0400889	0.200058	0.570913	0.146821		0.217978	0.622051	0.159972		0.60682
	TA	LH27-2	#48	64.5489	0.25578	18.8332	0.927005	bdl	0.0986921	3.95044	6.27347	2.41744	97.325		2.93456	1.0091	0.0352446	0.19243	0.552979	0.140206		0.217284	0.624401	0.158315		0.611057

## Sheet: S1e - Afs gm
	Table S1e. Fedspar: complete dataset for the EMPA, chemical formulae and thermobarometry results of alkali-feldpsars in groundmass from LHPCS lavas
	Rock Type	Sample	Spot																							KD pl-liq(An-Ab)	T (°C)	P (kbar)
		(thin section)		SiO2	TiO2	Al2O3	FeOtot	MnO	MgO	CaO	Na2O	K2O	Total		Si	Al	Fe3+	Ca	Na	K		XAn	XAb	XOr			[eq. 24a]	[eq. 25a]
				(wt%)											(apfu)
	TA	LH4	#170	64.9168	0.842134	19.0265	2.4445	0.0645886	0.235635	3.91538	6.09316	2.19831	99.737		2.88936	0.998062	0.0909892	0.18672	0.525815	0.124822		0.222987	0.627946	0.149066		0.832198
	TR	LH5-1	#72	64.3998	0.0536177	20.1972	0.37203	bdl	bdl	2.50046	7.36219	4.10079	98.99		2.90268	1.07291	0.0140232	0.120756	0.643381	0.235798		0.120764	0.643423	0.235814		0.485344	493.031
	TR	LH5-1	#74	64.5485	0.0765033	20.0017	0.491994	bdl	bdl	2.60751	7.43334	3.61764	98.783		2.90914	1.06243	0.0185436	0.125915	0.649544	0.207999		0.128033	0.660469	0.211498		0.469917	494.615
	AB	LH5-2	#4	66.9749	0.0654192	18.2408	0.588409	bdl	bdl	0.421442	8.43206	4.26792	99.014		3.00311	0.963959	0.0220645	0.0202474	0.73306	0.244137		0.0202993	0.734938	0.244763		26.8654
	AB	LH5-2	#12	64.9251	0.100003	20.063	0.657306	bdl	bdl	2.42749	8.72184	1.83241	98.742		2.9092	1.05953	0.0246311	0.116544	0.757732	0.104747		0.119041	0.773967	0.106992		4.82445
	AB	LH5-2	#15	64.6806	0.0956245	19.8542	0.5883	bdl	bdl	2.41673	8.52217	2.0523	98.237		2.91448	1.05438	0.0221687	0.116678	0.744533	0.117974		0.119158	0.76036	0.120482		4.735
	AB	LH5-2	#18	64.8472	0.111364	20.0383	0.459379	0.0443336	bdl	2.27803	8.2818	2.70347	98.777		2.91235	1.06064	0.0172535	0.109618	0.721146	0.154893		0.111213	0.73164	0.157147		4.88161
	AB	LH5-2	#32	65.6317	0.12265	19.4227	0.623977	bdl	0.0734887	1.84585	8.30615	2.35028	98.387		2.94612	1.02755	0.023424	0.0887782	0.722908	0.134591		0.0938184	0.76395	0.142232		6.04227
	AB	LH5-2	#36	64.5021	0.330584	20.1861	1.01304	bdl	bdl	2.57987	8.33341	2.04211	99.005		2.8888	1.06549	0.0379423	0.123798	0.723623	0.116676		0.128408	0.750571	0.121021		4.33732
	AB	LH5-2	#41	65.465	0.152114	18.9919	0.779862	bdl	0.109372	0.921054	7.9152	3.48443	97.85		2.96228	1.01284	0.0295115	0.0446555	0.694425	0.201144		0.0474945	0.738574	0.213932		11.5392
	AB	LH5-2	#42	65.4988	0.103709	19.1925	0.511314	bdl	bdl	1.75546	8.81732	2.81284	98.692		2.94463	1.01692	0.0192239	0.0845592	0.768566	0.161325		0.0833547	0.757618	0.159027		6.74441
	AB	LH5-2	#43	66.0194	0.103773	19.0058	0.497804	bdl	bdl	1.27896	8.53055	3.30635	98.781		2.96345	1.00547	0.018687	0.0615115	0.742421	0.189336		0.0619284	0.747452	0.190619		8.95606
	AB	LH5-2	#41	65.2121	0.142795	20.1311	0.607468	bdl	bdl	2.35715	8.34417	2.43709	99.249		2.91157	1.0593	0.0226818	0.112761	0.722318	0.138813		0.115784	0.741682	0.142534		4.75328
	AB	LH5-2	#79	64.9346	0.127708	20.6953	0.633506	bdl	bdl	2.72226	8.44522	1.81859	99.409		2.89	1.08555	0.0235791	0.129815	0.728751	0.103256		0.134968	0.757678	0.107355		4.16561
	AB	LH5-2	#91	67.5303	0.0695294	17.9819	0.986706	bdl	bdl	0.187112	7.9994	4.93772	99.727		3.01238	0.94537	0.036809	0.00894304	0.691854	0.280993		0.00910891	0.704686	0.286205		57.4054
	AB	LH5-2	#93	66.2426	0.112557	19.9012	0.439863	bdl	bdl	1.93459	8.5467	2.36398	99.563		2.93943	1.04078	0.016323	0.0919786	0.735311	0.133822		0.0957002	0.765063	0.139237		5.93209
	AB	LH5-2	#114	67.3977	0.068748	16.8511	1.95123	bdl	bdl	0.0670322	7.77465	4.78314	98.935		3.03155	0.893311	0.0733981	0.00323055	0.678027	0.274467		0.00338021	0.709438	0.287182		155.738
	AB	LH5-2	#155	67.6108	0.18885	17.7202	1.43514	bdl	bdl	0.327388	8.47188	3.45183	99.247		3.01408	0.931028	0.0535044	0.0156377	0.73226	0.196312		0.0165617	0.775527	0.207911		34.7468
	TA	LH13	#190	65.6059	0.0524245	17.5921	0.158299	bdl	0.0812448	0.27077	4.60665	9.61757	97.992		3.02314	0.955408	0.00610028	0.0133687	0.411574	0.565379		0.0134993	0.415596	0.570904		5.89417
	TA	LH13	#191	65.1904	bdl	17.2629	0.595335	bdl	0.183872	0.642183	4.08837	9.58559	97.6		3.0188	0.942152	0.0230551	0.0318627	0.367069	0.566275		0.0330113	0.380301	0.586688		2.20561
	TA	LH13	#201	59.5341	0.132221	23.4136	0.699958	bdl	bdl	6.31727	5.98695	2.1205	98.237		2.71364	1.2578	0.0266818	0.308524	0.529102	0.123306		0.321068	0.550613	0.128319		0.328332
	TA	LH13	#204	66.6807	0.0683605	17.6675	0.385998	bdl	bdl	0.541234	5.36606	8.35466	99.078		3.02561	0.944806	0.0146471	0.026313	0.472079	0.483615		0.0267951	0.480729	0.492476		3.43485
	TA	LH13	#222	65.8278	0.0987619	18.3666	0.888307	bdl	0.0804982	2.00268	5.54835	6.13898	98.952		2.97613	0.978653	0.0335863	0.0970128	0.486356	0.354077		0.103486	0.518809	0.377704		0.959817
	TA	LH13	#238	65.6328	0.0597101	17.3251	0.409507	bdl	bdl	0.453242	5.215	8.25145	97.36		3.02946	0.942487	0.0158075	0.0224155	0.466709	0.485885		0.02299	0.478671	0.498339		3.98622
	TA	LH15	#33	62.3304	0.633914	17.6004	2.07062	bdl	0.331077	1.96489	6.50351	5.74422	97.179		2.90087	0.965399	0.0805905	0.0979804	0.586844	0.34105		0.0955092	0.572043	0.332448		2.0114
	TA	LH15	#35	62.5878	0.667377	17.4516	2.57448	bdl	0.443372	2.5274	6.46132	4.35471	97.088		2.89932	0.952789	0.099736	0.125445	0.580329	0.25735		0.130248	0.602549	0.267203		1.55358
	AB	LH27-1	#103	65.3744	0.155301	16.5284	2.26221	bdl	0.200678	1.42266	7.96181	4.77272	98.695		2.97753	0.887224	0.0861659	0.0694259	0.703083	0.277314		0.066131	0.669716	0.264153		7.60088
	AB	LH27-1	#109	65.99	0.276202	16.3819	2.12695	bdl	0.148909	0.552489	7.1309	6.12821	98.784		3.00432	0.878998	0.0809808	0.0269504	0.629448	0.355927		0.0266223	0.621784	0.351593		17.5296
	AB	LH27-1	#128	66.9493	0.110836	17.8041	1.22723	bdl	bdl	0.389053	8.465	3.29685	98.291		3.01114	0.943762	0.0461602	0.0187485	0.738175	0.189166		0.0198169	0.780238	0.199945		29.5509
	AB	LH27-1	#25	67.0508	0.107066	17.2612	1.30005	bdl	bdl	0.332869	8.87706	3.41118	98.401		3.01981	0.916229	0.0489657	0.0160628	0.775161	0.195992		0.0162708	0.785199	0.19853		36.22
	AB	LH27-1	#29	64.7579	0.111878	20.1875	0.97158	bdl	bdl	2.58376	8.56103	2.12682	99.321		2.89353	1.0631	0.0363053	0.123697	0.741665	0.121234		0.125378	0.751741	0.122881		4.50014
	AB	LH27-1	#31	64.6672	0.12748	20.2046	0.608049	0.0583203	bdl	2.76349	9.08651	1.6855	99.231		2.89073	1.06446	0.022731	0.132359	0.78753	0.0961195		0.130274	0.775121	0.094605		4.46573
	AB	LH27-1	#72	66.0726	0.101328	19.7045	1.19182	bdl	bdl	2.16143	9.11408	1.78086	100.16		2.92091	1.02664	0.0440618	0.102379	0.78119	0.100435		0.104043	0.793889	0.102068		5.72697
