# Supplementary material for: Anatomy of the magmatic plumbing system of Los Humeros Caldera (Mexico): implications for geothermal systems
Source: Copernicus journal article supplement (doi:10.5194/se-2019-86), 2019-05-22
Supplement: Supplementary file 4 [file S-Table3 - Ol.xlsx]

## Sheet: S3a - Ol pheno
	Table S3a. Olivine: complete dataset for the EMPA, chemical formulae and thermobarometry results of Olivine phenocrysts from LHPCS lavas
	Rock Type	Sample	Spot																						KD opx-liq(Mg-Fe)		T (°C)	T (°C)
		(thin section)		SiO2	TiO2	Al2O3	FeOtot	MnO	MgO	CaO	Cr2O3	Total		Si	Ti	Al	Cr	Fe2+	Mn	Mg	Ca		XFo				[eq. 2]	[eq. 2]
				(wt%)										(apfu)									(Mg#)				(P= 1kbar)	(P= 15kbar)
	TR	LH5-1	#1	37.6847	0.0576287	0.170919	32.2314	0.641229	28.6107	0.42361	bdl	99.866		1.04146	0.00119797	0.00556704	-	0.744926	0.0150099	1.17873	0.0125435		61.2793		0.322157		905.155	920.894
	TR	LH5-1	#2	34.6652	0.0695205	bdl	32.6048	0.499788	29.7761	0.327694	bdl	97.945		0.970578	0.00146413	-	-	0.763439	0.0118525	1.24284	0.00983058		61.9512		0.313133		895.474	911.044
	TR	LH5-1	#8	35.4282	bdl	bdl	32.6352	0.665119	30.5707	0.16579	bdl	99.57		0.974431	-	-	-	0.750663	0.0154949	1.25348	0.00488577		62.5481		0.305279		894.09	909.637
	TR	LH5-1	#9	35.0319	bdl	bdl	32.9233	0.685357	30.3731	0.193159	bdl	99.247		0.967202	-	-	-	0.760174	0.0160271	1.25012	0.00571402		62.1896		0.309978		894.411	909.963
	TR	LH5-1	#10	34.7406	0.0565025	0.0509101	32.5881	0.610988	30.0389	0.170333	bdl	98.278		0.9687	0.00118508	0.00167306	-	0.759916	0.0144301	1.24866	0.00508888		62.1701		0.310235		894.617	910.173
	TR	LH5-1	#11	35.6008	bdl	bdl	32.9828	0.644921	30.7488	0.183441	bdl	100.224		0.972798	-	-	-	0.753714	0.0149264	1.25256	0.00537072		62.4359		0.306744		894.113	909.66
	TA	LH4	#25	36.2155	bdl	bdl	25.9122	0.343456	37.3517	0.202397	bdl	100.07		0.952184	-	-	-	0.569753	0.00764863	1.46402	0.0057017		71.9886		0.296529		1034.17	1052.15
	TA	LH4	#26	36.1692	bdl	bdl	25.4417	0.405059	37.4245	0.224145	bdl	99.711		0.953082	-	-	-	0.560653	0.00904054	1.47013	0.00632838		72.3955		0.290579		1033.15	1051.12
	TA	LH4	#27	36.4899	bdl	bdl	25.4118	0.368241	37.3232	0.167754	bdl	99.8		0.961128	-	-	-	0.559759	0.00821536	1.46554	0.00473428		72.3648		0.291025		1033.91	1051.88
	TA	LH4	#28	36.139	bdl	bdl	25.5483	0.339491	37.4786	0.147729	bdl	99.67		0.9524	-	-	-	0.563069	0.00757804	1.47243	0.0041714		72.3408		0.291375		1032.76	1050.72
	TA	LH4	#29	35.8724	bdl	bdl	27.568	0.38889	35.7509	0.173232	bdl	99.788		0.954419	-	-	-	0.613396	0.00876379	1.418	0.00493833		69.8075		0.329604		1041.95	1060.07
	TA	LH4	#30	36.3111	bdl	bdl	27.418	0.456725	35.9447	0.157192	bdl	100.335		0.960641	-	-	-	0.606614	0.0102344	1.41764	0.00445579		70.036		0.326042		1042.04	1060.16
	TA	LH4	#31	36.4274	bdl	bdl	24.5197	0.357219	38.2367	0.185782	bdl	99.772		0.954783	-	-	-	0.537461	0.00793043	1.49405	0.00521739		73.5469		0.274099		1029.34	1047.24
	TA	LH4	#32	36.5246	bdl	bdl	24.7653	0.402863	38.3917	0.19158	bdl	100.29		0.952605	-	-	-	0.540164	0.0088996	1.4927	0.00535367		73.4315		0.275727		1029.5	1047.4
	TA	LH4	#33	36.6225	bdl	bdl	24.0305	0.328839	38.2569	0.193108	bdl	99.497		0.961577	-	-	-	0.527662	0.00731317	1.49746	0.00543264		73.9472		0.26849		1028.89	1046.79
	TA	LH4	#34	36.7608	bdl	bdl	24.612	0.314408	38.189	0.183924	bdl	100.095		0.961081	-	-	-	0.538119	0.00696233	1.48841	0.00515213		73.4494		0.275475		1030.24	1048.16
	TA	LH4	#35	36.9724	bdl	bdl	24.439	0.397484	38.3513	0.162097	bdl	100.34		0.963602	-	-	-	0.532673	0.00877458	1.49008	0.00452657		73.669		0.272382		1029.93	1047.83
	TA	LH4	#36	36.9124	bdl	bdl	25.1425	0.331203	38.0605	0.127171	bdl	100.605		0.961983	-	-	-	0.547974	0.00731096	1.47869	0.00355104		72.965		0.282363		1031.78	1049.72
	TA	LH4	#37	36.7034	bdl	bdl	27.7635	0.469729	35.4639	0.184435	bdl	100.592		0.97107	-	-	-	0.614291	0.0105263	1.39875	0.0052283		69.4877		0.334627		1045.28	1063.45
	TA	LH4	#38	36.7924	bdl	bdl	28.2101	0.387841	34.9296	0.176599	bdl	100.525		0.976858	-	-	-	0.626375	0.00872194	1.38253	0.00502384		68.8235		0.345211		1048.17	1066.4
	TA	LH4	#39	36.648	bdl	bdl	27.8946	0.368751	35.1523	0.181272	bdl	100.265		0.9738	-	-	-	0.619862	0.00829924	1.39246	0.00516087		69.2		0.339187		1046.36	1064.55
	TA	LH4	#40	37.1981	bdl	bdl	24.7575	0.402387	38.2918	0.182842	bdl	100.885		0.965834	-	-	-	0.537581	0.00884935	1.48216	0.00508664		73.3868		0.276359		1031.27	1049.2
	TA	LH4	#41	36.838	bdl	bdl	25.8335	0.411951	36.7151	0.204768	bdl	100.013		0.971579	-	-	-	0.569799	0.00920267	1.44356	0.00578653		71.7024		0.300754		1037.58	1055.62
	TA	LH4	#42	36.523	bdl	bdl	26.6147	0.469753	36.8498	0.20548	bdl	100.694		0.958132	-	-	-	0.583898	0.0104379	1.44113	0.00577565		71.1692		0.308716		1037.96	1056.01
	TA	LH4	#43	36.4097	bdl	bdl	27.3427	0.40433	35.9824	0.208989	bdl	100.376		0.962398	-	-	-	0.604415	0.00905229	1.41787	0.00591881		70.1156		0.324807		1041.97	1060.09
	TA	LH4	#44	36.0839	bdl	bdl	29.2487	0.502025	33.7603	0.241988	bdl	99.87		0.970164	-	-	-	0.657651	0.0114326	1.35315	0.00697107		67.2977		0.370317		1053.51	1071.83
	TA	LH15	#6	38.5964	bdl	bdl	21.1884	0.318681	40.3829	0.173038	bdl	100.712		0.989538	-	-	-	0.454296	0.00692033	1.54344	0.00475336		77.2623		0.295104		1027.25	1045.11
	TA	LH15	#7	38.8862	bdl	bdl	20.5131	0.330867	40.3153	0.162521	bdl	100.208		1.00054	-	-	-	0.441393	0.0072107	1.54638	0.00448043		77.7974		0.286179		1026.85	1044.71
	TA	LH15	#8	37.6581	bdl	bdl	25.5745	0.351143	36.4726	0.183405	bdl	100.273		0.991586	-	-	-	0.563164	0.00783144	1.43168	0.00517434		71.7723		0.394381		1045.5	1063.68
	TA	LH15	#11	38.1427	bdl	bdl	24.6429	0.410678	37.1971	0.132357	bdl	100.547		0.997551	-	-	-	0.538978	0.00909727	1.45024	0.00370889		72.9082		0.372613		1042.34	1060.46
	TA	LH15	#15	36.6894	0.0412632	bdl	30.8757	0.491645	31.9364	0.265541	bdl	100.389		0.992606	0.000839709	-	-	0.698568	0.0112661	1.28804	0.00769733		64.8398		0.543759
	TA	LH15	#16	37.6709	0.0827792	bdl	29.9899	0.588105	31.5452	0.428588	bdl	100.347		1.02	0.00168595	-	-	0.679085	0.0134876	1.27331	0.0124339		65.2215		0.534709
	TA	LH15	#19	37.4848	0.0524642	bdl	27.0894	0.419324	34.8793	0.220989	bdl	100.163		0.997154	0.00104978	-	-	0.602645	0.00944805	1.38319	0.0062987		69.6562		0.436824
	TA	LH15	#20	37.3444	0.0521616	bdl	28.2436	0.44161	33.8815	0.187978	bdl	100.154		0.99951	0.00105013	-	-	0.632176	0.0100112	1.35186	0.00539065		68.1404		0.46885
	TA	LH15	#21	36.9763	0.0487298	bdl	29.2219	0.497664	33.6674	0.256574	bdl	100.72		0.987461	0.000978861	-	-	0.652621	0.0112569	1.34034	0.00734146		67.2572		0.488173
	TA	LH15	#53	38.8004	bdl	bdl	21.5431	0.266967	39.971	0.150018	bdl	100.756		0.996502	-	-	-	0.462706	0.00580744	1.53037	0.00412818		76.7871		0.303136		1029.31	1047.21
	TA	LH15	#54	38.4099	bdl	bdl	22.8914	0.289025	39.3459	0.241173	bdl	101.255		0.986999	-	-	-	0.491927	0.00629063	1.50723	0.00664011		75.3963		0.327226		1033.07	1051.03
	TA	LH15	#55	37.3331	0.0456406	bdl	27.4095	0.48638	35.0942	0.28837	bdl	100.681		0.988256	0.000908773	-	-	0.606781	0.0109053	1.3849	0.00817896		69.5376		0.43928
	TA	LH15	#56	37.5467	bdl	bdl	29.1118	0.368426	33.445	0.195797	bdl	100.737		1.00297	-	-	-	0.650337	0.00833586	1.33185	0.00560394		67.1944		0.489567
	TA	LH15	#68	39.1338	bdl	bdl	21.5084	0.311107	40.2923	0.197261	bdl	101.461		0.997691	-	-	-	0.458572	0.00671798	1.53135	0.00538838		76.9581		0.300235		1029.17	1047.07
	TA	LH15	#69	39.1498	bdl	bdl	20.9144	0.306808	40.3209	0.140417	bdl	100.866		1.00236	-	-	-	0.447811	0.00665344	1.53898	0.00385199		77.4633		0.291737		1028.02	1045.89
	TA	LH15	#70	38.9549	bdl	bdl	21.537	0.212968	40.0736	0.196415	bdl	101.04		0.997783	-	-	-	0.461334	0.00462034	1.53017	0.0053904		76.8378		0.302276		1029.45	1047.35
	TA	LH15	#71	38.836	bdl	bdl	21.6567	0.304356	40.4591	0.153574	bdl	101.431		0.989864	-	-	-	0.461624	0.00657067	1.53733	0.00419404		76.9095		0.301058		1028.23	1046.11
	TA	LH15	#72	38.3626	bdl	bdl	24.4997	0.378761	37.6907	0.228966	bdl	101.168		0.995476	-	-	-	0.531667	0.00832478	1.45803	0.00636601		73.2821		0.365597		1041.03	1059.13
	TA	LH15	#87	38.6701	bdl	bdl	21.1594	0.286673	40.4067	0.190972	bdl	100.738		0.990958	-	-	-	0.453461	0.00622233	1.54363	0.00524353		77.2967		0.294527		1027.24	1045.1
	TA	LH15	#88	38.7119	bdl	bdl	20.7306	0.30646	40.7389	0.170859	bdl	100.694		0.990492	-	-	-	0.443582	0.0066415	1.5539	0.004684		77.7957		0.286206		1025.67	1043.5
	TA	LH15	#89	38.4518	bdl	bdl	20.5967	0.309638	41.0165	0.188681	bdl	100.638		0.983349	-	-	-	0.440498	0.00670703	1.56372	0.00517		78.0241		0.282432		1024.34	1042.15
	TA	LH15	#90	38.4327	bdl	bdl	20.554	0.251099	40.905	0.201043	bdl	100.421		0.98493	-	-	-	0.440511	0.00545048	1.56275	0.00552036		78.0131		0.282615		1024.44	1042.26
	TA	LH15	#93	38.7121	bdl	bdl	20.0404	0.248465	41.1832	0.145399	bdl	100.401		0.990466	-	-	-	0.428801	0.00538449	1.5708	0.00398592		78.5584		0.273692		1023.23	1041.03
	TA	LH15	#94	39.2705	bdl	bdl	19.1269	0.271325	42.3212	0.204151	bdl	101.194		0.991633	-	-	-	0.403911	0.00580311	1.59313	0.00552345		79.7771		0.254192		1019.82	1037.55
	TA	LH15	#95	39.2909	bdl	bdl	19.1432	0.307227	42.2892	0.155023	bdl	101.187		0.992448	-	-	-	0.404377	0.00657297	1.59241	0.00419551		79.7511		0.254602		1019.93	1037.67
	TA	LH15	#96	39.3198	bdl	bdl	19.3442	0.278036	42.2248	0.160319	bdl	101.338		0.992424	-	-	-	0.408312	0.00594392	1.58877	0.00433556		79.5572		0.257667		1020.46	1038.2
	TA	LH15	#97	39.1522	bdl	bdl	19.1634	0.26829	42.5123	0.18881	bdl	101.285		0.987167	-	-	-	0.404076	0.00572959	1.59793	0.00510073		79.819		0.253533		1019.12	1036.84
	TA	LH15	#98	39.2182	bdl	0.0446848	18.9219	0.258525	42.5337	0.214717	bdl	101.207		0.989095	-	0.00132821	-	0.399091	0.00552254	1.59916	0.00580217		80.0305		0.250212		1018.97	1036.69
	TA	LH15	#113	38.4123	bdl	bdl	22.9449	0.342862	39.141	0.187448	bdl	101.074		0.989467	-	-	-	0.494279	0.0074806	1.50304	0.0051735		75.2559		0.329708		1033.71	1051.68
	TA	LH15	#114	38.8893	bdl	bdl	20.97	0.250966	40.2271	0.162785	bdl	100.536		0.99895	-	-	-	0.450473	0.00546027	1.54043	0.00448022		77.3762		0.293194		1027.84	1045.71
	TA	LH15	#115	38.5911	bdl	bdl	21.3625	0.283333	40.3477	0.173076	bdl	100.784		0.989142	-	-	-	0.457909	0.00615112	1.54169	0.00475314		77.1028		0.297789		1027.59	1045.45
	TA	LH15	#118	38.5071	bdl	bdl	21.018	0.341413	40.6151	0.165501	bdl	100.693		0.986419	-	-	-	0.450266	0.00740775	1.55102	0.00454249		77.5039		0.291059		1026.22	1044.07
	TA	LH15	#119	38.56	bdl	0.041514	20.7531	0.292034	40.3433	0.157288	bdl	100.223		0.992537	-	0.00125939	-	0.446733	0.0063669	1.54807	0.00433789		77.6079		0.289325		1026.72	1044.57
	TA	LH17	#191	38.5335	bdl	bdl	21.9253	0.278358	39.5167	0.197284	bdl	100.458		0.994567	-	-	-	0.473257	0.00608533	1.52049	0.00545582		76.2659		0.272414		1068.55	1087.13
	TA	LH17	#192	38.2143	bdl	bdl	21.9391	0.331391	39.4205	0.198997	bdl	100.121		0.989748	-	-	-	0.475196	0.00726985	1.52205	0.00552229		76.2104		0.27325		1068.3	1086.88
	TA	LH17	#193	38.2712	bdl	bdl	22.2272	0.381531	39.7279	0.187554	bdl	100.827		0.9844	-	-	-	0.478125	0.00831218	1.52336	0.00516892		76.1144		0.274697		1068.05	1086.62
	TA	LH17	#194	37.6327	bdl	bdl	23.9571	0.294094	38.1803	0.212488	bdl	100.315		0.980985	-	-	-	0.522261	0.00649336	1.4837	0.00593479		73.9676		0.308077		1074.91	1093.6
	TA	LH17	#195	37.9359	bdl	bdl	21.272	0.216985	40.2922	0.141261	bdl	99.902		0.979939	-	-	-	0.45953	0.0047475	1.55159	0.0039097		77.1534		0.25921		1063.45	1081.94
	TA	LH17	#196	38.2656	bdl	bdl	22.3311	0.297826	38.6369	0.205381	bdl	99.759		0.998133	-	-	-	0.487132	0.00658002	1.50242	0.00574002		75.5184		0.283774		1071.75	1090.38
	TA	LH17	#227	38.4013	bdl	bdl	22.5536	0.275629	39.4405	0.172285	bdl	100.891		0.988908	-	-	-	0.485716	0.00601202	1.51412	0.00475369		75.7152		0.280762		1069.7	1088.3
	TA	LH17	#228	38.4748	bdl	bdl	22.3238	0.325876	39.167	0.207099	bdl	100.532		0.994637	-	-	-	0.482628	0.00713553	1.50944	0.00573641		75.7755		0.279841		1070.45	1089.07
	TA	LH17	#229	38.6335	bdl	bdl	22.2237	0.388392	39.4529	0.220758	bdl	100.945		0.993938	-	-	-	0.478153	0.00846351	1.51315	0.00608533		75.9908		0.276568		1069.85	1088.45
	TA	LH17	#230	37.7586	bdl	bdl	26.189	0.461519	36.0313	0.198552	bdl	100.72		0.993609	-	-	-	0.576334	0.0102867	1.41347	0.00559819		71.039		0.356864		1087.87	1106.79
	TA	LH17	#231	38.3041	bdl	bdl	22.2652	0.384495	39.5973	0.220364	bdl	100.793		0.986165	-	-	-	0.479388	0.00838457	1.51977	0.00607881		76.0235		0.276074		1068.71	1087.3
	TA	LH17	#232	38.1811	bdl	bdl	24.3118	0.419565	37.8849	0.155786	bdl	100.96		0.991563	-	-	-	0.528013	0.00922905	1.46672	0.00433486		73.5327		0.315076		1077.9	1096.64
	TA	LH17	#233	38.1967	bdl	bdl	25.2324	0.474932	37.4898	0.224258	bdl	101.672		0.989117	-	-	-	0.546433	0.0104169	1.44725	0.00622218		72.595		0.330453		1081.48	1100.28
	TA	LH17	#234	38.3222	bdl	bdl	24.9573	0.415931	37.2338	0.170676	bdl	101.157		0.997387	-	-	-	0.543208	0.00916896	1.44464	0.00475946		72.6767		0.329098		1081.92	1100.74
	TA	LH17	#261	36.1949	0.0543796	bdl	31.8168	0.576491	30.8063	0.303023	bdl	99.86		0.990693	0.00111959	-	-	0.728291	0.0133651	1.25701	0.00888671		63.3196		0.507085
	TA	LH17	#262	36.2412	0.0543072	bdl	32.1805	0.548596	30.4845	0.309769	bdl	99.878		0.993375	0.00111969	-	-	0.737666	0.0127365	1.24566	0.00909748		62.8103		0.518297
	TA	LH21-2	#4	35.4757	bdl	bdl	30.3799	0.522825	33.0247	0.300366	bdl	99.795		0.959563	-	-	-	0.687203	0.011978	1.33165	0.00870494		79.5738		0.397088		1095.88	1114.94
	TA	LH21-2	#5	35.2898	0.0473317	bdl	30.9043	0.492393	31.8656	0.318042	bdl	98.962		0.967398	0.000975972	-	-	0.708486	0.0114328	1.30223	0.00934145		65.9643		0.409149
	TA	LH21-2	#6	35.5556	bdl	bdl	29.7633	0.593244	32.8877	0.346943	bdl	99.198		0.966324	-	-	-	0.676475	0.0136563	1.33247	0.0101029		64.768		0.431351
	TA	LH21-2	#7	35.3441	0.0409126	bdl	30.3465	0.445079	32.9432	0.265678	bdl	99.398		0.959326	0.000835286	-	-	0.688833	0.0102323	1.33298	0.0077264		66.3303		0.402515
	TA	LH21-2	#8	35.3912	bdl	bdl	29.9342	0.534299	32.8166	0.298286	bdl	98.997		0.964039	-	-	-	0.681904	0.0123273	1.33261	0.00870575		65.9335		0.40971
	TA	LH21-2	#10	35.4033	bdl	bdl	30.7696	0.482658	32.1947	0.374397	bdl	99.319		0.965867	-	-	-	0.702024	0.0111532	1.30938	0.0109441		66.154		0.405702
	TA	LH21-2	#11	35.5278	bdl	bdl	30.0918	0.535226	33.2055	0.34137	bdl	99.712		0.960025	-	-	-	0.680015	0.01225	1.33762	0.00988353		65.1015		0.42508
	TA	LH21-2	#14	35.3868	bdl	bdl	30.3193	0.49913	32.7486	0.330006	bdl	99.361		0.961813	-	-	-	0.689168	0.0114908	1.32694	0.00961047		66.3		0.403063
	TA	LH21-2	#21	35.8885	bdl	bdl	29.621	0.48779	32.7843	0.330521	bdl	99.171		0.975811	-	-	-	0.673543	0.0112339	1.32888	0.00962903		65.8205		0.411775
	TA	LH26-1	#147	42.7617	bdl	bdl	0.772332	0.210239	57.6118	bdl	bdl	101.399		0.990839	-	-	-	0.0149661	0.00412616	1.99007	-		72.1632		0.358661		932.577	948.793
	TA	LH26-1	#148	42.488	bdl	bdl	0.92511	0.245233	57.4944	0.0449534	bdl	101.244		0.986349	-	-	-	0.0179603	0.00482203	1.98975	0.00111815		99.2537		0.0069912
	TA	LH26-1	#150	42.8077	bdl	bdl	1.00276	0.24305	57.6844	bdl	bdl	101.841		0.98865	-	-	-	0.0193675	0.00475447	1.98604	-		99.1056		0.00839126
	TA	LH26-1	#152	42.8554	bdl	bdl	1.01962	0.299873	57.4702	bdl	bdl	101.745		0.991466	-	-	-	0.0197272	0.00587618	1.98209	-		99.0344		0.00906561
	TA	LH26-2	#220	37.1539	0.0566934	bdl	27.8419	0.380752	35.9753	0.216415	bdl	101.625		0.972061	0.00111571	-	-	0.609177	0.00843754	1.40314	0.00606666		99.0147		0.00925237
	AB	LH5-2	#4	38.5756	0.0427398	bdl	22.0849	0.294156	38.1255	0.405063	bdl	99.579		1.00958	0.000841377	-	-	0.483371	0.00652067	1.48748	0.0113586		75.477		0.504297
	AB	LH5-2	#10	39.785	bdl	0.0702587	14.5948	0.2053	43.9437	0.257609	0.0523662	98.92		1.01078	-	0.00210374	0.00105187	0.310091	0.00441785	1.66434	0.00701246		84.2968		0.289138		1262.41	1284.36
	AB	LH5-2	#44	38.8924	bdl	bdl	13.7343	0.233518	46.2484	0.260001	0.0422819	99.413		0.973661	-	-	0.000836898	0.287544	0.00495165	1.72603	0.00697415		85.7217		0.258532		1249.5	1271.22
	AB	LH5-2	#45	37.3354	bdl	bdl	22.7194	0.360946	38.2943	0.416837	bdl	99.201		0.980566	-	-	-	0.499011	0.00802942	1.49934	0.0117299		75.0318		0.516498
	AB	LH5-2	#48	39.7299	bdl	bdl	14.2539	0.13596	45.9007	0.304088	0.0497357	100.381		0.988631	-	-	0.000978496	0.296624	0.0028656	1.70272	0.00810754		85.166		0.270346		1254.3	1276.11
	AB	LH5-2	#49	38.3536	bdl	0.0559228	18.7702	0.320984	42.4505	0.343451	bdl	100.369		0.974417	-	0.0016745	-	0.398809	0.0069073	1.6078	0.00934927		80.1277		0.384939		1275.07	1297.24
	AB	LH5-2	#53	38.4368	bdl	bdl	19.788	0.241245	41.2245	0.27462	bdl	100.018		0.985884	-	-	-	0.424458	0.00524109	1.57631	0.00754717		78.7879		0.41788
	AB	LH5-2	#67	37.948	bdl	bdl	20.147	0.302505	40.4591	0.412824	bdl	99.332		0.982611	-	-	-	0.436273	0.00663454	1.56177	0.0114533		78.1677		0.43351
	AB	LH5-2	#75	37.6966	bdl	bdl	22.2817	0.33218	38.899	0.437657	bdl	99.703		0.982425	-	-	-	0.485626	0.00733257	1.51128	0.012221		75.684		0.498673
	AB	LH5-2	#76	35.9099	0.0404292	0.0408547	30.285	0.511628	31.0291	0.529808	0.0416689	98.481		0.991926	0.000840022	0.00133004	0.000910024	0.699599	0.0119703	1.27774	0.0156804		64.6229		0.849695
	AB	LH5-2	#80	38.0989	bdl	bdl	19.7453	0.280024	41.5289	0.379118	0.0413778	100.123		0.975068	-	-	0.000837268	0.422611	0.00607019	1.58446	0.0103961		78.9465		0.413921
	AB	LH5-2	#82	37.9635	bdl	bdl	19.3815	0.243122	41.364	0.346453	bdl	99.377		0.977944	-	-	-	0.417533	0.00530467	1.58847	0.00956236		79.1884		0.407916
	AB	LH5-2	#87	36.715	0.0858796	bdl	28.4597	0.420991	33.0781	0.448559	bdl	99.286		0.994471	0.00174972	-	-	0.644667	0.00965845	1.33567	0.0130179		67.45		0.749024
	AB	LH5-2	#2	37.6882	bdl	bdl	18.9181	0.244727	41.2661	0.396974	0.0680977	98.61		0.976971	-	-	0.00139567	0.410119	0.00537334	1.5947	0.0110258		79.5459		0.399107		1277.93	1300.16
	AB	LH5-2	#3	37.7784	bdl	bdl	18.9053	0.373068	41.4492	0.330207	0.0409915	98.926		0.976089	-	-	0.000837365	0.408495	0.00816431	1.59651	0.00914124		79.6288		0.397076		1277.6	1299.82
	AB	LH5-2	#4	37.7007	bdl	bdl	18.6816	0.261003	41.5512	0.347235	0.0511486	98.624		0.975764	-	-	0.00104666	0.404359	0.00572173	1.6032	0.00962925		79.8608		0.391415		1276.08	1298.27
	AB	LH5-2	#5	35.2379	0.233584	bdl	32.6848	0.56008	29.5456	0.407615	0.0825415	98.758		0.980925	0.004891	-	0.00181666	0.7609	0.0132057	1.2261	0.0121576		61.7099		0.963071
	AB	LH5-2	#6	35.9955	0.0437484	0.655077	29.9114	0.43633	30.3145	0.725293	bdl	98.228		0.998385	0.000912729	0.021414	-	0.693815	0.0102506	1.25346	0.0215544		64.3736		0.858997
	AB	LH5-2	#7	36.1689	bdl	0.0413712	26.4639	0.448411	34.1517	0.376034	0.0519333	97.798		0.985411	-	0.00132842	0.00111867	0.602964	0.0103477	1.38708	0.010977		69.7044		0.674601
	AB	LH5-2	#8	37.4732	bdl	bdl	18.7195	0.269982	41.5177	0.406764	0.0544435	98.477		0.971316	-	-	0.00111573	0.405779	0.00592734	1.60429	0.0112968		79.8152		0.392523		1275.82	1298.01
	AB	LH5-2	#9	37.9382	bdl	bdl	18.8306	0.274733	41.5066	0.371229	bdl	99.034		0.979166	-	-	-	0.406444	0.00600587	1.597	0.0102658		79.7153		0.39496		1277.76	1299.98
	AB	LH5-2	#13	38.0294	bdl	bdl	20.5502	0.296603	40.329	0.352967	0.0512502	99.645		0.983375	-	-	0.00104778	0.444398	0.00649623	1.55462	0.00977927		77.772		0.443613
	AB	LH5-2	#14	36.4505	bdl	bdl	26.0936	0.393994	35.5492	0.399058	bdl	98.981		0.975645	-	-	-	0.584089	0.00893231	1.41849	0.0114445		70.8365		0.639014
	AB	LH5-2	#15	37.7017	bdl	bdl	18.9574	0.273527	41.2811	0.389714	bdl	98.697		0.976782	-	-	-	0.410744	0.00600237	1.5944	0.0108182		79.5181		0.39979		1278.21	1300.43
	AB	LH5-2	#16	37.4656	bdl	bdl	18.4762	0.268596	41.2149	0.344724	0.0643198	97.897		0.977082	-	-	0.00132623	0.402964	0.00593313	1.60236	0.00963261		79.9079		0.390268		1276.3	1298.49
	AB	LH5-2	#17	35.6974	bdl	0.219827	28.9693	0.443826	32.1855	0.462272	0.0481895	98.033		0.98179	-	0.00712556	0.00104788	0.66631	0.010339	1.31963	0.0136224		66.4521		0.78358
	AB	LH5-2	#19	35.6336	bdl	bdl	27.5621	0.417735	34.0675	0.42116	0.0454005	98.2		0.968952	-	-	0.000976063	0.626772	0.00962119	1.38099	0.0122705		68.786		0.704332
	AB	LH5-2	#20	35.9127	bdl	bdl	25.0855	0.404241	35.4842	0.475736	bdl	97.458		0.97312	-	-	-	0.568456	0.00927778	1.43338	0.013812		71.6065		0.61545
	AB	LH5-2	#21	36.5113	bdl	bdl	22.8736	0.353936	37.2709	0.445237	bdl	97.553		0.977731	-	-	-	0.512251	0.00802792	1.48789	0.0127749		74.3923		0.534282
	AB	LH5-2	#22	36.6031	0.045626	bdl	21.949	0.327267	38.8337	0.421329	bdl	98.236		0.966314	0.000906029	-	-	0.484586	0.00731792	1.52833	0.0119178		75.9291		0.492053
	AB	LH5-2	#24	35.343	bdl	bdl	28.6601	0.442336	33.1642	0.461476	bdl	98.186		0.966611	-	-	-	0.655514	0.0102468	1.35215	0.0135229		67.353		0.752339
	AB	LH5-2	#31	38.6659	bdl	bdl	14.4615	0.235901	45.6936	0.284907	bdl	99.374		0.971528	-	-	-	0.303877	0.00502045	1.71156	0.00767014		84.9245		0.275527		1252.62	1274.4
	AB	LH5-2	#32	39.1973	bdl	bdl	14.1222	0.207375	45.8017	0.262815	0.0599481	99.655		0.981614	-	-	0.00118696	0.295762	0.00439872	1.70992	0.00705192		85.2558		0.268426		1252.76	1274.54
	AB	LH5-2	#33	39.3227	bdl	bdl	13.1422	0.171604	46.4664	0.292184	0.0530307	99.454		0.982357	-	-	0.00104744	0.274568	0.00363112	1.73051	0.00782086		86.3082		0.246227		1248.56	1270.27
	AB	LH5-2	#34	39.1712	bdl	0.0545594	13.5761	0.13203	46.3444	0.284414	0.042433	99.642		0.978217	-	0.00160581	0.000837813	0.28353	0.00279271	1.72534	0.00761014		85.888		0.255025		1249.82	1271.55
	AB	LH5-2	#35	39.2148	bdl	bdl	13.9766	0.151754	46.08	0.286872	0.0706844	99.783		0.979617	-	-	0.00139606	0.291987	0.00321095	1.71604	0.00767835		85.461		0.264054		1251.47	1273.23
	AB	LH5-2	#36	39.117	bdl	bdl	13.4216	0.20352	45.9887	0.249115	0.0632994	99.085		0.982564	-	-	0.0012571	0.28194	0.00433001	1.72209	0.00670453		85.9333		0.254073		1250.24	1271.98
	AB	LH5-2	#37	36.1494	0.0481549	bdl	22.9	0.354335	37.0259	0.369454	0.0458137	96.893		0.974677	0.000976631	-	0.000976631	0.516359	0.00809208	1.48825	0.0106732		74.2444		0.538437
	AB	LH5-2	#38	37.1928	0.0535051	bdl	18.9611	0.31994	41.4314	0.290481	0.040723	98.334		0.966285	0.00104561	-	0.00083649	0.411971	0.00704045	1.60467	0.00808607		79.574		0.398419		1275.92	1298.1
	AB	LH5-2	#39	34.662	0.062414	0.0419307	30.4769	0.493013	30.2076	0.401267	bdl	96.382		0.979791	0.00132706	0.00139691	-	0.720455	0.0118039	1.27293	0.0121531		63.8614		0.878334
	AB	LH5-2	#40	39.0712	bdl	0.0452107	14.0039	0.231769	46.5145	0.232949	bdl	100.147		0.971458	-	0.00132484	-	0.291186	0.004881	1.72411	0.00620584		85.5531		0.262099		1249.93	1271.66
	AB	LH5-2	#41	39.36	bdl	bdl	13.3218	0.18456	46.2476	0.208426	0.0529605	99.395		0.985095	-	-	0.00104797	0.278831	0.00391244	1.72552	0.00558919		86.0907		0.250771		1249.64	1271.37
	AB	LH5-2	#42	36.6551	0.0417635	0.406481	18.2779	0.339979	39.7271	0.317625	0.0496662	95.871		0.978841	0.000838887	0.012793	0.00104861	0.408188	0.0076898	1.58151	0.00908794		79.4875		0.40054
	AB	LH5-2	#43	39.7058	bdl	bdl	13.3361	0.176008	46.6029	0.212645	0.0498076	100.108		0.986351	-	-	0.000978246	0.277053	0.00370336	1.72584	0.00565985		86.1692		0.249128		1249.52	1271.25
	AB	LH5-2	#44	39.6373	bdl	bdl	13.1517	0.203103	46.9798	0.257944	0.0463705	100.295		0.981357	-	-	0.000907694	0.272308	0.00425918	1.73398	0.00684262		86.4291		0.243712		1247.87	1269.56
	AB	LH5-2	#45	39.5214	bdl	bdl	12.9623	0.21507	46.6243	0.251102	0.0425362	99.619		0.985143	-	-	0.000838301	0.270212	0.0045408	1.73256	0.00670641		86.5099		0.242033		1248.17	1269.87
	AB	LH5-2	#46	39.6801	bdl	bdl	13.8114	0.179824	46.584	0.252719	0.0428101	100.592		0.982677	-	-	0.000838223	0.286044	0.003772	1.71982	0.00670578		85.7416		0.258111		1250.92	1272.67
	AB	LH5-2	#47	37.5343	bdl	bdl	19.8264	0.359916	41.0723	0.357539	0.0443585	99.24		0.969975	-	-	0.000906323	0.428482	0.00787804	1.5823	0.00989984		78.6935		0.420244
	AB	LH5-2	#48	38.6582	bdl	bdl	18.4505	0.261581	42.0032	0.375276	bdl	99.844		0.988091	-	-	-	0.394384	0.00566302	1.60047	0.0102773		80.2324		0.382411		1276.89	1299.09
	AB	LH5-2	#49	37.9818	bdl	bdl	18.6587	0.234173	42.0127	0.33727	0.0549851	99.305		0.975234	-	-	0.00111623	0.400656	0.00509279	1.60813	0.00927864		80.0574		0.38664		1274.86	1297.03
	AB	LH5-2	#50	37.9333	bdl	bdl	20.1643	0.350907	40.6687	0.345487	bdl	99.501		0.980012	-	-	-	0.435662	0.0076787	1.56632	0.00956348		78.2411		0.431646
	AB	LH18-1	#1	39.028	bdl	bdl	13.3574	0.213199	47.5012	0.284408	bdl	100.445		0.963209	-	-	-	0.27569	0.00445672	1.74766	0.00752072		69.731		0.403602
	AB	LH18-1	#2	38.8671	bdl	bdl	13.4316	0.173224	47.6601	0.260707	bdl	100.453		0.958772	-	-	-	0.277087	0.00361932	1.75266	0.00689063		86.3765		0.243985		1232.64	1254.07
	AB	LH18-1	#3	38.4796	bdl	bdl	13.6784	0.16172	47.0617	0.208723	bdl	99.666		0.95801	-	-	-	0.284793	0.00341028	1.74669	0.0055678		86.3506		0.244523		1233.81	1255.26
	AB	LH18-1	#4	38.009	bdl	bdl	17.3881	0.320325	43.5197	0.273685	bdl	99.542		0.966189	-	-	-	0.369644	0.00689687	1.64919	0.0074542		85.9829		0.252182		1253.75	1275.55
	AB	LH18-1	#8	39.4722	bdl	bdl	14.9123	0.228556	45.5821	0.277563	0.0425829	100.604		0.982953	-	-	0.000838399	0.310557	0.00482079	1.69217	0.00740585		81.6926		0.346668		1244.87	1266.51
	AB	LH18-1	#9	38.6898	bdl	bdl	18.0631	0.356888	43.5236	0.276951	bdl	100.949		0.97285	-	-	-	0.379838	0.00760094	1.63148	0.00746147		84.4954		0.283856		1257.57	1279.44
	AB	LH18-1	#10	38.4029	bdl	bdl	18.0453	0.261343	43.6384	0.302147	0.0454961	100.703		0.967043	-	-	0.000905797	0.380017	0.00557414	1.63817	0.00815217		81.1174		0.360094		1256.1	1277.94
	AB	LH18-1	#11	39.0226	bdl	bdl	16.7023	0.267262	44.7132	0.263442	0.0565565	101.038		0.973891	-	-	0.00111597	0.3486	0.00564959	1.66356	0.00704455		81.1728		0.358793		1250.65	1272.4
	AB	LH18-1	#12	38.3609	bdl	bdl	18.5735	0.318761	42.9157	0.295699	bdl	100.563		0.9709	-	-	-	0.393129	0.0068334	1.61924	0.00801878		82.6776		0.324108		1260.38	1282.29
	AB	LH18-1	#13	38.2168	bdl	bdl	19.352	0.3448	42.661	0.285428	bdl	100.904		0.966553	-	-	-	0.409309	0.00738624	1.60846	0.00773465		80.4668		0.375513		1262.8	1284.76
	AB	LH18-1	#16	38.7139	bdl	0.0491879	19.2478	0.309623	42.324	0.324633	bdl	101.044		0.979056	-	0.00146607	-	0.407079	0.00663223	1.59564	0.00879643		79.7173		0.393588		1265.58	1287.59
	AB	LH18-1	#17	39.0667	bdl	bdl	19.3355	0.337456	42.3709	0.375544	0.0596677	101.604		0.983558	-	-	0.0011877	0.407103	0.00719609	1.59027	0.0101304		79.6763		0.394587		1266.85	1288.88
	AB	LH18-1	#18	38.4473	bdl	bdl	19.17	0.353814	42.2763	0.341282	0.0486842	100.665		0.975628	-	-	0.000976744	0.406814	0.00760465	1.59928	0.00927907		79.6206		0.395945		1264.72	1286.72
	AB	LH18-1	#20	38.2877	bdl	bdl	19.2997	0.303597	41.8739	0.385531	bdl	100.251		0.976942	-	-	-	0.411829	0.00656134	1.5928	0.01054		79.7237		0.393434		1266.37	1288.39
	AB	LH18-1	#21	38.2613	bdl	bdl	19.1134	0.321177	42.4079	0.379563	bdl	100.582		0.971035	-	-	-	0.405667	0.00690409	1.60447	0.0103213		79.4587		0.399904		1263.68	1285.66
	AB	LH18-1	#23	38.3738	bdl	bdl	19.2884	0.286988	41.6895	0.354324	bdl	100.078		0.981031	-	-	-	0.412382	0.00621436	1.58885	0.00970557		79.8215		0.391056		1267.1	1289.13
	AB	LH18-1	#24	38.682	bdl	bdl	19.3603	0.305067	41.9347	0.37457	bdl	100.709		0.982727	-	-	-	0.411332	0.00656455	1.5882	0.010196		79.3962		0.401436		1267.26	1289.3
	AB	LH18-1	#27	38.3968	bdl	bdl	19.3444	0.258802	41.9405	0.368259	0.0485196	100.392		0.978061	-	-	0.000977153	0.412079	0.00558373	1.59262	0.0100507		79.4312		0.400577		1266.26	1288.27
	AB	LH18-1	#28	38.745	bdl	bdl	19.1631	0.286528	42.2253	0.36035	0.0662749	100.934		0.981395	-	-	0.00132725	0.405928	0.00614725	1.59444	0.00977972		79.4469		0.400192		1265.94	1287.96
	AB	LH18-1	#30	38.1733	bdl	bdl	19.3421	0.294503	42.1811	0.373519	bdl	100.443		0.970972	-	-	-	0.411439	0.00634485	1.59946	0.0101797		79.7099		0.393768		1264.72	1286.71
	AB	LH18-1	#33	38.0756	bdl	bdl	19.4868	0.281565	42.23	0.35562	bdl	100.498		0.967989	-	-	-	0.414305	0.006063	1.60049	0.00968686		79.5421		0.397862		1264.46	1286.45
	AB	LH18-1	#34	38.0887	bdl	bdl	19.0979	0.280571	42.1707	0.293179	bdl	99.976		0.972475	-	-	-	0.407779	0.00606751	1.6051	0.00802027		79.4395		0.400374		1263.55	1285.52
	AB	LH18-1	#35	37.8661	bdl	bdl	19.4467	0.286866	42.0638	0.364366	0.0448893	100.115		0.966618	-	-	0.000905986	0.415151	0.00620252	1.60074	0.00996585		79.7441		0.392936		1264.48	1286.47
	AB	LH18-1	#37	37.9969	bdl	bdl	19.2108	0.324702	41.8508	0.325302	0.0447732	99.781		0.973331	-	-	0.000906787	0.411542	0.00704504	1.59818	0.00892836		79.4087		0.40113		1265.07	1287.06
	AB	LH18-1	#40	37.6967	bdl	bdl	19.1779	0.196772	42.5681	0.323854	bdl	100.016		0.960437	-	-	-	0.408623	0.00424633	1.61681	0.00884073		79.525		0.39828		1260.81	1282.73
	AB	LH18-1	#41	37.7788	bdl	bdl	19.4827	0.225625	42.2158	0.33379	0.0552485	100.092		0.963761	-	-	0.00111434	0.415647	0.00487522	1.60548	0.00912362		79.828		0.390898		1263.28	1285.25
	AB	LH18-1	#42	37.9494	bdl	bdl	19.0372	0.290266	42.2947	0.339093	0.0621925	99.993		0.968219	-	-	0.00125453	0.406189	0.00627265	1.60866	0.00926958		79.4375		0.400424		1262.6	1284.56
	AB	LH18-1	#43	38.1464	bdl	bdl	19.46	0.307033	42.0599	0.309143	bdl	100.362		0.971938	-	-	-	0.414652	0.00662606	1.59758	0.00843951		79.8428		0.390539		1265.34	1287.34
	AB	LH18-1	#44	37.6457	bdl	bdl	18.8087	0.292427	42.3859	0.373427	bdl	99.558		0.963206	-	-	-	0.402456	0.00633734	1.61672	0.0102372		79.396		0.401441		1260.83	1282.75
	AB	LH18-1	#45	37.8078	bdl	bdl	19.2783	0.280391	42.2409	0.349043	bdl	100.027		0.964753	-	-	-	0.411396	0.00606018	1.60685	0.00954305		80.0708		0.38502		1263.01	1284.98
	AB	LH18-1	#46	38.0465	bdl	bdl	18.9738	0.27155	42.4654	0.350109	bdl	100.166		0.968473	-	-	-	0.403908	0.00585475	1.61145	0.00954881		79.6188		0.395989		1262.11	1284.06
	AB	LH18-1	#47	37.35	bdl	bdl	18.6812	0.267871	42.0767	0.363012	0.0546609	98.797		0.962953	-	-	0.00111421	0.402786	0.00584958	1.6172	0.0100279		79.9611		0.387673		1260.67	1282.59
	AB	LH18-1	#50	38.4201	bdl	bdl	19.4544	0.243348	42.1903	0.338573	bdl	100.693		0.975213	-	-	-	0.412966	0.00523183	1.59647	0.00920802		80.0625		0.385221		1265.38	1287.39
	AB	LH18-1	#52	38.0875	bdl	bdl	19.3276	0.294432	42.2317	0.404123	bdl	100.419		0.969019	-	-	-	0.41123	0.00634485	1.60176	0.0110163		79.4513		0.400084		1264.43	1286.41
	AB	LH27-1	#98	37.371	bdl	bdl	23.9832	0.374123	37.6562	0.417532	0.0437847	99.92		0.980074	-	-	0.000907863	0.526002	0.00831044	1.47221	0.0117324		73.6794		0.549831
	AB	LH27-1	#124	38.4975	bdl	bdl	17.3213	0.243021	43.1628	0.343242	bdl	99.633		0.979288	-	-	-	0.368481	0.00523609	1.6368	0.00935515		81.6269		0.346441		1238.12	1259.65
	AB	LH27-1	#125	37.9426	bdl	bdl	19.3939	0.329431	41.3778	0.260422	0.0548224	99.377		0.97739	-	-	0.00111654	0.417795	0.00718772	1.58897	0.00718772		79.1833		0.404629
	AB	LH27-1	#133	36.5735	bdl	bdl	26.0977	0.360191	35.3133	0.596246	0.0461728	99.036		0.979219	-	-	0.000977403	0.584348	0.0081683	1.40949	0.0171046		70.6956		0.638001
	AB	LH27-1	#135	36.7122	bdl	bdl	26.0131	0.429206	36.0562	0.617125	bdl	99.937		0.972053	-	-	-	0.576006	0.00962567	1.4232	0.0175076		71.1916		0.622831
	AB	LH27-1	#140	36.0108	0.04054	bdl	29.9486	0.441025	31.4687	0.564463	bdl	98.524		0.991118	0.000839278	-	-	0.689327	0.0102812	1.29116	0.0166457		65.1977		0.821591
	AB	LH27-1	#6	38.5016	bdl	bdl	19.33	0.30464	42.0399	0.309997	0.0416631	100.557		0.978991	-	-	0.000837579	0.411042	0.00656104	1.59356	0.00844559		79.4977		0.396942		1247.27	1268.96
	AB	LH27-1	#9	37.681	bdl	bdl	21.3462	0.358514	39.6937	0.378719	bdl	99.557		0.979008	-	-	-	0.46381	0.00788959	1.53742	0.0105427		76.8266		0.464256
	AB	LH27-1	#10	37.2258	bdl	bdl	24.8159	0.35923	36.0207	0.418623	bdl	98.936		0.992772	-	-	-	0.553467	0.00811454	1.43208	0.0119619		72.1283		0.594753
	AB	LH27-1	#20	37.4387	bdl	0.204234	21.9442	0.337272	37.9439	0.424617	0.073602	98.425		0.990321	-	0.00636705	0.00153929	0.485435	0.0075565	1.49626	0.0120344		75.507		0.49927
	AB	LH27-1	#36	36.2882	0.0516966	bdl	27.4277	0.385642	34.369	0.457287	0.0622987	99.107		0.977537	0.00104751	-	0.00132685	0.617891	0.00879909	1.3802	0.0131986		69.0793		0.688939
	AB	LH27-1	#52	36.0284	0.0545571	bdl	29.1328	0.439079	32.7891	0.426096	bdl	98.93		0.981118	0.00111753	-	-	0.663462	0.0101276	1.33111	0.0124325		66.7402		0.767028
	AB	LH27-1	#75	36.7068	0.0519551	bdl	28.0882	0.446014	33.9693	0.520364	bdl	99.848		0.984694	0.00104836	-	-	0.630137	0.0101342	1.35847	0.0149567		68.3161		0.713831
	AB	LH27-1	#6	36.0255	0.0825638	bdl	30.0295	0.491867	33.0704	0.342944	bdl	100.094		0.970896	0.00167372	-	-	0.67681	0.0112279	1.32865	0.00990283		66.2553		0.783909
	AB	LH27-1	#11	35.9313	0.0648754	bdl	30.4074	0.518521	32.1845	0.496195	bdl	99.661		0.97666	0.00132641	-	-	0.691201	0.0119377	1.30414	0.0144509		65.3629		0.815623
	AB	LH27-1	#12	37.5855	bdl	bdl	21.4308	0.279545	39.9202	0.366636	0.0510472	99.666		0.974445	-	-	0.00104637	0.464656	0.00613868	1.5429	0.0101846		76.8575		0.463451
	AB	LH27-1	#27	38.1837	bdl	bdl	20.1832	0.400221	40.6633	0.402438	bdl	99.885		0.983332	-	-	-	0.434677	0.00872986	1.56111	0.0111044		78.223		0.428493
	AB	LH27-1	#49	36.4346	bdl	bdl	27.9374	0.393091	34.3389	0.41271	bdl	99.589		0.977505	-	-	-	0.626826	0.00893273	1.37341	0.0118638		68.6658		0.702358
	AB	LH27-1	#50	37.7827	bdl	bdl	20.8407	0.347897	40.4341	0.375944	0.04787	99.871		0.974979	-	-	0.000976653	0.449749	0.00760394	1.55546	0.0103944		77.5737		0.444961
	AB	LH27-1	#56	36.6626	bdl	bdl	26.0046	0.411032	35.6853	0.43731	0.052973	99.308		0.977799	-	-	0.00111701	0.580006	0.00928512	1.41881	0.0124965		70.9858		0.629099
	AB	LH27-1	#77	37.4	bdl	bdl	26.8247	0.397295	34.8312	0.529992	bdl	100.063		0.995568	-	-	-	0.597159	0.00895773	1.38222	0.0151162		69.8344		0.664849
	AB	LH27-1	#89	36.7882	bdl	bdl	27.09	0.395098	34.1857	0.460025	0.0459362	98.996		0.991655	-	-	0.000978998	0.610685	0.00902077	1.37374	0.0132864		69.2296		0.684104
	AB	LH27-1	#90	37.4741	bdl	bdl	23.4493	0.368692	37.3335	0.432248	bdl	99.123		0.989933	-	-	-	0.518037	0.00824944	1.47022	0.0122343		73.9482		0.542237
	AB	LH27-1	#96	36.3186	0.0720754	bdl	29.5645	0.414525	32.8048	0.469849	bdl	99.684		0.982677	0.00146689	-	-	0.668972	0.00949986	1.3232	0.0136211		66.4236		0.778021
	AB	LH27-1	#97	36.9234	0.0422653	bdl	24.8208	0.450411	37.1762	0.42282	bdl	99.856		0.971806	0.000836742	-	-	0.546323	0.0100409	1.45865	0.0119236		72.7548		0.57638
	AB	LH27-1	#106	38.4118	bdl	bdl	20.2638	0.317425	40.5371	0.395406	bdl	100.011		0.988883	-	-	-	0.436272	0.00692162	1.55576	0.0109068		78.1018		0.431545
	AB	LH27-1	#111	37.2096	bdl	0.420513	27.8941	0.458194	33.5352	0.719527	bdl	100.392		0.994603	-	0.0132474	-	0.623537	0.0103736	1.3363	0.020607		68.1877		0.718073
	AB	LH27-1	#112	36.021	bdl	bdl	30.8873	0.44604	31.3957	0.490786	0.0452013	99.305		0.98591	-	-	0.000978155	0.706996	0.0103405	1.28103	0.0143928		64.441		0.849312
	AB	LH27-1	#113	37.3541	bdl	bdl	23.4433	0.332415	37.8484	0.36938	0.0537533	99.423		0.982076	-	-	0.00111734	0.515445	0.00740241	1.48341	0.0104053		74.2161		0.534725
	AB	LH27-1	#115	38.8432	bdl	bdl	17.7108	0.331655	42.8526	0.300736	0.0418002	100.163		0.986018	-	-	0.000838926	0.375979	0.00713087	1.62164	0.00817953		81.1811		0.356795		1241.53	1263.12
	AB	LH27-1	#116	38.6958	bdl	bdl	20.4118	0.244324	40.4653	0.381203	0.0413281	100.288		0.99417	-	-	0.000839494	0.438565	0.00531679	1.54984	0.0104937		77.9467		0.435468
	AB	LH27-1	#118	37.8585	0.0430853	bdl	23.4583	0.401756	38.758	0.385652	bdl	100.953		0.978546	0.000837677	-	-	0.507074	0.00879561	1.49344	0.0106804		74.6558		0.52251
	AB	LH27-1	#119	38.5246	bdl	bdl	21.0969	0.347005	40.1343	0.360672	0.0585156	100.576		0.989815	-	-	0.00118867	0.453304	0.00755157	1.53723	0.00992891		77.2299		0.453795
	AB	LH27-1	#122	38.1913	bdl	bdl	22.5525	0.402246	39.0029	0.444167	0.0547207	100.683		0.987048	-	-	0.00111815	0.487444	0.00880544	1.50273	0.0122997		75.5104		0.499178
	AB	LH27-1	#126	37.6313	0.0603183	bdl	23.1436	0.346607	38.0417	0.473272	0.0506345	99.76		0.985256	0.0011879	-	0.00104814	0.506743	0.0076864	1.4848	0.0132765		74.5583		0.525206
	AB	LH27-1	#127	37.5051	0.0532247	bdl	25.264	0.400193	36.93	0.438421	bdl	100.711		0.982131	0.00104839	-	-	0.55327	0.00887636	1.44167	0.0123011		72.2696		0.590582
	AB	LH27-1	#130	37.9813	bdl	bdl	20.9229	0.350951	40.1046	0.390929	bdl	99.868		0.981723	-	-	-	0.45227	0.00768335	1.54533	0.0108265		77.3621		0.450388
	AB	LH27-1	#142	37.9391	bdl	bdl	23.0112	0.324028	38.5821	0.416872	0.0544519	100.396		0.985532	-	-	0.00111833	0.499895	0.00712938	1.49409	0.0116027		74.9329		0.514887
	AB	LH27-1	#152	38.121	bdl	bdl	18.8536	0.357552	41.2449	0.383599	bdl	99.006		0.984841	-	-	-	0.407335	0.00782396	1.58847	0.0106182		79.5931		0.394623		1248.42	1270.13
	AB	LH27-1	#157	36.9529	bdl	bdl	23.1463	0.391614	37.4617	0.420143	0.0499448	98.558		0.981037	-	-	0.00104834	0.513896	0.00880606	1.48263	0.0119511		74.2636		0.533399
	AB	LH27-1	#159	38.3676	bdl	bdl	20.9511	0.345835	40.0772	0.379707	bdl	100.205		0.988954	-	-	-	0.451622	0.00755034	1.53999	0.0104866		77.3266		0.451303
	AB	LH27-1	#162	39.5651	bdl	bdl	14.9878	0.218496	45.4813	0.266939	bdl	100.566		0.98584	-	-	-	0.312311	0.0046113	1.68941	0.00712655		84.4		0.284487		1227.17	1248.51
	AB	LH27-1	#163	39.0776	bdl	bdl	14.6888	0.161731	45.8196	0.331371	bdl	100.156		0.975187	-	-	-	0.306551	0.00341853	1.70459	0.00886026		84.7594		0.276754		1224.17	1245.46
	AB	LH27-1	#164	39.0791	bdl	bdl	18.3803	0.269794	42.2965	0.285226	bdl	100.382		0.992935	-	-	-	0.390556	0.00580623	1.6021	0.00776495		80.4027		0.37515		1245.6	1267.26
	AB	LH27-1	#165	38.3024	bdl	bdl	21.3785	0.416459	39.8848	0.379868	bdl	100.464		0.986857	-	-	-	0.46064	0.00908837	1.53195	0.0104866		76.8852		0.462731
	AB	LH27-1	#166	39.8136	bdl	bdl	14.3851	0.234844	45.4399	0.277166	0.0460655	100.236		0.994101	-	-	0.000909388	0.300378	0.00496666	1.69139	0.00741501		84.9211		0.273297		1226.71	1248.04
	AB	LH27-1	#167	39.2501	bdl	bdl	14.5482	0.250326	45.5165	0.286416	0.0458719	99.922		0.982518	-	-	0.000907863	0.304553	0.00530751	1.69854	0.00768192		84.7979		0.275929		1225.28	1246.59
	AB	LH27-1	#168	39.3359	bdl	bdl	15.0848	0.210468	44.9981	0.283365	0.0598917	99.992		0.986977	-	-	0.00118812	0.316529	0.00447292	1.68315	0.00761794		84.1731		0.289402		1228.43	1249.79
	AB	LH27-1	#170	39.7424	bdl	bdl	14.8066	0.168722	45.373	0.266756	0.0425298	100.4		0.991679	-	-	0.000839043	0.308978	0.00356593	1.68781	0.00713187		84.5283		0.281718		1227.44	1248.78
	AB	LH27-1	#179	37.7489	bdl	bdl	22.6207	0.326305	38.764	0.408213	0.0475144	99.976		0.982745	-	-	0.000977995	0.49249	0.00719525	1.50444	0.0113867		75.3405		0.503773
	AB	LH27-1	#180	38.0724	bdl	bdl	20.7595	0.277762	40.2629	0.376055	bdl	99.819		0.983308	-	-	-	0.448387	0.00607627	1.55022	0.0104065		77.5678		0.445114
	AB	LH27-1	#185	39.843	bdl	bdl	13.7336	0.218867	46.0352	0.241178	0.0532891	100.176		0.992236	-	-	0.00104924	0.286024	0.00461668	1.70908	0.00643537		85.6657		0.257544		1223.29	1244.56
	AB	LH27-1	#186	39.5801	bdl	bdl	17.2357	0.239269	43.2156	0.303153	bdl	100.647		0.9979	-	-	-	0.363407	0.00510954	1.62427	0.00818926		81.7194		0.344306		1240.69	1262.26
	AB	LH27-1	#189	39.2158	bdl	bdl	14.1772	0.214793	46.0779	0.266452	0.0460214	100.045		0.977853	-	-	0.000907293	0.295638	0.00453647	1.71283	0.00711876		85.2824		0.265617		1222.48	1243.74
	AB	LH27-1	#190	39.462	bdl	bdl	16.1361	0.282563	44.1252	0.303889	0.0492783	100.411		0.991978	-	-	0.000979386	0.339217	0.00601623	1.65355	0.00818487		82.9799		0.315697		1234.67	1256.14
	AB	LH27-1	#191	39.6997	bdl	bdl	14.8782	0.240819	45.0214	0.281647	0.0530116	100.214		0.993891	-	-	0.00104929	0.3115	0.00510656	1.68027	0.00755491		84.3627		0.285292		1228.97	1250.34
	AB	LH27-1	#192	38.5265	bdl	bdl	19.0966	0.258111	41.7313	0.336669	bdl	100.022		0.984841	-	-	-	0.408243	0.00558854	1.59029	0.0092211		79.5755		0.395051		1248	1269.7
	AB	LH27-1	#194	39.6435	bdl	bdl	14.6417	0.242269	45.7808	0.278095	0.0426646	100.661		0.985558	-	-	0.000838594	0.30441	0.00510145	1.69669	0.00740758		84.7899		0.276101		1225.83	1247.15
	AB	LH27-1	#196	38.6165	bdl	bdl	20.3456	0.345124	40.8579	0.354421	0.0483761	100.597		0.987863	-	-	0.000978428	0.435261	0.00747799	1.55815	0.00971439		78.1677		0.429884
	AB	LH27-1	#201	39.1049	bdl	bdl	13.9591	0.174295	45.8766	0.265169	bdl	99.481		0.980423	-	-	-	0.292681	0.00370129	1.71467	0.00712324		85.4215		0.262678		1222.3	1243.56
	AB	LH27-1	#206	39.4228	bdl	bdl	13.6462	0.165401	46.2999	0.292886	0.0496143	99.901		0.982702	-	-	0.000977813	0.284474	0.00349219	1.72053	0.0078225		85.8138		0.254443		1221.02	1242.25
	AB	LH27-1	#207	39.8471	bdl	bdl	14.0745	0.248861	45.9157	0.262306	bdl	100.382		0.991399	-	-	-	0.292847	0.00524439	1.70303	0.00699252		85.3294		0.264624		1224.48	1245.78
	AB	LH27-1	#213	39.0729	bdl	bdl	13.6197	0.210372	46.0179	0.283235	0.0493001	99.315		0.980119	-	-	0.000977745	0.285711	0.00446969	1.72083	0.00761244		85.763		0.255505		1221.11	1242.34
	AB	LH27-1	#219	39.6991	bdl	0.0548096	13.944	0.222164	46.0105	0.254263	bdl	100.258		0.9883	-	0.00160813	-	0.290302	0.00468455	1.70755	0.00678211		85.4713		0.261629		1223.71	1244.99
	AB	LH27-1	#222	39.4453	bdl	bdl	15.0219	0.165202	45.3919	0.253355	0.046015	100.377		0.984746	-	-	0.000908244	0.313624	0.00349325	1.68933	0.0067769		84.3441		0.285696		1227.18	1248.52
	AB	LH27-1	#51	38.5051	bdl	bdl	13.2391	0.16633	46.1419	0.239771	bdl	98.38		0.972059	-	-	-	0.279504	0.00355657	1.73651	0.00648551		86.1377		0.247697		1217.91	1239.09
	AB	LH27-1	#52	38.8064	bdl	bdl	13.0411	0.25857	46.2474	0.206992	bdl	98.653		0.976877	-	-	-	0.274542	0.00551317	1.73553	0.00558295		86.3436		0.243437		1218.1	1239.28
	AB	LH27-1	#53	38.7413	bdl	bdl	13.3125	0.245347	46.0981	0.256016	0.052568	98.738		0.975534	-	-	0.00104656	0.280339	0.0052328	1.73045	0.0069073		86.0602		0.249307		1219.05	1240.24
	AB	LH27-1	#54	38.3541	bdl	bdl	13.5184	0.224846	46.0198	0.275634	0.0488737	98.465		0.968587	-	-	0.000975836	0.285502	0.00480948	1.73253	0.00745818		85.8544		0.253594		1218.7	1239.89
	AB	LH27-1	#55	35.2853	0.0502427	bdl	30.0396	0.511627	31.545	0.362125	bdl	97.813		0.977366	0.0010468	-	-	0.695845	0.0120033	1.30257	0.0107472		65.1838		0.822093
	AB	LH27-1	#56	38.2038	bdl	bdl	20.6354	0.351282	40.1297	0.398871	0.0513174	99.834		0.987462	-	-	0.00104871	0.44605	0.00769052	1.54628	0.0110464		77.6144		0.44392
	AB	LH27-1	#57	37.3723	bdl	bdl	20.6833	0.326062	40.2208	0.335336	0.0406963	99.037		0.971967	-	-	0.00083682	0.449861	0.00718271	1.55941	0.00934449		77.6136		0.443943
	AB	LH27-1	#58	37.6127	bdl	bdl	20.7444	0.390647	40.1645	0.40422	bdl	99.395		0.975829	-	-	-	0.450087	0.00858439	1.55343	0.0112365		77.5379		0.445879
	AB	LH27-1	#59	37.937	bdl	bdl	19.9568	0.328725	40.7234	0.373396	0.0547049	99.463		0.98021	-	-	0.00111753	0.431226	0.00719408	1.56859	0.0103371		78.4394		0.423064

## Sheet: S3b - Ol gm
	Table S3b. Olivine: complete dataset for the EMPA, chemical formulae and thermobarometry results of Olivine groundmass from LHPCS lavas
	Rock Type	Sample	Spot																						KD opx-liq(Mg-Fe)		T (°C)	T (°C)
		(thin section)		SiO2	TiO2	Al2O3	FeOtot	MnO	MgO	CaO	Cr2O3	Total		Si	Ti	Al	Cr	Fe2+	Mn	Mg	Ca		XFo				[eq. 2]	[eq. 2]
				(wt%)										(apfu)									(Mg#)				(P= 1kbar)	(P= 15kbar)
	TR	LH5-1	#3	34.3391	0.0494354	0.0967561	33.2059	0.567796	29.2272	0.310033	bdl	97.871		0.965835	0.00104588	0.00320736	-	0.781063	0.0135267	1.22549	0.00934319		61.0782		0.324896		898.131	913.748
	TR	LH5-1	#4	34.3678	bdl	bdl	33.5649	0.530267	29.2692	0.294125	bdl	98.074		0.964753	-	-	-	0.787963	0.012608	1.22485	0.00884648		60.8565		0.327937		898.108	913.724
	TR	LH5-1	#5	34.4741	0.0492846	bdl	34.6414	0.568981	28.0771	0.449791	bdl	98.275		0.972847	0.00104615	-	-	0.817529	0.0135999	1.18117	0.0135999		59.1008		0.352825		904.769	920.501
	TR	LH5-1	#6	34.1739	0.0428545	bdl	35.5297	0.661615	28.248	0.226796	bdl	98.917		0.959638	0.000905187	-	-	0.834374	0.0157363	1.18252	0.00682372		58.6347		0.359683		904.656	920.386
	TR	LH5-1	#7	35.4193	bdl	bdl	33.6007	0.653158	30.4989	0.147524	bdl	100.384		0.968378	-	-	-	0.768262	0.0151255	1.24308	0.00432156		61.8072		0.315051		895.477	911.047
	TA	LH4	#45	33.9706	0.090791	bdl	39.4658	0.708376	24.7507	0.302756	bdl	99.341		0.971653	0.00195335	-	-	0.944027	0.0171616	1.05537	0.00927842		52.7883		0.681564
	TA	LH4	#46	34.4802	0.0620955	bdl	37.4322	0.667542	26.0942	0.3258	bdl	99.069		0.979105	0.00132632	-	-	0.888915	0.0160555	1.10462	0.00991251		55.414		0.613161
	TA	LH4	#47	34.4863	0.0779612	bdl	39.9986	0.594263	24.1184	0.385399	bdl	99.693		0.986487	0.00167746	-	-	0.956852	0.0143982	1.02849	0.0118121		51.8082		0.708874
	TA	LH4	#48	33.9634	0.0876684	bdl	41.0472	0.657442	24.0031	0.30545	bdl	100.136		0.970141	0.00188363	-	-	0.980536	0.0159062	1.02212	0.0093484		51.0421		0.730953
	TA	LH4	#49	35.8449	0.0758347	1.35729	40.8838	0.647107	21.6474	0.703671	bdl	101.446		1.02141	0.00162544	0.045583	-	0.974276	0.0156184	0.919576	0.0214841		48.5598		0.807273
	TA	LH4	#50	35.5827	0.0698797	bdl	36.3678	0.629441	26.8641	0.586357	bdl	100.153		0.9951	0.00146997	-	-	0.850553	0.0149097	1.11998	0.0175696		56.8403		0.578653
	TA	LH4	#51	34.6756	0.0492935	bdl	37.5414	0.57784	26.3511	0.329907	bdl	99.527		0.979221	0.00104707	-	-	0.886591	0.0138213	1.10934	0.00998208		55.584		0.608955
	TA	LH4	#52	35.5783	bdl	bdl	33.7113	0.467954	29.9708	0.343842	bdl	100.106		0.977067	-	-	-	0.77423	0.010885	1.227	0.0101175		61.3161		0.480784
	TA	LH4	#53	34.7986	bdl	bdl	35.7168	0.574033	27.5694	0.294033	bdl	99.01		0.979335	-	-	-	0.840617	0.0136833	1.15666	0.00886624		57.9157		0.553756
	TA	LH4	#54	35.1158	0.0471221	bdl	34.0098	0.591841	29.9022	0.300093	bdl	99.988		0.966416	0.000975474	-	-	0.782748	0.013796	1.2268	0.00884894		61.0523		0.486156
	TA	LH4	#55	35.481	0.0437445	bdl	33.0322	0.612601	30.0555	0.304738	bdl	99.536		0.978387	0.000907335	-	-	0.761743	0.014308	1.23551	0.00900356		61.8643		0.469773
	TA	LH4	#56	35.6002	bdl	bdl	33.4633	0.59194	30.6087	0.310368	bdl	100.617		0.970344	-	-	-	0.762777	0.0136658	1.24373	0.00906408		61.9886		0.467302
	TA	LH4	#57	33.7633	0.0868958	bdl	40.8389	0.708811	23.6016	0.307277	bdl	99.339		0.973047	0.00188372	-	-	0.984279	0.0173023	1.014	0.00948837		50.7476		0.739616
	TA	LH4	#58	34.8624	0.115102	0.242829	38.3281	0.63886	23.0758	0.379334	bdl	97.696		1.01898	0.00253058	0.00836497	-	0.936876	0.0158161	1.00548	0.0118797		51.77		0.70996
	TA	LH4	#59	33.7835	0.0871414	bdl	40.6815	0.593301	23.9337	0.346664	bdl	99.461		0.970523	0.00188302	-	-	0.977357	0.0144365	1.02499	0.0106704		51.1934		0.72654
	TA	LH4	#60	34.9621	0.0426574	bdl	36.7063	0.57698	26.4327	0.274129	bdl	99.025		0.990629	0.000909154	-	-	0.869781	0.0138471	1.11651	0.00832226		56.2148		0.593571
	TA	LH4	#61	34.8058	0.0535483	bdl	34.3948	0.546874	29.5113	0.305439	bdl	99.658		0.963238	0.0011147	-	-	0.796034	0.012819	1.21753	0.00905692		60.4702		0.498171
	TA	LH15	#158	36.6144	bdl	0.0506799	29.4261	0.58868	33.1403	0.242376	bdl	100.136		0.985324	-	0.00160738	-	0.662241	0.0134181	1.32951	0.00698861		66.7544		0.499403
	TA	LH15	#168	36.282	0.0645806	bdl	31.223	0.492016	31.143	0.312591	bdl	99.557		0.992933	0.00132942	-	-	0.714596	0.011405	1.27057	0.00916597		64.0069		0.563884
	TA	LH15	#169	36.534	0.0581062	bdl	29.9499	0.464417	32.197	0.21356	bdl	99.429		0.99417	0.00118937	-	-	0.681576	0.0107043	1.30613	0.00622668		65.7141		0.523185
	TA	LH15	#170	36.4043	0.0480168	bdl	30.8828	0.523887	32.0378	0.25282	bdl	100.18		0.986186	0.000978428	-	-	0.699646	0.0120207	1.29383	0.00733821		64.9069		0.542162
	TA	LH15	#173	35.8391	0.134413	bdl	31.7596	0.49239	30.2565	0.287805	bdl	98.828		0.992093	0.00279877	-	-	0.735236	0.0115449	1.2486	0.00853624		62.9424		0.59038
	TA	LH15	#187	36.6689	0.0722518	bdl	31.834	0.614143	31.4685	0.229461	bdl	100.898		0.990839	0.00146853	-	-	0.719371	0.0140559	1.26762	0.00664336		63.7997		0.568972
	TA	LH17	#360	36.5274	0.0991324	0.922852	35.146	0.704287	27.7486	0.501557	bdl	101.94		1	0.00204139	0.0297762	-	0.80466	0.0163311	1.13248	0.0147121		58.4653		0.621869
	TA	LH17	#371	35.669	0.0835918	bdl	34.9254	0.546368	28.2271	0.309852	bdl	99.83		0.992512	0.0017496	-	-	0.812723	0.012877	1.1709	0.00923788		59.0322		0.60749
	TA	LH17	#374	37.131	0.0975101	0.446363	37.9973	0.659914	24.8327	0.325752	bdl	101.741		1.03684	0.00204812	0.01469	-	0.88733	0.0156081	1.03374	0.00974622		53.8145		0.751264
	TA	LH17	#375	36.2976	0.0444689	bdl	33.3516	0.610595	30.4065	0.290573	bdl	101.081		0.986481	0.00090907	-	-	0.758024	0.0140556	1.23193	0.00846134		61.9112		0.538535
	TA	LH17	#376	36.4987	0.0782849	bdl	33.3267	0.456427	29.869	0.310635	bdl	100.594		0.998273	0.00161057	-	-	0.762289	0.0105737	1.21787	0.00910322		61.5074		0.547817
	TA	LH17	#378	36.582	0.0477337	bdl	31.6514	0.617691	30.8563	0.268084	bdl	100.049		0.998553	0.000980072	-	-	0.722523	0.014281	1.25561	0.00784057		63.4782		0.503632
	TA	LH17	#379	36.498	bdl	bdl	31.7816	0.604856	31.1815	0.300346	bdl	100.434		0.991584	-	-	-	0.722093	0.0139187	1.26289	0.00874289		63.626		0.50043
	TA	LH21-2	#1	34.5685	0.05345	bdl	33.7338	0.53697	29.9679	0.342402	bdl	99.224		0.957297	0.00111338	-	-	0.781244	0.0125951	1.23717	0.0101596		61.298		0.50066
	TA	LH21-2	#2	34.3933	0.0663002	bdl	36.0215	0.559349	28.211	0.325814	bdl	99.585		0.960292	0.00139243	-	-	0.8411	0.0132281	1.17424	0.00974704		58.269		0.567907
	TA	LH21-2	#3	34.8924	0.0737108	bdl	33.6345	0.571286	29.9279	0.315188	bdl	99.435		0.964607	0.00153278	-	-	0.777607	0.013377	1.2334	0.00933603		61.3362		0.499853
	TA	LH21-2	#9	35.0941	0.0813821	bdl	32.0122	0.533009	31.627	0.342797	bdl	99.742		0.957859	0.00167081	-	-	0.730699	0.0123222	1.28687	0.0100248		63.7868		0.450184
	TA	LH21-2	#12	34.8792	0.0740412	bdl	32.9891	0.457284	30.7464	0.269347	bdl	99.485		0.959627	0.00153228	-	-	0.759037	0.0106563	1.26107	0.00794001		62.4296		0.477211
	TA	LH21-2	#15	35.0732	bdl	bdl	31.8549	0.479658	30.9597	0.273197	bdl	98.705		0.968932	-	-	-	0.735953	0.0112237	1.27504	0.00808663		63.4072		0.457628
	TA	LH21-2	#16	35.1202	bdl	bdl	33.5094	0.541896	29.8246	0.378951	bdl	99.434		0.970994	-	-	-	0.774787	0.01269	1.22926	0.0112258		61.3426		0.499719
	TA	LH21-2	#17	34.3013	bdl	0.0417324	39.1724	0.702633	25.1357	0.431503	bdl	99.933		0.973297	-	0.00139561	-	0.929545	0.0168869	1.06324	0.0131187		53.3585		0.693144
	TA	LH21-2	#18	34.8053	0.040039	bdl	35.6107	0.598546	28.5242	0.351358	bdl	99.969		0.966568	0.000836373	-	-	0.827033	0.0140789	1.18089	0.0104547		58.8153		0.555265
	TA	LH21-2	#19	35.0178	bdl	bdl	33.5025	0.457979	29.9038	0.333831	bdl	99.282		0.969231	-	-	-	0.775482	0.0107367	1.23388	0.00990007		61.4104		0.498292
	TA	LH21-2	#20	33.4853	0.0772583	bdl	37.9673	0.634645	25.5967	0.221471	bdl	98.039		0.963761	0.00167259	-	-	0.913862	0.0154715	1.09826	0.00682974		54.5862		0.65972
	TA	LH26-2	#221	36.422	0.0555527	bdl	31.076	0.36384	33.0879	0.194998	bdl	101.254		0.972886	0.00111618	-	-	0.694191	0.00823179	1.31758	0.00558088		65.497		0.489796
	TA	LH26-2	#222	35.9907	0.0720495	bdl	31.8776	0.435704	31.9465	0.233636	bdl	100.616		0.97318	0.00146542	-	-	0.720849	0.00997883	1.28776	0.00676886		64.1157		0.520381
	AB	LH5-2	#5	32.7416	0.0964881	bdl	48.4589	1.00415	14.8017	0.596938	bdl	97.783		1.01315	0.00224582	-	-	1.25401	0.0263183	0.682801	0.0197913		35.2575		2.85014
	AB	LH5-2	#9	33.7278	0.171975	bdl	44.6338	0.859074	17.4197	0.592878	bdl	97.441		1.02708	0.00393922	-	-	1.13668	0.0221581	0.790799	0.0193444		41.0316		2.23064
	AB	LH5-2	#50	33.9003	0.228404	bdl	40.9161	0.842337	21.9143	0.505537	bdl	98.357		0.994795	0.00504155	-	-	1.00411	0.0209364	0.958664	0.0158949		48.8463		1.62544
	AB	LH5-2	#51	32.2614	0.127929	bdl	48.3217	0.903462	16.1511	0.628671	bdl	98.478		0.984639	0.00293693	-	-	1.23337	0.0233556	0.734861	0.0205585		37.3399		2.60463
	AB	LH5-2	#52	33.5359	0.133411	0.116829	47.0271	0.851384	16.9587	0.585912	bdl	99.298		1.00868	0.00301832	0.00414142	-	1.1829	0.0216898	0.760406	0.0188821		39.1333		2.41413
	AB	LH5-2	#55	31.4766	0.114103	bdl	53.7485	1.27572	10.6672	0.573049	bdl	97.962		1.0032	0.00273543	-	-	1.4326	0.0344384	0.506827	0.0195689		26.1359		4.38654
	AB	LH5-2	#61	32.9317	0.143299	bdl	44.8422	0.777384	19.4121	0.457076	bdl	98.579		0.981745	0.00321334	-	-	1.11796	0.0196293	0.862711	0.0145997		43.5604		2.01104
	AB	LH5-2	#68	34.0743	0.236319	bdl	39.7221	0.618256	23.0132	0.627743	bdl	98.298		0.992652	0.00517845	-	-	0.96774	0.0152554	0.99944	0.0195941		50.8097		1.50266
	AB	LH5-2	#77	33.4053	0.12275	0.054237	42.9993	0.712758	20.6533	0.594384	bdl	98.588		0.986713	0.00272727	0.00188811	-	1.06217	0.0178322	0.909441	0.0188112		46.1308		1.8125
	AB	LH5-2	#81	33.9152	0.0639779	0.0612485	41.4148	0.735773	22.4742	0.40423	bdl	99.13		0.985504	0.00139837	0.00209756	-	1.00641	0.0181089	0.973547	0.0125854		49.1741		1.60426
	AB	LH5-2	#83	32.6769	0.0907438	bdl	46.8982	0.964348	16.0146	0.569098	bdl	97.314		1.00781	0.00210516	-	-	1.20963	0.0251918	0.736316	0.0188061		37.8423		2.54944
	AB	LH5-2	#85	33.1234	0.385706	bdl	45.648	0.828704	18.4021	0.469493	bdl	98.896		0.99141	0.00868368	-	-	1.1426	0.0210089	0.821098	0.0150564		41.8176		2.15953
	AB	LH5-2	#97	29.8096	0.210099	bdl	58.4351	1.68918	6.08918	0.715847	bdl	97.135		0.992401	0.00526119	-	-	1.6269	0.0476313	0.302203	0.0255343		15.6676		8.3545
	AB	LH5-2	#32	32.6572	0.144137	0.227044	52.6131	1.01858	13.3029	0.835347	bdl	100.996		0.993311	0.00329771	0.00813902	-	1.33831	0.0262413	0.603199	0.0272236		31.072		3.44313
	AB	LH5-2	#1	34.6444	0.0991983	bdl	36.6618	0.604914	27.2485	0.429448	bdl	99.716		0.971407	0.0020922	-	-	0.859683	0.0143664	1.13899	0.0129019		56.9912		1.17132
	AB	LH5-2	#10	32.5511	0.0944201	bdl	44.7914	0.814166	18.0638	0.431927	bdl	96.806		0.994795	0.00217051	-	-	1.14477	0.021075	0.822975	0.0141433		41.8271		2.15869
	AB	LH5-2	#11	32.7322	0.0491112	bdl	44.6365	0.883181	18.5029	0.549487	bdl	97.379		0.991676	0.00111919	-	-	1.13095	0.0226637	0.835688	0.0178372		42.4972		2.10018
	AB	LH5-2	#12	34.1819	bdl	bdl	39.408	0.72624	23.6427	0.405252	bdl	98.437		0.991048	-	-	-	0.955518	0.0178347	1.02189	0.0125892		51.6823		1.45108
	AB	LH5-2	#18	33.1515	0.301544	0.207696	48.0384	0.994269	13.35	0.626695	bdl	96.916		1.04426	0.00714471	0.00771063	-	1.26546	0.0265274	0.626895	0.0211512		33.1313		3.13265
	AB	LH5-2	#23	31.1565	0.116457	bdl	51.0036	1.16349	12.1517	0.723545	bdl	96.387		0.996731	0.00280236	-	-	1.36454	0.0315266	0.579529	0.0248009		29.8134		3.65401
	AB	LH5-2	#27	31.5996	0.120913	bdl	49.8069	1.03712	13.3521	0.757752	bdl	96.765		0.998271	0.00287323	-	-	1.31587	0.0277512	0.628816	0.0256488		32.3386		3.24748
	AB	LH5-2	#28	32.6589	0.109013	bdl	43.0639	0.802143	20.622	0.465742	bdl	97.799		0.973192	0.00244345	-	-	1.07316	0.0202457	0.916085	0.0148701		46.0558		1.81798
	AB	LH5-2	#29	32.2733	0.112049	bdl	46.0516	0.820254	17.0892	0.571891	bdl	96.968		0.991347	0.00258892	-	-	1.183	0.0213411	0.782554	0.0188222		39.8173		2.346
	AB	LH5-2	#30	32.2517	0.172659	bdl	46.055	0.86619	17.0874	0.550769	bdl	97.019		0.990322	0.00398787	-	-	1.18265	0.022528	0.782183	0.0181203		39.813		2.34642
	AB	LH18-1	#19	38.6843	bdl	bdl	19.8278	0.340127	42.3383	0.374876	0.0455472	101.644		0.974302	-	-	0.000906977	0.417628	0.00725581	1.58965	0.0101163		79.197		0.406338
	AB	LH18-1	#22	38.1099	bdl	bdl	20.6313	0.299657	41.114	0.387167	bdl	100.613		0.974029	-	-	-	0.440977	0.00648701	1.56651	0.0106024		78.0361		0.435395
	AB	LH18-1	#25	38.381	bdl	bdl	20.0591	0.315402	42.0144	0.370141	bdl	101.196		0.971714	-	-	-	0.424707	0.00676351	1.58573	0.0100407		78.8776		0.414247
	AB	LH18-1	#26	38.6013	bdl	bdl	19.933	0.321997	41.8546	0.395959	bdl	101.173		0.977923	-	-	-	0.42231	0.00690939	1.58071	0.0107479		78.919		0.413217
	AB	LH18-1	#29	38.482	bdl	bdl	19.6317	0.322567	42.3119	0.376054	0.0523585	101.214		0.972362	-	-	0.001046	0.414844	0.00690361	1.59383	0.0101811		79.3499		0.402572
	AB	LH18-1	#31	38.1761	bdl	bdl	19.7745	0.321455	42.2195	0.377324	0.0521779	100.959		0.967317	-	-	0.0010453	0.419024	0.00689895	1.59477	0.0102439		79.195		0.406387
	AB	LH18-1	#32	38.172	bdl	bdl	19.5372	0.307063	41.8822	0.385827	0.0415523	100.431		0.973084	-	-	0.000837482	0.416508	0.00663007	1.59163	0.0105383		79.2617		0.404743
	AB	LH18-1	#36	36.5806	0.0421481	bdl	26.1198	0.449162	36.5396	0.41425	0.0434405	100.189		0.964452	0.000835868	-	0.000905524	0.575913	0.0100304	1.43616	0.0117022		71.3804		0.620231
	AB	LH18-1	#38	38.0292	bdl	bdl	19.6089	0.317762	42.3372	0.351163	bdl	100.745		0.96497	-	-	-	0.416107	0.00682943	1.6015	0.00954726		79.3788		0.401863
	AB	LH18-1	#48	37.9151	bdl	bdl	19.9342	0.33464	42.4493	0.362137	bdl	101.08		0.959181	-	-	-	0.421739	0.00717054	1.60091	0.00981598		79.1518		0.407452
	AB	LH18-1	#49	38.3178	bdl	bdl	19.6432	0.256175	42.0752	0.317866	0.0660046	100.738		0.973212	-	-	0.00132543	0.417231	0.00551099	1.59309	0.00865016		79.2482		0.405074
	AB	LH18-1	#51	38.0895	bdl	bdl	19.7239	0.241617	41.6541	0.425299	bdl	100.183		0.973521	-	-	-	0.421587	0.00523061	1.58711	0.0116468		79.0145		0.410848
	AB	LH27-1	#99	33.1698	0.164072	bdl	44.726	0.764957	20.144	0.569272	bdl	99.566		0.975637	0.00363002	-	-	1.10017	0.0190576	0.883281	0.0179407		44.5364		1.91678
	AB	LH27-1	#100	29.6668	0.266902	bdl	60.611	1.40981	4.53392	0.903688	bdl	97.508		0.994671	0.00673117	-	-	1.69948	0.0400365	0.226616	0.0324639		11.7672		11.5408
	AB	LH27-1	#127	28.6981	0.215369	bdl	62.966	1.71896	2.02667	0.706839	bdl	96.387		0.992391	0.00560198	-	-	1.82092	0.0503478	0.104477	0.0261893		5.42706		26.8214
	AB	LH27-1	#139	34.6907	0.0779483	0.0787685	34.8681	0.674924	26.584	0.446897	bdl	97.48		0.993934	0.00167989	0.00265982	-	0.835464	0.0163789	1.13546	0.0137191		57.6145		1.13231
	AB	LH27-1	#18	31.586	0.110584	bdl	50.4281	0.987361	14.2811	0.547629	bdl	97.956		0.981397	0.00258446	-	-	1.31032	0.0259843	0.661482	0.0182309		33.5506		3.04839
	AB	LH27-1	#19	31.4831	0.220227	bdl	49.7052	0.893306	14.4801	0.503516	bdl	97.289		0.982832	0.00517133	-	-	1.29765	0.0236204	0.67388	0.0168418		34.1841		2.96338
	AB	LH27-1	#28	32.1683	0.0723316	bdl	48.5306	0.939437	15.3284	0.662243	bdl	97.754		0.993141	0.00167973	-	-	1.25301	0.0245661	0.705487	0.0219065		36.0255		2.73323
	AB	LH27-1	#37	35.0266	bdl	bdl	35.3584	0.645136	27.8558	0.479719	bdl	99.422		0.980148	-	-	-	0.827449	0.0152908	1.16203	0.0143831		58.4127		1.09581
	AB	LH27-1	#39	30.6326	0.0860131	bdl	56.8392	1.13305	8.3226	0.756811	bdl	97.822		0.994446	0.00210035	-	-	1.54313	0.0311552	0.402777	0.0263244		20.7013		5.89586
	AB	LH27-1	#51	30.0288	0.237463	bdl	58.9417	1.5903	5.56371	0.688399	bdl	97.127		1.00217	0.00596115	-	-	1.64507	0.0449541	0.276808	0.024616		14.405		9.14568
	AB	LH27-1	#74	30.5742	0.310456	bdl	59.4672	1.24833	6.81558	0.783005	bdl	99.285		0.990566	0.00756585	-	-	1.61125	0.0342565	0.329185	0.027181		16.9668		7.53239
	AB	LH27-1	#5	32.9842	0.152616	bdl	43.5957	0.815964	19.9806	0.478857	bdl	98.042		0.983972	0.00342458	-	-	1.08762	0.0206174	0.888573	0.0153058		44.9679		1.88362
	AB	LH27-1	#24	33.768	0.0956248	bdl	41.571	0.668044	22.1593	0.646701	bdl	98.952		0.984505	0.00209707	-	-	1.01358	0.016497	0.963115	0.0202018		48.7274		1.61954
	AB	LH27-1	#26	32.9982	0.15652	bdl	43.7827	0.678316	20.2602	0.569187	bdl	98.49		0.978905	0.0034926	-	-	1.0862	0.0170439	0.895991	0.0180916		45.206		1.86559
	AB	LH27-1	#28	35.7541	0.0473741	bdl	31.8238	0.528895	30.7399	0.608148	bdl	99.54		0.980936	0.000977654	-	-	0.730168	0.0122905	1.25726	0.0178771		63.2644		0.893731
	AB	LH27-1	#51	34.3183	0.0847127	bdl	38.7565	0.651031	25.1545	0.450607	bdl	99.44		0.97734	0.00181467	-	-	0.923039	0.0157039	1.06793	0.0137496		53.6427		1.33011
	AB	LH27-1	#55	34.0006	0.111997	bdl	40.055	0.565502	23.2257	0.523419	bdl	98.526		0.987878	0.00244767	-	-	0.973262	0.0139167	1.00599	0.0162945		50.8308		1.48883
	AB	LH27-1	#78	33.5654	0.0912672	bdl	44.5945	0.785356	19.7033	0.519207	bdl	99.285		0.991862	0.00202863	-	-	1.10204	0.0196568	0.867976	0.0164389		44.0633		1.95389
	AB	LH27-1	#93	33.154	0.183191	bdl	44.3799	0.785377	20.3559	0.569857	bdl	99.52		0.974829	0.0040516	-	-	1.09128	0.0195594	0.89226	0.0179528		44.9872		1.88215
	AB	LH27-1	#98	33.2221	0.100095	bdl	44.2243	0.811128	19.7348	0.557767	bdl	98.655		0.986929	0.00223667	-	-	1.09869	0.0204096	0.873978	0.0177535		44.3082		1.93458
	AB	LH27-1	#124	34.7544	0.123523	bdl	39.0874	0.611989	24.2382	0.508891	bdl	99.411		0.995123	0.00266038	-	-	0.935964	0.0148421	1.03461	0.0156122		52.5069		1.39217
	AB	LH27-1	#131	33.2698	0.1382	bdl	43.9074	0.856326	20.0907	0.608587	bdl	98.895		0.983975	0.00307449	-	-	1.08599	0.0214515	0.885801	0.0192854		44.9276		1.88669
	AB	LH27-1	#141	33.0251	0.186565	bdl	45.6653	0.798034	18.5807	0.567557	bdl	98.843		0.987344	0.00419551	-	-	1.14174	0.0202084	0.828124	0.0181805		42.0436		2.12169
