# Supplementary material for: Anatomy of the magmatic plumbing system of Los Humeros Caldera (Mexico): implications for geothermal systems
Source: Copernicus journal article supplement (doi:10.5194/se-2019-86), 2019-05-22
Supplement: Supplementary file 5 [file S-Table4 - Opx.xlsx]

## Sheet: S4a - Opx pheno
	Table S4a. Orthopyroxene: complete dataset for the EMPA, chemical formulae and thermobarometry results of Orthopyroxene phenocrysts from LHPCS lavas
	Rock Type	Sample	Spot																													KD opx-liq(Mg-Fe)	iKD opx-liq(Mg-Fe)		T (°C)	P (kbar)
		(thin section)		SiO2	TiO2	Al2O3	FeOtot	MnO	MgO	CaO	Na2O	Cr2O3	Total		Si	Al[IV]	Al[VI]	AlTot	Ti	Cr	Fe3+	Fe2+	Mn	Mg	Ca		XWo	XEn	XFs		Mg#				[eq. 28a]	[eq. 29a]
				(wt%)											(apfu)
	TR	LH5-1	#4	52.1316	0.187304	0.491702	22.9532	0.822275	21.6316	1.49109	bdl	bdl	99.751		1.95582	-	0.0217413	0.0217413	0.00528573	-	0.0571457	0.66301	0.0261295	1.20983	0.0599382		0.0297304	0.600099	0.35721		62.6898	0.303438	0.251272		997.799	0.660725
	TR	LH5-1	#5	51.9382	0.175287	0.331143	22.5865	0.868616	21.6017	1.31917	bdl	bdl	98.833		1.96547	-	0.014769	0.014769	0.00498952	-	0.044307	0.670492	0.0278415	1.21864	0.0534877		0.0265478	0.604854	0.35478		63.0334	0.299004	0.251272		999.067
	TR	LH5-1	#7	52.3444	0.130488	0.234087	22.6423	0.886339	21.7095	1.43848	bdl	bdl	99.413		1.96852	-	0.0103754	0.0103754	0.00369123	-	0.0471879	0.664921	0.0282329	1.21711	0.0579623		0.0287595	0.603901	0.353331		63.0919	0.298254	0.251272		999.9	1.46868
	TR	LH5-1	#8	51.9943	0.151217	0.291775	22.9162	0.902553	21.6388	1.38006	bdl	bdl	99.275		1.95987	-	0.0129621	0.0129621	0.00428746	-	0.0587282	0.663659	0.0288157	1.21594	0.055737		0.0275532	0.601094	0.357108		62.7352	0.302849	0.251272		996.686
	TR	LH5-1	#9	51.8924	0.230158	0.440678	21.8776	0.857839	21.3892	1.36117	bdl	bdl	98.078		1.97692	-	0.0197861	0.0197861	0.00659538	-	0.01429	0.682722	0.0276806	1.21475	0.0555611		0.0278501	0.608896	0.349379		63.5445	0.292498	0.251272		1005.03	0.898722
	TR	LH5-1	#10	52.2355	0.2189	0.448416	22.6358	0.893599	21.6233	1.45991	bdl	bdl	99.545		1.96293	-	0.0198598	0.0198598	0.00618747	-	0.0430129	0.668347	0.0284424	1.21135	0.058781		0.0292453	0.602681	0.353923		63.0059	0.299357	0.251272		1000.48	0.620984
	TR	LH5-1	#15	52.5927	0.184736	0.26755	22.9811	0.845526	21.8403	1.42909	0.0413478	bdl	100.218		1.96329	-	0.0117712	0.0117712	0.00518729	-	0.054267	0.663175	0.0267345	1.21542	0.05716		0.0283425	0.602661	0.35574		62.8856	0.300905	0.251272		998.374	2.06469
	TR	LH5-1	#16	52.1538	0.176913	0.309374	23.4897	0.970938	21.6128	1.32395	0.043926	bdl	100.102		1.95242	-	0.0136498	0.0136498	0.00498169	-	0.0744265	0.660971	0.0307869	1.20617	0.0531048		0.0262187	0.595504	0.363077		62.1272	0.310802	0.251272		992.841	2.22517
	TR	LH5-1	#31	52.5245	0.116675	0.189548	22.992	0.929395	21.5699	1.37757	0.0713265	bdl	99.798		1.97052	-	0.00838093	0.00838093	0.00329251	-	0.0491881	0.672171	0.0295328	1.20636	0.055374		0.0275134	0.599395	0.358418		62.5833	0.304821	0.251272		997.422	2.85534
	TR	LH5-1	#32	51.5098	0.172085	0.325005	22.6928	0.873272	21.5531	1.88364	0.122623	bdl	99.242		1.94145	-	0.0144372	0.0144372	0.00487878	-	0.101857	0.613432	0.0278787	1.21103	0.0760691		0.0374675	0.596489	0.352312		62.8713	0.301089	0.251272		998.758	3.629
	TR	LH5-1	#33	52.373	0.140967	0.274404	22.6735	0.901349	21.5445	1.39291	bdl	bdl	99.38		1.97294	-	0.0121829	0.0121829	0.00399441	-	0.0356501	0.67865	0.0287597	1.20991	0.0562213		0.0279821	0.602187	0.355517		62.8819	0.300953	0.251272		999.712	1.24559
	TR	LH5-1	#34	51.7237	0.232002	0.385877	23.5799	0.861588	21.3423	1.31038	0.0640955	bdl	99.531		1.94913	-	0.0171379	0.0171379	0.00657616	-	0.0761241	0.666982	0.0275003	1.19895	0.0529082		0.0261602	0.592817	0.367425		61.7399	0.315949	0.251272		990.988	2.79687
	TR	LH5-1	#35	51.8069	0.157479	0.263552	23.4499	0.944776	21.0196	1.41511	0.0515914	bdl	99.109		1.96241	-	0.0117659	0.0117659	0.00448699	-	0.0582311	0.684615	0.0303121	1.18696	0.0574334		0.0284669	0.588317	0.368192		61.5104	0.319031	0.251272		991.737	2.49791
	TR	LH5-1	#36	51.367	0.167822	0.229837	23.7866	0.987368	21.2436	1.36471	bdl	bdl	99.191		1.94406	-	0.0102518	0.0102518	0.00477755	-	0.0941575	0.658704	0.0316512	1.19857	0.0553399		0.0271484	0.587988	0.369336		61.4237	0.3202	0.251272		987.748	1.83433
	TR	LH5-1	#37	51.6622	0.241789	0.418218	23.1469	0.852671	21.3181	1.42191	bdl	bdl	99.084		1.95409	-	0.0186436	0.0186436	0.00687919	-	0.0600184	0.672167	0.0273174	1.20206	0.0576257		0.028539	0.595319	0.362613		62.15	0.310501	0.251272		994.449	0.429044
	TR	LH5-1	#53	53.1834	0.110929	0.226095	22.3719	0.819871	22.7514	0.944553	bdl	bdl	100.426		1.97201	-	0.00988049	0.00988049	0.00309389	-	0.0395219	0.654208	0.0257491	1.25762	0.0375259		0.0186268	0.624245	0.344348		64.4523	0.281197	0.251272		1003.61
	TR	LH5-1	#54	53.2087	0.121851	0.219581	22.3483	0.585615	23.1228	0.805113	bdl	bdl	100.412		1.96927	-	0.00957797	0.00957797	0.0033922	-	0.0450963	0.646613	0.0183578	1.27577	0.0319266		0.0158228	0.632269	0.342811		64.8464	0.276389	0.251272		1003.6
	TR	LH5-1	#55	53.0915	0.189969	0.368303	22.3931	0.563408	22.9178	0.936064	bdl	bdl	100.492		1.96463	-	0.0160627	0.0160627	0.00528771	-	0.0456938	0.647295	0.0176589	1.26426	0.0371137		0.018446	0.628353	0.344424		64.5974	0.279421	0.251272		1003.79	1.22844
	TR	LH5-1	#56	53.0963	0.179122	0.471	22.0882	0.559934	22.8462	1.05881	bdl	bdl	100.343		1.96671	-	0.0205614	0.0205614	0.00499064	-	0.0374298	0.646787	0.0175671	1.26153	0.0420212		0.0209547	0.629088	0.341198		64.839	0.27648	0.251272		1006.72	1.27335
	TR	LH5-1	#57	53.2356	0.118106	0.290091	22.4272	0.581636	22.7625	0.914564	bdl	bdl	100.355		1.97454	-	0.012681	0.012681	0.00329506	-	0.0322516	0.663405	0.0182726	1.25861	0.0363455		0.0180924	0.626522	0.34629		64.4069	0.281755	0.251272		1003.37	-0.324794
	TR	LH5-1	#58	53.2677	0.157705	0.251627	22.0474	0.760734	23.0146	0.87061	bdl	bdl	100.395		1.97255	-	0.0109819	0.0109819	0.00439275	-	0.0355414	0.647232	0.0238606	1.2705	0.034543		0.0171712	0.631563	0.339404		65.0483	0.273949	0.251272		1006.5	-0.96108
	TR	LH5-1	#59	52.5083	0.224174	0.472368	22.3619	0.704681	22.6348	0.994222	bdl	bdl	99.913		1.95671	-	0.0207461	0.0207461	0.00628366	-	0.0532615	0.643627	0.0222422	1.25743	0.0396968		0.0196884	0.623646	0.345634		64.3448	0.282519	0.251272		1002.69
	TR	LH5-1	#60	52.7398	0.188137	0.412328	22.7998	0.86691	21.7224	1.27094	bdl	bdl	100.023		1.97244	-	0.0181746	0.0181746	0.00529259	-	0.027861	0.685241	0.0274616	1.2111	0.0509287		0.0254313	0.604767	0.356089		62.9442	0.30015	0.251272		1000.04	1.06089
	TR	LH5-1	#69	52.372	0.212069	0.415066	23.1054	0.910264	21.415	1.3672	bdl	bdl	99.835		1.9667	-	0.0183701	0.0183701	0.00599027	-	0.0365406	0.68908	0.028953	1.19885	0.0550106		0.0273898	0.596908	0.361286		62.2988	0.308541	0.251272		996.771	-0.749322
	TR	LH5-1	#70	52.8099	0.131629	0.27246	23.1825	0.894085	21.7485	1.31868	bdl	bdl	100.409		1.96971	-	0.0119769	0.0119769	0.00369289	-	0.0421189	0.680989	0.0282456	1.20927	0.0526986		0.0261749	0.600635	0.359161		62.5831	0.304823	0.251272		996.951	0.665369
	TR	LH5-1	#98	52.3804	0.165911	0.288378	23.6955	0.912252	21.0727	1.42496	bdl	bdl	99.975		1.96847	-	0.0127725	0.0127725	0.00468992	-	0.0433069	0.701392	0.0290376	1.18056	0.0573766		0.0285218	0.586855	0.370188		61.3234	0.321559	0.251272		991.75	1.85847
	TR	LH5-1	#99	52.6435	0.199484	0.420596	22.8606	0.813011	21.937	1.47796	bdl	bdl	100.412		1.9599	-	0.0184548	0.0184548	0.00558631	-	0.0527707	0.658985	0.0256372	1.21752	0.0589556		0.0292748	0.604567	0.353428		63.1113	0.298006	0.251272		1000.07	1.60525
	TR	LH5-1	#100	53.0535	0.152551	0.183402	23.3673	1.00188	21.1066	1.38228	bdl	bdl	100.304		1.98735	-	0.00809696	0.00809696	0.00429839	-	0.0104961	0.721529	0.0317881	1.17866	0.0554792		0.027768	0.589933	0.366388		61.6915	0.316597	0.251272		995.943	1.61431
	TR	LH5-1	#101	53.0776	0.131995	0.191253	23.0449	0.855387	21.8072	1.49515	bdl	bdl	100.616		1.97479	-	0.00838637	0.00838637	0.003694	-	0.0346437	0.682391	0.0269562	1.20953	0.0596031		0.0296072	0.600823	0.356179		62.7855	0.302198	0.251272		999.062
	TR	LH5-1	#102	53.1906	0.269366	0.582222	22.6903	0.822896	21.9166	1.6036	bdl	bdl	101.133		1.96674	-	0.0253721	0.0253721	0.00749176	-	0.0273699	0.674258	0.0257717	1.20807	0.0635301		0.0317809	0.604337	0.350989		63.2635	0.296063	0.251272		1003.99	0.819845
	TR	LH5-1	#110	53.2533	0.132031	0.220913	23.3465	0.865131	21.5125	1.37282	bdl	bdl	100.747		1.98197	-	0.00969007	0.00969007	0.00369621	-	0.0213781	0.705277	0.027272	1.19358	0.0547439		0.0273412	0.596118	0.36292		62.1617	0.310347	0.251272		996.895	1.78141
	TR	LH5-1	#111	53.0616	0.213787	0.427524	22.892	0.88283	21.5669	1.37828	bdl	bdl	100.436		1.97866	-	0.0187892	0.0187892	0.00599655	-	0.0126927	0.701197	0.027884	1.19891	0.0550683		0.0275928	0.600731	0.357704		62.682	0.303538	0.251272		1000.62	0.175144
	TR	LH5-1	#112	52.6866	0.217384	0.418494	23.3059	0.898794	21.7069	1.3785	bdl	bdl	100.643		1.9606	-	0.0183541	0.0183541	0.00608479	-	0.0504738	0.674813	0.0283292	1.20419	0.0549626		0.027307	0.598275	0.360343		62.4139	0.307032	0.251272		996.417	1.65748
	TR	LH5-1	#113	52.3339	0.273233	0.511829	23.7236	0.882357	21.2008	1.53454	bdl	bdl	100.503		1.95557	-	0.0225408	0.0225408	0.00767984	-	0.0534597	0.687894	0.0279267	1.181	0.0614387		0.0305404	0.58706	0.368518		61.4389	0.319996	0.251272		992.725	1.90856
	TR	LH6-1	#188	52.255	0.260689	0.51937	23.8848	1.00112	20.5267	1.51603	bdl	bdl	99.967		1.96978	-	0.023074	0.023074	0.00739168	-	0.0224747	0.730478	0.031964	1.1535	0.0612311		0.0306209	0.576852	0.376542		60.5089	0.239215	0.247071		970.739
	TR	LH6-1	#189	52.3507	0.233216	0.51419	22.8612	0.825305	21.4398	1.45368	bdl	bdl	99.689		1.9664	-	0.022763	0.022763	0.00658929	-	0.0320479	0.686085	0.0262573	1.20055	0.0585049		0.0292022	0.599243	0.358449		62.5753	0.219212	0.247071
	TR	LH6-1	#190	52.2968	0.261375	0.536517	22.7658	0.887693	21.4183	1.46051	bdl	bdl	99.653		1.96565	-	0.0237667	0.0237667	0.00738965	-	0.0297583	0.68584	0.0282604	1.20012	0.0588177		0.0293678	0.599222	0.3573		62.6497	0.218517	0.247071
	TR	LH6-1	#192	51.9227	0.266871	0.504249	23.5993	0.985415	20.7635	1.48156	bdl	bdl	99.553		1.96241	-	0.0224613	0.0224613	0.00758691	-	0.0373356	0.708578	0.0315456	1.16988	0.0599965		0.0298886	0.582803	0.371593		61.0689	0.233661	0.247071		971.894
	TR	LH6-1	#193	52.4948	0.236513	0.432569	22.6319	0.899716	21.4183	1.37788	bdl	bdl	99.504		1.97547	-	0.0191851	0.0191851	0.00669481	-	0.0168869	0.695361	0.0286778	1.20157	0.0555569		0.0278056	0.60137	0.356471		62.7876	0.217231	0.247071
	TR	LH6-1	#194	52.3562	0.27217	0.444415	22.8269	0.878923	21.3822	1.53354	0.0452528	bdl	99.764		1.96566	-	0.0196646	0.0196646	0.00768616	-	0.0363346	0.680375	0.0279497	1.19675	0.061689		0.0307968	0.597449	0.357801		62.5474	0.219473	0.247071
	TR	LH6-1	#198	52.5034	0.232598	0.481337	22.7974	0.88884	21.1233	1.39292	bdl	bdl	99.432		1.9801	0.019895	0.00149963	0.0213947	0.00659835	-	0.00539865	0.713622	0.0283929	1.1876	0.0562859		0.0282659	0.596395	0.36108		62.292	0.221876	0.247071
	TR	LH6-1	#199	52.1737	0.221998	0.474531	23.9863	0.951319	20.678	1.46202	bdl	bdl	100.001		1.96526	-	0.0210663	0.0210663	0.00628994	-	0.0371406	0.71845	0.0303514	1.16114	0.0590056		0.0294132	0.578809	0.376649		60.583	0.238474	0.247071		969.502	0.99971
	TR	LH6-1	#200	52.793	0.277835	0.606985	24.0093	0.911022	20.8573	1.48537	bdl	bdl	100.967		1.96814	-	0.0266693	0.0266693	0.00779104	-	0.0226739	0.725865	0.0287669	1.15917	0.0593318		0.0297282	0.580802	0.375056		60.7661	0.236651	0.247071		971.819	1.0705
	TR	LH6-1	#201	52.2042	0.27985	0.651124	23.6256	0.868261	21.1662	1.47223	bdl	bdl	100.284		1.95451	-	0.028731	0.028731	0.00788109	-	0.0476856	0.692039	0.0275339	1.18136	0.0590583		0.0294161	0.588422	0.368447		61.4983	0.22947	0.247071
	TR	LH6-1	#202	52.0597	0.319282	0.497119	23.5611	0.94722	20.4969	1.50991	0.0530861	bdl	99.465		1.97068	-	0.0221784	0.0221784	0.00909114	-	0.0221784	0.723694	0.0303704	1.15667	0.0612403		0.0307099	0.580031	0.374029		60.7998	0.236317	0.247071		972.692	2.47171
	TR	LH6-1	#211	52.1983	0.263378	0.515489	23.2092	0.8545	20.7312	1.55562	bdl	bdl	99.341		1.97496	-	0.0229868	0.0229868	0.00749569	-	0.0116933	0.722684	0.0273843	1.16933	0.0630637		0.0316243	0.586378	0.368265		61.4275	0.230156	0.247071		975.744
	TR	LH6-1	#212	52.3389	0.214856	0.424868	23.5323	0.950902	20.7703	1.48363	bdl	bdl	99.754		1.97294	-	0.0188755	0.0188755	0.00609208	-	0.0258664	0.715969	0.0303605	1.16718	0.0599221		0.0299715	0.583795	0.371048		61.1442	0.232921	0.247071		973.274	1.99601
	TR	LH6-1	#213	52.1316	0.217613	0.367376	23.6549	1.05043	20.6355	1.45379	bdl	bdl	99.533		1.97179	-	0.0163767	0.0163767	0.00619118	-	0.028759	0.719475	0.033652	1.16354	0.058916		0.0293942	0.58051	0.373306		60.8656	0.235665	0.247071		971.463	0.855403
	TR	LH6-1	#214	51.8397	0.250941	0.504938	24.602	0.913071	19.7206	1.38243	bdl	bdl	99.269		1.97636	-	0.0226881	0.0226881	0.00719622	-	0.0117938	0.772594	0.0294845	1.12081	0.0564704		0.0283606	0.562895	0.393936		58.8329	0.256471	0.247071		963.361	1.778
	TR	LH6-1	#218	52.5711	0.229299	0.416519	22.7151	0.823927	21.2242	1.48592	bdl	bdl	99.489		1.9808	-	0.0184963	0.0184963	0.0064987	-	0.00689862	0.708858	0.0262947	1.19216	0.059988		0.0300812	0.597814	0.358919		62.4887	0.220024	0.247071
	TR	LH6-1	#219	52.4059	0.229145	0.508487	22.9345	0.798329	21.0357	1.56907	0.045133	bdl	99.533		1.97447	-	0.0225791	0.0225791	0.00649399	-	0.0185828	0.704049	0.0254764	1.18151	0.0633414		0.0317826	0.592841	0.362593		62.0532	0.224141	0.247071
	TR	LH6-1	#220	51.7419	0.269263	0.573579	22.9983	0.835377	20.8292	1.59326	bdl	bdl	98.888		1.9641	-	0.0256609	0.0256609	0.00768828	-	0.0328499	0.697237	0.026859	1.1787	0.0648012		0.0323933	0.589219	0.364961		61.7551	0.226992	0.247071
	TR	LH6-1	#230	52.6483	0.263265	0.524503	22.62	0.868837	21.8263	1.41113	bdl	bdl	100.207		1.96387	-	0.0230585	0.0230585	0.0073867	-	0.036135	0.669495	0.0274506	1.21372	0.0563985		0.0281543	0.60589	0.352252		63.2396	0.213059	0.247071
	TR	LH6-1	#231	52.5266	0.223273	0.563207	22.5812	0.799416	21.6676	1.43309	bdl	bdl	99.804		1.96774	-	0.0248664	0.0248664	0.00629151	-	0.0277625	0.679682	0.0253658	1.21007	0.0575223		0.0287554	0.604912	0.353652		63.1098	0.214251	0.247071
	TR	LH6-1	#232	52.3102	0.294691	0.727391	22.7535	0.816644	21.5156	1.69743	bdl	bdl	100.152		1.95425	-	0.0320271	0.0320271	0.00828116	-	0.0453967	0.665486	0.0258412	1.19827	0.0679454		0.0339228	0.598257	0.354919		62.7683	0.217411	0.247071
	TR	LH6-1	#233	52.4997	0.259516	0.689744	22.808	0.861881	21.6577	1.43754	bdl	bdl	100.221		1.95982	-	0.0303461	0.0303461	0.00728707	-	0.0359362	0.6761	0.0272516	1.20526	0.0574979		0.0287196	0.602014	0.355654		62.8662	0.216501	0.247071
	TR	LH6-1	#242	51.8425	0.213532	0.308309	24.8481	1.04452	20.1124	1.44254	bdl	bdl	99.816		1.96448	-	0.013769	0.013769	0.00608631	-	0.0450985	0.74233	0.0335246	1.13614	0.0585682		0.0290565	0.563657	0.390654		59.0681	0.253991	0.247071		961.364
	TR	LH6-1	#243	52.5883	0.236492	0.475332	22.6553	0.815001	21.1938	1.53139	bdl	bdl	99.524		1.98055	0.0194485	0.00164988	0.0210984	0.0066995	-	0.00479964	0.708747	0.0259981	1.18991	0.0617954		0.0310334	0.59757	0.358341		62.5169	0.219759	0.247071
	TR	LH6-1	#244	52.0527	0.270496	0.695033	22.8508	0.898475	20.9139	1.52657	bdl	bdl	99.235		1.96872	-	0.0309814	0.0309814	0.00769538	-	0.0161903	0.706576	0.0287827	1.17919	0.0618629		0.0310462	0.591785	0.362724		62.0026	0.224622	0.247071
	TR	LH6-1	#245	51.6788	0.237368	0.492356	22.4205	0.778092	21.0969	1.4532	0.184177	bdl	98.432		1.96476	-	0.0220614	0.0220614	0.00678812	-	0.0484153	0.664437	0.0250562	1.19571	0.0591964		0.029705	0.60001	0.357712		62.6534	0.218481	0.247071
	TR	LH6-1	#246	52.0473	0.207378	0.309574	23.1607	0.902097	21.2129	1.44846	0.0695448	bdl	99.38		1.96379	-	0.0137663	0.0137663	0.00588558	-	0.0518729	0.678937	0.0288294	1.19318	0.0585565		0.0291127	0.593215	0.363339		62.0196	0.22446	0.247071
	TA	LH4	#131	51.6789	0.155937	1.44082	22.6354	0.774238	21.5067	1.44305	0.0439976	0.212418	99.902		1.93299	-	0.0635158	0.0635158	0.00438728	0.00628178	0.05863	0.649417	0.0245289	1.19922	0.0578323		0.0290669	0.602736	0.355868		62.8801	0.449871	0.277166
	TA	LH4	#138	52.7073	0.127732	0.83786	22.3232	0.756225	21.5959	1.33511	bdl	0.0607607	99.751		1.97431	0.0256923	0.0112966	0.0369889	0.00359892	0.00179946	0.00589823	0.693392	0.0239928	1.20594	0.0535839		0.0270243	0.608198	0.352677		63.3	0.441833	0.277166
	TA	LH13	#3	53.8285	0.276091	0.809167	18.5887	0.500051	24.716	1.44603	bdl	bdl	100.178		1.96872	0.0312812	0.00359784	0.0348791	0.00759544	-	0.0129922	0.555567	0.0154907	1.34759	0.056666		0.0284996	0.677758	0.285951		70.3314	0.441447	0.262484
	TA	LH13	#4	53.4488	0.276194	0.782932	17.3088	0.430033	24.7951	1.34469	bdl	bdl	98.407		1.98254	0.0174635	0.016763	0.0342265	0.00770597	-	0	0.536916	0.0135105	1.37106	0.0534414		0.0270599	0.694233	0.271866		71.8626	0.409742	0.262484
	TA	LH13	#5	54.0685	0.449718	1.34571	16.1632	0.409199	26.1156	2.04698	bdl	bdl	100.647		1.94766	0.0523372	0.00479425	0.0571314	0.0121854	-	0.0237715	0.463144	0.012485	1.40242	0.0790052		0.039885	0.707997	0.245815		74.2312	0.363277	0.262484
	TA	LH13	#6	52.7145	0.361709	1.08731	17.7406	0.430435	25.4798	1.57437	bdl	bdl	99.475		1.93113	-	0.0469451	0.0469451	0.00996711	-	0.0708661	0.47264	0.0133559	1.39151	0.0617961		0.0307418	0.692235	0.270379		71.9152	0.408677	0.262484
	TA	LH13	#7	52.2809	0.48719	0.891957	21.2255	0.549504	21.8799	2.33923	0.0593238	bdl	99.747		1.95162	-	0.0392421	0.0392421	0.0136798	-	0.0344492	0.628173	0.0173744	1.2176	0.093562		0.0469886	0.611504	0.332782		64.762	0.569405	0.262484
	TA	LH13	#10	51.1756	0.389925	0.899389	25.4453	0.689519	15.1994	4.71841	0.244161	bdl	98.945		1.99514	0.00486472	0.0364603	0.041325	0.0114346	-	0	0.82961	0.0227689	0.883372	0.197096		0.101972	0.457032	0.429216		51.5732	0.982633	0.262484
	TA	LH13	#11	54.5708	0.353009	1.47037	14.6122	0.270595	27.4601	1.70346	bdl	0.0777748	100.556		1.95118	0.0488195	0.0131418	0.0619613	0.00949407	0.00219863	0.0155903	0.421337	0.00819488	1.46369	0.0652592		0.0330583	0.741457	0.221333		77.0141	0.312336	0.262484		1091.16	0.45931
	TA	LH13	#12	53.8087	0.368171	1.56494	15.6203	0.421778	26.4627	1.91525	bdl	0.0630488	100.268		1.94019	0.0598133	0.0066903	0.0665036	0.00998552	0.00179739	0.0325528	0.438464	0.0128813	1.42244	0.0739927		0.0373639	0.718284	0.237848		75.1269	0.346469	0.262484		1080.83	0.599143
	TA	LH13	#13	54.1702	0.332281	1.36196	15.83	0.380334	26.7714	1.54737	bdl	bdl	100.471		1.94782	0.0521756	0.0055421	0.0577178	0.00898719	-	0.0296577	0.446364	0.0115835	1.43506	0.059615		0.0300741	0.723943	0.240139		75.0944	0.347072	0.262484		1078.16	1.39468
	TA	LH13	#14	53.7369	0.434071	1.00823	22.6573	0.571904	19.166	2.48281	0.263644	bdl	100.513		2.01961	-	0.044659	0.044659	0.0122712	-	0	0.71213	0.0182056	1.07383	0.0999799		0.0525065	0.563943	0.37399		60.13	0.693882	0.262484
	TA	LH13	#21	52.3224	0.419226	0.602573	22.6559	0.556884	20.2179	2.78234	0.0669699	bdl	99.637		1.97401	0.0259935	0.0007998	0.0267933	0.011897	-	0.00609848	0.708723	0.0177956	1.13712	0.112472		0.0567408	0.573662	0.360619		61.4052	0.65774	0.262484
	TA	LH13	#29	52.9436	0.382963	1.0722	19.7866	0.442765	24.0063	1.55731	bdl	bdl	100.249		1.94373	-	0.0463933	0.0463933	0.0105757	-	0.0470917	0.560411	0.0137683	1.31388	0.0612591		0.0306847	0.658121	0.304298		68.3854	0.483787	0.262484
	TA	LH13	#30	52.2274	0.424375	1.17898	21.0353	0.459214	22.7064	1.52718	bdl	bdl	99.646		1.9435	-	0.0517069	0.0517069	0.0118786	-	0.0396287	0.614993	0.0144739	1.25963	0.0608904		0.0306041	0.633103	0.329019		65.8064	0.54376	0.262484
	TA	LH13	#31	52.9825	0.444814	2.11522	17.4398	0.339979	25.0452	1.64327	bdl	0.041625	100.068		1.92939	0.0706082	0.0201738	0.090782	0.0121842	0.00119844	0.0259662	0.505143	0.0104864	1.35963	0.0641166		0.0326236	0.691803	0.270237		71.9132	0.408718	0.262484
	TA	LH13	#40	52.7664	0.257287	0.691039	19.9274	0.488709	23.6848	1.39231	bdl	bdl	99.254		1.95947	-	0.030244	0.030244	0.0071867	-	0.0373309	0.581524	0.0153716	1.31117	0.0553975		0.0276877	0.655326	0.309304		67.9389	0.493844	0.262484
	TA	LH13	#41	53.3865	0.388339	1.35147	17.1185	0.435967	25.9589	1.70006	bdl	bdl	100.402		1.93223	-	0.0576487	0.0576487	0.0105722	-	0.0580476	0.460092	0.0133649	1.40062	0.0659269		0.0329956	0.700993	0.259322		72.9993	0.387068	0.262484
	TA	LH13	#42	54.0171	0.23065	0.635559	15.9347	0.383654	26.8023	1.62952	0.0553937	bdl	99.723		1.957	-	0.0271376	0.0271376	0.00628554	-	0.0498853	0.432904	0.0117729	1.44757	0.0632545		0.0315423	0.721841	0.240746		74.9927	0.348963	0.262484		1074.89	2.0816
	TA	LH13	#43	53.6499	0.363715	1.03067	15.4476	0.368222	26.6746	1.26393	bdl	bdl	98.824		1.95914	0.0408612	0.00349668	0.0443579	0.00999051	-	0.0191818	0.45257	0.0113892	1.45212	0.049453		0.0249169	0.731652	0.237693		75.482	0.339916	0.262484		1078.76	1.04566
	TA	LH13	#51	52.2921	0.341905	0.382434	22.7568	0.66048	20.0829	3.30595	0.0642709	bdl	99.901		1.96949	-	0.0169758	0.0169758	0.0096862	-	0.0290586	0.68772	0.02107	1.12759	0.13341		0.0667433	0.56412	0.358595		61.1408	0.66511	0.262484
	TA	LH13	#67	53.7555	0.301199	1.23545	15.5906	0.381653	27.061	1.475	bdl	bdl	99.853		1.9408	-	0.0525699	0.0525699	0.00817976	-	0.0513729	0.419362	0.0116711	1.4565	0.0570588		0.0285871	0.729722	0.235844		75.5775	0.338165	0.262484		1078.42	1.16809
	TA	LH13	#68	53.5312	0.324281	0.981335	17.0349	0.45624	25.7071	1.80589	bdl	bdl	99.874		1.94911	-	0.0421116	0.0421116	0.00888135	-	0.0424109	0.4763	0.0140705	1.39537	0.0704521		0.0352506	0.698173	0.259537		72.9034	0.388953	0.262484
	TA	LH13	#70	53.3712	0.419286	1.2612	16.8624	0.443585	25.8617	1.56646	bdl	bdl	99.805		1.94241	-	0.0540972	0.0540972	0.0114782	-	0.0390259	0.474199	0.013674	1.40313	0.0610839		0.0306782	0.704697	0.257757		73.2219	0.38271	0.262484
	TA	LH13	#71	53.287	0.277544	0.75455	19.4715	0.528163	24.0723	1.43729	bdl	bdl	99.867		1.9629	-	0.0327582	0.0327582	0.0076902	-	0.0277646	0.572071	0.016479	1.32191	0.0567277		0.0284355	0.662628	0.300676		68.7904	0.474777	0.262484
	TA	LH13	#72	54.6087	0.218094	0.868185	14.6557	0.367665	27.4344	1.8399	0.0516269	0.0668188	100.111		1.96106	-	0.0367449	0.0367449	0.00589116	0.00189715	0.0310534	0.409086	0.0111832	1.4687	0.0707938		0.0355602	0.737737	0.221085		76.9448	0.313559	0.262484		1089.11	1.8335
	TA	LH13	#76	53.3867	0.371441	1.60311	15.1035	0.329863	27.3537	1.56974	bdl	bdl	99.786		1.92341	-	0.0680703	0.0680703	0.010066	-	0.066974	0.38809	0.010066	1.46914	0.0605955		0.0303757	0.736461	0.228118		76.3534	0.324093	0.262484		1083.23	1.49002
	TA	LH13	#77	53.5646	0.334084	1.31447	14.4598	0.342332	27.7582	1.48197	bdl	bdl	99.311		1.93433	-	0.0559448	0.0559448	0.00907482	-	0.0580389	0.378649	0.0104709	1.49435	0.0573409		0.0286869	0.747605	0.218469		77.3887	0.305759	0.262484		1088.58	0.240659
	TA	LH13	#78	50.8993	0.410338	0.547984	20.2557	0.554264	21.7744	1.9947	bdl	bdl	96.487		1.95902	-	0.0248571	0.0248571	0.0118795	-	0.0343408	0.617635	0.0180688	1.24934	0.0822581		0.0410952	0.624158	0.325719		65.7129	0.546022	0.262484
	TA	LH13	#79	53.6177	0.349854	1.70167	15.0911	0.356478	27.0957	1.63653	0.0457189	bdl	99.938		1.93101	0.0689862	0.0032423	0.0722285	0.00947749	-	0.0491832	0.405337	0.0108742	1.45474	0.06315		0.031841	0.733501	0.229175		76.1968	0.32691	0.262484		1084.55	1.97691
	TA	LH13	#80	53.5519	0.32695	1.58963	14.2047	0.319714	27.5776	1.67118	bdl	bdl	99.305		1.93355	0.0664472	0.00119725	0.0676444	0.00887958	-	0.0484885	0.380425	0.00977751	1.48439	0.0646513		0.0325252	0.746775	0.215781		77.5853	0.302332	0.262484		1092.3	0.805949
	TA	LH13	#81	53.1543	0.327005	1.11308	16.6865	0.419468	26.1318	1.43097	0.0493358	bdl	99.355		1.93966	-	0.0478707	0.0478707	0.00897577	-	0.0580433	0.451182	0.012965	1.42156	0.0559489		0.0279787	0.710887	0.254651		73.6291	0.374805	0.262484
	TA	LH13	#82	52.0938	0.412952	1.12405	21.7015	0.529717	20.8363	2.23251	0.249211	bdl	99.252		1.96088	0.0391236	0.0107427	0.0498663	0.0116921	-	0.0230844	0.660054	0.0168886	1.16921	0.0900392		0.0459553	0.596756	0.348669		63.1241	0.611332	0.262484
	TA	LH13	#85	52.6218	0.435807	1.72448	16.4208	0.361222	25.9787	1.61134	0.0605848	bdl	99.256		1.92054	-	0.0741775	0.0741775	0.0119641	-	0.0649053	0.436291	0.0111665	1.41346	0.063011		0.0316824	0.710698	0.252005		73.8262	0.37101	0.262484
	TA	LH13	#86	53.2742	0.321169	1.18794	15.133	0.385693	27.1585	1.57573	bdl	0.0486109	99.109		1.93475	-	0.0508462	0.0508462	0.00877346	0.00139578	0.061813	0.397797	0.0118641	1.47035	0.0613145		0.0306092	0.734023	0.229445		76.1884	0.327061	0.262484		1081.66	0.0701119
	TA	LH13	#87	53.4635	0.235461	0.612669	17.9691	0.463247	25.4776	1.33258	bdl	bdl	99.589		1.9576	-	0.0264392	0.0264392	0.00648508	-	0.0464931	0.503741	0.014367	1.3907	0.0522798		0.0260411	0.692724	0.274078		71.6543	0.413976	0.262484
	TA	LH13	#88	53.3932	0.347241	1.62364	15.1427	0.33434	26.6739	1.67819	bdl	0.0556393	99.273		1.93861	0.0613926	0.00808585	0.0694784	0.0094834	0.0015972	0.0344397	0.425356	0.010282	1.44377	0.0652857		0.032987	0.729497	0.232321		75.8485	0.333217	0.262484		1083.62	1.14675
	TA	LH13	#89	53.3225	0.324795	1.12031	15.9788	0.379183	26.733	1.52182	bdl	bdl	99.447		1.9364	-	0.047949	0.047949	0.00887205	-	0.0631012	0.42217	0.0116633	1.44724	0.0592135		0.0295567	0.722396	0.242225		74.8921	0.350837	0.262484
	TA	LH13	#90	53.2309	0.362001	1.11129	16.2669	0.385775	25.7689	1.65696	bdl	0.0516601	98.903		1.9529	0.0471017	0.000949027	0.0480507	0.00998976	0.00149846	0.0266727	0.472416	0.0119877	1.40936	0.0651332		0.0328034	0.709801	0.251358		73.8515	0.370526	0.262484
	TA	LH13	#91	52.9114	0.398933	1.28693	16.2773	0.40903	26.1329	1.55817	0.0590934	bdl	99.044		1.93394	-	0.0554378	0.0554378	0.0109679	-	0.0586285	0.438916	0.012663	1.42393	0.0610215		0.0305847	0.713693	0.249375		74.1092	0.365597	0.262484
	TA	LH13	#96	54.1825	0.248666	0.553133	16.9226	0.467642	26.1253	1.50696	bdl	bdl	100.045		1.96675	-	0.0236633	0.0236633	0.00678948	-	0.0314513	0.482253	0.0143777	1.41371	0.0586092		0.0292987	0.706713	0.256801		73.3506	0.380202	0.262484
	TA	LH13	#98	53.7365	0.32357	0.768032	17.2167	0.477841	25.5846	1.53649	bdl	bdl	99.672		1.96245	-	0.033057	0.033057	0.00888845	-	0.0262659	0.499551	0.0147808	1.39289	0.0601218		0.0301573	0.698677	0.263751		72.5984	0.394983	0.262484
	TA	LH13	#99	50.5711	0.104638	0.0603197	31.9569	0.518582	14.7474	1.51657	0.0615472	bdl	99.557		1.99071	-	0.00279846	0.00279846	0.0030983	-	0.0142921	1.03773	0.0172905	0.865424	0.0639648		0.0320032	0.432993	0.526353		45.1382	1.27191	0.262484
	TA	LH13	#100	53.3633	0.345056	1.21934	17.2135	0.454809	25.4157	1.56564	bdl	bdl	99.605		1.95062	0.0493846	0.00314583	0.0525304	0.00948743	-	0.0266647	0.499538	0.0140813	1.38496	0.0613188		0.0308667	0.697165	0.26488		72.4701	0.397535	0.262484
	TA	LH13	#101	50.0162	0.076675	bdl	32.8632	0.532895	13.8889	1.47677	bdl	bdl	98.892		1.9938	-	0.00039984	-	0.00229908	-	0.00789684	1.08766	0.0179928	0.82537	0.0630748		0.0315059	0.412273	0.547234		42.9711	1.38883	0.262484
	TA	LH13	#102	53.5265	0.272646	0.976773	18.3366	0.474568	25.1109	1.37047	bdl	bdl	100.111		1.95447	-	0.0420348	0.0420348	0.00748839	-	0.0345465	0.525386	0.0146773	1.36688	0.0536169		0.0268742	0.685117	0.280653		70.9433	0.428613	0.262484
	TA	LH13	#103	51.385	0.157428	0.0851849	28.5227	0.689913	16.9141	1.52805	bdl	bdl	99.324		1.9974	0.00260169	0.00130085	0.00390254	0.00460299	-	0	0.927203	0.0227148	0.980137	0.0636414		0.0319213	0.491618	0.465067		51.3916	0.989804	0.262484
	TA	LH13	#108	53.5823	0.31047	0.580624	20.8755	0.692497	23.2394	1.40406	bdl	bdl	100.689		1.97172	-	0.0251811	0.0251811	0.00859355	-	0.0144891	0.627929	0.0215838	1.27484	0.0553585		0.0277597	0.639274	0.322143		66.4965	0.527257	0.262484
	TA	LH13	#109	52.8318	0.473476	0.590838	23.1747	0.630715	20.1123	2.07127	0.056203	bdl	99.985		1.99158	0.00841599	0.0178339	0.0262499	0.0134255	-	0	0.730588	0.0201383	1.13025	0.083659		0.0425825	0.575297	0.37187		60.7425	0.676332	0.262484
	TA	LH13	#112	51.4649	0.421747	0.454499	24.9181	0.718376	17.5386	3.64518	0.0871742	bdl	99.298		1.9796	0.0204041	0.00020004	0.0206041	0.0122024	-	0.00210042	0.79946	0.0234047	1.0057	0.15023		0.0758394	0.5077	0.404645		55.6517	0.833928	0.262484
	TA	LH13	#119	52.541	0.462287	0.780865	23.1598	0.645134	17.2609	3.81639	0.148332	bdl	99.116		2.02407	-	0.0354535	0.0354535	0.0133958	-	0	0.746135	0.0210505	0.991288	0.157526		0.0822163	0.517374	0.389423		57.059	0.787551	0.262484
	TA	LH13	#120	51.721	0.481038	0.591611	20.8911	0.545683	21.4388	2.86678	bdl	bdl	98.622		1.95551	-	0.0263624	0.0263624	0.0136805	-	0.0371471	0.623412	0.0174751	1.20838	0.116135		0.0579934	0.603421	0.329859		64.6595	0.571965	0.262484
	TA	LH13	#170	50.3743	0.590533	1.0819	21.4179	0.570704	21.0854	2.70204	0.0417772	bdl	97.908		1.92079	-	0.0486201	0.0486201	0.0169373	-	0.0788084	0.604165	0.0184318	1.19857	0.110392		0.0549113	0.596194	0.339726		63.705	0.596215	0.262484
	TA	LH13	#172	50.0022	1.33205	0.990741	26.4976	0.626625	17.2839	2.51787	0.144217	bdl	99.521		1.93048	-	0.0450808	0.0450808	0.0386836	-	0.0273884	0.828148	0.0204913	0.994777	0.104156		0.0527381	0.503695	0.433192		53.7666	0.899858	0.262484
	TA	LH13	#175	54.298	0.448864	0.596434	18.502	0.457432	25.548	1.35345	bdl	0.0945091	101.341		1.95911	-	0.0253626	0.0253626	0.012182	0.00269602	0.0312539	0.527023	0.0139794	1.37417	0.0523228		0.0261777	0.687516	0.279313		71.1137	0.425078	0.262484
	TA	LH13	#176	53.5422	0.31977	0.732851	17.3647	0.509865	25.7237	1.44387	bdl	bdl	99.688		1.9547	-	0.0315322	0.0315322	0.00878112	-	0.0427082	0.487452	0.0157661	1.39999	0.0564786		0.0282055	0.699158	0.264763		72.5359	0.396226	0.262484
	TA	LH13	#177	52.5887	0.51994	1.10843	19.7812	0.426467	24.2888	1.37387	bdl	0.0687029	100.19		1.9306	-	0.0479585	0.0479585	0.0143576	0.00199412	0.0613191	0.545989	0.0132609	1.32928	0.0540406		0.0269679	0.66335	0.303065		68.6437	0.478029	0.262484
	TA	LH13	#178	53.6609	0.476206	1.06608	18.1575	0.448925	25.3106	1.6587	0.0511607	bdl	100.854		1.94313	-	0.0454976	0.0454976	0.0129708	-	0.0453979	0.504465	0.013769	1.36633	0.0643552		0.0322694	0.685111	0.275715		71.3076	0.421077	0.262484
	TA	LH13	#179	52.2975	0.402465	0.843329	21.8093	0.506073	22.4079	1.53523	bdl	bdl	99.883		1.94781	-	0.0370186	0.0370186	0.0112752	-	0.0461984	0.633107	0.0159649	1.24416	0.0612652		0.0306219	0.621864	0.339534		64.6869	0.57128	0.262484
	TA	LH13	#185	53.8025	0.228013	0.556687	19.4505	0.623542	24.2187	1.30853	bdl	bdl	100.225		1.97516	-	0.0240862	0.0240862	0.00629638	-	0.0119931	0.585164	0.0193889	1.32544	0.0514704		0.0258197	0.664895	0.299559		68.9435	0.471401	0.262484
	TA	LH13	#250	52.6949	0.330957	1.06072	17.7247	0.517538	25.0613	1.49507	0.0572203	bdl	98.953		1.94216	-	0.0460756	0.0460756	0.00917523	-	0.0553506	0.490974	0.0161564	1.37698	0.0590406		0.0295424	0.689006	0.273367		71.5977	0.41513	0.262484
	TA	LH13	#251	54.0211	0.221437	0.530553	17.1123	0.589949	25.5917	1.394	bdl	bdl	99.468		1.97731	0.0226875	0.00019989	0.0228874	0.00609665	-	0.0107941	0.513018	0.0182899	1.39643	0.0546699		0.0274282	0.700597	0.262799		72.7248	0.392479	0.262484
	TA	LH13	#252	53.4689	0.253832	0.601722	17.5993	0.528125	25.7396	1.34922	bdl	bdl	99.557		1.95566	-	0.0259384	0.0259384	0.00698341	-	0.0491832	0.489138	0.0163611	1.40347	0.0528744		0.0262923	0.697887	0.267685		72.2802	0.401329	0.262484
	TA	LH13	#253	52.8555	0.316428	0.88354	16.9827	0.526889	25.5401	1.39849	bdl	bdl	98.562		1.95025	-	0.0384222	0.0384222	0.00878222	-	0.045408	0.478631	0.0164667	1.40486	0.055288		0.0276351	0.7022	0.261934		72.8353	0.390295	0.262484
	TA	LH13	#254	53.4549	0.354213	1.16763	15.2203	0.39888	27.1367	1.37409	bdl	bdl	99.146		1.94173	-	0.0499875	0.0499875	0.00967822	-	0.0465952	0.415765	0.0122724	1.46949	0.0534797		0.0267719	0.735628	0.231457		76.0694	0.32921	0.262484		1080.76	-2.53408
	TA	LH13	#258	53.9075	0.295361	0.812209	15.2345	0.417736	26.8733	1.41051	0.0466837	bdl	99.012		1.963	-	0.0348573	0.0348573	0.00809009	-	0.0261679	0.437764	0.0128842	1.45881	0.0550326		0.0276454	0.732828	0.233054		75.8743	0.332748	0.262484		1080.94	1.76268
	TA	LH13	#259	52.4605	0.367412	1.60696	15.5675	0.390262	26.0847	1.54761	0.0517056	bdl	98.105		1.93147	0.0685321	0.00119707	0.0697292	0.0101751	-	0.0499776	0.429348	0.0121702	1.43169	0.0610504		0.0307677	0.721532	0.241567		74.9208	0.350302	0.262484
	TA	LH13	#260	52.3418	0.404421	1.61089	16.632	0.484212	25.8862	1.43732	bdl	bdl	98.81		1.92067	-	0.0696666	0.0696666	0.0111626	-	0.066577	0.443813	0.0150496	1.41606	0.0565107		0.0282835	0.708734	0.25545		73.5092	0.377123	0.262484
	TA	LH13	#261	52.1309	0.396979	1.91633	15.6392	0.342927	26.3107	1.46693	0.0462031	bdl	98.281		1.91389	-	0.0829181	0.0829181	0.0109627	-	0.0702611	0.409906	0.0106637	1.44	0.0577038		0.0290182	0.724152	0.241467		74.9965	0.348891	0.262484		1075.84	2.00445
	TA	LH13	#262	53.6176	0.310683	1.22237	13.8833	0.331088	27.7504	1.42156	bdl	0.0730253	98.635		1.9466	-	0.0523032	0.0523032	0.0084843	0.00209612	0.0370315	0.384489	0.0101812	1.50192	0.0552977		0.0278029	0.755144	0.211934		78.0878	0.293652	0.262484		1093.82	0.558959
	TA	LH13	#263	53.2903	0.287314	1.11183	15.9044	0.432791	26.4175	1.63916	0.0409176	bdl	99.145		1.9428	-	0.0477722	0.0477722	0.00787892	-	0.0531578	0.431745	0.0133643	1.43576	0.0640287		0.0320455	0.718578	0.242687		74.7564	0.353374	0.262484
	TA	LH13	#264	53.7663	0.328615	1.35264	14.7121	0.42627	27.856	1.46195	bdl	0.0491791	99.989		1.92958	-	0.0572126	0.0572126	0.00887095	0.00139543	0.0663826	0.375171	0.0129576	1.49032	0.0562159		0.0280932	0.74477	0.220661		77.1465	0.310003	0.262484		1086.78	0.841452
	TA	LH13	#265	53.98	0.282997	1.04616	14.4625	0.342707	27.7201	1.53004	bdl	bdl	99.402		1.94827	-	0.044501	0.044501	0.00768291	-	0.0447005	0.391828	0.0104767	1.49148	0.0591684		0.0296189	0.746616	0.218521		77.3614	0.306236	0.262484		1088.96	0.460474
	TA	LH13	#266	52.9846	0.345188	1.32416	14.8996	0.351724	27.046	1.54838	0.0436995	0.0414828	98.587		1.93271	-	0.0569264	0.0569264	0.00947111	0.00119635	0.0606151	0.393899	0.0108669	1.47071	0.0605154		0.0303091	0.736606	0.227643		76.3946	0.323355	0.262484		1083.42	1.64253
	TA	LH13	#267	53.6927	0.335947	1.23519	14.8849	0.457242	27.0164	1.32022	bdl	0.0590591	99.013		1.95255	0.0474454	0.00549368	0.0529391	0.00918943	0.00169805	0.0226739	0.430005	0.0140838	1.46462	0.0514408		0.0259433	0.738653	0.228301		76.3926	0.323391	0.262484		1084.69	-0.193233
	TA	LH13	#268	53.052	0.350096	1.31271	15.4165	0.427497	27.2001	1.29546	bdl	bdl	99.102		1.9273	-	0.0562047	0.0562047	0.00956676	-	0.0703555	0.398017	0.0131543	1.47308	0.0504248		0.0251491	0.734692	0.233598		75.8781	0.332679	0.262484		1078.06	0.095401
	TA	LH13	#269	53.1757	0.312212	1.34386	14.7265	0.448136	27.0113	1.30745	bdl	0.0449003	98.4		1.94409	0.0559078	0.00199671	0.0579045	0.00858583	0.00129786	0.0360405	0.414217	0.0138771	1.47217	0.0512155		0.0257685	0.740707	0.226542		76.5816	0.32001	0.262484		1084.98	-0.67615
	TA	LH13	#270	53.245	0.347674	1.44581	15.0859	0.399758	27.25	1.46704	bdl	0.0522269	99.329		1.92793	-	0.0616995	0.0616995	0.00946923	0.00149514	0.0644904	0.392325	0.0122602	1.47092	0.056915		0.0285015	0.736598	0.228761		76.3059	0.324947	0.262484		1082.38	1.31754
	TA	LH13	#271	52.7674	0.316391	1.24639	14.775	0.47798	27.3867	1.63651	bdl	0.0657374	98.692		1.92074	-	0.0534701	0.0534701	0.00866275	0.00189186	0.0866275	0.363139	0.0147366	1.48611	0.0638256		0.031684	0.737729	0.223271		76.7696	0.316663	0.262484		1083.99	-0.454636
	TA	LH13	#272	53.0735	0.335055	1.34813	15.0845	0.362235	27.0531	1.52126	0.0452128	0.0415781	98.871		1.93141	-	0.0578208	0.0578208	0.00917157	0.00119629	0.0630047	0.396072	0.0111654	1.46765	0.0593161		0.0296995	0.734851	0.229859		76.1761	0.327283	0.262484		1081.88	1.70505
	TA	LH13	#273	53.5973	0.314849	1.25473	14.93	0.373891	27.2653	1.4213	0.0440299	bdl	99.257		1.94193	-	0.0535794	0.0535794	0.00858069	-	0.0473934	0.404989	0.0114742	1.47269	0.0551759		0.0277026	0.739405	0.227132		76.5033	0.321408	0.262484		1084.06	1.63128
	TA	LH13	#274	53.4118	0.30662	1.21609	14.8991	0.363064	27.2254	1.47861	bdl	0.0486187	98.979		1.9403	-	0.0520659	0.0520659	0.00837843	0.0013964	0.051268	0.401366	0.0111712	1.4744	0.0575518		0.028837	0.738768	0.226798		76.5142	0.321213	0.262484		1083.92	1.03492
	TA	LH13	#275	53.5604	0.317377	1.14084	15.0016	0.398479	27.2236	1.20112	bdl	0.0590011	98.911		1.94864	-	0.0489181	0.0489181	0.00868545	0.00169716	0.0347418	0.421694	0.0122794	1.47653	0.0468216		0.0235041	0.741205	0.229127		76.3896	0.323444	0.262484		1082.5
	TA	LH13	#276	52.9471	0.32391	1.35418	14.8877	0.28442	27.4148	1.36437	bdl	bdl	98.64		1.92731	-	0.0580952	0.0580952	0.00886874	-	0.0702524	0.38295	0.00876909	1.48766	0.0532124		0.0265685	0.742773	0.22628		76.6522	0.318751	0.262484		1082.89	0.796353
	TA	LH13	#279	52.516	0.372754	1.58216	14.9928	0.292463	26.974	1.39735	bdl	0.0482023	98.211		1.923	-	0.0682798	0.0682798	0.0102669	0.0013955	0.0653891	0.39373	0.00907075	1.47245	0.0548232		0.0274739	0.737899	0.230081		76.2337	0.326246	0.262484		1081.61	0.641087
	TA	LH13	#281	52.5364	0.34271	1.63699	14.4812	0.233867	26.9156	1.43089	0.0447853	0.0446171	97.667		1.93127	0.0687282	0.00219451	0.0709227	0.00947631	0.00129676	0.0494763	0.395711	0.0072818	1.47501	0.0563591		0.0284091	0.743514	0.224407		76.8184	0.315797	0.262484		1086.81	1.8878
	TA	LH17	#247	54.4834	0.407196	1.06552	16.0617	0.397777	25.9083	2.82486	bdl	bdl	101.185		1.95431	-	0.0450448	0.0450448	0.0109865	-	0.0251692	0.456641	0.0120852	1.3854	0.108567		0.0546149	0.69693	0.242376		74.1994	0.30438	0.285327		1123.6	2.19035
	TA	LH17	#248	54.3541	0.344885	0.772742	16.6058	0.505036	26.0287	1.67681	bdl	bdl	100.301		1.96822	0.0317793	0.00119922	0.0329786	0.00939389	-	0.0126918	0.490181	0.0154899	1.40509	0.0650577		0.0327169	0.706604	0.25289		73.6465	0.313236	0.285327		1113.57	1.66452
	TA	LH17	#249	54.3483	0.34629	0.7947	16.8955	0.497279	26.2389	1.63709	bdl	bdl	100.791		1.95812	-	0.0337452	0.0337452	0.00938475	-	0.033246	0.475827	0.0151753	1.40931	0.0631973		0.03165	0.7058	0.25495		73.4665	0.316148	0.285327		1110.66	2.84873
	TA	LH17	#250	54.0403	0.378395	0.88863	16.624	0.535052	26.2496	1.70477	bdl	bdl	100.476		1.95204	-	0.037831	0.037831	0.0102812	-	0.0377311	0.464452	0.0163701	1.41352	0.0659796		0.0330219	0.707449	0.251336		73.789	0.31094	0.285327		1112.97	1.73716
	TA	LH17	#263	52.9738	0.429315	1.35839	17.131	0.500806	25.5904	1.80835	bdl	bdl	99.83		1.92996	-	0.0583265	0.0583265	0.011765	-	0.0595229	0.462424	0.015454	1.38987	0.07059		0.0353329	0.695678	0.261254		72.702	0.328678	0.285327		1106.66	2.64595
	TA	LH26-1	#8	54.0615	0.242407	1.04965	16.0706	0.374243	28.0732	1.61014	bdl	bdl	101.499		1.91671	-	0.0438599	0.0438599	0.00646461	-	0.1095	0.366991	0.0112385	1.48378	0.0611651		0.030091	0.729964	0.234416		75.6955	0.267869	0.263462		1073.11
	TA	LH26-1	#24	53.1107	0.396611	1.29845	17.4698	0.534846	26.3044	1.66802	bdl	bdl	100.806		1.91356	-	0.0551367	0.0551367	0.0107487	-	0.0956433	0.430743	0.0163221	1.41285	0.0643925		0.0318782	0.699448	0.260593		72.8592	0.310773	0.263462		1059.45
	TA	LH26-1	#25	54.2451	0.348187	1.40979	15.1906	0.385684	28.3135	1.48766	0.0450271	0.0783623	101.504		1.91762	-	0.0587372	0.0587372	0.00925857	0.0021902	0.0884044	0.360686	0.0115483	1.49212	0.0563478		0.0280462	0.742679	0.223527		76.8683	0.251053	0.263462		1082.29	1.36298
	TA	LH26-1	#26	54.2732	0.329433	1.30213	14.7951	0.30918	28.5845	1.62679	bdl	0.0890387	101.321		1.91881	-	0.0542572	0.0542572	0.0087608	0.00248886	0.0889022	0.34854	0.00925857	1.50656	0.0616242		0.0305845	0.747715	0.217106		77.5006	0.242198	0.263462		1085.98	-0.756587
	TA	LH26-1	#41	55.041	0.202667	0.668293	13.3036	0.336631	29.5208	1.74423	0.040769	bdl	100.89		1.94217	-	0.0277923	0.0277923	0.00537916	-	0.079492	0.313087	0.010061	1.55288	0.0659445		0.0326221	0.768196	0.194205		79.8234	0.210874	0.263462
	TA	LH26-1	#52	54.4441	0.258904	1.24767	13.6785	0.273242	29.4459	1.51729	bdl	0.124943	100.995		1.92041	-	0.0518679	0.0518679	0.00686926	0.00348441	0.0900968	0.313398	0.00816347	1.54837	0.0573434		0.0284248	0.767519	0.20001		79.3304	0.217369	0.263462
	TA	LH26-1	#53	53.8307	0.332166	1.48874	14.8543	0.357958	28.3716	1.76334	bdl	0.110073	101.132		1.90758	-	0.0621767	0.0621767	0.00885396	0.00308396	0.103462	0.336749	0.0107441	1.49881	0.0669519		0.0331985	0.743193	0.218281		77.3	0.244992	0.263462		1085.21	0.324598
	TA	LH26-1	#54	54.4449	0.339067	1.21993	14.3169	0.367292	28.3565	1.49361	bdl	0.0815318	100.653		1.93713	-	0.0511555	0.0511555	0.00907436	0.00229352	0.0564406	0.369556	0.0110687	1.50405	0.0569391		0.0284973	0.752757	0.213206		77.9309	0.236254	0.263462		1090.3	0.828119
	TA	LH26-1	#55	54.6546	0.260309	1.31705	12.6194	0.284776	30.2396	1.49639	0.0424445	0.136389	101.051		1.91651	-	0.0544306	0.0544306	0.00686601	0.00378128	0.0979153	0.272153	0.00845813	1.58078	0.0562217		0.0278943	0.7843	0.183609		81.0328	0.195275	0.263462
	TA	LH26-1	#57	53.72	0.274884	1.16168	14.4035	0.310091	28.8642	1.51513	bdl	0.14843	100.398		1.91218	-	0.0487344	0.0487344	0.00735989	0.00417723	0.108011	0.320752	0.00934905	1.53165	0.0577851		0.0285	0.75542	0.211469		78.1317	0.233503	0.263462		1087.55
	TA	LH26-1	#66	55.9799	0.1936	0.760745	11.8342	0.212383	30.5466	1.65494	bdl	0.0722304	101.256		1.95615	-	0.0313303	0.0313303	0.00508868	0.00199556	0.0443014	0.301529	0.00628601	1.59126	0.0619621		0.0308986	0.793512	0.172455		82.1492	0.181283	0.263462
	TA	LH26-1	#67	55.2571	0.203944	0.838821	12.2698	0.218008	30.5491	1.46887	bdl	0.107793	100.928		1.93759	-	0.0346657	0.0346657	0.00537916	0.00298842	0.0774001	0.282406	0.00647491	1.59691	0.0551862		0.0273418	0.791185	0.178265		81.6142	0.187942	0.263462
	TA	LH26-1	#68	55.2738	0.204079	0.791137	12.8048	0.365826	30.1841	1.5627	bdl	0.100674	101.315		1.93632	-	0.0326636	0.0326636	0.00537755	0.00278836	0.0830533	0.292081	0.0108547	1.57632	0.0586551		0.0290234	0.779984	0.185621		80.7792	0.198508	0.263462
	TA	LH26-1	#100	54.6174	0.181527	1.58335	10.8713	0.184717	31.2313	1.3965	bdl	0.442548	100.536		1.91145	-	0.0653077	0.0653077	0.00477862	0.0122452	0.0907937	0.227382	0.0054755	1.62941	0.0523657		0.026112	0.8125	0.158658		83.6652	0.162882	0.263462
	TA	LH26-1	#101	54.95	0.177763	1.43868	10.0491	0.184735	31.5397	1.38602	bdl	0.395813	100.164		1.925	-	0.0593995	0.0593995	0.00468419	0.010963	0.0711598	0.223247	0.0054815	1.64714	0.0520244		0.0260245	0.823961	0.147273		84.8386	0.149091	0.263462
	TA	LH26-1	#102	54.2305	0.247458	1.60087	11.2973	0.289681	30.3314	1.78461	bdl	0.156951	99.979		1.91462	-	0.0666119	0.0666119	0.00657158	0.00438105	0.088318	0.245239	0.00866253	1.5964	0.067508		0.033651	0.795761	0.16627		82.7191	0.174287	0.263462
	TA	LH26-1	#103	54.2428	0.164598	1.34656	12.7993	0.265771	29.8532	1.29472	bdl	0.288279	100.296		1.91902	-	0.0561459	0.0561459	0.00438018	0.00806351	0.0911874	0.287499	0.00796396	1.57448	0.0490779		0.0244144	0.783242	0.188382		80.6141	0.200623	0.263462
	TA	LH26-1	#119	54.0801	0.21169	0.839078	14.0831	0.333112	29.1054	1.43138	bdl	0.0635993	100.172		1.92612	-	0.0352213	0.0352213	0.00567122	0.00179091	0.101087	0.318384	0.010049	1.54536	0.0546228		0.0269144	0.761447	0.206687		78.6537	0.226417	0.263462
	TA	LH26-2	#170	54.4418	0.216688	1.28281	13.0548	0.288648	29.4448	1.50285	bdl	0.0426522	100.275		1.93025	-	0.0536043	0.0536043	0.00577891	0.00119564	0.0731331	0.313954	0.00866836	1.55632	0.0570916		0.0284156	0.774609	0.192661		80.0846	0.207465	0.263462
	TA	LH26-2	#171	54.7006	0.145369	0.839758	13.1019	0.327706	29.3638	1.55697	bdl	bdl	100.084		1.94434	-	0.0351795	0.0351795	0.00388669	-	0.0685652	0.320901	0.00986621	1.55597	0.0592969		0.0294336	0.772347	0.193322		79.9831	0.208787	0.263462
	TA	LH26-2	#172	54.993	0.191565	1.11474	13.0713	0.236836	29.5697	1.52416	bdl	0.0536033	100.774		1.94077	-	0.0463655	0.0463655	0.00508525	0.00149566	0.0605245	0.325257	0.00707947	1.55569	0.0576329		0.0287276	0.775447	0.192296		80.132	0.206849	0.263462
	TA	LH26-2	#223	54.5604	0.358696	1.15657	15.4861	0.30859	27.9832	1.53188	bdl	bdl	101.389		1.93535	-	0.0483513	0.0483513	0.00957057	-	0.0617102	0.397677	0.00927149	1.47975	0.058221		0.0290143	0.73743	0.228935		76.3126	0.258956	0.263462		1079.87
	TA	LH26-2	#224	54.7872	0.307549	1.0293	15.3829	0.343069	28.3071	1.4508	bdl	0.057092	101.697		1.93513	-	0.0428479	0.0428479	0.00817099	0.00159434	0.0711474	0.383239	0.0102636	1.49051	0.0549051		0.0273151	0.741523	0.226056		76.6398	0.254289	0.263462		1080.81	0.851826
	TA	LH26-2	#225	53.9151	0.304157	1.08187	15.7371	0.273405	27.877	1.52855	bdl	0.0494045	100.807		1.92384	-	0.0454975	0.0454975	0.00816367	0.0013938	0.0909951	0.378615	0.00826323	1.4829	0.0584399		0.0289419	0.734395	0.232571		75.9513	0.264156	0.263462		1075.83	0.683297
	TA	LH26-2	#232	54.2367	0.19718	0.895165	13.4922	0.244491	29.4663	1.4365	bdl	bdl	100.027		1.92894	-	0.0375218	0.0375218	0.00527494	-	0.0946504	0.306643	0.00736502	1.56228	0.05474		0.027023	0.771238	0.198103		79.5657	0.214259	0.263462
	TA	LH26-2	#234	54.4172	0.198389	1.33067	12.4706	0.189479	29.985	1.4348	bdl	0.11752	100.161		1.92476	-	0.0554712	0.0554712	0.00527823	0.00328644	0.0823603	0.286518	0.00567658	1.58108	0.0543757		0.0270525	0.786603	0.183521		81.0852	0.19461	0.263462
	TA	LH26-2	#235	55.1904	0.147092	0.816016	11.9885	0.234459	30.6503	1.58602	bdl	0.0430587	100.683		1.93731	-	0.0337591	0.0337591	0.00388379	0.00119501	0.0840491	0.267882	0.0069709	1.6039	0.059651		0.0294943	0.793047	0.174012		82.0085	0.183027	0.263462
	TA	LH27-2	#1	53.7614	0.36402	1.10062	16.7941	0.434295	26.5176	1.49976	bdl	bdl	100.524		1.93832	-	0.0467679	0.0467679	0.00987211	-	0.0572383	0.449131	0.0132625	1.42527	0.0579363		0.0289271	0.711626	0.252825		73.7886	0.28842	0.268958		1071.01	0.272353
	TA	LH27-2	#2	53.548	0.307196	0.928953	17.1079	0.405967	26.3245	1.43004	bdl	bdl	100.113		1.94039	-	0.039673	0.039673	0.00837321	-	0.0642943	0.454147	0.0124601	1.42205	0.0555223		0.0276441	0.708025	0.258127		73.2861	0.295965	0.268958		1066.91	1.17643
	TA	LH27-2	#3	53.3243	0.272117	0.653005	18.97	0.599308	25.0878	1.28375	bdl	bdl	100.236		1.94796	-	0.0281143	0.0281143	0.00747719	-	0.06231	0.517222	0.0185434	1.36623	0.0502467		0.0249419	0.678181	0.287673		70.219	0.344357	0.268958		1048.71	0.850843
	TA	LH27-2	#4	53.7444	0.278616	0.832944	17.565	0.520902	26.2165	1.36918	bdl	bdl	100.562		1.94303	-	0.0354909	0.0354909	0.0075767	-	0.0642026	0.466864	0.015951	1.41296	0.0530369		0.0263471	0.701912	0.263817		72.6852	0.305124	0.268958		1062.88	-0.194871
	TA	LH27-2	#7	54.1604	0.317944	1.14201	16.1708	0.361151	27.0428	1.50794	bdl	bdl	100.71		1.94279	-	0.0482805	0.0482805	0.00857877	-	0.0487793	0.43632	0.0109728	1.44612	0.0579566		0.0289761	0.723006	0.242532		74.8842	0.272321	0.268958		1077.55
	TA	LH27-2	#8	53.9112	0.318049	1.06922	16.4921	0.36127	27.1543	1.51363	0.0487817	bdl	100.883		1.93042	-	0.0451229	0.0451229	0.00856638	-	0.0801853	0.413676	0.010957	1.44951	0.0580721		0.0288571	0.720289	0.245409		74.5904	0.276592	0.268958		1073.96	1.68676
	TA	LH27-2	#9	53.0783	0.430632	2.10006	17.2312	0.428189	25.7899	1.7829	0.0442654	bdl	100.919		1.91094	0.0890583	4.98368e-05	0.0891082	0.0116618	-	0.0683761	0.450425	0.0130572	1.38417	0.0687748		0.0346507	0.697384	0.261387		72.7404	0.304276	0.268958		1068.88	1.94896
	TA	LH27-2	#27	54.1029	0.29171	0.709357	17.7553	0.560744	26.3933	1.52685	bdl	bdl	101.368		1.94067	-	0.0299883	0.0299883	0.00787068	-	0.0745224	0.458094	0.0170365	1.41134	0.0586814		0.0290549	0.698796	0.263713		72.6046	0.306364	0.268958		1062.38	0.771577
	TA	LH27-2	#28	54.5769	0.275274	1.22743	14.0894	0.35678	28.19	1.5225	0.0432949	0.0955546	100.399		1.9469	-	0.0516045	0.0516045	0.00738634	0.00269501	0.0401258	0.380197	0.0107801	1.49913	0.0581923		0.0292656	0.753928	0.211385		78.1046	0.227614	0.268958
	TA	LH27-2	#29	54.4534	0.289305	0.904269	16.5335	0.421613	27.1793	1.3488	bdl	bdl	101.143		1.94664	-	0.038099	0.038099	0.00777938	-	0.0527602	0.44153	0.0127662	1.44846	0.0516631		0.0257391	0.72164	0.246261		74.5602	0.277032	0.268958		1074.02
	TA	LH27-2	#30	53.8322	0.350547	1.29291	15.9574	0.344077	27.1401	1.50507	bdl	bdl	100.44		1.9338	-	0.0547385	0.0547385	0.00947206	-	0.0589262	0.42046	0.0104691	1.45341	0.0579291		0.0289472	0.726272	0.23955		75.2003	0.267764	0.268958		1079.07	-1.28784
	TA	LH27-2	#31	54.4768	0.262285	0.617718	17.0553	0.472413	26.7273	1.39007	bdl	bdl	101.012		1.9559	-	0.0261386	0.0261386	0.00708335	-	0.0482865	0.46381	0.0143662	1.43054	0.0534743		0.0265979	0.711542	0.254714		73.6422	0.290608	0.268958		1068.82	-1.49857
	TA	LH27-2	#32	53.9583	0.328905	0.926931	17.9128	0.423365	26.4075	1.46584	bdl	bdl	101.451		1.93394	-	0.0391551	0.0391551	0.00886719	-	0.076218	0.460695	0.0128524	1.41098	0.0562917		0.0279081	0.699531	0.266189		72.4394	0.308915	0.268958		1061.07	-0.0098694
	TA	LH27-2	#33	53.9146	0.297322	1.00736	17.782	0.550899	25.8534	1.30907	bdl	bdl	100.785		1.94846	-	0.0429067	0.0429067	0.00808242	-	0.045501	0.49193	0.0168633	1.39287	0.0506897		0.0253721	0.697183	0.269004		72.1614	0.313233	0.268958		1061.74	1.10485
	TA	LH27-2	#34	54.524	0.302339	1.07677	14.8659	0.381198	28.2954	1.50148	bdl	0.0781244	101.055		1.93566	-	0.0450525	0.0450525	0.00807356	0.00219282	0.066881	0.374474	0.0114625	1.4975	0.057113		0.0284508	0.745978	0.219861		77.2391	0.239264	0.268958		1090.17	0.350174
	TA	LH27-2	#35	54.7371	0.317024	1.1283	15.3542	0.30141	27.8068	1.4401	bdl	bdl	101.134		1.9475	-	0.0473125	0.0473125	0.0084843	-	0.040525	0.41633	0.0090832	1.47487	0.0548984		0.0275083	0.739022	0.228919		76.3528	0.251466	0.268958		1086.19	-1.71157
	TA	LH27-2	#36	54.2929	0.315924	1.27146	15.6754	0.326771	27.5941	1.44815	bdl	bdl	100.966		1.93672	-	0.0534543	0.0534543	0.0084769	-	0.0556484	0.411977	0.0098731	1.4674	0.0553492		0.0276711	0.733609	0.233784		75.8366	0.258705	0.268958		1082.5	-2.12149
	TA	LH27-2	#37	53.7305	0.336123	1.29185	15.7374	0.367383	27.5326	1.3847	bdl	bdl	100.411		1.92677	-	0.054598	0.054598	0.00906645	-	0.0741257	0.397828	0.0111587	1.47185	0.0532031		0.0264934	0.732933	0.235017		75.7231	0.26031	0.268958		1080.46	-0.4224
	TA	LH27-2	#42	54.5715	0.303726	1.07797	15.7447	0.328937	27.1591	1.47177	bdl	bdl	100.662		1.95616	0.043843	0.00169779	0.0455408	0.00818935	-	0.0260661	0.44592	0.00998702	1.45131	0.0565265		0.028408	0.729372	0.237201		75.4625	0.264012	0.268958		1082.34	-1.88673
	TA	LH27-2	#44	54.0068	0.430869	1.42948	15.622	0.35625	27.4153	1.7132	bdl	bdl	100.993		1.92703	-	0.0601136	0.0601136	0.0115642	-	0.0623068	0.403848	0.0107666	1.45828	0.065497		0.0327371	0.728885	0.232996		75.78	0.259505	0.268958		1083.64	-3.80513
	TA	LH27-2	#59	54.2359	0.290936	1.24027	13.386	0.264995	29.2522	1.50042	bdl	0.0958124	100.3		1.92554	-	0.0518963	0.0518963	0.0077695	0.00268944	0.0801853	0.317255	0.00796872	1.54822	0.057076		0.028386	0.769989	0.197662		79.5756	0.208398	0.268958
	TA	LH27-2	#60	54.7699	0.243611	1.19599	13.2008	0.309536	29.3076	1.47869	bdl	0.146192	100.689		1.93733	-	0.0498591	0.0498591	0.00648169	0.00408845	0.0594321	0.331065	0.0092738	1.54543	0.0560417		0.0280034	0.772236	0.195127		79.8316	0.205127	0.268958
	TA	LH27-2	#61	54.9542	0.220981	1.1235	12.0738	0.229507	29.8481	1.52243	bdl	0.110464	100.083		1.94612	-	0.0468921	0.0468921	0.00588646	0.00309289	0.0459942	0.311583	0.00688417	1.57578	0.0577671		0.0289124	0.788675	0.178967		81.5072	0.184218	0.268958
	TA	LH27-2	#62	55.3335	0.200145	1.16651	11.8609	0.234753	30.3857	1.45015	bdl	0.0970036	100.736		1.9429	-	0.0482733	0.0482733	0.00528612	0.00269293	0.0531605	0.295125	0.00698167	1.59052	0.0545568		0.0272736	0.795124	0.174112		82.0385	0.177767	0.268958
	TA	LH27-2	#64	54.6055	0.324718	1.09577	13.9554	0.298314	28.7083	1.56167	bdl	0.0426112	100.627		1.93918	-	0.0458624	0.0458624	0.00867398	0.00119641	0.0596211	0.354835	0.00897308	1.51984	0.0594217		0.0296709	0.758899	0.20695		78.576	0.221379	0.268958
	TA	LH27-2	#65	54.9528	0.244488	1.32513	12.3991	0.277247	29.7832	1.53418	bdl	0.153875	100.676		1.93717	-	0.0550541	0.0550541	0.00648282	0.00428864	0.0534583	0.312073	0.00827806	1.56515	0.0579464		0.0290181	0.783788	0.183049		81.0697	0.189593	0.268958
	TA	LH27-2	#66	54.9937	0.222612	1.34852	12.6245	0.288164	29.8704	1.59459	bdl	0.129227	101.079		1.93118	-	0.0558116	0.0558116	0.00588015	0.00358789	0.066974	0.303775	0.00857107	1.56372	0.0599975		0.0299532	0.780675	0.185093		80.8371	0.192475	0.268958
	TA	LH27-2	#67	54.7816	0.290773	1.85579	12.326	0.315235	29.9108	1.42627	bdl	0.0826315	101.007		1.92307	-	0.0767793	0.0767793	0.00767793	0.00229341	0.0594291	0.302431	0.00937305	1.5653	0.0536458		0.0269553	0.786512	0.181823		81.2256	0.187671	0.268958
	TA	LH27-2	#68	54.816	0.251759	1.23507	11.7649	0.256948	30.3052	1.47725	bdl	0.139422	100.275		1.93288	-	0.0513268	0.0513268	0.00667746	0.00388688	0.0674723	0.279457	0.0076741	1.59302	0.0558116		0.0278579	0.795145	0.173167		82.119	0.176797	0.268958
	TA	LH27-2	#70	53.0954	0.40819	1.74851	15.6152	0.39189	27.1348	1.59287	bdl	bdl	100.052		1.9118	-	0.0742013	0.0742013	0.0110555	-	0.0812729	0.388935	0.0119519	1.45654	0.0614527		0.030724	0.728214	0.235086		75.5987	0.262074	0.268958		1081.8	0.804843
	TA	LH27-2	#71	53.3582	0.39819	1.84012	15.805	0.353618	26.9784	1.54783	bdl	bdl	100.338		1.91767	-	0.0779428	0.0779428	0.0107645	-	0.0663809	0.408651	0.0107645	1.44543	0.0596033		0.0299389	0.726044	0.23861		75.2677	0.266797	0.268958		1080.93	0.970037
	TA	LH27-2	#81	53.4633	0.394747	1.71882	15.5825	0.396428	27.0918	1.65239	bdl	bdl	100.349		1.92079	-	0.0727798	0.0727798	0.0106677	-	0.0634082	0.404776	0.0120635	1.45101	0.0636076		0.0318857	0.727373	0.234694		75.6081	0.26194	0.268958		1083.17
	TA	LH27-2	#100	53.757	0.347235	1.77291	14.5816	0.278525	28.4622	1.69328	bdl	0.078148	100.994		1.90477	-	0.0740372	0.0740372	0.00925465	0.00218927	0.0973231	0.33476	0.00835904	1.50343	0.064285		0.0320119	0.748662	0.215164		77.6789	0.233313	0.268958		1093.04	0.326767
	TA	LH27-2	#101	54.193	0.332029	1.62861	14.9455	0.29155	28.0192	1.54262	bdl	0.0567885	101.023		1.92518	-	0.0681869	0.0681869	0.00887227	0.00159502	0.0629034	0.381109	0.00877259	1.48386	0.0587165		0.0294265	0.743655	0.222522		76.9716	0.242916	0.268958		1090.05	-0.649264
	TA	LH27-2	#102	53.7013	0.380832	1.59048	15.7966	0.328352	27.0921	1.66903	bdl	bdl	100.615		1.92493	-	0.0671917	0.0671917	0.0102682	-	0.0633038	0.410228	0.0099691	1.44771	0.0641013		0.0321259	0.725556	0.237322		75.3558	0.265536	0.268958		1081.46	0.488626
	TA	LH27-2	#108	54.5663	0.265051	0.906896	16.7309	0.411918	26.1455	1.49376	bdl	bdl	100.557		1.96991	0.0300895	0.00849703	0.0385865	0.00719748	-	0.00769731	0.497426	0.0125956	1.40711	0.0577798		0.0291433	0.709726	0.254777		73.5877	0.291424	0.268958		1073.15	0.318582
	TA	LH27-2	#110	53.35	0.374647	1.45106	16.7892	0.420781	26.4539	1.54972	bdl	bdl	100.434		1.92422	-	0.0616826	0.0616826	0.0101642	-	0.0713485	0.435066	0.0128547	1.42239	0.0598889		0.0299213	0.710644	0.253012		73.7477	0.289031	0.268958		1070.94	1.00399
	TA	LH27-2	#117	53.8694	0.271191	0.823304	17.681	0.44587	26.0078	1.38415	0.041231	bdl	100.55		1.94904	-	0.035107	0.035107	0.00738044	-	0.0544557	0.480527	0.0136638	1.40278	0.0536578		0.0267608	0.699612	0.266813		72.395	0.309602	0.268958		1062.21	1.5821
	TA	LH27-2	#118	53.8707	0.254494	0.652018	18.8779	0.610218	24.7189	1.36039	0.0409034	bdl	100.392		1.96749	-	0.0280656	0.0280656	0.00699144	-	0.0258683	0.550725	0.0188769	1.34585	0.0532348		0.02669	0.674762	0.289084		70.0106	0.347799	0.268958		1051.07	1.728
	TA	LH27-2	#124	54.0822	0.281305	0.933114	15.6904	0.351715	27.6966	1.48373	bdl	bdl	100.6		1.93534	-	0.0393544	0.0393544	0.00757198	-	0.0765169	0.393046	0.0106606	1.47753	0.0568895		0.028238	0.733396	0.233075		75.8869	0.257995	0.268958		1081.13	1.06998
	TA	LH27-2	#125	55.193	0.141573	0.420867	15.1766	0.344093	28.2727	1.3156	bdl	bdl	100.875		1.96513	-	0.0176607	0.0176607	0.00379156	-	0.0442017	0.407693	0.0103769	1.50066	0.0501883		0.0249306	0.74544	0.224475		76.8591	0.244461	0.268958		1086.49
	TA	LH27-2	#130	54.4857	0.267867	0.966397	15.6973	0.327089	27.8387	1.35554	0.0447437	bdl	101.032		1.94074	-	0.0405692	0.0405692	0.00717685	-	0.0656882	0.401904	0.00986818	1.47823	0.0517332		0.0257709	0.736382	0.232931		75.9724	0.256791	0.268958		1081.79	1.45246
	TA	LH27-2	#131	54.4256	0.284705	0.899091	15.4411	0.272538	27.5554	1.41208	bdl	bdl	100.333		1.95319	-	0.0380277	0.0380277	0.0076854	-	0.0393253	0.424094	0.00828426	1.4742	0.0542968		0.0271457	0.737026	0.231687		76.0859	0.255196	0.268958		1083.96
	TA	LH27-2	#141	54.5513	0.259315	0.662005	15.597	0.411229	27.7236	1.33415	0.0416783	bdl	100.601		1.95228	-	0.0279225	0.0279225	0.00698063	-	0.0560445	0.41076	0.0124654	1.4791	0.051158		0.0254578	0.736043	0.232296		76.0138	0.256209	0.268958		1082.07	1.34509
	TA	LH27-2	#143	55.0916	0.193399	1.46182	9.47864	0.218898	31.8064	1.46687	0.0411931	bdl	100.217		1.92457	-	0.0601863	0.0601863	0.00508196	-	0.0706492	0.206268	0.00647701	1.65642	0.0549051		0.0275252	0.830403	0.138825		85.6787	0.135717	0.268958
	TA	LH27-2	#144	55.2551	0.181922	1.51423	10.2984	0.205314	31.2075	1.33569	bdl	0.461539	100.478		1.93346	-	0.062447	0.062447	0.00478827	0.0127687	0.049379	0.251983	0.00608509	1.62791	0.0500773		0.0252223	0.819927	0.151786		84.3816	0.150284	0.268958
	TA	LH27-2	#166	53.6595	0.310919	1.71978	14.0626	0.318847	27.9508	1.7462	0.0689273	0.0633862	100.01		1.92201	-	0.0726003	0.0726003	0.00837696	0.00179506	0.0696086	0.351633	0.0096734	1.4925	0.0670157		0.033669	0.749837	0.211634		77.9913	0.229126	0.268958
	TA	LH27-2	#167	53.9892	0.339208	1.3366	15.7059	0.379822	26.8879	1.58411	bdl	bdl	100.303		1.94291	-	0.0566895	0.0566895	0.00918209	-	0.040521	0.432157	0.0115774	1.44249	0.0610809		0.0307275	0.725661	0.237787		75.3222	0.266017	0.268958		1082.22	1.20111
	TA	LH27-2	#168	54.5058	0.302712	1.08851	15.8947	0.426189	26.7647	1.42021	bdl	bdl	100.461		1.96197	0.0380319	0.00814613	0.0461781	0.00819611	-	0.0138934	0.464579	0.0129938	1.43622	0.054774		0.0276293	0.724463	0.241353		75.0134	0.270453	0.268958		1080.88	-0.235357
	TA	LH27-2	#1	53.2716	0.315037	0.945234	18.3727	0.614213	24.8979	1.41088	bdl	bdl	99.846		1.95243	-	0.0408296	0.0408296	0.00868502	-	0.0368365	0.526292	0.0190671	1.36035	0.0554044		0.0277306	0.680873	0.281853		70.7268	0.336056	0.268958		1054.81
	TA	LH27-2	#2	53.3736	0.348791	0.966951	16.6205	0.442037	26.0813	1.46917	bdl	bdl	99.332		1.94891	-	0.0416126	0.0416126	0.00957988	-	0.0429099	0.464624	0.0136713	1.41972	0.0574793		0.0287626	0.710426	0.25397		73.6685	0.290214	0.268958		1071.04	0.492775
	TA	LH27-2	#3	53.6824	0.283566	0.802805	16.8236	0.484279	25.9652	1.36543	bdl	bdl	99.447		1.96026	-	0.0345499	0.0345499	0.00778871	-	0.0297569	0.483998	0.0149783	1.41345	0.0534225		0.0267701	0.708281	0.257443		73.3451	0.295074	0.268958		1069.19	0.0416122
	TA	LH27-2	#6	51.9642	0.240488	0.539455	19.1462	0.750629	24.0526	1.34319	bdl	bdl	98.087		1.94693	-	0.0238208	0.0238208	0.00677746	-	0.0695687	0.530337	0.0238208	1.34343	0.0539207		0.0266792	0.664711	0.296824		69.1336	0.362512	0.268958
	TA	LH27-2	#11	52.7756	0.363234	1.42341	14.104	0.419347	27.5868	1.49176	bdl	bdl	98.225		1.92539	-	0.0612026	0.0612026	0.00996785	-	0.0673827	0.36293	0.0129582	1.50036	0.0583119		0.0291277	0.749452	0.214947		77.7146	0.232832	0.268958		1093.93	-1.83229
	TA	LH27-2	#12	52.4241	0.339377	1.50237	15.217	0.311007	26.7916	1.48021	bdl	bdl	98.103		1.92372	-	0.0649742	0.0649742	0.00936745	-	0.0687611	0.398216	0.00966641	1.46561	0.0581978		0.0290924	0.732639	0.233436		75.8396	0.258663	0.268958		1082.69	-0.821091
	TA	LH27-2	#18	52.3674	0.285005	0.811717	17.7455	0.572644	24.8675	1.38807	bdl	bdl	98.066		1.94947	-	0.0356136	0.0356136	0.00798065	-	0.0496795	0.502781	0.0180562	1.38005	0.0553657		0.027601	0.687985	0.275413		71.4156	0.324983	0.268958		1057.34	-0.714994
	TA	LH27-2	#19	52.8128	0.1747	0.441442	18.5866	0.614248	24.5053	1.30905	bdl	bdl	98.466		1.96532	-	0.0193608	0.0193608	0.0048901	-	0.0404182	0.538011	0.0193608	1.35945	0.0521943		0.0259747	0.676533	0.287857		70.1547	0.345416	0.268958		1049.64	-0.612578
	TA	LH27-2	#20	52.554	0.289759	0.929224	17.8703	0.514649	24.9088	1.35613	bdl	bdl	98.454		1.94842	-	0.0406026	0.0406026	0.00808061	-	0.0482841	0.505786	0.0161612	1.3767	0.0538707		0.0269246	0.688073	0.276925		71.3063	0.326725	0.268958		1056.97	1.09414
	TA	LH27-2	#23	52.3192	0.272121	0.898079	14.9044	0.37203	26.9549	1.47048	bdl	bdl	97.205		1.93525	-	0.0391512	0.0391512	0.00757123	-	0.0755131	0.385535	0.0116557	1.48635	0.0582785		0.0288889	0.73679	0.228543		76.3278	0.251814	0.268958		1083.72	-1.36649
	TA	LH27-2	#24	51.9669	0.267255	0.795987	15.3042	0.408223	26.7036	1.50347	bdl	bdl	96.979		1.93031	-	0.0348467	0.0348467	0.00746714	-	0.0902031	0.385205	0.0128435	1.47869	0.0598367		0.029523	0.729577	0.234563		75.6742	0.261002	0.268958		1078.91	-1.02869
	TA	LH27-2	#25	52.0296	0.270866	0.821148	15.5794	0.41146	26.5141	1.40866	bdl	bdl	97.09		1.93273	-	0.0359499	0.0359499	0.0075684	-	0.0841487	0.399831	0.012946	1.46827	0.0560659		0.0277381	0.726413	0.239444		75.2121	0.267594	0.268958		1076.36	0.499478
	TA	LH27-2	#26	52.2349	0.272975	0.896314	15.2161	0.414664	27.083	1.50284	bdl	bdl	97.659		1.92373	-	0.0389045	0.0389045	0.007562	-	0.099898	0.368747	0.012935	1.48693	0.059302		0.0292444	0.733268	0.231109		76.0383	0.255864	0.268958		1080.7	0.538434
	TA	LH27-2	#30	53.9429	0.352151	1.17292	15.3058	0.270383	27.0321	1.38032	0.0455397	0.0488586	99.551		1.95227	0.0477332	0.00229678	0.05003	0.00958658	0.00139804	0.0280607	0.435191	0.0082884	1.45846	0.0535251		0.0269848	0.735287	0.23355		75.8967	0.257857	0.268958		1084.89	1.58594
	TA	LH27-2	#32	53.6751	0.327815	0.987983	15.5157	0.336406	26.7185	1.45497	bdl	bdl	99.02		1.95646	-	0.0424427	0.0424427	0.00898787	-	0.0265641	0.446397	0.010386	1.45184	0.0568233		0.0285256	0.728831	0.237429		75.431	0.264461	0.268958		1081.92
	TA	LH27-2	#33	53.3068	0.370298	1.05887	15.5592	0.393328	26.4875	1.60054	bdl	bdl	98.813		1.9483	-	0.0456111	0.0456111	0.0101801	-	0.0393233	0.436249	0.0121763	1.44319	0.0626778		0.0314393	0.723905	0.238548		75.2175	0.267516	0.268958		1081.2	0.89649
	TA	LH27-2	#36	53.2953	0.356265	1.30162	15.2373	0.335757	26.6743	1.51852	bdl	bdl	98.76		1.94574	0.0542591	0.00174707	0.0560062	0.00978361	-	0.0344423	0.430778	0.0103826	1.45177	0.0594005		0.029898	0.730717	0.234159		75.7346	0.260146	0.268958		1084.62	0.657258
	TA	LH27-2	#37	53.4439	0.359101	1.11787	15.7442	0.367716	27.016	1.6438	bdl	0.0453199	99.77		1.93262	-	0.0476428	0.0476428	0.00976777	0.00129572	0.0674773	0.408651	0.0112628	1.45639	0.0636898		0.0317263	0.725485	0.237178		75.3653	0.2654	0.268958		1080.11	0.0409544
	TA	LH27-2	#38	53.5355	0.365287	1.30323	15.5472	0.373058	26.6811	1.4848	bdl	bdl	99.34		1.94509	0.0549067	0.000898473	0.0558051	0.00998303	-	0.0363382	0.436059	0.0114805	1.44514	0.0578017		0.0290926	0.727364	0.237765		75.3674	0.26537	0.268958		1082.27	1.19482
	TA	LH27-2	#46	52.9928	0.322141	1.01875	15.5812	0.379299	26.6661	1.5043	bdl	bdl	98.51		1.94092	-	0.0439758	0.0439758	0.00887493	-	0.0576372	0.419615	0.0117668	1.45599	0.0590332		0.0294571	0.726526	0.238145		75.3163	0.2661	0.268958		1079.7	0.573761
	TA	LH27-2	#49	52.7305	0.267359	0.857789	15.4034	0.333688	27.1389	1.43815	bdl	bdl	98.218		1.93247	-	0.0370499	0.0370499	0.00737015	-	0.0837608	0.388327	0.010358	1.4827	0.0564713		0.0279338	0.733422	0.233521		75.8525	0.25848	0.268958		1079.96	-0.262468
	TA	LH27-2	#50	52.6304	0.319822	0.995365	14.8744	0.405291	26.8404	1.4632	bdl	bdl	97.538		1.94171	-	0.0432799	0.0432799	0.00887537	-	0.0560445	0.402882	0.0126649	1.4762	0.0578395		0.0288385	0.736028	0.228819		76.2873	0.252378	0.268958		1085.13	-1.37402
	TA	LH27-2	#53	52.7226	0.276376	0.817809	15.2928	0.350628	26.588	1.55976	bdl	bdl	97.608		1.94749	-	0.035603	0.035603	0.00767907	-	0.0540527	0.41836	0.0109701	1.46411	0.0617318		0.0307242	0.728694	0.235122		75.608	0.261941	0.268958		1081.18
	TA	LH27-2	#54	54.1793	0.320061	1.05422	15.2508	0.316905	27.1234	1.58834	bdl	bdl	99.848		1.95511	-	0.0448361	0.0448361	0.00868762	-	0.0284594	0.431785	0.0096862	1.45912	0.0614125		0.0308534	0.733056	0.231225		76.0239	0.256066	0.268958		1086.13	-0.318355
	TA	LH27-2	#55	52.6869	0.406475	1.7789	15.884	0.299738	26.1148	1.70196	bdl	bdl	98.947		1.92519	0.074813	0.00179551	0.0766085	0.0111721	-	0.0522693	0.433117	0.00927681	1.42254	0.0666334		0.0335881	0.717066	0.24467		74.5625	0.276999	0.268958		1078.95	1.41838
	TA	LH27-2	#68	53.2408	0.349953	0.739123	19.0285	0.592725	24.3474	1.46647	0.0419896	bdl	99.807		1.95847	-	0.0320439	0.0320439	0.00968305	-	0.0346394	0.550736	0.0184677	1.33516	0.0577989		0.0289457	0.66865	0.293156		69.5236	0.355923	0.268958
	TA	LH27-2	#73	53.3825	0.403089	1.01978	18.1506	0.512766	25.0495	1.45824	bdl	bdl	99.999		1.95137	-	0.0439341	0.0439341	0.0110834	-	0.0314528	0.523415	0.0158762	1.36505	0.0571143		0.0286588	0.684954	0.278421		71.1027	0.329986	0.268958		1057.65	-0.974944
	TA	LH27-2	#74	53.3376	0.405921	0.855854	18.1476	0.5536	25.0789	1.41467	bdl	bdl	99.823		1.95313	-	0.0369363	0.0369363	0.0111807	-	0.0355387	0.520203	0.0171704	1.36904	0.0555043		0.0277875	0.685392	0.278225		71.1303	0.329543	0.268958		1057.06	0.337407
	TA	LH27-2	#79	52.9931	0.280254	0.715459	18.1686	0.542437	24.8841	1.35453	bdl	bdl	98.993		1.95679	-	0.0311362	0.0311362	0.00778404	-	0.0412155	0.519834	0.0169652	1.36979	0.0535901		0.0267764	0.684418	0.280329		70.946	0.332508	0.268958		1055.04	1.26047
	TA	LH27-2	#80	52.1533	0.324345	0.884889	20.0235	0.655208	23.5824	1.46879	0.0608416	bdl	99.184		1.93895	-	0.038773	0.038773	0.00907029	-	0.0694725	0.553089	0.0206324	1.30702	0.0585084		0.0291272	0.650672	0.309929		67.7394	0.386683	0.268958
	TA	LH27-2	#108	53.5496	0.342564	1.34203	15.4025	0.297745	26.5817	1.42759	0.0410009	bdl	99.009		1.95121	0.0487927	0.00883961	0.0576323	0.00938897	-	0.0233725	0.445976	0.0091892	1.4439	0.0557345		0.0281747	0.729917	0.237263		75.4715	0.263884	0.268958		1083.71	1.71463
	TA	LH27-2	#112	52.8542	0.173385	0.130983	20.353	0.729032	23.0424	1.29422	bdl	bdl	98.607		1.98446	-	0.00579609	0.00579609	0.00489669	-	0.016289	0.62278	0.0231844	1.28973	0.0520649		0.0259799	0.643562	0.318889		66.8705	0.402258	0.268958
	TA	LH27-2	#119	53.1956	0.406358	0.745911	18.2295	0.594	24.6678	1.22441	bdl	bdl	99.115		1.96537	-	0.0324797	0.0324797	0.0112929	-	0.0150906	0.548157	0.0185884	1.35865	0.0484697		0.0243694	0.683097	0.283188		70.6965	0.336548	0.268958		1055.11	0.591292
	TA	LH27-2	#120	53.2224	0.350243	0.825	17.9433	0.541911	25.1473	1.2725	bdl	bdl	99.333		1.95662	-	0.0357455	0.0357455	0.00968523	-	0.0327501	0.518909	0.0168743	1.3782	0.0501236		0.0251013	0.690185	0.276264		71.4178	0.324948	0.268958		1057.9	0.186522
	TA	LH27-2	#121	52.2155	0.473732	1.38898	19.8406	0.515599	22.7097	1.99795	bdl	bdl	99.173		1.94729	0.0527065	0.00834312	0.0610496	0.013289	-	0.0176854	0.601104	0.0162866	1.26256	0.0798341		0.0403719	0.638472	0.31292		67.1128	0.397875	0.268958
	TA	LH27-2	#122	53.0583	0.286872	0.801013	17.507	0.566841	24.9055	1.37702	bdl	bdl	98.536		1.96513	0.0348651	9.99001e-05	0.034965	0.00799201	-	0.0208791	0.521379	0.0177822	1.37512	0.0546454		0.0274626	0.691083	0.272517		71.7221	0.320125	0.268958		1061.37	1.18008

## Sheet: S4b - Opx micro
	Table S4b. Orthopyroxene: complete dataset for the EMPA, chemical formulae and thermobarometry results of Orthopyroxene microlithes from LHPCS lavas
	Rock Type	Sample	Spot																													KD opx-liq(Mg-Fe)	iKD opx-liq(Mg-Fe)		T (°C)	P (kbar)
		(thin section)		SiO2	TiO2	Al2O3	FeOtot	MnO	MgO	CaO	Na2O	Cr2O3	Total		Si	Al[IV]	Al[VI]	AlTot	Ti	Cr	Fe3+	Fe2+	Mn	Mg	Ca		XWo	XEn	XFs		Mg#				[eq. 28a]	[eq. 29a]
				(wt%)											(apfu)
	TR	LH5-1	#83	51.4281	0.259071	0.25237	26.4876	1.13219	15.8102	3.26898	0.0991857	bdl	98.812		2.01098	-	0.0116305	0.0116305	0.00762	-	-	0.866174	0.0374984	0.921619	0.13696		0.0697971	0.469675	0.441418		51.5546	0.479096	0.251272
	TR	LH5-1	#84	51.6746	0.228824	0.815216	26.4763	1.06458	15.1456	3.1505	0.135148	bdl	98.984		2.02507	-	0.0376523	0.0376523	0.00674519	-	-	0.867714	0.0353368	0.884828	0.132286		0.0688932	0.460808	0.451895		50.4923	0.499904	0.251272
	TR	LH5-1	#85	53.093	0.218018	0.371812	22.8724	0.952198	21.8081	1.38503	bdl	bdl	100.743		1.97243	-	0.0162797	0.0162797	0.00609238	-	0.0283645	0.682247	0.0299625	1.20779	0.0551311		0.0275174	0.602841	0.354686		62.9619	0.299923	0.251272		987.928	1.08521
	TR	LH5-1	#86	52.9253	0.227741	0.401983	22.8589	0.884836	21.6446	1.31652	bdl	bdl	100.31		1.97597	-	0.0176881	0.0176881	0.00639568	-	0.0184875	0.695231	0.0279811	1.20469	0.0526645		0.0263447	0.602629	0.357029		62.8	0.30201	0.251272		987.353	0.206415
	TR	LH5-1	#87	53.4573	0.190398	0.37372	23.0479	0.880518	21.9272	1.34422	bdl	bdl	101.234		1.97642	-	0.0162845	0.0162845	0.00529497	-	0.0202807	0.692342	0.0275738	1.20855	0.0532494		0.0265981	0.603673	0.355956		62.9106	0.300582	0.251272		987.486
	TR	LH6-1	#251	52.593	0.237244	0.524302	23.807	0.889917	20.7752	1.39954	0.0673129	bdl	100.307		1.97228	-	0.0231728	0.0231728	0.00669214	-	0.0233725	0.72325	0.0282668	1.16144	0.0562339		0.028222	0.582886	0.374705		60.8738	0.235584	0.247071		959.876	2.6317
	TR	LH6-1	#252	53.0442	0.257044	0.612916	23.3348	0.776757	21.2774	1.47871	bdl	bdl	100.804		1.97412	0.0258845	0.0009994	0.0268839	0.00719568	-	0.0120927	0.714171	0.0244853	1.18049	0.0589646		0.0296274	0.593151	0.364919		61.9148	0.225461	0.247071
	TR	LH6-1	#253	52.9591	0.275066	0.652058	23.2273	0.840691	21.3034	1.55989	0.0471203	bdl	100.868		1.96883	-	0.02857	0.02857	0.00769192	-	0.0216772	0.700465	0.0264722	1.18066	0.0621348		0.0312014	0.592877	0.362629		62.0523	0.224149	0.247071
	TR	LH6-1	#255	52.8217	0.307502	0.446651	23.8813	0.897716	20.3576	1.40195	0.0658192	bdl	100.199		1.98784	0.0121564	0.00765402	0.0198104	0.00870457	-	-	0.751595	0.028615	1.1421	0.0565297		0.0285671	0.577156	0.379816		60.3145	0.241168	0.247071		959.814	2.6734
	TR	LH6-1	#266	52.2938	0.259292	0.500932	22.4362	0.886841	20.9082	1.45133	0.0407813	bdl	98.791		1.9846	0.0154039	0.00700175	0.0224056	0.00740185	-	-	0.712078	0.0285071	1.1829	0.0590148		0.0297679	0.59667	0.359183		62.4265	0.220608	0.247071
	TR	LH6-1	#267	52.1358	0.217498	0.427633	22.9609	0.856723	21.0175	1.44317	bdl	bdl	99.112		1.97447	-	0.0190871	0.0190871	0.00619582	-	0.019187	0.708022	0.0274815	1.1866	0.0585605		0.0292824	0.593344	0.363632		62.0057	0.224592	0.247071
	TA	LH13	#242	52.0801	0.371903	1.06472	19.5925	0.51271	23.2705	1.41733	bdl	bdl	98.375		1.95251	-	0.0470447	0.0470447	0.0104877	-	0.0276675	0.586611	0.0162809	1.30057	0.0569331		0.0286375	0.65419	0.308983		67.9238	0.494188	0.262484
	TA	LH13	#249	51.1032	0.59757	0.609771	20.6992	0.583131	21.9177	1.74147	bdl	bdl	97.33		1.95252	-	0.0274581	0.0274581	0.0171738	-	0.0358453	0.625546	0.0188712	1.2484	0.0712913		0.0356465	0.624214	0.330704		65.3719	0.554329	0.262484
	TA	LH17	#358	52.8243	0.400745	0.557204	19.0522	0.530653	22.6721	3.44134	0.108275	bdl	99.619		1.95888	-	0.0243525	0.0243525	0.0111782	-	0.0431159	0.547732	0.0166675	1.25336	0.136733		0.0684487	0.627429	0.295778		67.9654	0.412589	0.285327
	TA	LH17	#367	53.9059	0.432302	1.15191	18.8454	0.553473	21.4855	3.49266	0.14675	bdl	100.253		1.99879	0.00120573	0.0491334	0.0503391	0.0120573	-	-	0.584376	0.0173826	1.18764	0.138759		0.0719646	0.615946	0.303075		67.0255	0.430649	0.285327
	TA	LH17	#370	55.0651	0.477257	1.23001	18.5796	0.572661	21.3842	3.48605	0.185155	bdl	101.152		2.02316	-	0.0532622	0.0532622	0.0131897	-	-	0.570882	0.0178212	1.17126	0.137233		0.0723346	0.617365	0.300907		67.2346	0.426587	0.285327
	TA	LH26-1	#120	53.8167	0.255364	0.829071	14.6732	0.377966	28.696	1.4134	bdl	0.0492939	100.129		1.9232	-	0.0349184	0.0349184	0.00686431	0.00139276	0.104357	0.334162	0.0114405	1.52875	0.0541186		0.0266223	0.752031	0.215719		77.712	0.23927	0.263462		1068.92	-0.920637
	TA	LH26-1	#134	55.0748	0.259215	1.06216	14.1883	0.356976	28.8122	1.46637	bdl	0.0857784	101.335		1.94375	-	0.0441807	0.0441807	0.00688142	0.00239354	0.0541538	0.364616	0.0106712	1.51591	0.0554503		0.0277141	0.757651	0.209301		78.3573	0.23043	0.263462		1076.8	0.403799
	TA	LH26-1	#135	54.7945	0.266905	1.21641	14.36	0.29712	28.9299	1.45414	bdl	0.118023	101.464		1.9308	-	0.0505169	0.0505169	0.00707436	0.00328808	0.0721385	0.351028	0.00886785	1.51969	0.054901		0.0273598	0.757337	0.210884		78.2221	0.232269	0.263462		1074.96	0.171259
	TA	LH26-1	#136	55.1925	0.246087	1.45219	12.453	0.208454	30.0314	1.44587	bdl	0.223317	101.291		1.93235	-	0.0599217	0.0599217	0.00648072	0.00618161	0.058825	0.30579	0.00618161	1.56744	0.0542386		0.0272218	0.786679	0.182996		81.1305	0.194035	0.263462
	TA	LH26-1	#137	55.1126	0.260208	1.09751	13.5439	0.257873	29.5219	1.46933	bdl	0.0896945	101.375		1.93641	-	0.0454478	0.0454478	0.00687696	0.00249165	0.0669756	0.330991	0.00767429	1.54632	0.0553147		0.0275571	0.770357	0.198262		79.5341	0.214676	0.263462
	TA	LH26-1	#138	54.6171	0.233607	1.30337	12.6104	0.29111	30.2681	1.39929	bdl	0.154141	100.899		1.91794	-	0.0539424	0.0539424	0.00617054	0.00427957	0.0950462	0.275286	0.00865865	1.58453	0.0526486		0.0261131	0.785912	0.183681		81.0583	0.194951	0.263462
	TA	LH26-1	#139	55.178	0.230691	1.29372	12.4156	0.248529	30.2067	1.43899	bdl	0.115135	101.142		1.93332	-	0.0534237	0.0534237	0.00607994	0.00318947	0.0655836	0.298216	0.00737566	1.57779	0.0540217		0.0269705	0.787719	0.181628		81.2653	0.19233	0.263462
	TA	LH26-1	#140	55.383	0.207267	1.09193	12.2227	0.187412	29.9975	1.49741	bdl	0.103973	100.694		1.9498	-	0.0453071	0.0453071	0.00548875	0.00289407	0.0414151	0.318447	0.00558854	1.57437	0.0564842		0.0282943	0.788642	0.180264		81.3975	0.190662	0.263462
	TA	LH26-1	#141	54.3829	0.302835	1.13341	14.0025	0.295498	29.0322	1.49345	bdl	0.13872	100.815		1.926	-	0.0473084	0.0473084	0.00806733	0.00388427	0.0823664	0.332354	0.0088641	1.53279	0.0566705		0.0281516	0.761429	0.206016		78.7078	0.225688	0.263462
	TA	LH26-1	#153	53.9355	0.320608	1.52751	13.5265	0.341002	29.0431	1.52058	0.0477279	0.0886687	100.36		1.91488	-	0.0639156	0.0639156	0.0085619	0.00248892	0.0899995	0.311613	0.0102544	1.53716	0.0578426		0.0288223	0.765949	0.200119		79.2878	0.217934	0.263462
	TA	LH27-2	#149	53.4454	0.402452	1.12461	16.1066	0.405701	25.9649	1.40758	bdl	bdl	98.904		1.95857	0.0414262	0.00714589	0.0485721	0.0110936	-	0.013892	0.479724	0.0125928	1.41848	0.0552682		0.0279138	0.71642	0.249306		74.1877	0.282501	0.268958		1061.48	0.832622
	TA	LH27-2	#150	53.0239	0.383208	1.22972	17.0952	0.359396	24.4784	1.68203	bdl	bdl	98.275		1.96983	0.0301734	0.0236683	0.0538417	0.0107083	-	-	0.531112	0.0113088	1.35565	0.0669519		0.0340718	0.689891	0.270283		71.8539	0.318049	0.268958		1052.97	-0.163435
	TA	LH27-2	#131	53.3315	0.253934	0.803488	15.2256	0.409729	25.7193	1.4588	bdl	bdl	97.253		1.98429	0.0157149	0.0195185	0.0352335	0.00710675	-	-	0.47375	0.0129123	1.42656	0.0581552		0.0294999	0.723635	0.240315		75.0728	0.269598	0.268958		1068.39	0.941457
	TA	LH27-2	#132	53.6086	0.228382	0.606173	15.0574	0.379881	27.0728	1.37427	bdl	bdl	98.353		1.96257	-	0.0261542	0.0261542	0.00628899	-	0.0355378	0.425455	0.0117794	1.47751	0.0539057		0.0268964	0.737212	0.230014		76.2221	0.25329	0.268958		1069.27	-3.95597
	TA	LH27-2	#135	54.1093	0.296754	0.91892	15.2569	0.357889	27.037	1.40173	bdl	bdl	99.43		1.9611	0.0389023	0.000349572	0.0392519	0.00809009	-	0.0242703	0.438163	0.0109865	1.46081	0.0544333		0.0273718	0.734569	0.232535		75.9585	0.256987	0.268958		1069.72	0.92391
	TA	LH27-2	#136	53.423	0.357523	1.20842	15.5142	0.382299	26.8034	1.39582	bdl	0.0832997	99.212		1.94277	-	0.0517925	0.0517925	0.00977971	0.00239503	0.042911	0.42891	0.0117756	1.45308	0.0543871		0.0273156	0.729802	0.236969		75.4916	0.263598	0.268958		1066.58	0.770641
	TA	LH27-2	#137	54.1053	0.291125	0.987815	15.5884	0.340353	27.35	1.37115	0.0400307	bdl	100.103		1.94708	-	0.0418963	0.0418963	0.0078805	-	0.0502756	0.418863	0.0103743	1.46727	0.0528691		0.0264392	0.733762	0.23461		75.7756	0.259566	0.268958		1066.77	1.12088
	TA	LH27-2	#138	54.0869	0.297784	1.08166	15.1114	0.378719	27.2402	1.45047	bdl	0.052464	99.726		1.95268	-	0.0460241	0.0460241	0.00808666	0.00149753	0.0326461	0.423601	0.0115809	1.46608	0.0561074		0.0281945	0.736718	0.229268		76.2688	0.252637	0.268958		1071.46	0.359442
	TA	LH27-2	#139	53.9692	0.329242	1.01796	15.6392	0.334621	26.7683	1.34574	bdl	bdl	99.451		1.95944	0.0405615	0.00299715	0.0435586	0.00899146	-	0.0190819	0.455767	0.0102902	1.44882	0.0523503		0.0263555	0.729403	0.23906		75.3185	0.26607	0.268958		1066.24	-1.01366
	TA	LH27-2	#140	54.2704	0.291879	0.884262	15.9345	0.400294	27.2717	1.37729	0.0659351	bdl	100.523		1.94735	-	0.0373953	0.0373953	0.00787794	-	0.0560431	0.422118	0.0121659	1.45882	0.0529517		0.0264482	0.728645	0.238831		75.317	0.266091	0.268958		1063.95	1.8999
	TA	LH27-2	#141	54.4118	0.271353	0.697417	15.2541	0.37775	27.0743	1.39784	bdl	bdl	99.506		1.97147	0.0285322	0.00124922	0.0297814	0.00739538	-	0.0133916	0.448819	0.0115928	1.46239	0.0542661		0.0272631	0.734699	0.232214		75.9869	0.256586	0.268958		1069.92	-0.526901
	TA	LH27-2	#142	53.9614	0.292602	0.905718	15.2743	0.367037	27.0325	1.41223	bdl	0.0487159	99.301		1.95895	-	0.0387516	0.0387516	0.00799001	0.00139825	0.0259675	0.437753	0.0112859	1.46297	0.0549313		0.0275634	0.734088	0.232685		75.9347	0.257321	0.268958		1069.17
	TA	LH27-2	#144	52.972	0.250032	0.48101	19.4144	0.773984	23.7719	1.37917	0.0401864	bdl	99.108		1.96899	-	0.0210721	0.0210721	0.00699074	-	0.0298604	0.57364	0.0243677	1.31725	0.0549272		0.0274629	0.658611	0.301743		68.5835	0.371932	0.268958
	TA	LH27-2	#146	53.044	0.23871	0.527542	19.5767	0.6771	23.3736	1.4282	bdl	bdl	98.919		1.97866	0.0213431	0.0018494	0.0231925	0.00669782	-	0.00779747	0.602904	0.021393	1.29978	0.0570814		0.0286992	0.653498	0.307047		68.0376	0.38143	0.268958
