# Supplementary material for: Anatomy of the magmatic plumbing system of Los Humeros Caldera (Mexico): implications for geothermal systems
Source: Copernicus journal article supplement (doi:10.5194/se-2019-86), 2019-05-22
Supplement: Supplementary file 6 [file S-Table5 - Opq.xlsx]

## Sheet: S5a - Opaque pheno
	Table S5a. Opaque and Spinel: complete dataset for the EMPA, chemical formulae and thermobarometry results of Opaque and Spinel phenocrysts from LHPCS lavas
	Spinel
	Rock Type	Sample	Spot	SiO2	TiO2	Al2O3	FeOtot	MnO	MgO	CaO	Cr2O3	Total		Fe2+	Mn	Mg	Si	Ti	Al	Cr	Fe3+
		(thin section)		(wt%)										(apfu)
	TR	LH5-1	#1	0.0735945	15.3267	1.91398	74.8687	0.52941	1.41098	bdl	0.0714358	94.279		1.34335	0.0170115	0.0797983	0.00279197	0.437365	0.085577	0.00214267	1.03197
	TR	LH5-1	#3	bdl	15.2724	1.902	75.4365	0.453579	1.4174	bdl	0.0802633	94.599		1.33979	0.01452	0.07986	-	0.434174	0.0847216	0.00239839	1.04453
	TR	LH6-1	#195	bdl	19.791	1.27793	68.1497	0.372685	1.57234	bdl	bdl	91.234		1.48236	0.0124531	0.0924707	-	0.587282	0.0594171	-	0.766019
	TR	LH6-1	#196	bdl	2.47805	7.74916	76.585	2.23103	3.71423	bdl	bdl	92.802		0.797646	0.0687404	0.201418	-	0.0678047	0.332224	-	1.53217
	TR	LH6-1	#197	0.0905733	19.2548	1.21679	68.799	0.409912	1.49641	0.0407011	0.0403074	91.363		1.47058	0.0136697	0.0878294	0.003566	0.57023	0.0564617	0.00125471	0.794691
	TR	LH6-1	#215	0.114191	11.4232	2.18212	76.6591	0.466976	1.18007	0.0772289	0.0481433	92.223		1.24989	0.0152787	0.0679552	0.00441101	0.331913	0.0993437	0.00147034	1.22654
	TA	LH13	#161	0.234483	3.52135	0.793205	85.169	0.0637457	0.0703669	0.112303	0.0643884	90.103		1.10364	0.002149	0.00417519	0.00933279	0.105424	0.0372084	0.0020262	1.73125
	TA	LH13	#182	0.0484076	13.8042	2.62575	74.3354	0.36128	2.48061	bdl	0.734717	94.421		1.24021	0.0114356	0.138196	0.00180902	0.388035	0.115648	0.0217082	1.08296
	TA	LH13	#183	0.08357	13.1009	2.7466	73.6727	0.306064	2.15768	0.117791	1.09583	93.301		1.23983	0.00981278	0.121756	0.00316333	0.373015	0.122531	0.0327954	1.09232
	TA	LH13	#184	0.0688566	13.4497	2.88467	73.7421	0.296724	2.41221	bdl	0.988477	93.881		1.23803	0.00943843	0.135047	0.00258587	0.379929	0.127677	0.0293497	1.07794
	TA	LH13	#174	0.0422183	18.486	1.70941	67.6533	0.524362	1.98126	0.0630446	0.867186	91.406		1.41004	0.0173739	0.11554	0.00165151	0.543941	0.07881	0.0268205	0.803184
	TA	LH17	#300	bdl	6.47713	7.13041	54.2324	0.36803	4.1833	0.0496301	22.1418	94.618		0.937302	0.0113029	0.226125	-	0.176658	0.304714	0.63476	0.70721
	TA	LH17	#301	bdl	6.1409	7.56164	53.9878	0.409396	4.56754	0.0571122	22.4875	95.25		0.906859	0.0124321	0.244122	-	0.165607	0.319512	0.637429	0.711845
	TA	LH17	#302	bdl	6.09834	7.93689	53.7731	0.451127	4.41585	0.117721	22.2525	95.126		0.910136	0.0137126	0.236243	-	0.164618	0.335693	0.631379	0.703692
	TA	LH21-2	#24	0.483965	18.3245	1.43215	70.9723	0.500718	1.33069	0.110129	bdl	93.273		1.45256	0.0163466	0.07646	0.0186536	0.531265	0.0650569	-	0.835106
	TA	LH26-1	#23	0.0769777	6.50697	1.5172	82.3283	0.0776287	1.00153	bdl	0.0669365	91.592		1.13258	0.00255441	0.0580038	0.00299053	0.190148	0.0694675	0.00205599	1.5422
	TA	LH26-1	#65	0.128825	7.74817	0.37773	78.9642	0.808607	3.4621	0.101971	bdl	91.644		1.00006	0.0262096	0.197508	0.0049299	0.223031	0.0170362	-	1.52704
	TA	LH26-1	#75	bdl	5.19902	0.396764	82.7932	0.364902	2.56955	bdl	0.0789941	91.545		0.991172	0.0119151	0.147673	-	0.150759	0.0180269	0.0024077	1.67805
	TA	LH26-1	#76	bdl	5.01268	0.347741	83.6516	0.449711	2.46564	0.063001	0.0935092	92.104		0.986459	0.0145876	0.140767	-	0.144399	0.0156955	0.00283135	1.69268
	TA	LH26-2	#182	bdl	13.9512	3.30225	75.9865	0.321667	3.83072	bdl	0.0570533	97.47		1.16118	0.00973503	0.204049	-	0.37496	0.139063	0.00161176	1.10941
	TA	LH26-2	#183	0.0469965	14.0506	3.36338	75.8048	0.303037	3.84243	bdl	0.0708727	97.533		1.16536	0.00916523	0.20454	0.00167814	0.377388	0.141545	0.00200086	1.09832
	TA	LH27-2	#13	0.623166	13.2978	3.12984	70.5856	0.393575	2.41821	0.120387	0.0805136	90.672		1.25395	0.0129084	0.139592	0.0241303	0.387316	0.142836	0.00246492	1.03181
	TA	LH27-2	#14	0.261931	13.4299	3.00384	70.8047	0.413639	2.46655	0.113668	0.0801856	90.577		1.2411	0.0135919	0.142651	0.0101616	0.391901	0.137343	0.00245949	1.05607
	TA	LH27-2	#15	0.0887172	12.7403	2.99074	74.5448	0.279984	2.40792	0.0875778	0.103579	93.269		1.21692	0.00894447	0.13539	0.00334613	0.361447	0.132944	0.00308874	1.13438
	TA	LH27-2	#45	0.119612	12.4783	3.31723	73.9388	0.296556	2.67527	0.0685758	0.142641	93.041		1.19553	0.00945784	0.150167	0.00450373	0.353414	0.147208	0.00424638	1.13271
	TA	LH27-2	#46	0.113402	12.351	3.3327	74.7039	0.332685	2.61403	0.0465051	0.121699	93.667		1.19376	0.0105498	0.145896	0.00424565	0.347821	0.147054	0.00360237	1.14521
	TA	LH27-2	#47	0.121986	12.2772	3.18819	75.1518	0.369179	2.58507	bdl	0.108654	93.85		1.19412	0.0116947	0.144127	0.0045622	0.345378	0.140529	0.00321282	1.15638
	TA	LH27-2	#169	0.0561734	12.3312	3.23093	73.602	0.305474	2.92085	bdl	0.0925786	92.621		1.17833	0.00977869	0.164565	0.00212301	0.350553	0.143914	0.00276634	1.14797
	TA	LH27-2	#4	0.0751157	14.0329	2.30603	74.1467	0.399078	2.38653	bdl	0.0669368	93.452		1.25477	0.0127868	0.134585	0.00284152	0.399298	0.102811	0.00200198	1.09091
	TA	LH27-2	#21	0.0559878	13.4636	1.92674	72.611	0.417991	1.99602	0.0599385	0.0978898	90.633		1.26573	0.013857	0.116463	0.00219133	0.396374	0.0888779	0.0030292	1.11096
	TA	LH27-2	#22	0.0674914	13.5377	1.99591	72.3379	0.400356	2.01631	0.0491633	0.0749535	90.503		1.26855	0.0132886	0.117791	0.00264482	0.399045	0.0921817	0.00232228	1.10212
	AB	LH5-2	#46	0.102558	0.621478	39.0511	18.8914	0.27314	16.0517	bdl	21.1226	96.141		0.314585	0.0067218	0.695255	0.00297977	0.0135822	1.33722	0.485217	0.144438
	AB	LH5-2	#47	0.106214	0.670729	39.9217	18.6556	0.228	15.8479	bdl	21.751	97.221		0.33233	0.00555581	0.679684	0.0030557	0.0145146	1.3536	0.494745	0.11651
	AB	LH5-2	#10	0.0650775	8.55317	6.60614	48.1018	0.548499	3.01818	0.190649	25.8044	92.895		1.04984	0.0174041	0.168555	0.00243792	0.241016	0.29167	0.764289	0.457133
	AB	LH5-2	#128	0.0853821	0.544852	42.9726	19.2787	0.236171	16.1104	bdl	17.7477	97.01		0.325534	0.0056876	0.682859	0.00242763	0.0116526	1.44	0.398964	0.132872
	AB	LH5-2	#129	0.894294	0.990228	40.3143	20.3092	0.276053	15.1509	0.400455	18.6008	96.985		0.377185	0.00673876	0.650951	0.025774	0.0214668	1.36936	0.423847	0.112313
	AB	LH5-2	#130	0.0901537	0.826365	38.7483	19.9207	0.193269	15.0582	bdl	21.4071	96.281		0.359492	0.00478768	0.656536	0.00263669	0.0181793	1.33562	0.495004	0.127741
	AB	LH5-2	#131	0.0768782	0.712244	41.7717	17.4376	0.153166	15.7336	bdl	19.7299	95.615		0.334848	0.00375635	0.679134	0.00222598	0.0155123	1.42546	0.451666	0.087393
	AB	LH5-2	#132	0.0607074	0.619831	42.5735	18.7257	0.194951	16.1928	bdl	18.1147	96.514		0.320566	0.00471829	0.689772	0.00173467	0.0133222	1.43374	0.409242	0.126908
	AB	LH5-2	#94	0.0886012	21.9647	0.0779105	65.7865	0.209211	0.0615947	0.181924	bdl	88.41		1.67106	0.00736476	0.00381628	0.00368238	0.686663	0.00381628	-	0.615493
	AB	LH5-2	#40	0.391743	23.1278	0.207184	71.4095	0.582797	0.26278	0.159036	bdl	96.211		1.63697	0.0187914	0.0149127	0.0149127	0.662246	0.00929538	-	0.636388
	AB	LH18-1	#5	0.102407	0.871974	42.8393	18.1407	0.230295	16.9217	bdl	17.267	96.381		0.298625	0.00554721	0.717393	0.00291228	0.0186525	1.43583	0.388235	0.132809
	AB	LH18-1	#6	0.0606525	1.00632	41.8701	19.1062	0.166131	16.6355	bdl	17.6565	96.521		0.311061	0.00401875	0.708271	0.00173222	0.0216181	1.40934	0.398688	0.145276
	AB	LH18-1	#7	0.121838	0.581795	44.3258	17.8484	0.205494	17.2581	bdl	17.5142	97.893		0.292615	0.00485841	0.718143	0.00340089	0.0122154	1.45822	0.386521	0.124028
	AB	LH18-1	#39	0.0985723	0.865516	35.1743	25.4597	0.238168	13.249	0.0427901	20.6178	95.753		0.421349	0.00606423	0.593743	0.0029632	0.0195709	1.2462	0.490031	0.218703
	AB	LH27-1	#101	0.177545	20.5529	bdl	70.7322	0.636754	0.246058	0.137566	0.0402514	92.566		1.57662	0.0213245	0.0145033	0.00701987	0.611258	-	0.00125828	0.762185
	AB	LH27-1	#108	0.430307	18.304	bdl	71.718	0.463436	bdl	0.206937	bdl	91.295		1.5449	0.0157454	-	0.0172607	0.552276	-	-	0.860926
	AB	LH27-1	#22	1.54405	1.83125	0.286626	85.1756	0.444356	0.30317	0.244739	bdl	89.831		1.07267	0.0149391	0.0179391	0.061287	0.0546746	0.0134084	-	1.75467
	AB	LH27-1	#64	bdl	3.37667	14.5602	35.5034	0.409977	5.80477	0.15001	35.4504	95.301		0.770564	0.0120322	0.299842	-	0.0880068	0.594596	0.971169	0.258222
	AB	LH27-1	#101	bdl	21.5868	1.79599	62.5813	0.584706	1.80648	0.138173	5.47483	93.997		1.49395	0.0189617	0.103109	-	0.621688	0.0810428	0.165729	0.509852
	AB	LH27-1	#107	bdl	21.3844	1.64555	59.5089	0.414773	2.18587	0.192382	9.5149	94.903		1.46515	0.0133191	0.123542	-	0.609826	0.0735271	0.285206	0.421614
	AB	LH27-1	#216	0.0482031	0.666467	38.0673	19.8769	0.193494	15.9522	0.0472379	23.2439	98.109		0.326331	0.00470903	0.683294	0.00138501	0.0144041	1.2891	0.528035	0.151289
	AB	LH27-1	#217	bdl	0.643399	39.2655	19.267	0.250156	16.0301	bdl	21.7804	97.288		0.319839	0.0061001	0.687994	-	0.0139332	1.33232	0.495772	0.144045
	AB	LH27-1	#218	0.0888943	0.651587	37.3315	19.7969	0.198557	15.9406	bdl	24.0427	98.062		0.326839	0.00484787	0.685004	0.00256245	0.0141281	1.26827	0.547948	0.150399
	Rutile
	Rock Type	Sample	Spot	SiO2	TiO2	Al2O3	FeOtot	MnO	MgO	CaO	Cr2O3	Total		Fe2+	Mn	Mg	Ti	Al	Cr	Fe3+
		(thin section)		(wt%)										(apfu)
	TA	LH26-1	#80	bdl	91.5917	0.0868069	5.44264	bdl	0.467254	0.0406321	0.0440511	97.711		0.122553	-	0.0187551	1.855	0.00275466	0.000937756	-
	Ilmenite
	Rock Type	Sample	Spot	SiO2	TiO2	Al2O3	FeOtot	MnO	MgO	CaO	Cr2O3	Total		Fe2+	Mn	Mg	Ti	Al	Cr	Fe3+
		(thin section)		(wt%)										(apfu)
	TR	LH5-1	#39	bdl	47.505	0.101434	44.7731	0.500822	3.17533	bdl	bdl	96.109		0.779444	0.010814	0.120674	0.910932	0.00304758	-	0.175088
	TR	LH5-1	#40	bdl	47.6955	0.10816	44.6638	0.538151	3.17162	bdl	bdl	96.237		0.781576	0.0116073	0.120401	0.913584	0.00324611	-	0.169585
	TR	LH6-1	#203	0.0605178	51.4737	0.206998	38.9503	0.399669	2.0564	0.0635422	bdl	93.251		0.869328	0.00903447	0.081815	1.03331	0.00651088	-	-
	TR	LH6-1	#204	bdl	43.6111	0.358984	46.2975	0.506026	1.9669	0.0892756	bdl	92.889		0.781963	0.0113831	0.0778739	0.87122	0.0112365	-	0.246324
	TA	LH13	#156	0.244438	46.9136	bdl	45.3773	1.72707	1.10838	0.139712	0.0503296	95.701		0.842317	0.0382984	0.0432593	0.923874	-	0.0010418	0.151209
	TA	LH15	#58	bdl	45.405	0.620994	46.8045	0.422702	4.79138	0.0609231	0.0525395	98.158		0.653491	0.00877852	0.175134	0.837403	0.017945	0.0010185	0.30623
	TA	LH26-1	#7	bdl	37.9759	0.668601	49.0902	0.384964	3.45706	0.113275	bdl	91.749		0.608422	0.00859353	0.135825	0.752841	0.0207677	-	0.473551
	TA	LH26-1	#77	bdl	35.2789	2.76959	53.1102	0.219723	1.69635	0.0885504	0.069232	93.272		0.618856	0.00483481	0.0656965	0.689387	0.0847988	0.001422	0.535005
	TA	LH26-1	#78	bdl	42.2357	0.763008	46.2851	0.142151	4.28312	bdl	bdl	93.781		0.648775	0.00309194	0.163969	0.815837	0.0230929	-	0.345234
	TA	LH26-1	#79	bdl	41.1246	0.595395	48.5322	0.168352	3.8135	bdl	bdl	94.339		0.643333	0.00365393	0.145677	0.792663	0.0179812	-	0.396692
	TA	LH27-2	#77	bdl	45.9628	0.122214	45.6146	0.464818	3.5363	0.0448107	bdl	95.838		0.736219	0.0100269	0.134263	0.880509	0.00366838	-	0.235314
	AB	LH5-2	#70	2.55906	48.2973	1.01008	43.1332	0.841376	2.07922	0.438377	0.0409712	99.108		0.839835	0.0184062	0.0800565	0.938297	0.0307467	0.000836645	0.0918218
	AB	LH5-2	#37	1.69977	47.1551	0.334431	43.3378	0.590632	0.789372	0.205156	bdl	94.433		0.915993	0.0135604	0.0318977	0.961451	0.0106839	-	0.066415
	AB	LH5-2	#48	bdl	50.8312	bdl	38.5513	0.836853	2.1824	0.0945069	0.106729	92.603		0.865253	0.0190232	0.0873154	1.02614	-	0.00226466	-
	AB	LH5-2	#122	1.35624	41.6525	0.47028	45.0549	1.03522	0.405269	0.133066	bdl	90.184		0.840307	0.0246839	0.0170078	0.881999	0.0156031	-	0.220399
	AB	LH5-2	#154	0.217905	48.7936	0.0517063	41.7849	1.20566	0.538847	bdl	bdl	92.699		0.948643	0.0277757	0.0218489	0.998267	0.0016575	-	0.00180818
	AB	LH27-1	#107	0.098322	49.315	bdl	46.9149	0.842164	0.272869	0.13135	bdl	97.672		0.928982	0.0184203	0.0105046	0.957907	-	-	0.0841859

## Sheet: S5b - Opaque micro
	Table S5b. Opaque and Spinel: complete dataset for the EMPA, chemical formulae and thermobarometry results of Opaque and Spinel in groundmass from LHPCS lavas
	Spinel
	Rock Type	Sample	Spot	SiO2	TiO2	Al2O3	FeOtot	MnO	MgO	CaO	Cr2O3	Total		Fe2+	Mn	Mg	Si	Ti	Al	Cr	Fe3+
		(thin section)		(wt%)										(apfu)
	TR	LH5-1	#2	bdl	15.3303	1.82089	75.1466	0.569117	1.53967	bdl	0.0824498	94.558		1.33091	0.0182215	0.0867629	-	0.43589	0.0811214	0.00246412	1.04464
	TR	LH6-1	#216	bdl	15.7558	2.03336	74.4951	0.638686	1.66186	bdl	0.0414021	94.635		1.33291	0.0203887	0.0933726	-	0.446669	0.0903208	0.00123371	1.01511
	TR	LH6-1	#248	0.108444	15.7444	1.70882	74.4676	0.605616	1.80937	bdl	0.0457205	94.562		1.3299	0.0193599	0.101802	0.00409286	0.446966	0.0760102	0.00136429	1.02051
	TR	LH6-1	#249	0.0620831	16.2734	1.97683	74.0364	0.561945	1.60565	bdl	0.0523489	94.593		1.35615	0.0179703	0.0903724	0.00234395	0.462149	0.0879634	0.00156264	0.981487
	TR	LH6-1	#254	0.128688	2.22183	5.94365	76.2716	1.38339	5.46904	0.0553118	bdl	91.511		0.722445	0.0428819	0.298376	0.00470958	0.0611625	0.256362	-	1.61189
	TR	LH6-1	#268	0.0880703	16.3253	1.88428	74.0707	0.593289	1.68197	bdl	0.0480515	94.707		1.35277	0.0189437	0.094523	0.00332002	0.462916	0.0837167	0.00143217	0.98238
	TA	LH13	#34	0.56464	15.1475	0.368844	72.3415	0.460203	0.344327	0.18714	0.0527506	89.536		1.43984	0.0157946	0.0207995	0.0228794	0.461683	0.0176146	0.00168996	1.01157
	TA	LH13	#35	0.607295	14.0681	0.903127	73.8614	0.427882	0.523451	0.435763	0.0949817	90.957		1.3796	0.0143612	0.0309218	0.0240647	0.419321	0.0421779	0.00297574	1.06808
	TA	LH13	#53	0.0446891	15.9223	1.20495	71.3845	0.347834	1.28014	0.1035	0.935773	91.238		1.38222	0.0116001	0.0751401	0.00175957	0.471564	0.0559152	0.0291306	0.968306
	TA	LH13	#54	0.0482335	13.906	1.70193	75.0918	0.565533	0.818914	0.0915862	0.277683	92.518		1.33791	0.018583	0.0473609	0.00187121	0.405794	0.0778165	0.00851723	1.09834
	TA	LH13	#106	0.055934	14.1196	2.39453	73.8254	0.332188	2.02042	0.04904	0.11791	92.919		1.27953	0.0107286	0.114848	0.00213279	0.404972	0.107609	0.00355466	1.07463
	TA	LH13	#107	0.0533126	14.8772	2.22819	73.912	0.395929	2.31299	0.112355	0.106583	94.01		1.27639	0.0126279	0.129841	0.00200751	0.421383	0.0988862	0.00317316	1.05116
	TA	LH21-2	#22	0.228524	18.8838	1.1851	70.5785	0.501349	1.44256	0.0986837	0.0452972	93.077		1.4545	0.016423	0.0831703	0.00883808	0.549346	0.0540178	0.00138507	0.828229
	TA	LH26-1	#88	0.0453728	4.46588	2.06378	83.2252	0.197056	1.97508	bdl	0.0696854	92.136		1.01119	0.00637021	0.112376	0.00173171	0.128208	0.092832	0.00210279	1.64519
	TA	LH26-1	#89	bdl	4.64599	2.0377	83.8296	0.150244	1.97213	bdl	0.0639698	92.781		1.01621	0.00482524	0.111475	-	0.132509	0.0910609	0.00191772	1.642
	TA	LH26-2	#184	bdl	14.1937	3.17226	75.9576	0.353808	3.76614	bdl	0.0662168	97.57		1.17028	0.010715	0.200744	-	0.381737	0.133679	0.00187189	1.10097
	TA	LH26-2	#190	0.0432158	13.7504	3.20234	76.7558	0.35928	3.39051	0.114279	0.0478273	97.682		1.17545	0.0108852	0.180797	0.00154583	0.369968	0.135002	0.0013526	1.12062
	TA	LH27-2	#123	0.0872203	13.0263	1.63509	74.1377	0.452701	1.70112	0.0614368	0.0624436	91.164		1.26937	0.0149688	0.0989999	0.00340493	0.382509	0.0752297	0.00192732	1.15102
	TA	LH27-2	#124	0.0785551	14.7853	1.49614	73.5755	0.307833	1.72995	bdl	0.0697615	92.134		1.32409	0.0101076	0.0999741	0.00304522	0.431126	0.0683556	0.00213814	1.06116
	TA	LH27-2	#125	bdl	14.0321	1.63341	73.7616	0.417338	1.67319	0.057309	0.0797632	91.702		1.29735	0.0137476	0.0970074	-	0.41049	0.0748693	0.00245262	1.1017
	TA	LH27-2	#147	0.0485718	13.1329	2.315	73.7278	0.506221	2.19534	bdl	0.0487236	92.009		1.23928	0.01648	0.125789	0.00186687	0.379683	0.104867	0.00148062	1.13055
	TA	LH27-2	#148	0.0821582	14.3129	2.22219	72.5043	0.346424	2.13135	0.0563358	0.0593797	91.764		1.28259	0.011332	0.122709	0.00317296	0.415787	0.101146	0.00181312	1.05912
	AB	LH5-2	#8	0.365835	24.8298	0.516847	65.9901	0.564177	1.40783	0.0914857	0.232462	94.076		1.632	0.0184509	0.0810354	0.0141254	0.721141	0.0235199	0.00709651	0.498851
	AB	LH5-2	#54	0.0776665	26.0468	0.103146	63.804	0.617948	0.455295	0.143398	bdl	91.297		1.73742	0.0210751	0.0273296	0.00312727	0.788887	0.00489485	-	0.411077
	AB	LH5-2	#70	bdl	23.3882	bdl	66.2056	0.577545	0.175157	bdl	bdl	90.449		1.68548	0.0199099	0.0106276	-	0.716015	-	-	0.567969
	AB	LH27-1	#137	0.541598	18.2935	0.942967	69.1846	0.590542	0.552176	0.664699	0.0481817	90.852		1.4884	0.019916	0.0327757	0.0215647	0.547889	0.0442505	0.00151678	0.815326
	AB	LH27-1	#138	0.328312	18.8977	0.845502	68.5085	0.599927	0.548917	0.665187	0.0646875	90.495		1.50067	0.0203466	0.0327659	0.013146	0.569176	0.0399005	0.00204787	0.793407
	AB	LH27-1	#21	1.69694	2.4348	1.18371	83.3908	0.304673	0.440633	0.34157	bdl	89.936		1.08878	0.0101942	0.0259489	0.0670346	0.072348	0.0551105	-	1.66612
	AB	LH27-1	#4	0.187201	24.2088	1.28868	67.0697	0.571303	1.31023	0.154937	0.0402068	94.891		1.60251	0.0184599	0.0745132	0.00714141	0.694671	0.0579398	0.00121269	0.537223
	AB	LH27-1	#125	0.108933	24.7927	1.37884	65.8547	0.493354	1.88789	0.180003	0.63017	95.328		1.57947	0.0157927	0.106364	0.00411689	0.704799	0.0614159	0.0188297	0.501923
	Rutile
	Rock Type	Sample	Spot	SiO2	TiO2	Al2O3	FeOtot	MnO	MgO	CaO	Cr2O3	Total		Fe2+	Mn	Mg	Ti	Al	Cr	Fe3+
		(thin section)		(wt%)										(apfu)
	TA	LH26-1	#81	bdl	95.678	bdl	1.93165	bdl	bdl	0.178461	0.0611568	97.91		0.043878	-	-	1.95481	-	0.00131335	-
	TA	LH26-1	#82	0.122931	95.2654	0.0875421	2.17345	bdl	0.0456486	bdl	0.0472007	97.769		0.0493356	-	0.00184711	1.945	0.00280045	0.00101293	-
	Ilmenite
	Rock Type	Sample	Spot	SiO2	TiO2	Al2O3	FeOtot	MnO	MgO	CaO	Cr2O3	Total		Fe2+	Mn	Mg	Ti	Al	Cr	Fe3+
		(thin section)		(wt%)										(apfu)
	TR	LH5-1	#22	bdl	47.0462	0.107515	45.7522	0.553078	2.62469	0.0519645	bdl	96.184		0.793436	0.0119875	0.100125	0.905549	0.00324253	-	0.185659
	TR	LH5-1	#23	bdl	46.9302	0.107512	45.5352	0.600663	2.72765	0.173808	bdl	96.114		0.786998	0.0130314	0.104153	0.904182	0.00324556	-	0.18839
	TR	LH6-1	#247	bdl	47.3417	0.110646	45.5183	0.778989	3.31099	0.0454134	bdl	97.13		0.756005	0.0166193	0.124326	0.896951	0.00328464	-	0.202814
	TA	LH13	#124	0.112181	47.1075	bdl	48.1363	0.772218	0.325236	0.2094	bdl	96.789		0.892766	0.0170268	0.0126216	0.922414	-	-	0.155171
	TA	LH15	#57	bdl	45.4119	0.565905	46.2822	0.411138	4.78541	0.0661042	bdl	97.564		0.658572	0.00859703	0.176118	0.843286	0.0164655	-	0.296962
	TA	LH26-1	#83	bdl	41.2881	0.561953	48.6871	0.137727	3.88232	bdl	bdl	94.598		0.642137	0.00297819	0.147757	0.792872	0.0169084	-	0.397348
	TA	LH26-1	#84	bdl	41.7497	0.809139	47.2048	0.204302	4.04128	bdl	bdl	94.075		0.646049	0.00443523	0.154414	0.804898	0.024442	-	0.365762
	TA	LH26-1	#85	0.0466952	33.7446	3.10104	53.6522	0.118741	1.34689	bdl	0.056789	92.11		0.611995	0.00264463	0.0527981	0.667438	0.0961039	0.00118064	0.567839
	TA	LH26-1	#86	0.0522035	33.2386	3.08683	54.5339	0.150895	1.36691	bdl	0.0705811	92.534		0.597283	0.00334283	0.0532969	0.653923	0.0951529	0.00145954	0.595541
	TA	LH26-1	#87	0.343296	32.8508	4.10845	50.7193	0.140054	1.30815	1.47956	0.0818396	91.114		0.61109	0.00320171	0.0526341	0.666925	0.130688	0.00174639	0.533715
	TA	LH26-2	#191	bdl	43.839	0.29942	49.6352	0.365709	4.05574	0.186634	bdl	98.437		0.655704	0.00763009	0.148932	0.812266	0.0086925	-	0.366775
	TA	LH27-2	#78	bdl	45.893	0.119268	44.9691	0.468716	3.31422	bdl	bdl	94.839		0.752074	0.0102313	0.127328	0.889634	0.00362257	-	0.217109
	TA	LH27-2	#115	bdl	45.5567	0.108105	46.4649	0.491684	2.7668	bdl	bdl	95.497		0.764233	0.0107067	0.10604	0.88098	0.00327556	-	0.234765
	TA	LH27-2	#116	bdl	45.1155	0.0847818	46.1155	0.48301	2.81893	bdl	bdl	94.677		0.759565	0.010597	0.108851	0.879014	0.00258821	-	0.239385
	TA	LH27-2	#117	bdl	45.4826	0.0739816	46.3034	0.510236	2.74642	0.0636871	bdl	95.21		0.765594	0.0111459	0.105592	0.882333	0.00224873	-	0.233086
	TA	LH27-2	#118	0.0454592	45.1453	0.102857	46.6099	0.422655	2.71396	0.0583379	bdl	95.181		0.763058	0.00924296	0.10446	0.876761	0.00312989	-	0.243349
	AB	LH5-2	#56	0.0674803	50.4793	bdl	44.5618	0.619144	0.919538	0.131359	bdl	96.817		0.93541	0.013598	0.0355447	0.984552	-	-	0.0308954
	AB	LH5-2	#64	bdl	49.608	bdl	45.6765	0.63934	1.09495	0.285196	0.046477	97.355		0.90425	0.0139345	0.0420026	0.960187	-	0.000945556	0.0786802
	AB	LH5-2	#78	0.0885459	48.745	bdl	46.5272	0.711327	0.919352	0.172468	bdl	97.208		0.89473	0.0155385	0.0353464	0.945615	-	-	0.10877
	AB	LH5-2	#84	0.101852	49.3287	bdl	44.4764	0.598977	1.50308	0.209848	bdl	96.312		0.891827	0.0131694	0.0581648	0.963161	-	-	0.0736787
	AB	LH5-2	#22	bdl	48.1952	bdl	45.0927	0.648726	0.711926	0.212509	0.0571217	95.003		0.916213	0.0145328	0.0280702	0.958815	-	0.00119448	0.0811746
	AB	LH5-2	#69	bdl	47.7625	bdl	45.3342	1.05527	0.437762	bdl	bdl	94.716		0.912117	0.0237133	0.0173137	0.953144	-	-	0.093712
	AB	LH5-2	#90	0.0408083	46.8765	bdl	45.8314	0.823431	0.298626	0.251027	bdl	94.177		0.913076	0.0186656	0.0119142	0.943656	-	-	0.112689
	AB	LH5-2	#1	bdl	50.8126	bdl	47.5426	0.814306	0.905327	0.139134	bdl	100.297		0.904317	0.0172388	0.0337324	0.955288	-	-	0.0894232
	AB	LH5-2	#31	0.102201	48.7802	bdl	49.7504	0.737893	0.35201	0.227458	bdl	100.027		0.894738	0.0157336	0.0132103	0.923682	-	-	0.152636
	AB	LH5-2	#39	0.25649	48.945	bdl	49.9638	0.812954	0.272637	0.0773397	bdl	100.411		0.896442	0.0172802	0.0101998	0.923922	-	-	0.152155
	AB	LH27-1	#45	0.0811639	49.1703	bdl	46.1161	0.857858	0.871112	0.29579	bdl	97.491		0.901305	0.0187326	0.0334795	0.953517	-	-	0.0929653
